# Supplementary material for: Chk1 Inhibition Hinders the Restoration of H3.1K56 and H3.3K56 Acetylation and Reprograms Gene Transcription After DNA Damage Repair
Source: Front Oncol. 2022 Apr 14;12:862592. doi: 10.3389/fonc.2022.862592 (PMC9046994; doi:10.3389/fonc.2022.862592)
Supplement: Supplementary Table 1 — Sequencing summary of all samples. [file Table_1.xlsx]

## Sheet: Table S1
SampleID	ID description	Mapped Reads	Uniq Mapped Reads	Multiple Map Reads	ReadSum	BaseSum	GC(%)	N(%)	Q20(%)	Q30(%)
T01	ctrl	41172358	39,963,652(94.52%)	1,208,706(2.86%)	21139697	6329905886	50.78	0	98.2	94.78
T02	DMSO 2h 1st time	47786696	46,428,545(94.59%)	1,358,151(2.77%)	24542241	7345011014	50.98	0	98.14	94.58
T03	DMSO 8h 1st time	40653020	38,584,527(92.24%)	2,068,493(4.95%)	20914458	6261338888	52.11	0	98.18	94.89
T04	DMSO 24h 1st time	40086703	37,308,834(89.79%)	2,777,869(6.69%)	20775351	6220368496	52.19	0	98.14	94.81
T05	Ly2606368 2h 1st time	45176569	43,902,805(94.63%)	1,273,764(2.75%)	23197132	6944424004	50.81	0	98.24	94.88
T06	Ly2606368 8h 1st time	41261969	38,978,439(91.64%)	2,283,530(5.37%)	21268293	6364873094	52.19	0	98.22	94.9
T07	Ly2606368 24h 1st time	37039932	34,467,882(89.90%)	2,572,050(6.71%)	19169881	5738694650	52.73	0	98.08	94.77
T08	DMSO 2h 2nd time	43439064	42,170,754(94.32%)	1,268,310(2.84%)	22355350	6679649286	50.38	0	97.88	93.93
T09	DMSO 8h 2nd time	38677700	36,938,320(92.52%)	1,739,380(4.36%)	19962349	5966088128	51.83	0	97.73	93.74
T10	DMSO 24h 2nd time	44845544	42,468,176(91.32%)	2,377,368(5.11%)	23251392	6950123588	51.67	0	97.57	93.46
T11	Ly2606368 2h 2nd time	44333392	43,048,002(94.08%)	1,285,390(2.81%)	22878752	6842410980	50.54	0	97.48	93.03
T12	Ly2606368 8h 2nd time	42399596	40,166,298(91.67%)	2,233,298(5.10%)	21908711	6550101490	51.61	0	97.56	93.3
T13	Ly2606368 24h 2nd time	42818072	40,166,522(90.59%)	2,651,550(5.98%)	22170534	6632408136	52.44	0	97.61	93.53
T14	DMSO 2h 3rd time	43484204	42,223,517(94.33%)	1,260,687(2.82%)	22381708	6695233022	50.29	0	97.73	93.61
T15	DMSO 8h 3rd time	43899249	42,016,150(92.86%)	1,883,099(4.16%)	22624323	6764602408	51.17	0	97.74	93.59
T16	DMSO 24h 3rd time	42060646	40,078,332(92.10%)	1,982,314(4.56%)	21758801	6500729434	51.67	0	97.58	93.47
T17	Ly2606368 2h 3rd time	40313809	39,005,280(93.71%)	1,308,529(3.14%)	20812419	6224301118	50.89	0	97.6	93.31
T18	Ly2606368 8h 3rd time	48654886	46,200,039(92.28%)	2,454,847(4.90%)	25032379	7479612700	51.91	0	97.91	93.97
T19	Ly2606368 24h 3rd time	47145023	44,345,148(90.79%)	2,799,875(5.73%)	24421529	7299937504	52.43	0	97.47	93.24
