# Supplementary material for: Chk1 Inhibition Hinders the Restoration of H3.1K56 and H3.3K56 Acetylation and Reprograms Gene Transcription After DNA Damage Repair
Source: Front Oncol. 2022 Apr 14;12:862592. doi: 10.3389/fonc.2022.862592 (PMC9046994; doi:10.3389/fonc.2022.862592)
Supplement: Supplementary Table 2 — Normalized reads of detected genes in each sample. [file Table_2.xlsx]

## Sheet: All_gene_fpkm.xls
T01: Control
T02: DMSO 2 hours 1st time; T03: DMSO 8 hours 1sr time; T04: DMSO 24 hours 1st time; T05: LY 2 hours 1st time; T06: LY 8 hours 1st time; T07: LY 24 hours 1st time;
T08: DMSO 2 hours 2nd time; T09: DMSO 8 hours 2nd time; T10: DMSO 24 hours 2nd time; T11: LY 2 hours 2nd time; T12: LY 8 hours 2nd time; T13: LY 24 hours 2nd time;
T14: DMSO 2 hours 3rd time; T15: DMSO 8 hours 3rd time; T16: DMSO 24 hours 3rd time; T17: LY 2 hours 3rd time; T18: LY 8 hours 3rd time; T19: LY 24 hours 3rd time;
#ID	gene_symbol	T01	T02	T03	T04	T05	T06	T07	T08	T09	T10	T11	T12	T13	T14	T15	T16	T17	T18	T19
Human_newGene_42997	Human_newGene_42997	0.412564	0.438143	0	0.166799	0.291564	0.105318	0	0.234554	0.172443	0.202486	0.129837	0.051226	0.097931	0.04929	0.083646	0.154612	0.152567	0	0
ENSG00000110514	MADD	13.1369	12.536	6.24804	3.72582	13.5445	5.22138	2.91725	14.6882	6.06895	7.7587	13.6928	4.21537	5.28594	15.1096	6.48376	8.37258	13.8022	5.93811	4.25103
ENSG00000086015	MAST2	18.3733	18.8751	14.3001	12.6795	18.4285	13.6663	11.5199	16.783	10.6646	11.7947	18.5872	10.8413	6.73134	17.3188	10.3179	11.2007	18.5633	10.4079	6.97938
Human_newGene_40626	Human_newGene_40626	13.6769	6.58672	5.81374	6.73374	15.1216	8.07664	5.58612	17.6587	9.2986	8.249	15.332	8.30096	6.39193	8.23418	10.4464	8.94457	19.0635	8.66554	5.91278
Human_newGene_40622	Human_newGene_40622	4.27865	3.67436	2.65591	3.88349	4.66463	3.93139	3.78839	3.78774	2.23647	2.03601	6.70888	2.35279	1.23285	3.52875	3.21899	2.10397	3.72263	3.18615	3.19298
Human_newGene_40628	Human_newGene_40628	0.689627	0.980374	0.247003	0.16805	0.709932	0.274861	0.216829	1.56439	0.78582	0.43712	1.4365	0.509979	0.234627	1.36876	0.890393	0.295276	1.42771	0.541374	0.350129
ENSG00000169740	ZNF32	13.3039	13.6975	13.243	6.7	15.3303	12.9996	5.69327	17.2514	14.3152	9.89646	17.5094	12.7962	12.3975	17.3742	16.2455	9.78477	17.0407	12.7442	8.01433
Human_newGene_42669	Human_newGene_42669	0.894965	0.615629	0.819211	0.961387	0.575488	2.52171	2.07737	0.412127	0.688612	0.56145	0.328141	1.41163	0.610926	0.969941	1.25825	0.656268	0.651015	1.0367	0.661027
ENSG00000169744	LDB2	0.537157	0.415611	0.202836	0.120125	0.346227	0.118536	0	0.460386	0.096287	0.149966	0.521096	0.04822	0.192717	0.691582	0.29198	0.146337	0.541785	0.106308	0.084694
ENSG00000168298	HIST1H1E	0.748832	0.46373	1.03199	1.51637	0.97133	2.63012	2.34279	0.544363	0.917704	0.204457	0.393603	0.908649	1.93608	0.1349	0.60773	0.279935	0.581059	0.990896	1.66765
ENSG00000168297	PXK	7.33399	8.98587	5.08756	3.68535	8.48278	6.62898	2.82795	9.42584	3.9156	5.13776	7.63075	3.61585	3.55398	7.40867	4.78758	5.96496	6.60614	3.9561	2.40616
ENSG00000168291	PDHB	45.6843	45.3651	56.6528	36.9253	46.4452	48.9733	42.1701	37.7237	42.0353	26.551	38.3778	49.1825	34.3346	39.9251	39.2891	29.9514	41.4176	47.2564	27.8073
Human_newGene_47014	Human_newGene_47014	4.88281	4.821	1.26214	0.567051	5.19017	1.37484	0.759491	3.74645	0	2.43306	4.16495	1.1983	1.36726	3.81863	2.60418	2.97782	4.50046	1.37335	0.743384
Human_newGene_47012	Human_newGene_47012	2.92176	2.94797	0.751155	0.436159	3.07069	0.873596	0.427103	2.42895	1.11773	1.57927	2.82308	0.701114	0.965837	2.54922	1.75647	1.79664	2.83054	0.995286	0.51589
ENSG00000149792	MRPL49	21.5848	26.6551	55.9541	48.0532	13.197	26.17	22.4295	32.7824	45.4702	45.0346	17.3266	40.9865	53.9992	15.6879	46.3292	47.9471	30.3699	41.4503	13.282
ENSG00000149798	CDC42EP2	4.89467	5.34888	0.73688	2.42268	4.52997	1.28351	1.75934	3.09668	1.68948	5.13638	3.10599	0.687246	4.29008	3.56455	1.94984	4.94743	3.71423	0.606856	2.28209
ENSG00000183054	RGPD6	9.55517	10.5154	2.61172	4.47668	11.9454	3.51506	3.33478	14.0048	6.10177	10.1522	11.8327	5.0163	5.38416	16.8206	5.87286	10.6196	13.6277	1.21049	5.42734
ENSG00000250565	ATP6V1E2	6.06205	4.43932	3.74713	2.02769	5.16356	2.92505	2.39728	4.35125	1.92092	2.41908	3.53832	2.45757	2.03115	4.02826	2.92486	2.85497	3.77376	1.91661	2.0506
Human_newGene_4914	Human_newGene_4914	0	0.111454	0.1546	0	0	0.228911	0	0	0	0	0.177621	0.070647	0.135617	0.138536	0.077341	0.277581	0.28132	0.442672	0
ENSG00000187961	KLHL17	4.62112	5.26034	6.7773	7.49415	5.6521	4.11206	6.85146	4.95706	6.4736	6.25735	4.42811	5.38474	5.31334	5.48793	5.98297	6.36117	5.90593	6.16308	6.43508
ENSG00000187969	ZCCHC13	0	0	0	0	0	0	0	0	0	0	0	0	0	0	0	0	0.000554	0	0
ENSG00000162843	WDR64	0	0	0	0	0	0	0	0	0.001057	0	0	0	0	0	0	0	0	0	0
ENSG00000162849	KIF26B	0.047577	0.097965	0.00873	0.057877	0.08199	0.037408	0	0.164192	0.018622	0.051599	0.155478	0.026982	0.037088	0.218655	0.077377	0.019603	0.146086	0.024749	0.003833
ENSG00000149243	KLHL35	0	0.01342	0.074559	0	0	0.040929	0.016317	0.026523	0.077634	0.036807	0	0	0.07535	0	0	0.102094	0.028442	0.132818	0
ENSG00000184702	2022-09-05	28.368	29.7161	23.263	21.3271	31.7758	22.434	15.6108	55.9979	47.9588	40.1681	54.8713	46.569	20.2916	45.4257	45.4381	32.3512	53.1989	42.614	30.3812
ENSG00000283683	MYOCOS	0	0	0	0	0	0	0	0	0	0.023554	0	0	0	0	0	0	0	0	0
ENSG00000184708	EIF4ENIF1	9.83972	9.28215	2.40819	2.97027	8.4861	2.46467	2.31361	9.41894	3.45701	6.29828	8.12054	2.51103	3.58764	9.34385	4.57238	5.58939	7.76342	2.37848	2.81692
ENSG00000184709	LRRC26	0	0	0	0	0	0	0.19503	0	0.134026	0	0.083026	0	0	0.084981	0	0	0.179622	0.14445	0.038402
ENSG00000163462	TRIM46	1.84576	1.84426	1.45906	1.38711	1.96077	0.888521	1.04173	1.52809	0.712326	2.301	1.72011	0.812879	1.05284	1.15794	1.71586	1.87797	1.73125	0.762595	1.01534
ENSG00000163463	KRTCAP2	50.2693	48.2482	104.045	112.579	51.4859	93.2825	118.289	54.8109	90.3581	86.496	51.1795	88.7869	109.443	54.6209	84.1008	89.7349	53.4967	101.226	109.882
ENSG00000163464	CXCR1	0	0	0	0	0	0	0	0	0	0	0	0	0	0	0	0	0	0	0
ENSG00000163466	ARPC2	127.967	112.668	165.969	164.552	128.541	185.757	192.748	115.427	149.574	134.536	112.052	158.53	148.042	122.626	143.19	126.321	103.328	149.842	140.99
ENSG00000163467	TSACC	0.868816	1.40599	0.48692	0.329014	0.545419	0.585563	0.077015	0.580311	0.425038	0.448982	0.58656	0.462215	0.487429	0.928329	0.402521	0.50815	0.711089	0.458846	0.407899
ENSG00000163468	CCT3	326.684	307.019	348.69	287.323	277.435	326.972	305.477	256.526	249.877	215.561	228.386	281.721	202.295	243.075	256.736	229.593	268.221	253.214	224.272
ENSG00000162599	NFIA	3.23927	2.54669	0.383723	0.725707	2.59389	0.591084	0.582109	4.00944	0.44102	1.11942	4.4698	0.388464	0.14197	4.19034	0.823923	1.47956	2.88387	0.184004	0.131515
ENSG00000162598	C1orf87	0	0	0	0	0	0	0	0	0	0	0	0	0	0	0	0	0	0.022043	0
ENSG00000162592	CCDC27	0	0	0	0	0	0.055652	0.023449	0.040864	0	0.02005	0.046166	0	0	0.007352	0.029066	0	0.03249	0.027649	0
ENSG00000162591	MEGF6	0.019283	0.092085	0.123631	0.170876	0.086854	0.141982	0.12649	0.246126	0.673832	0.36491	0.633941	0.579786	0.450266	0.361221	0.441387	0.588234	0.448428	0.542274	0.414152
ENSG00000029363	BCLAF1	34.3616	32.8809	24.2173	21.8368	33.4556	24.0225	21.9153	33.968	16.7968	21.8111	33.7921	20.7671	14.6263	32.869	21.0661	22.1521	32.8048	19.803	18.1491
ENSG00000162595	DIRAS3	0.237212	0.091345	0.312146	0.082651	0.144931	0.315288	0.142471	0.864023	0.761264	0.320713	0.171521	0.352661	0.074959	0.779577	0.473367	0.427321	0.468471	0.452362	0.158615
ENSG00000162594	IL23R	0	0.015697	0	0	0	0	0	0	0	0	0.034528	0	0.010039	0	0	0	0.037818	0	0
ENSG00000118640	VAMP8	0.20142	0.667279	0.535792	0.554023	0.254534	1.04337	0.784295	1.64463	2.04323	1.87068	1.28843	1.48238	2.64306	0.825872	2.28791	2.34115	1.01358	1.60562	1.01433
ENSG00000168488	ATXN2L	68.3609	64.9725	57.4979	68.6653	61.3887	60.816	63.0088	44.3498	44.2558	51.6521	54.6961	38.1769	45.6707	53.3711	44.6319	54.7207	48.2717	46.8767	43.3276
ENSG00000159961	OR3A3	0.05595	0.229342	0.027367	0	0.050986	0	0.061227	0	0	0	0	0	0	0.053179	0	0.027313	0.142503	0.046276	0.024031
ENSG00000115073	ACTR1B	22.0648	21.5351	36.9788	33.8117	24.1205	35.1996	37.4391	24.7343	37.97	26.4851	24.2641	38.8302	36.302	26.096	34.1048	28.3116	26.58	38.7422	35.7808
Human_newGene_47903	Human_newGene_47903	0	0.097169	0	0	0	0	0	0	0	0.576384	0	0	0.100479	0.382428	0	0	0.114715	0.171361	0.188934
Human_newGene_26134	Human_newGene_26134	17.009	14.7458	17.8022	12.5084	16.9385	14.1454	13.2912	12.5191	13.4142	12.4369	11.7558	13.0313	10.5873	10.6455	12.0737	10.756	12.6889	14.2234	14.6645
ENSG00000259164	AC007375.1	0	0	0	0.051393	0	0	0.137428	0	0.005541	0	0.067944	0	0.013611	0	0	0.038426	0.006082	0	0
Human_newGene_26133	Human_newGene_26133	0.92572	0.943197	0.69573	1.16375	0.77277	0.695721	0.551205	1.08561	0.182179	1.75596	0.883	0.60282	1.0355	0.962426	0.713623	1.3834	0.905317	0.348605	1.0054
ENSG00000213853	EMP2	14.6894	15.8802	13.0615	11.7206	14.7978	12.5162	9.63252	19.7386	14.9276	15.7944	19.1978	13.7859	11.0225	19.0622	15.6937	15.8011	19.662	13.7336	11.3958
ENSG00000213859	KCTD11	1.69138	42.6432	17.5316	8.82106	36.2419	19.9591	11.5912	29.6883	14.6399	16.9892	30.3602	17.1382	24.2001	31.2293	16.4746	18.1897	31.8937	18.341	13.9487
ENSG00000055070	SZRD1	32.9218	31.8602	35.9598	39.7848	32.9674	34.8209	34.6108	29.0538	27.4174	26.3741	27.2923	26.9985	23.8555	27.6907	26.9444	29.4011	30.0298	25.1298	29.4136
ENSG00000155719	OTOA	0	0	0.01701	0.014497	0	0	0	0	0.02183	0.024936	0.025947	0.02078	0.028359	0	0.015668	0	0	0.014298	0
ENSG00000162337	LRP5	4.03311	4.66513	2.69461	2.3175	4.24282	3.29985	1.85637	6.2686	4.26302	4.30733	7.47376	3.9905	3.44022	6.14388	4.80629	4.32853	7.57403	4.07369	3.13289
ENSG00000155714	PDZD9	0.115324	0	0	0	0.037004	0.078425	0.059879	0	0	0.037162	0	0	0	0	0.065079	0.109358	0.01451	0	0
ENSG00000182010	RTKN2	5.05233	4.36892	3.42748	2.14295	5.4705	3.39764	2.33871	4.36668	2.45708	2.33729	5.69956	3.51086	2.17781	4.46868	2.73278	2.63881	5.38686	3.4305	1.83941
ENSG00000182013	PNMA8A	0.029302	0.025287	0.014333	0	0	0.025113	0	0.036944	0.022879	0.013248	0.067594	0.013953	0	0.090515	0.0136	0	0.05881	0.027289	0.012585
Human_newGene_4532	Human_newGene_4532	0.657778	0.301265	0	0	0.118324	0.124563	0.094525	0.287179	0.175349	0.154239	0.34255	0.092138	0.25352	0.307212	0.369597	0.36186	0.072929	0.342829	0.355316
ENSG00000164659	KIAA1324L	1.61647	1.40678	0.828704	0.484925	1.47458	0.955484	0.665026	1.71469	1.18325	1.15806	2.01812	1.18962	0.779064	1.99988	1.38269	1.06613	1.88212	1.06159	1.72939
Human_newGene_9726	Human_newGene_9726	0	0	0	0	0	0.08937	0	0	0	0	0	0	0.09684	0.175928	0.053159	0	0	0.382731	0
Human_newGene_4538	Human_newGene_4538	6.07073	6.14751	8.4673	12.9991	5.95229	9.15362	12.6194	12.1172	19.0791	13.8907	11.1988	16.3148	15.9955	12.6566	17.8384	15.0571	10.3532	17.1603	15.7718
Human_newGene_4539	Human_newGene_4539	0.429274	1.15352	1.27783	0.262945	0.776341	0.716322	0.209384	0.851016	0.358391	1.05349	1.17015	0.555391	1.04282	1.69948	0.849674	0.825483	1.12884	0.95636	0.197696
ENSG00000178372	CALML5	0	0.094839	0	0	0	0	0	0	0	0	0	0	0	0	0	0	0	0	0
ENSG00000164651	SP8	0.358292	0.563353	0.055768	0.07129	0.323748	0.162099	0.084138	1.05731	0.779153	0.854402	0.925553	0.317888	0.719565	1.26421	0.727868	1.1702	1.14887	0.255449	0.089597
ENSG00000164654	MIOS	11.9294	12.2611	5.7923	4.16892	12.5057	5.77588	4.26741	13.0426	5.71874	8.8439	15.7957	5.32683	6.20395	12.8135	9.29036	5.41762	12.5752	7.40578	4.29111
ENSG00000114978	MOB1A	35.4268	33.4445	22.0759	19.6781	34.0281	22.4827	17.8495	36.8676	24.1517	26.4371	35.8043	22.7409	20.8303	38.7892	28.0677	26.7587	32.1272	22.3587	19.9346
ENSG00000206113	CFAP99	0.022692	0	0	0.091909	0.013118	0.070219	0	0	0.267277	0.09406	0.032815	0.071536	0.056649	0.054835	0.1572	0.084348	0.022843	0.075276	0.104117
ENSG00000161021	MAML1	6.28843	6.6062	2.24828	1.51121	6.57679	2.25845	1.3437	6.76641	2.3419	3.6567	7.0041	1.6724	2.11088	6.28467	3.49882	4.05165	6.04183	1.77812	1.68752
ENSG00000261609	GAN	2.04253	2.42486	0.473636	1.16783	2.26423	0.965855	0.566784	2.57466	0.826824	1.44163	2.15474	0.737806	0.951601	2.70155	1.03897	2.05058	2.1482	0.741246	0.716119
ENSG00000254692	AL136295.1	0.999587	0	2.09577	0	0	3.25367	0	0	0.647339	0	0	0	0.696735	0	0	1.19685	0	0	0
ENSG00000257341	AL928654.3	0.158532	0.074703	0.110277	0.069846	0.118918	0.080756	0.020887	0.268874	0	0	0	0.105049	0	0	0	0	0.075815	0.098941	0.113683
ENSG00000119509	INVS	4.26509	4.27027	4.02767	3.07974	4.19525	3.01966	2.86167	4.60609	2.71967	2.60957	4.73225	2.82003	1.76798	4.50297	3.01719	3.03105	5.02549	2.71586	2.17651
Human_newGene_50627	Human_newGene_50627	0	0	0.217866	0.232392	0	0.085765	0.162231	0	0.154683	0.237683	0.110638	0.188391	0.124913	0.062555	0.073127	0.505827	0.028288	0.054985	0.518525
ENSG00000165309	ARMC3	0.033178	0.090701	0.067485	0.085967	0.078745	0.097717	0.046159	0.231374	0.195432	0.103248	0.098125	0.067253	0.036188	0.155705	0.08738	0.020733	0.116388	0.125307	0.055386
ENSG00000165304	MELK	62.3052	60.3175	28.6477	16.4082	59.5348	32.7504	15.3129	54.8744	21.9019	30.4001	59.394	25.6528	10.9069	63.3176	27.2508	37.3753	57.9944	24.4208	9.94641
ENSG00000165300	SLITRK5	0	0.00663	0	0	0.01146	0	0	0.025549	0.006681	0.010548	0.015485	0	0.003589	0.046138	0.008184	0.002492	0.014203	0.002118	0
ENSG00000101608	MYL12A	108.708	91.1854	158.743	174.644	96.1544	157.303	184.448	99.3012	144.983	142.465	101.064	162.104	194.54	103.713	142.327	144.488	101.487	159.379	179.131
ENSG00000101605	MYOM1	0.251722	0.243793	0.158882	0.136981	0.342066	0.136244	0.020197	0.266554	0.180554	0.056777	0.362788	0.086593	0.10743	0.256463	0.192435	0.166398	0.354717	0.15167	0.109868
ENSG00000121335	PRB2	0	0	0	0	0	0	0	0	0	0.069352	0	0.12431	0.201134	0.049849	0.063548	0.115655	0	0.038373	0.146532
ENSG00000198791	CNOT7	22.4097	15.391	26.131	11.6495	16.9327	15.6973	12.529	20.1202	10.9292	10.9077	24.4762	14.0918	8.17745	19.936	11.3172	10.9844	14.0411	11.3607	10.0631
ENSG00000198792	TMEM184B	24.7514	28.488	23.901	14.2825	26.6627	19.0117	14.3638	23.799	17.0594	20.7264	27.6258	15.1013	13.8266	23.8049	16.2777	16.4258	24.3078	14.8108	12.0037
ENSG00000198793	MTOR	21.2495	20.6873	12.7967	12.8212	17.5549	13.688	12.1374	15.8144	10.2208	11.5581	17.6344	9.99194	7.73559	17.7642	11.1019	11.5843	18.2853	10.2751	8.71634
ENSG00000198794	SCAMP5	4.56462	7.04737	3.31178	2.22748	5.39462	3.89829	4.41976	10.4967	2.81095	4.62183	9.39379	4.34418	2.97929	9.25741	4.27664	4.17943	6.37787	4.85384	2.92461
ENSG00000198795	ZNF521	1.5778	1.82903	0.307618	0.355274	1.66901	0.179874	0.175537	1.87184	0.60701	0.791228	1.9007	0.28733	0.375615	2.04332	1.03462	0.939838	2.40916	0.414511	0.225964
ENSG00000197779	ZNF81	2.00753	3.47352	1.17383	1.37846	2.54936	1.85683	0.404507	2.21903	1.89434	1.32034	1.65561	1.04959	0.631305	3.15145	1.87724	1.42837	1.85695	0.519601	1.21373
ENSG00000198797	BRINP2	0.011034	0.013065	0.01486	0.102624	0.110695	0.05848	0.083116	0.043296	0.01585	0.139875	0.104579	0.014419	0.162148	0.043314	0.060859	0.249206	0.183274	0	0.165545
ENSG00000198798	MAGEB3	0.095745	0.123935	0.306221	0.276645	0	0.195825	0.075088	0	0.021579	0.131435	0.022264	0.040017	0.641159	0	0.263405	0.338057	0	0.238906	0.241707
ENSG00000198799	LRIG2	1.34284	1.50871	0.38217	0.593851	1.58761	0.428022	0.397986	1.70289	0.577015	1.2628	1.33865	0.339158	0.735996	1.7627	0.924274	1.29485	1.49708	0.383022	0.492962
Human_newGene_14499	Human_newGene_14499	0	0	0.233979	0	0.310233	0.891459	0	0.088533	0	0.112585	0	0	0	0.425729	0	0.140032	0.167088	0	0
ENSG00000175550	DRAP1	183.926	173.083	383.052	592.638	211.659	391.442	664.137	205.836	379.966	326.484	166.595	377.929	423.565	170.694	365.965	425.104	161.437	487.265	524.433
ENSG00000175556	LONRF3	0.072364	0.160951	0.017689	0	0.127011	0.050482	0.059363	0.250263	0.075468	0.045341	0.156617	0.097271	0.057896	0.174674	0.083311	0.087241	0.113274	0.068552	0
ENSG00000197771	MCMBP	32.7129	31.2649	23.8808	16.0842	30.4786	22.9338	19.9033	34.5215	14.9317	17.2734	35.7841	16.6121	12.3103	33.6156	17.0439	17.2304	29.8024	17.8922	12.026
ENSG00000161682	FAM171A2	3.05992	2.78148	1.85853	1.2802	3.12059	1.61225	1.19176	5.22289	2.3616	3.26512	5.18496	2.01387	2.12707	5.40901	2.72722	3.44086	5.70618	2.50261	1.40428
Human_newGene_29218	Human_newGene_29218	2.75718	1.84692	0.80742	1.81248	2.71221	1.17414	1.3991	2.88478	1.84023	2.80892	3.03162	1.65334	1.63176	3.4342	1.99611	2.09399	2.00107	1.47224	1.33697
ENSG00000161681	SHANK1	3.13735	3.35936	2.60486	3.18799	3.01907	2.11363	3.58451	4.16501	2.73437	3.46223	4.21843	2.81808	3.08418	3.83803	2.91263	3.48203	4.41736	2.63773	3.1113
Human_newGene_29217	Human_newGene_29217	2.42351	2.07106	3.26738	2.05795	1.26762	1.93548	1.21507	3.61299	4.67235	3.21449	3.62933	3.73327	2.18049	3.57025	5.43378	4.32215	3.05431	4.23914	3.47164
Human_newGene_872	Human_newGene_872	0.159997	0.279427	0.035486	0.186871	0.0995	0.156269	0	0.495163	0.075951	0.183812	0.807185	0.034663	0.117676	0.200986	0.235483	0.248737	0.697712	0.262799	0.21489
ENSG00000284337	AC013271.1	0	0.0137	0.344306	0	0.139878	0.0163	0	0	0	0	0	0	0.456434	0	0	0.168741	0	0	0
ENSG00000100288	CHKB	5.48854	5.44736	5.60647	5.09551	4.72172	5.49747	5.0074	4.55617	6.85358	5.29277	5.46788	6.18283	6.09869	4.93095	7.23567	6.02172	5.45062	5.85595	5.14145
ENSG00000183864	TOB2	22.4845	22.5849	11.5002	17.2205	21.0548	15.4777	13.4661	21.7142	20.6594	38.174	20.7743	17.5486	36.3069	23.1187	21.5524	41.3441	20.7286	19.3213	30.4363
ENSG00000183862	CNGA2	0	0	0	0	0	0	0	0.018119	0	0	0.017739	0	0	0.018127	0	0	0	0	0
Human_newGene_10937	Human_newGene_10937	0.266263	0.412881	0	0	0.153784	0	0	0.1599	0	0.125223	0.290182	0	0	0.073618	0.039173	0	0.066778	0	0
ENSG00000124216	SNAI1	25.5816	29.2893	15.5277	20.9244	27.1384	27.2368	29.1529	23.6495	15.7581	28.4315	27.736	34.1211	53.1376	21.7325	16.8086	27.8447	27.3841	32.5007	50.8726
ENSG00000124217	MOCS3	4.25375	4.45988	4.61821	1.91067	4.21015	3.86436	2.13904	3.20273	5.68368	4.60549	2.9037	4.33619	3.91685	3.56645	5.54653	4.51162	3.13192	4.24967	3.18057
ENSG00000124214	STAU1	84.7987	77.2535	62.9504	39.4384	82.4537	59.1788	33.2363	79.9847	43.5691	46.7218	76.0134	46.9305	34.9559	78.0762	45.0478	44.7607	74.1243	47.8968	29.4791
ENSG00000124215	CDH26	0.085143	0	0	0	0	0.032804	0.016281	0.016137	0.017723	0.038026	0.044859	0	0	0.030482	0.044959	0	0.034609	0.014575	0
ENSG00000124212	PTGIS	1.40349	1.71028	0.871333	0.544229	1.6549	0.901264	0.508619	3.17553	1.75576	1.27671	3.05746	1.47998	0.870639	3.14226	2.00094	1.39456	3.16288	1.69894	0.890046
ENSG00000247596	TWF2	47.0664	50.3449	79.7188	67.9988	49.6101	74.4137	80.4874	40.887	55.2116	43.0639	45.1685	56.6166	50.7876	44.4044	46.2666	43.6307	49.4049	59.4318	51.6383
ENSG00000247595	SPTY2D1OS	0.286488	0.552691	0.131423	0.153873	0.481801	0.06219	0.180823	0.408179	0.072693	0.194828	0.62488	0.15714	0.247798	0.302916	0.389368	0.324368	0.175268	0.019131	0.216474
Human_newGene_42516	Human_newGene_42516	0	0	0	0	0	0.527782	0	0	0.126727	0.061213	0	0	0	0	0	0	0.058944	0	0
Human_newGene_14729	Human_newGene_14729	0.72447	0.520551	0.404249	0.283164	0.036117	0.370935	0.375511	0.369032	0.058768	0.136797	0.398083	0.068897	0.414324	0.50231	0.558981	0.439016	0.334834	0	0.195572
ENSG00000161970	RPL26	629.508	551.784	1120.55	1147.96	546.4	1056.27	1167.96	727.8	1339.6	1054.4	781.862	1599.86	1367.62	678	1262.87	1109.68	731.641	1524.5	1546.57
ENSG00000161973	CCDC42	0	0	0	0	0.035846	0	0	0	0.028144	0	0.036589	0.035715	0	0	0.035054	0	0.032921	0	0
ENSG00000255275	AL080251.1	0	0.057899	0.156121	0	0	0.029226	0.003162	0	0.051627	0.014556	0	0.225359	0	0	0.169328	0	0.028821	0.041336	0.028852
ENSG00000255274	SMIM35	0	0	0.038014	0	0	0	0	0.009908	0	0.026986	0	0.043799	0.052492	0	0	0.031067	0	0.01316	0.013667
ENSG00000160087	UBE2J2	17.1084	16.9963	12.421	8.50889	17.6175	8.52895	7.46015	18.6182	8.05476	11.7141	13.026	7.26151	16.7224	18.8361	9.08375	12.3151	14.7889	7.92834	11.4953
ENSG00000036054	TBC1D23	20.0748	18.1108	11.4717	5.29543	18.7246	10.7746	4.95612	19.9537	7.03968	7.46548	19.9145	7.43738	5.91158	20.3649	8.26905	7.18636	18.386	7.41737	4.63504
ENSG00000002587	HS3ST1	0.033649	0.01448	0	0	0.01024	0	0	0.019182	0.014044	0.018477	0.01878	0.022091	0.006344	0.025586	0.024989	0.039423	0.010284	0	0.011562
ENSG00000002586	CD99	21.3508	22.4273	52.9073	81.9323	23.359	46.0276	77.6494	27.3519	62.1652	70.791	28.6036	55.2901	79.9428	30.5825	57.508	65.6678	27.3562	58.2384	83.5984
Human_newGene_6266	Human_newGene_6266	0.794848	1.43018	0.633494	1.07922	0.804338	0.620912	0.319701	0.817031	1.0936	0.972097	0.658188	0.344827	1.26885	0.62251	0.688653	1.54908	1.3282	0.596111	0.495056
Human_newGene_6267	Human_newGene_6267	0	0	0	0	0	0	0.635453	0	0	0	0.08371	0	0	0	0	0	0	0	0
Human_newGene_6268	Human_newGene_6268	4.08698	7.3304	3.4209	7.79018	5.20446	3.73653	4.47606	4.29209	4.84612	5.94436	4.54902	4.73348	3.81769	4.21225	4.03805	8.20121	3.58262	3.55248	4.29368
ENSG00000177954	RPS27	603.087	503.365	1392.8	2219.64	573.393	1475.59	2478.27	812.31	1922.66	2260.49	777.016	1963.82	2946.55	799.498	1736.17	2416.78	690.329	2141.63	3163.32
ENSG00000177951	BET1L	20.6284	22.8848	12.0683	8.11593	21.2388	11.6319	5.79742	22.3051	16.2245	16.5606	21.3959	13.1871	15.4695	19.8487	18.8374	17.329	22.34	13.1485	9.80356
ENSG00000198242	RPL23A	544.269	535.561	974.064	1060.46	573.632	1026.37	1212.18	662.416	1183.99	1088.96	634.646	1301.08	1363.85	662.166	1183.02	1086.46	643.649	1276.99	1451.3
ENSG00000198246	SLC29A3	3.85601	3.78332	1.127	1.59708	3.49761	1.85687	1.14232	4.53596	2.11426	2.99948	5.20127	1.06538	3.0923	4.01171	3.45434	3.40083	4.84519	1.57864	2.59539
ENSG00000092140	G2E3	5.09501	4.43355	2.37799	1.35192	6.00723	1.914	1.96617	5.55979	1.75129	2.33938	7.52597	2.31114	1.52121	5.25207	1.88499	3.52198	7.02509	2.09605	1.51599
ENSG00000135916	ITM2C	73.6829	86.8171	141.033	201.289	77.2384	131.074	224.221	139.53	95.7567	90.6321	90.871	172.897	94.354	117.769	171.534	214.884	130.382	203.294	264.707
ENSG00000135914	HTR2B	0.045626	0.107082	0.134598	0.293908	0.069482	0.025303	0.274004	0.03331	0.104299	0.064736	0	0.113549	0	0	0.165735	0	0.081686	0.056668	0.059618
ENSG00000135913	USP37	8.7942	6.91328	1.69532	1.55655	6.6964	1.58267	0.842872	8.35692	2.13585	3.08227	7.0313	1.19965	0.925602	8.12357	3.28199	3.18279	6.78287	1.09037	0.932957
ENSG00000135912	TTLL4	10.488	13.5869	3.60909	3.95406	12.1239	4.63054	2.99072	12.7428	3.50009	6.80513	7.5288	2.32308	2.46076	10.9123	4.46971	7.25198	10.009	2.96665	3.10021
ENSG00000092148	HECTD1	14.5369	14.7372	8.46503	6.15187	14.1147	7.79063	6.08363	14.9533	7.62389	11.085	15.7426	5.40689	5.9877	11.8685	9.28569	10.2884	13.1535	4.63036	6.93767
ENSG00000034693	PEX3	17.4012	19.1541	14.4254	10.2548	15.4381	16.8633	11.0178	18.7492	12.5966	10.6788	16.7244	12.7115	6.18674	16.9291	13.3323	10.958	16.9488	12.8736	6.98228
ENSG00000135919	SERPINE2	24.6552	23.0073	19.0081	27.8158	23.4685	19.5708	24.9035	24.3966	26.8526	34.3822	24.9191	25.2719	32.6445	25.4412	30.163	38.1697	24.772	25.1826	28.1915
ENSG00000176396	EID2	13.7587	12.2419	16.6768	12.7366	13.3914	16.1096	10.4568	14.6729	23.2848	21.835	14.2055	15.1921	16.9122	14.0859	20.8369	20.4222	12.4383	15.7852	14.2487
ENSG00000176390	CRLF3	9.8973	9.43019	7.05678	5.06906	9.55127	6.25167	5.37389	10.3188	5.46527	7.02612	9.79151	5.57105	5.51339	10.5906	5.67731	6.42247	9.15602	5.8198	4.72405
ENSG00000176393	RNPEP	22.1195	21.6707	26.8917	35.8915	20.8847	26.1185	33.4767	22.7863	31.7718	30.3029	21.218	27.0701	29.5107	24.7488	26.4032	30.2989	24.3834	27.9297	31.6424
ENSG00000176399	DMRTA1	1.39275	1.20694	0.506421	0.432399	1.17605	0.466874	0.394938	0.958226	0.614297	1.04901	0.759372	0.354222	0.610743	1.27334	0.838406	1.40114	1.02882	0.43531	0.312156
ENSG00000083635	NUFIP1	4.7282	5.09797	2.17989	1.40261	4.86435	2.0945	1.33237	4.54257	1.62215	2.91689	4.07499	1.59709	1.72978	4.67614	2.17983	2.45399	3.90897	1.52914	1.63081
ENSG00000147873	IFNA5	0	0	0	0	0	0.052527	0	0	0.057136	0.050115	0	0.052152	0.047833	0	0.098105	0.106926	0	0	0
ENSG00000167531	LALBA	0	0	0	0	0	0	0	0	0	0	0	0	0	0	0	0	0	0	0
ENSG00000167536	DHRS13	4.22168	2.34156	2.93659	1.67523	4.05113	3.04827	1.86521	6.1552	3.57775	4.37175	6.24984	2.4197	2.72206	4.1482	3.88054	4.48263	6.05616	2.45432	2.22535
ENSG00000167535	CACNB3	15.1202	18.4198	13.5524	10.8352	16.2952	12.1444	11.8281	17.2295	10.7192	11.9934	16.7177	10.6644	9.40962	16.3541	12.808	15.0918	19.414	9.65936	10.0129
ENSG00000188886	ASTL	0.238424	0.099991	0.938201	0.445571	0.291897	1.1501	1.00801	0.605317	1.2764	1.05299	0.60566	2.56284	1.91751	0.443135	2.79618	1.03507	1.07199	2.26159	1.78599
ENSG00000188883	KLRG2	0.033659	0.063405	0.072038	0.051138	0.078463	0.047512	0	0	0.077005	0.101238	0.149692	0	0	0.065181	0.022836	0.102157	0.025063	0.030312	0.016268
ENSG00000094796	KRT31	0	0	0	0	0.029625	0	0	0	0.069962	0.030992	0.022654	0	0.03035	0.032187	0.079111	0	0	0	0.02909
ENSG00000237289	CKMT1B	3.90181	3.692	4.37084	5.56331	2.68269	5.00446	5.12777	6.14093	5.95338	6.00107	5.58092	6.26592	6.46236	4.52559	5.58877	5.38123	4.47847	5.67779	7.71016
Human_newGene_1289	Human_newGene_1289	0.2333	0.067109	0	0.07708	0.05677	0.075096	0.085101	0.104915	0.202855	0.067849	0.072335	0.214416	0.201589	0.14783	0.133308	0.701799	0.114416	0.178109	0.179252
ENSG00000153207	AHCTF1	11.1825	8.64941	3.07297	2.45291	7.0915	3.06006	1.82912	9.59704	2.20286	6.30331	9.18065	2.71994	2.72525	10.1134	3.58177	6.35882	7.78045	1.65381	2.40129
Human_newGene_27301	Human_newGene_27301	0.098899	0	0.345115	0.607802	0	0.55498	0.230625	0.223156	0.384964	0.392178	0	0.623767	0.76173	0.133778	0.489722	0.781806	0.0383	0.579895	0.629511
ENSG00000049192	ADAMTS6	6.62955	5.90547	1.71705	1.40264	5.25595	1.57104	1.13915	5.47656	0.661018	1.4184	5.15392	0.836765	0.917689	5.53679	0.748464	1.31577	5.19692	0.749957	0.802668
ENSG00000101323	HAO1	0	0	0	0	0	0	0	0	0	0	0	0	0	0	0	0	0	0	0
ENSG00000237136	C4orf51	0.115982	0	0.110625	0.210957	0.088957	0.075531	0.135044	0.288517	0.301734	0.053176	0.051244	0.113958	0.242345	0.216617	0.193525	0.141545	0.332973	0.178592	0.284212
ENSG00000177042	TMEM80	11.3951	10.3903	8.41496	6.84448	11.7201	8.14298	6.81622	8.70608	8.3787	11.5172	8.26497	6.18135	7.16551	8.10234	9.84161	12.6132	8.26474	6.25552	6.77319
ENSG00000177047	IFNW1	0	0	0	0	0	0	0	0.053156	0	0	0	0	0	0	0.051937	0	0	0	0
ENSG00000129566	TEP1	11.1532	11.3286	8.35111	8.32893	12.344	7.82521	8.97187	11.0293	9.21944	10.3018	12.4662	8.45669	8.0473	11.4592	10.8113	11.7027	12.3599	7.34444	8.65426
ENSG00000177045	SIX5	2.04095	4.06051	1.38002	0.898796	3.16493	2.00873	0.951305	3.77486	2.94455	2.1003	4.34437	1.44475	1.39698	2.39309	2.64241	3.46779	3.06141	1.48776	1.00937
ENSG00000154252	GAL3ST2	0.02834	0.100154	0	0	0.018484	0	0	0.048879	0	0.072209	0.096593	0.032824	0.071148	0.217473	0.020361	0.068673	0.065671	0	0.106928
ENSG00000141232	TOB1	6.59459	7.5241	17.205	27.7297	7.19222	29.9937	42.9071	6.22657	22.3568	39.0087	7.8801	47.8228	70.0857	7.40066	23.386	41.2293	7.54723	46.5846	81.0211
ENSG00000277556	OR13C5	0	0	0	0	0	0	0	0	0	0	0	0	0	0	0	0	0	0	0
ENSG00000172673	THEMIS	0	0	0	0	0	0	0	0	0	0	0	0	0	0	0	0	0	0	0
Human_newGene_19983	Human_newGene_19983	0.752403	0.512803	0.065195	0.167277	0.532337	0.116372	0.156213	0	0.044926	0.06004	0.133917	0.109909	0.109935	0.063732	0.182401	0.104582	0.128888	0	0.18521
ENSG00000172671	ZFAND4	3.64635	3.68723	1.02289	1.81143	3.28902	1.74294	1.20302	4.56584	1.52525	3.13726	4.63392	1.82421	2.3976	4.24034	2.38967	3.46254	4.1465	1.39614	1.57243
Human_newGene_19981	Human_newGene_19981	0.500014	0.596169	0.116856	0.148275	0.647839	0.265258	0.079783	0.209	0.044292	0.041306	0.087559	0.078507	0	0.139326	0.125885	0	0.102051	0.110672	0.049579
Human_newGene_19986	Human_newGene_19986	0	0	0	0	0	0	0.26137	0	0	0.450314	0.109554	0	0	0.190349	0.254474	0.162671	0	0	0
ENSG00000236424	TSPY10	0	0	0	0	0	0	0	0	0	0	0	0	0	0	0	0	0	0	0
ENSG00000136750	GAD2	0.016062	0.07276	0.008418	0.046634	0.070036	0.021071	0.039814	0.043828	0.028239	0.106554	0.008582	0	0.026091	0.078778	0.03423	0.038972	0.046998	0.007479	0.007925
ENSG00000136754	ABI1	16.4919	17.1308	13.9147	9.64691	16.4449	13.5916	9.09732	16.8624	9.52277	12.3843	16.7465	9.69094	9.51137	16.9004	10.859	12.164	17.3512	9.92718	8.28339
ENSG00000136758	YME1L1	41.1374	39.1229	38.8572	33.0912	41.3543	39.0474	34.8801	40.6853	30.5815	32.5842	39.751	34.9189	28.8084	41.1318	33.2786	32.2983	37.0974	33.6303	31.793
ENSG00000116014	KISS1R	0	0	0	0	0	0.064236	0.116657	0	0.034241	0.027496	0	0.033677	0.08937	0	0.092623	0.081709	0.033885	0	0.068379
ENSG00000116017	ARID3A	3.14925	3.69861	0.575607	0.840254	3.02521	0.668276	0.735783	3.01777	0.962521	2.45389	3.34195	0.40176	1.16813	3.67361	1.41956	2.8286	3.21748	0.539694	0.574618
ENSG00000116016	EPAS1	9.82389	10.7313	7.14521	10.9093	9.76949	6.25821	8.83263	21.9821	12.9307	24.805	21.6844	12.357	29.636	23.5158	14.7945	25.6457	23.5966	13.5455	20.5293
Human_newGene_41590	Human_newGene_41590	0.769139	0.62767	1.51683	0.169484	0.627915	0.36901	0.211944	0.659506	0.30745	0.535902	0.577265	0.54566	0.245373	0.73983	0.41477	0.397963	0.622836	0.400819	0.184114
ENSG00000197674	OR51C1P	0	0	0	0	0	0	0	0	0	0	0	0	0	0	0	0	0	0	0
Human_newGene_10586	Human_newGene_10586	0.144513	0	0.282038	0.310405	0.436116	0.229462	0.307586	0.223565	0.414407	0.419656	0.268838	0	0	0.045243	0.296912	0.294879	0.205496	0.205586	0.089379
Human_newGene_10583	Human_newGene_10583	0.083665	0.0361	0.171061	0.129857	0.076242	0.077291	0.093387	0.2068	0.103301	0.133867	0.075746	0.176893	0.144674	0	0	0.35478	0.063163	0.361337	0.24687
Human_newGene_13588	Human_newGene_13588	5.62425	6.1745	1.57206	1.54027	6.16376	2.20951	2.78438	6.59322	4.08974	5.90212	4.85813	5.05815	3.74546	4.8416	4.25633	4.48261	6.22195	3.94608	5.67295
Human_newGene_13589	Human_newGene_13589	6.50348	6.97546	2.14881	2.49599	10.4114	3.0239	2.54858	6.60307	2.20229	3.18284	8.77258	2.22894	1.79182	6.7725	2.48865	3.00414	8.19419	1.94911	1.83546
ENSG00000249156	TAF11L12	1.62673	0.821362	0.265338	0.1783	1.1118	0.489458	0.256948	0.577204	0.248795	0.375521	0.253617	0.178362	0.462176	0.366395	0.387796	0.349522	0.446375	0.106416	0.646912
ENSG00000248919	ATP5MF-PTCD1	0.083129	0.047293	0	0	0	0.05327	0	0	0	0	0.042773	0	0	0.042486	0.121259	0.068447	0	0	0
Human_newGene_17608	Human_newGene_17608	2.71881	1.69055	0	0	1.15562	0.730465	0.279866	1.98006	1.82464	1.22844	2.37588	0.487138	0.529557	2.88131	1.0873	2.94523	2.3141	0.509302	0.748892
Human_newGene_41598	Human_newGene_41598	1.07564	0.856871	0.986601	0.767669	1.03122	1.09982	1.20951	0.692938	1.04953	0.747887	0.748831	1.18404	1.2313	0.74884	0.734019	0.896532	0.879128	1.0096	0.604577
Human_newGene_44702	Human_newGene_44702	0.281691	0.063949	0.251347	0.494339	0.710229	0.40389	0	0.618945	0	0	0.303317	0.080053	0.074215	0.128726	0	0	0.466061	0	0
ENSG00000242866	STRC	0.0098	0	0	0.044712	0	0	0.010724	0.026969	0.014773	0	0	0	0.049885	0.02782	0.010863	0.031565	0.013542	0	0.016837
ENSG00000158555	GDPD5	9.75657	11.4631	9.86031	11.4787	11.2619	9.25724	12.4148	8.45998	6.14499	7.53443	8.78793	5.66703	7.0431	8.66044	5.87316	7.66186	8.46944	6.1348	6.32235
ENSG00000276203	ANKRD20A3	0.185151	0.133913	0.077997	0.046209	0.151632	0.113748	0.089507	0.436933	0.138566	0.271803	0.721774	0.263199	0.118565	0.496582	0.258274	0.212511	0.88959	0.250193	0.105706
ENSG00000174099	MSRB3	3.24322	10.4563	8.14743	4.36146	5.63922	7.47891	6.96953	5.14357	2.99256	5.44114	8.73925	6.62839	6.56117	3.70664	3.21249	2.63328	8.72345	5.42431	3.46591
ENSG00000137409	MTCH1	105.15	105.886	131.425	121.086	96.4414	122.805	128.01	94.1426	105.272	95.9836	96.0445	100.58	116.78	94.6664	101.445	97.4243	99.9844	103.302	108.706
ENSG00000137404	NRM	11.6998	11.2011	10.6868	9.30824	9.91131	10.9962	8.61906	9.66536	10.5136	8.15138	8.8192	9.11564	7.20529	9.11967	11.0732	9.6738	11.8499	7.87635	6.65722
ENSG00000235194	PPP1R3E	0.614518	0.549651	0.412376	0.601598	0.57378	0.642871	0.343736	0.694272	0.546467	0.411931	0.551889	0.395041	0.409628	0.539544	0.925603	0.54142	0.454072	0.690313	0.35414
ENSG00000275572	GRIFIN	0	0	0	0	0	0	0	0	0	0	0	0	0	0	0	0	0	0	0
ENSG00000060138	YBX3	109.347	111.683	94.5206	66.9464	108.959	92.6187	69.778	113.678	90.1849	99.9094	113.194	81.3623	89.8422	116.14	87.4333	92.6355	118.425	82.0211	65.6682
ENSG00000281593	AC006978.2	0.293727	0	0.063994	0	0.081329	0	0	0	0.137225	0.189543	0	0	0	0.06047	0.331948	0.096268	0.0516	0.066556	0.046522
ENSG00000044012	GUCA2B	0	0	0	0	0	0	0	0	0	0	0	0	0.104074	0	0	0	0	0	0
ENSG00000130758	MAP3K10	3.02448	3.21992	2.19392	1.66752	3.38453	2.7509	1.11596	2.94164	2.12194	2.52481	3.18046	1.54333	1.89272	2.63269	2.27318	2.26131	3.37449	2.19371	1.27395
ENSG00000231852	CYP21A2	0	0	0	0	0	0	0	0	0	0.022669	0	0	0.034945	0	0.057483	0	0	0	0
ENSG00000130751	NPAS1	0.601484	0.532042	0.901572	0.266845	0.367066	0.197065	0.252654	0.537441	0.735155	0.404761	0.875423	0.670188	0.644275	1.08061	0.683124	0.480296	0.950627	0.472583	0.460981
ENSG00000130755	GMFG	2.22112	1.97526	3.23486	6.00233	2.38142	4.31365	5.50394	4.624	5.93135	9.07246	4.58043	8.33896	8.55502	5.13171	7.07484	8.86382	6.503	8.10166	7.92179
ENSG00000186115	CYP4F2	0.022155	0.058132	0	0.123499	0.102242	0.108417	0	0.154078	0.206526	0.198727	0.25026	0.04277	0.201355	0.180468	0.172348	0.042457	0.256983	0.083079	0.168191
ENSG00000110756	HPS5	5.19825	6.046	3.38649	3.75194	5.15016	3.71193	2.72163	5.13703	2.52501	3.3728	5.80014	3.08906	2.17054	6.25048	2.92563	3.57576	5.06235	3.25527	2.56528
ENSG00000134278	SPIRE1	3.41038	3.33172	1.2052	0.979542	3.16047	1.38744	0.658962	3.64036	0.988477	2.09703	3.16658	0.80209	1.31464	2.96744	1.36101	2.48991	3.05995	0.968984	0.7882
ENSG00000068120	COASY	38.3077	36.5359	46.5581	34.2885	36.3876	43.9482	33.0279	26.3691	29.8735	22.8533	27.0484	33.4082	31.1657	23.0615	28.144	26.5813	26.9592	33.9854	28.1636
ENSG00000064726	BTBD1	31.2774	29.078	29.2908	34.3689	28.8369	29.9768	32.0875	29.7099	29.4292	34.0022	30.1988	30.1093	29.2982	30.8135	30.9099	30.902	29.5652	27.9924	34.3654
Human_newGene_32945	Human_newGene_32945	0.131463	0.085737	0	0.051058	0.269399	0	0	0.752406	0.099979	0.18185	1.69558	0.173052	0.12383	0.912315	0.287438	0.225794	1.54775	0.109566	0.106521
Human_newGene_32941	Human_newGene_32941	0	0.00706	0	0.019853	0	0.060061	0.053749	0	0.009965	0.021729	0.008884	0.005254	0.021178	0	0	0.330001	0	0.044105	0.125602
Human_newGene_32942	Human_newGene_32942	3.28725	2.4898	1.65224	1.22155	3.11842	2.05145	1.16996	2.29223	2.79244	2.24889	2.18381	2.07988	1.42584	2.51432	2.76	2.18305	2.34523	2.31622	1.35708
ENSG00000072506	HSD17B10	81.7016	87.3724	121.613	105.612	80.3491	119.485	108.865	64.2239	85.7701	73.7437	68.2825	92.4382	74.597	60.4148	79.6131	67.0612	71.9286	86.7811	75.8088
ENSG00000181135	ZNF707	7.88262	4.62909	2.9791	4.99685	5.71657	3.89564	4.66606	6.10433	4.49148	5.99597	3.08033	3.1646	4.54485	6.3739	4.75755	10.8295	3.24836	3.58648	4.12841
ENSG00000134183	GNAT2	0.100238	0.139109	0.236528	0.041813	0.234584	0.058207	0.346596	0.314468	0.126208	0	0.080617	0.115327	0.057073	0.115095	0	0.020843	0.16449	0.017707	0.209079
ENSG00000134186	PRPF38B	34.4861	33.2609	13.8472	13.0127	32.5942	15.7774	10.2166	29.8592	11.3429	22.441	32.4561	11.6084	15.2593	42.9312	15.1113	20.7123	28.4819	11.3861	13.1701
ENSG00000134184	GSTM1	0	0.020087	0.237042	0.060159	0.207445	0	0.09917	0.076515	0.249165	0.467094	0.163149	0.11084	0.401399	0	0.073535	0.022725	0.349908	0.524551	0.039989
Human_newGene_22474	Human_newGene_22474	0.211609	0.22372	0.23922	0.452492	0.251783	0.375113	0.288935	0.149968	0.201955	0.295445	0.223699	0.3013	0.30619	0.14543	0.226401	0.169138	0.192173	0.349498	0.360394
Human_newGene_22477	Human_newGene_22477	0.725947	0.169999	0.400779	0.208194	0.28931	0.529031	0.733865	0.285612	0.287405	0.57924	0.146703	0.305263	0.228032	0.330263	0.293446	0.650559	0.395356	0.643194	0.283019
Human_newGene_34398	Human_newGene_34398	0.359136	0.245849	0.501659	0.423004	0.318459	0.196505	0.088198	0.649854	0	0.408966	0.205214	0	0.076728	0.346599	0	0.380129	0.287312	0.104131	0.171772
ENSG00000037042	TUBG2	5.91125	6.80956	7.29732	6.12245	4.94266	7.51008	6.37408	6.08364	8.82268	5.99184	6.54832	6.21141	6.35553	5.21896	7.00006	6.59797	6.49066	7.37887	5.57248
ENSG00000078487	ZCWPW1	0.476797	0.700059	0.670153	0.641886	0.517449	0.364087	0.536482	0.396527	0.484248	0.510058	0.278598	0.446681	0.360401	0.938317	0.512457	0.331465	0.763069	0.497817	0.53034
ENSG00000042753	AP2S1	75.9164	79.221	137.416	126.404	65.1921	109.726	123.55	67.9482	122.617	63.8653	56.0415	107.317	86.8713	57.2827	97.3854	61.3604	52.7999	97.1594	64.7721
Human_newGene_32495	Human_newGene_32495	0.186752	0.209711	0	0.039119	0.050774	0.032388	0.247124	0.089396	0.235628	0.230782	0.236427	0.178272	0.141914	0.211544	0.192392	0.161072	0.613516	0.03113	0.032331
Human_newGene_32492	Human_newGene_32492	0.372971	0.476644	0.315863	0.170857	0.576037	0.183769	0.135447	1.32432	0.365482	0.680986	0.771661	0.455336	0.451854	0.606385	0.867462	0.80326	1.07125	0.299252	0.394249
ENSG00000105855	ITGB8	0.797287	0.833343	0.30085	0.403377	0.839888	0.368871	0.237817	0.652972	0.482621	0.691423	0.69775	0.218109	0.312083	0.781223	0.735136	0.69448	0.705155	0.277715	0.260512
ENSG00000105854	PON2	16.2205	18.1774	24.5525	25.155	15.1647	23.129	30.0254	17.5267	25.0388	24.3997	15.3454	24.0306	27.7756	17.8258	24.9187	28.3875	16.3601	23.0995	30.1519
ENSG00000111481	COPZ1	69.4731	72.4446	120.315	60.5283	70.2092	97.3473	97.473	72.5935	73.3823	57.1935	68.8797	69.3593	53.6187	66.0973	63.5183	66.9011	55.1348	75.5903	65.8674
ENSG00000105856	HBP1	5.84587	5.67614	2.05912	1.8247	5.26657	2.07514	2.01128	6.33442	4.38192	5.74126	8.22399	2.13069	5.38704	7.89817	4.63396	6.13771	8.15109	3.31863	2.78191
ENSG00000105851	PIK3CG	0	0	0	0	0	0	0	0	0	0.026403	0	0	0.009475	0	0	0	0.01024	0	0
ENSG00000079689	SCGN	0.037352	0	0	0	0	0	0	0	0.038973	0.032548	0	0	0	0	0	0	0	0.030894	0
ENSG00000105852	PON3	0.210532	0.43763	0.357417	0.539632	0	0.561778	0.259427	0.280935	0.319648	0.686963	0.442677	0.661994	0.671763	0.381716	0.510396	0.648577	0.384251	0.561906	0.971345
ENSG00000142252	GEMIN7	13.8299	11.0101	1.33401	1.40767	11.3675	2.5847	0.646777	8.25475	2.27656	5.04837	9.98604	1.05387	2.65838	9.07939	2.56316	5.91252	8.81686	1.16841	1.18146
ENSG00000012174	MBTPS2	3.95098	3.63619	2.41059	1.77652	3.8366	2.34414	1.81207	4.04843	2.44112	2.50066	3.52052	2.23481	1.52587	4.21881	2.6963	2.44132	3.94988	2.38423	1.6715
ENSG00000012171	SEMA3B	1.49782	2.09254	2.20531	1.89438	1.57479	2.31988	1.67236	3.44241	5.73599	4.34134	3.68121	5.66184	4.59436	3.42893	4.4676	4.59823	3.97481	6.22064	3.9846
ENSG00000135587	SMPD2	4.92006	4.50061	7.40094	6.59327	4.69386	6.99533	7.49723	3.70125	5.8349	3.73982	3.95417	5.26485	4.45159	4.31554	4.2133	4.70521	4.07513	5.11062	4.28957
ENSG00000174498	IGDCC3	0.012067	0.077408	0.033667	0.008162	0.043545	0.01325	0	0.079372	0.024689	0.208351	0.088009	0	0.052703	0.153725	0.08808	0.082311	0.219118	0.029942	0.031097
ENSG00000071082	RPL31	330.4	278.304	605.436	783.506	350.937	711.124	904.102	530.446	1005.1	953.22	478.18	1045.02	1204.63	502.88	932.793	1009.36	443.381	1133.7	1350.78
ENSG00000124490	CRISP2	0	0	0	0	0	0	0	0.136862	0.184829	0.161941	0.083563	0.1035	0.10153	0.051646	0.134572	0.035367	0.038781	0.11765	0.045847
ENSG00000139780	METTL21C	0	0	0	0	0	0	0	0	0	0	0	0	0	0	0	0	0	0	0
ENSG00000180660	MAB21L1	0.135833	0.168614	0.09598	0.150703	0.235852	0.155127	0.156001	0.201349	0.381296	0.411322	0.149424	0.152428	0.310876	0.261718	0.557217	0.399244	0.164632	0.177158	0.228611
ENSG00000135638	EMX1	0.482015	1.10162	0.617523	0.60385	0.847971	0.953535	0.049475	1.06648	0.706957	0.619073	1.36821	0.58654	0.520308	1.14308	0.84338	0.980849	1.1085	0.944818	0.356965
ENSG00000180667	YOD1	6.21014	5.90594	2.36543	2.23558	6.71147	3.58254	1.89788	5.95986	4.59906	4.93837	6.32221	4.12174	3.51367	5.334	5.65661	5.01503	6.05141	4.07593	3.45999
ENSG00000188419	CHM	6.70304	6.53185	4.66845	3.59508	6.05613	4.30444	3.75043	7.64546	4.02487	3.93619	6.23942	4.00604	2.94441	7.02222	4.50244	4.03833	6.09596	4.03689	3.09487
ENSG00000135632	SMYD5	37.9649	37.6019	38.5853	26.7322	38.7283	37.5751	26.2465	29.5648	23.4231	22.1623	29.2536	25.3475	20.5959	29.2704	21.8847	21.3591	30.6596	24.7838	19.6003
ENSG00000135631	RAB11FIP5	16.899	11.3301	6.46909	5.54329	17.9861	6.79266	4.7579	16.9711	7.27399	13.8758	17.8815	4.54469	9.05226	15.9053	9.27808	15.2471	17.5209	5.74941	5.63895
ENSG00000135636	DYSF	2.38478	2.11802	2.0962	2.73579	2.56204	2.06011	2.88583	2.5554	2.2574	1.78995	2.38386	2.51153	2.02687	2.40587	2.01449	1.86689	2.27579	2.53141	2.20389
ENSG00000135637	CCDC142	7.04112	3.90619	2.08445	2.06898	3.51929	1.66705	1.18117	3.04914	2.03192	3.61782	2.849	10.7798	1.89613	2.45221	2.96052	3.64434	2.4655	1.00811	1.42349
ENSG00000147155	EBP	17.9006	18.4983	23.0397	17.5049	20.4663	21.2724	19.1979	17.5211	17.5529	13.0169	20.1375	17.7406	12.5381	17.2574	17.8421	12.2794	17.9521	17.7881	13.2771
ENSG00000114503	NCBP2	43.3461	32.0378	48.2644	38.2639	43.8911	46.4132	29.713	33.2868	43.8134	40.9927	31.7539	50.629	33.5705	31.902	40.5915	41.8485	45.9923	47.6161	42.8281
ENSG00000115677	HDLBP	130.367	135.949	149.26	135.615	129.812	124.498	135.289	121.572	125.056	106.517	123.471	119.557	99.5468	121.174	123.709	111.918	118.552	126.121	115.958
Human_newGene_39148	Human_newGene_39148	0.322959	0.415151	0.165229	0.065561	0.37189	0.613821	0	0.507165	0.542717	0.157324	0.774923	0.309573	0.435578	0.927671	0.394674	0.091776	0.268777	0.712566	0.244953
ENSG00000116852	KIF21B	1.74792	1.2255	0.243766	0.770916	1.75377	0.448146	0.456371	2.01232	0.664552	2.32519	2.43736	0.342674	0.959185	2.29826	1.29303	2.79773	2.83184	0.3889	1.14279
Human_newGene_46619	Human_newGene_46619	0.027262	0	0.128848	0.388561	0	0.466684	0.525994	0	0	0	0	0	0.424882	0	0.040232	0	0.269874	0.115387	0
Human_newGene_39140	Human_newGene_39140	0	0	0	0	0.681247	0	0	0.3114	0	0	0	0	0.177297	0	0	0	0	0.060917	0
Human_newGene_46612	Human_newGene_46612	0.063512	0.108834	0.196142	0	0.254806	0.278454	0.262653	0.53431	0.302919	0.241111	0.117597	0.27164	0.236799	0.172594	0.260995	0.234067	0.128802	0.27419	0.223166
Human_newGene_31379	Human_newGene_31379	0	0	0	0.27719	0	0	0	0	0	0	0	0	0.456925	0	0	0	0	0	0.15672
ENSG00000029364	SLC39A9	25.9382	25.5153	13.5923	10.9376	23.7932	15.0516	6.96787	26.3503	9.37599	12.5622	32.2563	8.77641	11.7171	20.5689	10.5357	12.0498	18.7684	8.54265	6.77263
ENSG00000105143	SLC1A6	0.478576	1.02946	0.674975	0.623754	0.67083	0.603672	0.531471	1.45956	1.52873	0.787898	1.50641	1.26883	0.788241	0.863917	0.940512	0.848808	1.41479	0.945589	0.628565
ENSG00000105141	CASP14	0	0	0	0	0	0.016157	0	0	0.017052	0	0	0	0.015667	0.01585	0.023168	0	0.033979	0.013793	0.02865
ENSG00000105146	AURKC	6.84474	7.33087	11.1496	7.44173	7.45497	10.9414	7.40449	8.81521	11.2998	9.13649	7.82292	12.7258	8.99964	8.09259	11.9382	7.66173	9.30459	11.0452	8.88451
ENSG00000267631	CGB1	3.16962	3.71346	5.18702	6.08786	4.87905	6.73112	7.13422	3.93898	8.90232	5.94967	3.24639	9.32417	9.24146	4.66395	2.31673	6.24826	4.75572	9.28314	9.89908
ENSG00000142920	AZIN2	3.66604	3.69985	2.15305	1.21614	3.87152	2.58365	1.27687	3.49635	1.54973	1.83051	4.07812	1.62628	1.68639	2.70902	1.58001	2.22494	3.5423	1.37677	0.936169
ENSG00000235942	LCE6A	0	0	0	0	0	0	0	0	0	0	0	0	0	0	0	0	0	0	0
ENSG00000146205	ANO7	0.775361	0.263801	0.350585	0.33929	0.842515	0.490188	0.254028	0.884763	0.857892	0.63594	1.01633	0.386256	0.325582	0.727134	0.12472	1.11392	0.790462	0.367542	0.324848
ENSG00000164418	GRIK2	0	0.009478	0	0	0	0	0	0.051798	0.022919	0	0.043398	0	0	0.10551	0.010127	0.049336	0.022341	0	0
ENSG00000164411	GJB7	0	0	0.016308	0	0	0.037245	0	0.021466	0	0	0	0.023926	0	0	0	0	0	0	0.017965
ENSG00000164414	SLC35A1	4.7042	3.52558	1.77921	0.962196	4.34919	2.55968	0.905337	4.01734	1.60876	2.91235	4.44497	1.2467	2.11427	5.52758	3.04401	3.7376	4.32148	1.44324	1.65481
ENSG00000100532	CGRRF1	5.99422	5.78369	4.62777	2.39064	6.33921	3.7236	2.37731	6.80739	2.78077	3.6174	5.88691	2.93607	2.79496	6.19843	2.47354	3.5461	6.30198	2.94843	2.80223
ENSG00000077454	LRCH4	10.1992	10.3889	11.037	7.00056	10.8605	10.5206	7.74644	9.54977	6.4982	7.33426	9.81979	9.6502	9.31262	8.51788	6.42466	6.36548	8.44091	9.34182	6.9545
ENSG00000077458	FAM76B	4.9647	6.57703	1.21715	1.4067	6.23186	1.41669	1.05132	6.49678	2.57715	3.21665	6.86725	2.16958	1.7801	4.05823	3.54358	2.78639	4.8489	1.64703	2.03592
ENSG00000212658	KRTAP29-1	0	0	0	0	0	0	0	0	0.054965	0	0	0	0.049656	0	0.0489	0	0	0	0
ENSG00000212659	KRTAP9-6	0	0	0	0	0	0	0	0	0	0	0	0	0	0	0	0	0	0	0
ENSG00000152056	AP1S3	5.06902	6.6893	2.97179	3.03525	5.9399	2.80981	1.77566	6.50361	2.8231	4.43426	4.87318	1.70219	1.68254	6.6541	2.12467	3.5232	5.12043	2.58661	2.5386
ENSG00000212657	KRTAP16-1	0	0	0	0	0	0	0	0	0	0	0	0	0	0	0	0	0	0	0
ENSG00000021300	PLEKHB1	1.56846	1.56814	4.2826	3.40096	3.03082	4.36063	6.47659	2.42208	6.02427	3.15672	2.51518	6.83837	5.90406	2.92399	4.20906	6.29469	3.43654	4.44809	5.37817
Human_newGene_36803	Human_newGene_36803	0.427918	0.269404	0	0	0.19872	0.031824	0.036064	0.22779	0.021395	0.23298	0.332657	0.062331	0	0.450583	0.340694	0.211503	0.220604	0.086903	0.074073
ENSG00000100399	CHADL	0.021521	0	0.033811	0	0.049378	0.044742	0.02335	0.018462	0.044453	0.037488	0.05672	0.140203	0.0914	0.017226	0.028103	0	0.027744	0.017236	0.033908
ENSG00000100393	EP300	21.2165	22.7271	3.36089	4.76662	22.5029	4.63471	3.12638	22.0876	5.03531	9.18416	21.2857	2.99346	4.45108	21.9102	7.42452	9.84133	21.1418	3.55267	4.19044
ENSG00000100395	L3MBTL2	12.2161	14.272	6.43941	4.2042	12.5962	6.79541	3.56799	11.6137	5.39908	6.92759	11.407	4.78047	5.07759	11.0005	5.85928	5.85954	10.0619	4.23437	3.86557
ENSG00000253148	RGS21	0	0	0	0	0	0	0	0	0	0	0	0	0	0	0	0	0	0	0
Human_newGene_30406	Human_newGene_30406	0.073072	0	0	0	0.16758	0.20162	0	0	0.088973	0.160867	0	0.083099	0.40357	0.142857	0.385794	0	0	0.212423	0
Human_newGene_40127	Human_newGene_40127	0.827327	0.565082	0.285287	0.304368	0.601432	0.372309	0.273538	0.525625	0.269551	0.473556	0.442061	0.177311	0.084899	0.966789	0.524484	0.564665	0.464916	0.20062	0.225654
Human_newGene_40125	Human_newGene_40125	3.89204	5.02275	3.77539	3.14701	4.58405	3.33972	3.19026	3.07123	2.32694	2.91385	2.95949	2.23221	1.4285	4.30176	2.85978	2.51527	3.54645	1.93446	1.56871
Human_newGene_40122	Human_newGene_40122	0.329691	0.443377	0.222698	0.689977	0.537094	0.272718	0.230508	0.772031	0.500559	0.472931	0.447943	0.348118	0.485312	0.65835	0.578423	0.594897	0.894918	0.203035	0.60979
ENSG00000196550	FAM72A	6.83153	6.2093	3.25808	2.13898	7.70999	3.86236	2.26915	6.12695	1.80339	4.64073	7.62419	2.83011	2.98198	5.69154	1.76855	3.51379	7.59582	3.38669	1.99613
ENSG00000196553	CCDC196	0.049804	0.052734	0	0	0	0	0	0.013597	0	0	0	0	0.009993	0	0	0	0.017311	0	0
ENSG00000196557	CACNA1H	8.58637	9.64894	9.54253	12.4641	9.79517	10.2232	11.1163	10.8218	9.5025	9.13882	10.867	11.0308	8.55966	11.6738	10.3524	7.9213	13.496	10.9156	8.61704
ENSG00000197208	SLC22A4	3.05141	2.20513	1.82205	1.27347	3.29405	1.7664	1.18892	1.19753	1.16675	1.39242	1.42735	0.839885	1.23646	1.09167	1.16191	1.30872	1.19408	1.26319	1.01207
ENSG00000151292	CSNK1G3	23.9405	22.8602	9.95711	7.31067	23.1581	10.4048	6.16562	24.1523	7.42159	13.386	23.4097	6.59603	7.83924	27.2912	11.8418	12.2319	22.9776	7.46138	6.00126
ENSG00000113141	IK	69.5004	66.07	81.1294	65.6558	69.5693	104.156	83.9361	63.5608	65.2618	61.3317	68.3301	94.2899	63.6275	69.9624	70.5849	69.0109	65.9929	76.096	61.1468
Human_newGene_15032	Human_newGene_15032	0.331398	0.408662	6.21249	3.42741	0.654851	6.31907	3.5221	0.541779	4.64513	3.60298	0.725393	5.70293	4.76005	0.515753	7.18127	6.51959	0.34644	6.5984	3.51696
Human_newGene_41834	Human_newGene_41834	0.204946	0.24437	0	0	0	0	0	0	0	0.045399	0	0	0	0	0	0	0.5372	0.109032	0
Human_newGene_41839	Human_newGene_41839	0	0	0.169812	0	0.089877	0	0	0.187405	0.092274	0	0	0	0	0.271228	0.132752	0	0.10048	0.326299	0.169161
Human_newGene_41838	Human_newGene_41838	0.621239	0.067013	0.156239	0.079097	0.278342	0	0.084978	0	0	0	0	0	0	0	0.137442	0	0	0	0.085623
ENSG00000026652	AGPAT4	3.5011	4.01163	1.06421	1.01118	3.77334	1.02206	1.24539	4.57815	1.47601	3.08885	4.1322	1.46263	1.28774	3.84347	2.1861	3.3381	4.4351	1.14908	0.891759
Human_newGene_43475	Human_newGene_43475	0	0.292244	0.236121	0.278978	0.145489	0	0.342339	0.141264	0.309362	0.406442	0.138413	0.177872	0.049367	0.600042	0.441249	0.135316	0.250725	0.108292	0.205691
ENSG00000185158	LRRC37B	1.66619	2.19402	1.06727	0.721508	1.10792	0.943584	0.939425	1.4517	1.50583	1.42349	1.6833	0.921943	1.47254	1.47298	1.0833	0.963402	1.58636	0.868862	1.01074
ENSG00000185155	MIXL1	0	0	0	0.028017	0	0.026031	0	0	0	0	0	0.025549	0	0	0	0	0	0	0
ENSG00000185156	MFSD6L	0	0	0	0	0	0	0	0	0	0.022531	0	0	0	0	0	0	0	0	0
ENSG00000106635	BCL7B	16.5222	17.2964	9.59253	6.12016	18.978	9.2693	6.09726	20.6119	7.61143	8.90744	18.469	5.5235	9.21732	16.878	7.57665	8.41567	14.7228	7.85895	7.38342
ENSG00000106636	YKT6	85.159	85.5771	85.4255	63.7437	84.3512	88.297	73.9649	68.4141	56.6466	63.4416	73.8894	58.8252	70.8678	69.5293	69.5809	63.0339	77.6472	62.2746	70.5509
ENSG00000106631	MYL7	0	0.060793	0.142168	0.189073	0	0	0	0.064917	0.139261	0.178725	0	0	0.307076	0	0.034079	0.094217	0	0	0.079784
ENSG00000106633	GCK	0.029708	0.017091	0.077498	0.032966	0.043417	0.057117	0.043346	0.610887	0.039603	0.110217	0.597828	0.028293	0.078264	0.563081	0.300639	0.09668	0.119024	0.080145	0.210948
ENSG00000106638	TBL2	10.6483	11.1905	8.91495	5.68619	7.62444	7.1479	4.93906	9.03276	5.7543	5.44866	11.4765	8.11728	6.08916	8.46387	6.79529	8.94018	8.56517	5.42528	6.20586
ENSG00000123584	MAGEA9	0.074338	0	0.214767	0.3185	0.261512	0	0.380847	0	0.425231	0	0	0.318332	0.597051	0	0.292664	0.311788	0	0.348579	0
ENSG00000152670	DDX4	0	0	0	0	0	0	0	0	0	0	0.017432	0	0.017665	0	0	0.018297	0	0	0
ENSG00000152672	CLEC4F	0.020527	0.195776	0.085309	0.157008	0.184821	0.041721	0	0.089902	0.112635	0.14543	0.243643	0.056275	0.039026	0.109163	0.187121	0.163146	0.180031	0.081122	0.045896
ENSG00000143643	TTC13	1.05271	1.31821	1.08306	1.52177	1.00209	0.919866	1.23674	1.26124	1.2842	1.37565	1.63077	1.11982	1.20104	1.54624	1.49174	2.5845	1.11433	1.07055	1.60113
ENSG00000124588	NQO2	6.5778	4.94917	5.03916	4.18208	6.21422	5.85808	1.71623	3.75332	6.01761	2.95871	7.7062	4.69498	6.55561	3.07038	5.86786	3.39407	7.26206	4.50314	3.58801
ENSG00000143641	GALNT2	59.828	61.1782	72.2618	65.9392	62.132	68.3735	65.7766	54.7251	67.1926	63.834	55.836	65.2544	60.3038	54.5243	62.8322	67.6727	53.331	64.7432	66.0911
ENSG00000124587	PEX6	2.4815	2.63491	2.93566	2.01725	2.80526	2.27233	2.2737	2.75534	3.07854	2.62828	2.73196	2.57881	2.59685	2.57514	2.58774	2.59626	2.1954	2.78559	2.93008
ENSG00000167332	OR51E2	0	0.033543	0.019012	0	0.01771	0	0.063803	0.073118	0.020278	0	0.018077	0.018509	0	0.055416	0	0	0.059399	0	0
ENSG00000167333	TRIM68	3.09904	3.67532	2.20941	1.73005	3.90618	1.6637	1.71276	4.11388	1.94927	2.65073	3.76606	1.46937	1.55972	3.42639	2.46455	2.38405	3.84294	1.44138	1.3093
ENSG00000009830	POMT2	15.8928	15.7397	13.9181	13.4374	15.1537	14.3607	13.1599	10.3171	10.3676	10.3882	9.64029	7.6798	7.97541	9.73987	9.57048	9.54435	10.0917	8.35814	7.63861
ENSG00000178927	CYBC1	18.7485	21.9267	7.9384	5.96209	24.3873	11.1569	6.97094	30.8565	14.6791	17.4375	26.3416	7.83979	11.7601	24.9867	16.5387	18.0803	23.3962	9.3855	10.3778
ENSG00000178921	PFAS	25.3092	24.6242	20.0736	17.5577	25.6972	20.9549	15.5633	18.4958	15.5916	14.2451	19.8516	13.2212	8.20283	18.9343	15.6915	13.6932	19.2812	13.2045	9.72971
ENSG00000178922	HYI	0	0	0	0	0	0	0	0	0	0	0	0	0	0	0	0	0	0	0
ENSG00000178928	TPRX1	0	0	0.038433	0.027283	0.012373	0	0.028725	0.0129	0.0805	0.084618	0.022544	0.076051	0.137552	0	0.1154	0.140014	0	0.033812	0.071266
ENSG00000168310	IRF2	3.77504	3.08072	0.413108	0.870215	3.75963	0.540622	0.623683	3.56588	1.75755	4.8168	4.66967	0.97003	2.2893	3.19575	3.08298	4.71812	5.07606	0.738838	1.2438
ENSG00000168314	MOBP	0	0.013767	0	0	0.058149	0	0.017457	0	0	0.036913	0.083519	0.030386	0.052957	0	0	0	0.016198	0.019792	0.013704
ENSG00000114268	PFKFB4	4.30225	5.77512	1.47453	1.01306	8.0708	2.09936	1.44861	10.3296	4.23453	4.01985	11.9657	2.07472	3.05922	10.9724	7.58419	5.20692	13.6529	2.09536	1.65661
ENSG00000040487	PQLC2	9.96603	9.52319	3.75428	3.26003	8.43864	3.14364	1.97232	7.43935	3.03801	6.12851	6.96617	1.78945	3.99907	9.20284	4.57238	6.41307	8.24729	2.44121	3.1928
ENSG00000204703	OR2B3	0	0	0	0	0	0	0	0	0	0	0	0	0	0	0	0	0	0	0
ENSG00000204702	OR2J1	0	0	0	0	0	0	0	0	0	0	0	0	0	0	0	0	0	0	0
ENSG00000204701	OR2J3	0	0	0	0	0	0	0	0.015262	0	0	0	0	0	0	0	0	0.006649	0	0
ENSG00000204700	OR2J2	0	0	0	0	0	0	0.025303	0	0	0.020679	0	0.021519	0	0	0	0	0	0	0
ENSG00000146830	GIGYF1	8.55701	8.88504	1.75571	3.30739	9.17271	2.66195	2.3304	8.73518	5.03725	6.81407	8.76892	2.8021	4.28765	9.02302	6.20864	6.86516	9.47676	2.87818	2.82595
ENSG00000204704	OR2W1	0	0	0	0	0	0	0	0	0	0	0	0	0	0	0	0	0.050171	0	0
Human_newGene_47207	Human_newGene_47207	0	0	0.230225	0.529026	0.382542	0	0.359595	0.206856	0.403417	0.409572	0.286561	0.0639	0.353342	0.126003	0.415657	0.27933	0.141964	0.073857	0.311057
Human_newGene_26816	Human_newGene_26816	0.157127	0.205932	0	0	0.149612	0	0.320505	0.057456	0	0	0	0	0.317524	0.377034	0	0.064548	0	0	0
ENSG00000153107	ANAPC1	21.6102	20.5099	13.7464	10.5647	20.948	14.7341	10.48	16.8831	9.87455	9.91825	15.8709	9.78479	5.87265	16.7159	9.70497	10.3899	15.6943	10.2227	7.13832
Human_newGene_26810	Human_newGene_26810	0.679885	0.982337	0.525887	0.471256	0.727387	0.323722	0.204492	0.814104	0.290626	0.433331	0.628172	0.485749	0.624742	0.775568	0.786861	0.662502	0.439227	0.293377	0.318361
Human_newGene_16719	Human_newGene_16719	0	0.102955	0	0	0	0.137399	0	0.091049	0	0	0.364295	0	0.196897	0.185713	0.176937	0.213705	0.465509	0	0
Human_newGene_16710	Human_newGene_16710	0	0	0	0	0	0	0	0	0	0	0.484348	0	0.097424	0.055685	0	0	0	0.12358	0
ENSG00000279263	OR2L8	0	0	0	0	0	0	0	0	0	0	0	0	0	0.040119	0	0	0	0	0
Human_newGene_46156	Human_newGene_46156	2.23079	1.01427	0.635	0.539876	1.62558	0.262273	0.673755	1.77392	0.54152	1.90093	1.84219	0.357008	1.15945	2.50377	2.10777	1.79381	0.878369	0.843068	1.13026
ENSG00000198721	ECI2	23.3483	19.7296	28.1456	20.9197	23.3628	24.5513	20.5985	28.6723	25.9737	17.5462	27.7996	27.1618	21.6635	26.2225	26.0978	18.3747	25.1929	27.8348	20.2743
ENSG00000143756	FBXO28	6.93955	6.97704	2.26741	2.38978	4.34837	2.29337	1.3973	6.63513	1.50238	3.50982	5.56199	1.56842	2.22939	5.85797	3.01539	3.73542	3.94057	1.26222	1.79472
ENSG00000183246	RIMBP3C	0.083321	0.088693	0.015235	0.118035	0.055884	0.040546	0.044311	0.116935	0.068179	0.160958	0.081847	0.03711	0.115565	0.115332	0.115616	0.21388	0.07911	0.029103	0.098476
ENSG00000167807	AC011511.1	0.381632	0.280895	0.484836	0.759131	0.562599	0.883253	0.78098	0.15097	0.644167	0.792001	0.145212	0.234417	1.18125	0.142146	0.659227	0.607594	0.236585	0.844114	1.01791
ENSG00000198723	TEX45	0.339649	0.263051	0.059207	0.163209	0.346056	0.36754	0.455039	0.212736	0.272603	0.337561	0.499174	0.226971	0.252331	0.294513	0.137075	0.113942	0.376228	0.254372	0.156884
ENSG00000167800	TBX10	2.24592	3.63092	0.473047	0.627088	4.16708	0.947727	0.471826	2.26136	0.819342	0.121877	2.49064	0.517256	0.371708	2.34457	0.699513	0.254477	2.4168	0.651263	0.71251
ENSG00000275713	HIST1H2BH	0	0	0.025667	0	0	0	0.028711	0	0	0.024011	0	0	0.049463	0	0	0	0	0	0
ENSG00000183248	PRR36	1.20839	1.48464	0.587162	0.387374	1.20228	0.498453	0.481992	2.0157	1.36467	1.25602	2.76227	1.21578	1.40937	2.44561	1.06362	1.63676	2.25924	1.37082	0.984047
ENSG00000127774	EMC6	39.1079	39.7853	71.3691	67.7956	39.9032	74.2721	61.5228	28.2386	58.7412	56.1865	26.6467	57.624	71.2775	25.243	46.4	56.3435	29.7466	53.3198	64.6677
ENSG00000239920	AC104389.4	0.393905	0.836661	0.833914	0.343687	0.601269	0.599286	0.756615	1.2894	0.237421	0.946597	1.46593	1.2546	0.655193	1.37702	1.30245	0.429551	0.723924	0.060372	0.403877
ENSG00000233927	RPS28	46.9633	41.6653	135.204	201.348	50.6952	132.887	212.226	61.5082	179.229	212.335	63.5073	175.117	254.762	69.4619	161.419	226.166	52.6558	219.574	283.622
ENSG00000173838	2022-03-10	1.25197	1.72338	1.94602	1.36481	1.74242	1.10976	1.02019	2.28874	0.83233	1.6136	2.33848	1.14251	0.892537	2.19755	1.36461	2.06424	2.17112	1.4905	1.47333
ENSG00000122728	TAF1L	0.012984	0.015007	0.046783	0.013556	0.023744	0	0.018808	0.016439	0	0.003979	0	0.02465	0	0.016529	0.023999	0.004273	0.008858	0	0.007469
ENSG00000122729	ACO1	10.8048	12.473	11.0614	12.1193	10.3393	11.0297	10.9852	10.9974	10.2723	10.4988	13.7613	9.74114	9.03819	10.6396	10.5075	10.3154	13.3544	9.73454	9.95322
ENSG00000165406	2022-03-08	10.3938	10.274	2.7313	2.5611	10.1363	2.35328	1.29742	10.9968	2.08231	4.68728	11.4267	1.80854	2.88166	10.6679	4.58141	5.58742	11.9492	2.02994	2.2918
ENSG00000165409	TSHR	0.00944	0.091294	0	0.025018	0.041653	0	0.012953	0.06933	0	0.010326	0.049003	0.031557	0	0.052759	0	0.017534	0.012463	0.039162	0.020336
ENSG00000241258	CRCP	14.5563	21.4275	10.6632	6.02004	19.0366	8.91605	3.29018	14.92	5.9256	7.52822	13.9084	7.39038	3.88064	9.52919	7.22509	7.29733	13.0323	7.89661	3.32043
Human_newGene_8574	Human_newGene_8574	1.17861	0.916549	0.207995	0.295886	1.11789	0.285563	0.16608	0.441324	0.173159	0.248423	0.392188	0.082233	0.196249	0.456739	0.22491	0.233128	0.417345	0.06949	0.10608
Human_newGene_13747	Human_newGene_13747	1.18133	1.09479	0.290619	0.565065	1.3667	0.385042	0.328931	1.26384	0.36657	0.567425	0.732817	0.090459	0.198097	1.27607	0.467179	0.905393	0.779865	0.163385	0.225439
Human_newGene_13744	Human_newGene_13744	0.388497	0.57155	0.364058	0.285187	0.525456	0.212077	0.623023	0.886986	0.368822	0.533937	1.00843	0.213867	0.471151	0.725785	0.481932	0.490954	0.630193	0.182995	0.408942
Human_newGene_13743	Human_newGene_13743	6.21603	6.54491	4.37417	5.13365	3.68247	3.6391	4.71693	6.28109	2.45698	4.37381	6.12109	2.24785	2.18733	6.99659	2.48814	4.25265	5.34782	3.09916	2.75781
Human_newGene_13741	Human_newGene_13741	5.23009	6.30431	3.24437	1.82974	5.71514	3.66478	1.6034	5.67104	2.8715	3.52349	6.01707	3.4507	2.54648	7.33913	3.85866	3.51355	5.59558	2.89447	1.63626
ENSG00000100147	CCDC134	5.08937	6.42822	2.19707	1.87234	6.74401	1.99186	1.00127	6.60187	1.91642	4.10631	7.02668	1.77825	1.49563	6.21063	3.9817	5.49967	6.06529	1.84308	1.93763
ENSG00000240849	TMEM189	3.90894	4.60592	1.05527	0.94541	5.94516	3.57833	1.31369	9.49635	4.41544	9.49182	6.15508	0.746571	2.63585	5.17894	3.38257	4.56515	5.65688	1.01399	2.42627
ENSG00000158683	PKD1L1	1.10288	1.6257	1.29638	1.91506	1.05756	1.01531	1.5144	1.16132	0.924949	0.582143	0.657139	0.690011	0.918611	0.638857	0.656027	0.802302	0.475464	0.741053	0.663299
Human_newGene_10210	Human_newGene_10210	0.292237	0.190658	0	0	0.715676	0	0.079271	0.32675	0.026124	0.097014	0.190885	0.044043	0.022778	0.269726	0.141786	0.09022	0.168695	0.066721	0.018566
ENSG00000278139	AL358075.4	0	0	0	0	0	0	0	0	0	0	0	0.014031	0	0	0	0	0	0	0
ENSG00000008056	SYN1	0.54968	0.447591	0.31215	0.856538	0.356505	0.38696	0.539748	0.312851	0.940029	0.735675	0.280698	0.668579	1.26073	0.450228	0.639808	0.955956	0.463328	0.759379	0.796529
ENSG00000130518	IQCN	0.036834	0	0.012011	0.146244	0.053157	0.259258	0.233965	0.068853	0.172947	0.266627	0.045588	0.312286	0.65593	0.081689	0.132816	0.335766	0	0.293862	0.735077
ENSG00000159374	M1AP	0.063194	0.018157	0	0	0.04184	0	0	0.070046	0.022176	0.026504	0.045906	0.09586	0.048416	0.040402	0.019729	0.024087	0.05801	0.072414	0.052324
ENSG00000159377	PSMB4	214.336	200.094	453.423	560.994	210.013	446.27	576.112	198.148	432.762	386.784	199.993	444.482	488.309	205.867	379.316	380.24	196.139	449.498	513.447
ENSG00000130511	SSBP4	25.754	25.0667	27.4945	13.8468	25.1295	27.1915	14.6797	25.427	23.7021	17.8726	25.7887	17.4416	20.0043	24.0209	19.0191	17.6739	25.0338	20.0423	13.55
ENSG00000130513	GDF15	2.66729	2.67264	11.2886	12.9553	3.17746	14.7393	14.0248	3.68011	14.6634	22.9471	3.68614	16.7359	49.8466	3.27926	13.2061	22.4722	3.68842	13.5685	24.5742
ENSG00000130517	PGPEP1	1.1419	1.27544	0.204765	0.730822	1.52607	0.898742	0.429272	2.03826	1.00346	2.21509	1.85751	0.714374	0.710787	2.69125	1.47138	1.81533	1.47494	1.22043	0.852836
Human_newGene_15998	Human_newGene_15998	0	0	0	0	0	0	0.864694	0	0	0	0	0	0	0	0	0	0	0	0
ENSG00000164758	MED30	13.3743	12.0481	18.946	16.4238	14.9145	19.7957	20.8832	18.0772	14.0095	11.9268	14.6024	15.9476	15.5895	14.9009	15.0268	15.5185	17.3996	17.392	13.5348
ENSG00000164756	SLC30A8	0	0	0	0	0	0	0	0	0	0	0	0	0	0	0	0	0	0	0
ENSG00000164754	RAD21	130.27	119.311	57.3158	32.6883	128.206	69.1188	35.0748	131.644	46.9868	69.0425	136.407	61.1052	46.6117	129.722	62.4916	68.915	133.666	58.8218	40.0304
ENSG00000164751	PEX2	10.7391	5.54486	4.6217	4.10935	10.908	4.86626	2.02675	8.08989	3.07679	2.56363	8.35341	3.65843	2.48319	11.6125	6.11494	3.56359	6.83417	2.78732	3.67041
ENSG00000155508	CNOT8	14.5418	18.5986	5.43917	3.46652	19.266	5.74653	4.4551	16.4746	8.0554	11.5695	16.5176	5.72034	9.53553	18.8424	11.2971	12.0977	17.4036	5.62473	4.20034
ENSG00000159082	SYNJ1	3.33733	3.30372	0.984005	1.38644	3.36944	1.08518	1.13505	3.87786	1.25625	2.50291	3.18827	1.26393	1.57345	4.3627	1.73869	2.3364	2.88794	0.957275	1.24431
ENSG00000155506	LARP1	76.4158	75.7305	20.4027	18.1387	76.1019	21.221	13.8408	57.1007	18.1478	37.7527	56.0166	13.5714	17.5758	62.5101	25.4061	34.1921	55.0159	14.5354	14.0277
ENSG00000159086	PAXBP1	13.2679	13.9776	6.43101	6.6247	14.4292	6.2266	4.45064	17.2566	8.71996	11.2347	14.6146	7.30155	6.4377	17.243	9.1577	10.299	13.6197	7.16272	6.51368
ENSG00000011478	QPCTL	6.80014	6.87487	8.14689	8.0521	6.08126	8.28614	6.44604	3.60146	7.12023	6.81672	5.43246	6.16738	6.94341	4.772	6.50606	6.18998	4.70519	6.97715	7.75727
ENSG00000010704	HFE	0.006412	0.017647	0	0	0.009318	0	0.067192	0	0	0	0.011927	0.006911	0.006729	0	0	0	0	0	0
ENSG00000196616	ADH1B	0	0	0	0	0	0	0	0	0	0	0	0	0	0	0	0	0	0	0
ENSG00000125046	SSUH2	1.08482	0.537886	1.11053	1.27856	0.962752	0.610501	0.87581	0.458743	0.55443	0.391582	0.650092	0.469523	0.027422	0.227736	0.439241	0.545201	0.455029	0.347207	0.438904
ENSG00000196611	MMP1	0.027435	0.105514	0.025945	0.845284	0	0.210887	0.669545	0.206352	0.084778	1.85219	0.250569	0.247965	4.30025	0.3341	0.176072	1.10268	0.263017	0.228829	2.46541
ENSG00000081913	PHLPP1	1.57725	1.84596	0.213888	0.245037	1.53219	0.233935	0.207702	2.30248	0.394792	1.01069	2.35288	0.221862	0.316774	1.95846	0.541622	0.957825	2.38802	0.23814	0.261454
ENSG00000285765	AC134684.9	0.04843	0	0	0	0	0	0.091815	0	0	0	0	0	0.054782	0	0	0	0.10189	0	0
ENSG00000285762	AC253536.7	0	0.011202	0.025397	0.013491	0.011625	0.042791	0.014205	0	0.021741	0.043858	0.008327	0.022477	0.002848	0	0.026694	0.043805	0.005472	0.042031	0.076895
ENSG00000120498	TEX11	0.051562	0.05636	0.016876	0.026895	0	0	0.018878	0.167175	0.077819	0.047364	0.223221	0.097373	0.015611	0.072692	0.02063	0.033619	0.14851	0.028252	0.04253
Human_newGene_14021	Human_newGene_14021	0.028602	0.075082	0.737117	0.498238	0.188937	0.567332	0.365836	0	0.285858	0.607661	0.112339	0.368441	1.28883	0.222665	0.46881	0.82024	0.078273	0.565218	0.654565
ENSG00000005471	ABCB4	0.163565	0.165216	0.090437	0.143431	0.26151	0.067242	0.210192	0.697643	0.310719	0.423568	0.700712	0.300279	0.474621	0.659588	0.39051	0.290051	0.864095	0.521005	0.224452
ENSG00000256713	PGA5	0	0	0	0	0.088031	0	0	0	0.023553	0.074693	0	0	0	0	0.111641	0	0.056708	0.051561	0.02788
ENSG00000037280	FLT4	3.344	3.79265	4.53289	4.68464	3.70698	4.15642	4.17995	7.3961	6.85106	6.37158	6.87708	7.5238	6.63233	6.61165	6.42296	6.92826	8.05327	8.17162	7.63222
ENSG00000160124	CCDC58	39.4161	37.1518	40.0765	16.0314	37.5732	37.989	19.003	31.5125	20.0774	15.5886	36.8752	24.8176	15.787	32.1165	23.9571	17.5987	32.5861	25.7829	11.8561
Human_newGene_7073	Human_newGene_7073	1.21481	0.636737	1.07831	0.931662	0.973797	1.10539	1.70729	1.49052	1.87851	2.09374	1.38731	2.32403	0.957211	1.40275	0.935588	1.45629	1.58072	2.13547	1.18134
Human_newGene_15374	Human_newGene_15374	0.336545	0.566306	0.113636	0	0.870783	0.17436	0.064973	0.511083	0	0.357938	0.724233	0.0535	0.21105	0.428091	0.307097	0.428254	0.527376	0.315174	0.103057
Human_newGene_15376	Human_newGene_15376	0.062267	0.052122	0.235645	0.283557	0.298843	0.173662	0.263439	0.203306	0.645364	0.441256	0.178724	0.405033	0.377017	0	0.475992	0	0.158592	0.384198	0.256207
Human_newGene_35602	Human_newGene_35602	0.414011	0.403977	0	0	0.061823	0	0.372257	0	0.166368	0	0.136484	0.161512	0	0.283147	0.152056	0	0.180252	0.14254	0
Human_newGene_4534	Human_newGene_4534	5.28062	5.37608	1.84945	1.15253	10.2424	1.59424	0.896012	6.49736	2.59211	3.60933	4.36249	1.58118	2.39395	5.6047	2.70086	3.22496	4.14871	1.26779	0.74576
ENSG00000175294	CATSPER1	0.629436	0.850313	0.98472	1.45581	0.643014	1.27048	1.23841	1.3668	1.53667	1.11273	1.10869	1.47605	1.05969	1.02121	1.48284	1.18934	1.03006	1.75488	1.52526
ENSG00000274933	TBC1D3I	0	0	0	0	0	0	0	0	0	0	0	0.039822	0	0	0.063283	0	0	0	0
ENSG00000231389	HLA-DPA1	1.9931	2.67301	3.86827	4.05751	2.82096	3.80621	4.56063	6.22968	10.5524	9.37214	7.0449	9.20215	8.84863	6.70027	12.785	9.6662	7.68386	11.1273	9.93452
Human_newGene_38385	Human_newGene_38385	0	0.420602	0	0.443324	0.372032	0	0	0	0	0	0.186018	0.39295	0.300982	0.180052	0.170223	0.491557	0	0.072035	0.391041
ENSG00000176928	GCNT4	0.019463	0.061135	0.033256	0.050572	0.053178	0.045482	0.019239	0.087831	0.040615	0.102269	0.193826	0.046309	0.119189	0.134085	0.07865	0.095009	0.059485	0.062137	0.033437
Human_newGene_3948	Human_newGene_3948	0.255297	0	0.375876	0	0	0	0.700771	0	0.267268	0.116821	0.11913	0.121977	0	0.206944	0	0.320108	0.341426	0.105931	0
ENSG00000176922	OR51S1	0	0	0	0	0	0	0	0	0	0	0	0	0	0	0	0	0	0	0
ENSG00000176920	FUT2	0.082829	0.059969	0.016996	0.014583	0.184486	0	0	0.190516	0.018127	0.079497	0.206952	0.041365	0.114526	0.177584	0.248827	0.046995	0.150445	0.043108	0.058465
ENSG00000176927	EFCAB5	0.122092	0.170103	0.024582	0.055104	0.027638	0.020108	0.052909	0.097127	0.021977	0.056615	0.009796	0.048854	0.033222	0.074073	0.029328	0.083922	0.143466	0.013066	0.049896
ENSG00000176925	OR51F2	0	0	0	0	0	0	0	0	0	0	0	0	0	0	0	0	0	0	0
Human_newGene_3495	Human_newGene_3495	1.28926	1.50654	0.117288	0.482863	0.937936	1.48258	0.041984	1.56618	0.800814	0.506075	0.857121	0.860825	0.489627	1.26547	0.546097	0.306999	1.84449	0.538319	0.342448
ENSG00000198169	ZNF251	6.99413	5.93399	4.02748	3.17614	5.95928	3.89824	3.71597	4.83066	3.43865	3.39221	5.11295	3.36205	2.89389	4.76145	4.55324	3.15625	4.94667	2.81507	2.88837
Human_newGene_20325	Human_newGene_20325	12.1321	5.97151	14.3684	9.38585	9.7891	20.797	16.2757	10.2061	10.3169	10.6245	10.3443	11.8213	7.40137	8.93727	12.4547	10.3356	11.2583	13.6334	11.1516
Human_newGene_20328	Human_newGene_20328	1.48472	2.01668	0.57539	0.482051	3.00217	0.580708	0.657233	3.2804	1.36515	2.46448	3.8956	0.230977	0.187503	2.49905	2.17831	0.888968	3.6291	0.916248	0.507669
ENSG00000198162	MAN1A2	7.92557	7.89983	4.2079	4.11048	8.05821	4.00367	3.42171	9.11514	4.4381	5.10826	8.95382	4.48803	2.85828	8.64047	9.0351	6.04953	8.31887	4.06613	3.51192
ENSG00000198160	MIER1	10.7841	10.1358	3.9595	3.23541	10.005	2.96118	3.23207	10.5579	4.4597	5.54051	10.4084	2.75701	3.62077	11.3075	4.1148	5.07392	9.23664	2.97696	3.42454
ENSG00000171049	FPR2	0	0	0	0	0	0	0	0	0.021516	0	0	0	0	0	0.042248	0	0	0	0.035427
Human_newGene_24436	Human_newGene_24436	0.189761	0.319744	0.259285	0	0.307827	0.521048	0.295725	0.909644	0.257255	0.401944	0.763067	0	0.156382	0.470237	0.191993	0	0.378764	0.590418	0.064338
Human_newGene_8575	Human_newGene_8575	0.231282	0.413864	0.686704	0.489022	0.491639	0.677357	0.739939	0.281863	0.541627	0.266606	0.397315	0.464312	0.556639	0.360231	0.410934	0.353028	0.434825	0.472164	0.249605
Human_newGene_8576	Human_newGene_8576	0.159008	0.397589	1.54295	0.324166	0.058372	0.617792	0.572292	0.173274	0.820059	0.240151	0.205141	0.375425	0.732958	0.148882	0.359078	0.418556	0.198627	0.209134	0.646739
Human_newGene_7381	Human_newGene_7381	1.90825	2.21968	1.46915	0.257246	2.97556	1.46336	0.514967	1.77151	0.670013	0.512295	2.27227	1.19653	0.587817	2.18374	1.65427	0.714847	2.40579	0.853511	0.506343
ENSG00000171045	TSNARE1	2.91133	3.23279	2.2634	1.07909	3.40088	2.0149	1.24192	5.31251	2.26661	2.68904	5.21159	2.07902	2.04549	5.0206	2.9588	2.939	4.33805	1.89979	1.37964
ENSG00000171044	XKR6	0.098078	0.030091	0.138702	0.137478	0.049457	0	0.057237	0.09594	0.14374	0.206416	0.16118	0	0.039817	0	0.032368	0.071213	0	0	0
Human_newGene_7388	Human_newGene_7388	0.23002	0.02406	0.452358	0.29916	0.106923	0.396075	0.229898	0.052934	0.276177	0.486339	0.090682	0.216669	0.356595	0.192675	0.277603	0.280235	0.028405	0.264421	0.367345
ENSG00000175745	NR2F1	0.943104	1.54946	0.495932	0.330508	1.32525	0.583042	0.276223	0.922627	0.870983	0.872368	1.15388	0.57837	0.908587	1.17914	1.36484	0.890387	1.19674	0.762851	0.432187
ENSG00000179674	ARL14	1.25234	1.27956	0.919085	0.97445	1.44357	1.25962	0.726287	0.357141	0.370146	0.774695	0.770149	0.45441	0.548318	0.574449	0.387074	0.569544	1.18566	0.345003	0.251153
ENSG00000126803	HSPA2	0.005925	0.033712	0.078918	0.040536	0.168031	0.191434	0.021304	0.018558	0.245112	0.125133	0.12712	0.399094	0.235838	0.111393	0.369045	0.155233	0.019834	0.284933	0.151011
ENSG00000179673	RPRML	0.885796	1.14419	0.677726	0.705998	1.24115	1.06835	0.518579	0.986264	0.787171	2.05848	1.21749	0.814419	1.21534	1.4266	1.20294	1.44126	1.05021	0.599993	0.504486
ENSG00000147316	MCPH1	9.22694	7.03722	2.70279	2.18678	7.59362	2.66459	2.20845	10.5556	2.08877	4.42696	7.82024	1.96537	3.12443	10.3198	3.14966	3.86296	8.84911	2.10302	2.48071
ENSG00000145220	LYAR	32.9383	32.9	33.1541	15.9269	32.6733	30.0309	14.7643	25.4544	14.835	19.7907	24.2229	16.2809	15.5462	27.2673	15.3553	19.2158	26.9189	17.4754	13.7327
ENSG00000167476	JSRP1	0	0	0	0	0.082943	0.029172	0.02127	0	0	0.036722	0	0.090464	0.057613	0	0.034981	0.100559	0	0	0.025777
ENSG00000167470	MIDN	39.0077	45.6496	5.10027	6.87282	38.3392	7.67274	7.24311	45.0535	10.2776	17.9319	40.5874	10.5892	18.9242	41.6694	11.2564	16.6001	40.5502	10.7364	12.0532
Human_newGene_12802	Human_newGene_12802	0.627221	0.319495	0.30176	0	0.147052	0.082844	0.499447	0.630859	0.087524	0.099624	0.52578	0.487507	0	0.456268	0.206425	0.164353	0.262205	0.118262	0
ENSG00000253873	PCDHGA11	0.156207	0.205196	0.203751	0.130915	0.202812	0.164922	0.16649	0.445882	0.564194	0.497491	0.504849	0.397391	0.25934	1.04327	0.476254	0.698952	0.60021	0.348469	0.272925
Human_newGene_6380	Human_newGene_6380	0	0.254924	0	0	0.223946	0	0.011992	0	0.014389	0.313666	0.159028	0	0	0	0.014851	0.124454	0.117115	0.013294	0
Human_newGene_6030	Human_newGene_6030	0.090388	0	0.819629	0.394864	0.022208	0.302442	0.404781	0.043672	0.086767	0.324528	0.079383	0.455914	0.522628	0.07873	0.603609	0.620246	0.062514	0.351876	0.827388
ENSG00000069998	HDHD5	21.8016	22.3527	29.3798	20.572	23.3477	27.7866	22.7347	21.5717	23.609	11.0333	22.7066	23.5919	19.8464	22.6295	20.6321	18.6315	23.2158	23.611	10.6584
ENSG00000084754	HADHA	87.4703	78.6764	120.29	122.158	93.1409	139.41	120.773	98.4706	117.93	95.5898	98.0186	128.064	98.4714	98.3076	115.446	105.168	100.613	120.046	112.56
ENSG00000240065	PSMB9	11.0617	9.15977	20.8745	18.5661	15.2011	22.6263	20.6202	26.1451	46.9474	38.6222	30.0356	47.1967	32.666	29.9291	42.9991	39.4813	27.3214	52.4862	32.9791
ENSG00000095637	SORBS1	4.2161	3.51529	1.93162	1.44204	3.25486	2.01136	1.13988	5.19617	1.41687	2.01409	5.30934	2.23212	1.50633	6.53563	1.99569	2.86016	4.90522	2.03259	1.35842
ENSG00000034713	GABARAPL2	28.8902	30.5677	45.6675	50.0267	31.6941	47.0757	54.2351	32.2793	45.3199	36.2169	32.275	43.9603	43.3929	33.8937	42.6891	36.8197	31.4231	44.8976	41.7127
ENSG00000176219	OR11H6	0	0	0.106492	0	0	0	0	0	0	0	0	0	0	0.036731	0	0	0	0	0
ENSG00000230522	MBD3L2	0.416434	0.9611	0.211026	0	0.366546	0	0.298336	0.161882	0.376075	0.127037	0.248722	0.263537	0.522427	0.210536	0.110612	0.066542	0.19419	0.36576	0.299953
ENSG00000146047	HIST1H2BA	0	0	0	0	0	0	0.229245	0	0	0	0	0	0	0	0	0	0	0	0
Human_newGene_2726	Human_newGene_2726	0	0	0	0	0	0.47146	0	0	0	0	0	0	0	0	0	0	0	0	0
Human_newGene_2725	Human_newGene_2725	0	0	0.093789	0.638351	0.143022	0.112291	0	0	0.128167	0	0	0.112307	0.21421	0.125969	0	0.139825	0	0	0
Human_newGene_2722	Human_newGene_2722	3.29787	3.47712	2.18104	1.71565	3.50867	1.22845	0.792119	2.37734	1.04131	2.62049	2.40604	1.06185	1.84222	2.76992	1.98131	1.38405	1.7097	1.37158	1.75656
ENSG00000146049	KAAG1	0	0	0	0	0	0	0	0	0	0	0	0	0	0	0	0	0	0	0
ENSG00000148225	WDR31	0.658957	0.643934	0.436757	0.368144	0.548158	0.409657	0.148564	0.833867	0.433519	0.248772	0.882967	0.26004	0.207861	0.784719	0.472	0.263716	0.603171	0.362532	0.188437
ENSG00000133135	RNF128	0.038373	0.016557	0.037539	0	0	0.018527	0	0.10937	0.027255	0	0.017846	0.027409	0	0.10768	0.050281	0.018732	0.085882	0.047451	0.032853
ENSG00000133134	BEX2	2.01044	2.55632	5.54313	5.04303	2.94229	5.53047	7.77881	4.67586	7.28524	6.33325	4.6922	8.21847	8.39681	3.94418	6.26108	8.08171	3.91437	8.6996	8.28585
ENSG00000133131	MORC4	5.91575	5.36396	4.57279	4.32039	5.42776	4.11552	4.25253	6.08369	4.85756	4.06066	5.96907	4.60897	3.44446	6.29225	4.63652	4.81508	6.02533	4.52574	3.76663
ENSG00000148229	POLE3	61.1385	58.6912	59.9351	42.2562	62.5449	24.149	45.7495	46.4744	59.3787	51.956	45.4076	57.8976	51.9889	48.5704	63.2221	51.7436	43.1378	57.1682	50.654
ENSG00000138308	PLA2G12B	0	0	0	0	0	0	0	0	0	0	0	0	0.045166	0	0	0	0	0.038838	0
ENSG00000133138	TBC1D8B	1.50519	1.2209	0.834413	0.612447	1.46791	0.481146	0.606559	1.66033	0.950979	1.07864	2.09128	0.639794	0.833244	2.13144	1.09089	0.963987	2.03189	0.539828	0.599261
ENSG00000144579	CTDSP1	26.1457	26.4	7.545	7.79132	27.029	10.0174	5.99787	24.6706	11.8657	16.918	24.3667	8.25269	10.0752	17.5526	17.194	13.1775	25.7108	8.30497	7.8968
ENSG00000067840	PDZD4	3.13616	3.73157	4.46544	2.17994	6.08158	6.11906	3.99559	12.9038	6.09672	6.09254	7.80594	14.8232	5.2282	8.34828	7.44894	5.58587	9.0196	15.6016	6.13833
ENSG00000146592	CREB5	16.1791	16.5346	16.1287	9.46273	15.2018	15.6048	9.77654	16.1924	12.7116	9.22328	15.041	10.5632	8.46799	14.6251	11.0815	9.80433	15.8794	11.7611	9.47883
ENSG00000172828	CES3	0.330621	0.754452	0.505165	0.566024	0.31789	0.546693	0.435239	1.41089	0.898789	1.10072	0.510253	0.742961	0.531567	0.749321	0.855948	1.04296	0.805398	0.614585	0.601021
ENSG00000141068	KSR1	2.52554	2.20434	0.718107	0.822317	2.56556	0.823152	0.674049	2.38587	1.00402	1.77002	2.12538	0.64261	0.823337	2.27623	1.10162	1.95418	2.47257	0.62504	0.843759
ENSG00000137309	HMGA1	574.157	589.806	937.756	1179.23	523.938	853.091	1128.99	507.851	956.247	738.761	501.35	826.337	890.556	485.442	734.664	718.388	548.008	859.782	969.218
ENSG00000144681	STAC	14.6072	16.2193	17.2591	23.804	13.5633	17.6044	17.2123	11.7299	12.1605	11.2242	11.7626	9.59792	7.93322	10.7176	9.95296	9.72414	9.74365	10.4822	12.6208
ENSG00000172824	CES4A	0.09322	0.16311	0	0.010177	0.035995	0.042158	0	0.077445	0.175433	0.125714	0.267264	0.199249	0.077468	0.229863	0.246423	0.210929	0.263386	0.070193	0.052591
ENSG00000066468	FGFR2	2.40087	2.28394	0.290298	0.442372	2.11315	0.289133	0.197628	3.13732	1.52605	2.11187	3.21874	0.390227	0.679478	3.86225	1.64907	2.33105	3.94402	0.786369	0.323914
Human_newGene_16056	Human_newGene_16056	0	0	0.494291	0.554021	0	0.254952	0.565057	0.42988	0.622323	0.60892	0	0	0.310435	0.562455	0.222525	0	0	0.358682	0.098271
ENSG00000173193	PARP14	7.39557	7.13123	4.01559	3.66445	6.63986	3.57402	2.38014	8.55931	6.0872	8.4124	8.92137	4.30872	3.58566	9.18646	7.34066	8.68163	7.833	4.73995	3.39807
ENSG00000067596	DHX8	16.1953	15.0471	9.82948	8.96319	16.9271	10.8619	7.96483	13.4508	7.50995	10.4246	16.0638	9.46379	9.38633	14.2063	8.44738	11.077	14.4436	9.44772	9.59532
Human_newGene_1564	Human_newGene_1564	0	0	0	0	0	0	0	0.453714	0	0.252793	0	0	0	0	0.12248	0	0	0	0
ENSG00000116604	MEF2D	18.2156	19.9709	9.73741	7.57154	18.793	7.36523	6.6378	18.6873	6.45858	12.6233	22.9344	5.66288	10.506	19.2799	7.82644	12.213	23.7759	7.52738	7.49969
ENSG00000070808	CAMK2A	0.026186	0.060587	0	0.038253	0.044977	0.039194	0.022227	0.12064	0.084231	0.056431	0.078956	0.019344	0.047801	0.106564	0.155806	0.054863	0.040041	0.025199	0.050839
Human_newGene_40325	Human_newGene_40325	2.50022	2.36812	1.94117	1.68954	3.35716	1.60765	2.29752	2.83643	1.76702	1.63747	2.37734	1.46776	2.10448	2.49966	2.0032	1.9996	2.57914	1.87592	1.98244
Human_newGene_40327	Human_newGene_40327	2.0063	2.17496	0.339925	0.544727	2.37318	1.01208	0.192481	1.8279	0.585321	0.638605	1.69475	0.246398	0.478953	1.84284	0.914089	0.911095	1.65448	0.375796	0.663809
Human_newGene_13260	Human_newGene_13260	0	0	0.126491	0.210888	0.116258	0.245559	0.429675	0	0	0.144966	0	0.30786	0	0	0.104823	0.2285	0	0.519039	0.108849
Human_newGene_13269	Human_newGene_13269	1.78855	2.46323	0.790055	1.0922	2.49054	0.973095	0.372161	1.67999	0.738939	1.10531	1.96231	0.76659	0.423226	2.58619	1.88305	0.937056	1.5375	0.939165	0.669498
Human_newGene_40329	Human_newGene_40329	0.237502	0.341826	0	0.200097	0.039735	0	0.007182	0.187965	0	0.01464	0.088041	0.162633	0.175462	0	0	0.05975	0	0.004889	0.00357
ENSG00000080189	SLC35C2	15.5766	11.6131	10.2255	6.37121	11.2479	9.31345	5.50934	12.0912	12.1624	8.85528	12.6788	5.58886	8.56066	12.0479	6.34667	6.92065	10.5594	5.33594	4.54443
ENSG00000147883	CDKN2B	0.123217	0.213389	0.026659	0.028727	0.088027	0.07998	0	0.136502	0.11414	0.126388	0.183215	0.051205	0.07816	0.198693	0.143781	0.22307	0.361695	0.046074	0.023054
ENSG00000147885	IFNA16	0	0	0	0	0	0	0	0	0	0	0	0	0	0	0	0	0	0	0
Human_newGene_45666	Human_newGene_45666	1.17037	2.14412	4.5268	1.48227	2.04985	3.63814	2.60152	2.2785	2.00569	2.54762	2.96634	2.77384	2.20757	3.11535	2.64131	1.91767	2.33682	2.39737	1.35444
ENSG00000147889	CDKN2A	0	0.040893	0	0	0	0	0	0.028674	0.0463	0	0	0	0	0.166283	0	0	0	0	0
Human_newGene_45665	Human_newGene_45665	1.00386	1.04667	1.43155	0.703127	0.973181	1.5657	1.07203	0.854903	1.18182	0.782291	0.426348	1.66658	0.749672	0.553961	0.922017	1.03709	0.687104	0.799832	0.778595
ENSG00000101935	AMMECR1	2.10515	1.86169	0.402922	0.40403	2.13855	0.427156	0.251032	2.11663	0.615114	1.12142	1.57305	0.284421	0.465719	1.87451	0.803399	0.982462	1.73433	0.281478	0.441106
ENSG00000101938	CHRDL1	3.93849	3.71052	4.48113	5.78605	4.30415	4.10182	4.70344	6.24033	5.79741	6.06666	5.18983	6.73053	5.59088	6.33916	7.15711	6.27853	6.9618	6.05988	7.89408
ENSG00000130656	HBZ	0	0	0	0	0	0	0	0	0	0	0.061337	0	0.168699	0	0	0	0	0	0
ENSG00000130653	PNPLA7	0.093951	0.149975	0.173872	0.13161	0.187932	0.119547	0.068953	0.134689	0.218182	0.192423	0.16383	0.203689	0.289344	0.087166	0.496956	0.287077	0.313084	0.295482	0.214634
ENSG00000223591	CENPVL1	0.850557	0.46022	1.21353	0.043345	0.847829	1.11299	0.916779	0.606943	1.05039	0.957035	0.273586	0.949413	0.774375	0.440035	0.612969	0.73332	1.08398	0.865315	0.364971
ENSG00000113389	NPR3	0.080758	0.098418	0	0.007522	0.091204	0.013977	0.038994	0.056339	0.02845	0.09614	0.089009	0.036482	0.080785	0.064395	0.147047	0.098963	0.06588	0.045563	0.085676
Human_newGene_44138	Human_newGene_44138	0.430428	0.223163	0.76172	0.733954	0.910213	0.650385	0	0.245962	0.179884	0.264366	0.266732	0.246288	0.161427	0.245794	0.121899	0.252478	0.149403	0.526169	0.333484
Human_newGene_40497	Human_newGene_40497	0	0	0.554615	0.262019	0	0	0	0.095299	0	0	0	0	0	0	0	0	0.288035	0	0
Human_newGene_30174	Human_newGene_30174	1.14804	0.972248	0.828574	0.703362	1.19978	0.530104	1.04371	1.13629	1.08779	1.54018	0.662189	0.79416	0.954747	2.01513	0.928909	1.63344	1.15005	0.973693	0.711653
Human_newGene_30175	Human_newGene_30175	3.88077	3.11616	3.46516	4.73895	2.72286	4.24019	3.07021	5.21753	4.84516	1.87878	2.51226	3.12088	4.85428	4.30474	5.15324	4.46779	8.18528	3.52391	3.07437
Human_newGene_49323	Human_newGene_49323	0.525175	0.783128	0.02408	0	0.598995	0.508361	0.264049	0.148912	0.860388	0	0.275097	0.258554	0.183428	0.603357	0.608898	0.376364	0.451675	0.721015	0.684827
Human_newGene_40493	Human_newGene_40493	4.10367	2.68294	2.49691	1.97272	4.30884	2.4856	1.65869	3.77339	2.31046	2.76004	4.27505	1.81686	1.23205	5.52171	3.36879	2.53208	4.92315	2.3595	0.847117
ENSG00000113384	GOLPH3	33.4752	34.2124	6.54893	5.79827	33.2019	6.92879	5.00807	39.9415	8.47834	21.258	39.8767	5.0736	12.1353	41.6005	13.5606	20.548	41.3603	5.41671	7.30758
ENSG00000099985	OSM	0.029152	0	0	0	0	0	0.05733	0	0.082073	0.223277	0	0.226239	0.147824	0	0.027061	0.046313	0	0.099615	0.134637
ENSG00000099984	GSTT2	0.455545	0	0.347628	0.424403	0.165949	0.550987	0.784641	0.32699	0.628966	1.05193	0.744417	0.9339	0.975315	0.375192	0.585227	0.591791	0.688092	0.21434	0.360426
ENSG00000076258	FMO4	0.152522	0.265291	0.105653	0	0.126509	0.097634	0.078703	0.214106	0.170051	0.191334	0.312008	0.118796	0.178948	0.24352	0.308567	0.122452	0.148749	0.21872	0.072019
ENSG00000180592	SKIDA1	0.303032	0.309405	0.066138	0.093596	0.143572	0.037996	0.07996	0.391097	0.256882	0.138289	0.282832	0.154109	0.092582	0.225452	0.362634	0.226597	0.220208	0.178453	0.05895
ENSG00000061656	SPAG4	2.49606	3.16976	3.48338	3.71152	3.03418	3.39607	4.78179	3.68128	6.56339	4.97599	4.33316	7.0015	9.33734	5.7097	5.54705	5.83599	4.77595	8.56542	7.40612
ENSG00000180596	HIST1H2BC	4.85503	4.73887	3.85054	5.03944	7.02851	6.16132	6.36099	1.76051	2.14712	1.67997	2.97406	2.35752	2.06724	2.2917	2.11697	1.18503	4.22041	3.41684	2.31429
ENSG00000073578	SDHA	75.1416	81.7405	69.6135	32.7731	79.7368	69.2527	32.5251	84.8537	60.6495	45.7864	86.2585	59.0903	38.0021	81.3434	60.0191	45.0636	87.2905	59.1848	31.4366
ENSG00000169203	NPIPB12	2.12372	2.12547	3.15172	3.15291	2.28662	2.28132	3.0276	1.93646	2.70252	1.71538	1.71035	2.32316	2.2304	1.63918	2.7455	2.44575	1.40985	1.78575	2.20549
ENSG00000089009	RPL6	687.427	736.827	1334.09	1129.01	710.922	1419.24	1258.92	641.679	1428.06	1167.35	821.936	1747.88	1415.27	859.117	1304.52	1216.63	757.063	1163.86	1517.09
ENSG00000169208	OR10G3	0	0	0	0	0	0	0	0	0	0	0	0	0	0	0	0	0	0	0
ENSG00000089006	SNX5	61.6309	65.545	109.759	59.8828	70.0587	97.481	72.2823	55.561	63.5506	44.3079	54.8362	77.4765	61.9921	44.7755	61.6384	43.2763	54.9835	81.7476	57.1016
ENSG00000261341	AC010325.1	0.56762	0.144932	0.277062	0.142752	0.821739	0.826218	0.379454	0.050933	0.752472	0.568228	0.307295	0.572962	0.214269	0.42345	0.082958	0.319334	0.073487	0.379779	0.559119
ENSG00000269113	TRABD2B	0.832333	1.02407	0.320528	0.195822	0.862441	0.314775	0.259168	1.27606	0.353562	0.914725	1.40128	0.211851	0.325427	1.6822	0.491748	1.06556	1.32668	0.241172	0.249628
ENSG00000117266	CDK18	3.71402	3.56022	3.64644	2.1682	4.47501	3.51658	2.98231	6.44365	4.65951	4.3735	6.60505	4.74134	4.80377	5.45608	4.78282	4.78396	7.61245	4.85346	3.77165
ENSG00000117262	GPR89A	6.10955	5.66406	6.02394	7.39046	8.19807	8.59154	4.74361	10.7576	5.74828	5.65843	8.16284	4.9092	5.18116	12.2139	7.0176	5.86156	4.31501	6.38357	6.93261
ENSG00000107831	FGF8	0.610923	0.198892	0.404022	0.180126	0.122891	0.388786	0.130862	0.338841	0.259957	0.6579	0.370508	0.608161	0.894971	0.343645	0.149023	0.350316	0.454394	0.561975	0.632683
ENSG00000107833	NPM3	115.8	106.213	215.319	155.219	110.502	209.579	169.421	81.17	164.531	122.438	85.9139	160.917	150.459	86.892	151.739	118.632	83.5042	166.477	135.923
ENSG00000156509	FBXO43	0.065546	0.041748	0.017155	0.018227	0.015981	0	0.057571	0.040085	0.103029	0.1175	0.023869	0	0.01653	0.050004	0.217051	0.104144	0.017866	0.050121	0.015064
ENSG00000156508	EEF1A1	3861.04	3423.63	4821.08	4732.94	4229.71	6143.53	4332.74	4748.24	7059.69	6061.56	4336.14	5910.92	5091.71	5149.45	6484.35	4182.27	5438.6	5882.76	4885.13
Human_newGene_23917	Human_newGene_23917	0.361389	0.186915	0.654958	0.579555	0.300285	1.2889	1.7972	0.476867	0.907474	0.709244	0.477762	1.77791	2.1122	0.442872	0.571599	0.34695	0.459132	1.93205	1.89251
ENSG00000156502	SUPV3L1	19.0808	17.2922	13.1535	11.3974	18.115	14.3789	9.49199	16.5489	9.17928	12.6069	17.0995	9.04404	10.7309	16.1867	10.0652	12.2741	15.9658	10.2975	8.51951
ENSG00000156500	FAM122C	0.406233	0.312214	0.663122	0.487145	0.38002	0.730143	0.394746	0.768367	0.725285	0.714723	0.819589	0.914623	1.00616	0.467837	0.734558	0.937319	0.574439	0.673341	0.869982
Human_newGene_39933	Human_newGene_39933	0.48612	0.237426	0	0	0.26094	0	0	0	0.128557	0.390028	0.606602	0	0	0.540471	0.066452	0.069891	0.347639	0	0
ENSG00000156504	FAM122B	7.71128	8.12726	3.84229	7.879	7.39193	5.50551	6.59927	7.17202	4.58718	6.09804	7.1429	6.07613	4.79429	6.39619	5.30061	6.01291	6.92571	5.04888	4.63871
Human_newGene_25428	Human_newGene_25428	0.58995	0.790075	0.45645	0.434297	0.648693	0.552917	0.445017	0.337739	1.06373	0.647301	0.409091	0.856995	0.671742	0.938714	1.18017	0.957214	0.820135	1.03725	1.38078
ENSG00000103642	LACTB	29.2053	27.1736	13.999	8.85848	29.365	14.0298	7.91674	27.1521	12.1366	18.7448	26.5575	10.4954	11.3544	23.2355	13.8088	18.4337	24.9316	10.6302	8.7789
ENSG00000103647	CORO2B	2.36933	2.72471	1.56863	2.67223	2.43714	1.93723	3.26563	1.96718	1.04876	4.1843	1.67355	1.16681	7.38356	1.86638	1.47919	3.99738	2.00469	0.941094	3.19972
ENSG00000064687	ABCA7	2.1246	3.04358	2.76089	5.42551	2.40162	4.98532	5.71183	2.06041	4.36644	3.08777	3.01025	3.48004	2.87451	1.95481	3.13422	3.48287	2.46403	3.1878	4.42327
ENSG00000263874	LINC00672	0.014639	0.063312	0.033463	0.011028	0.062175	0.048818	0.051797	0.069541	0.07913	0.057386	0.053196	0.08356	0.048206	0.027086	0.131452	0.093623	0.068629	0.04928	0.031103
ENSG00000022556	NLRP2	0	0.085995	0.014786	0	0.06735	0.11676	0	0.150252	0.045943	0.366677	0.14021	0.028741	0.29336	0.16497	0.066456	0.051646	0.211231	0.062504	0.025966
ENSG00000181074	OR52N4	0	0	0	0	0	0	0	0	0	0	0	0	0	0	0	0	0	0	0
ENSG00000076928	ARHGEF1	14.9913	16.5906	18.067	17.5307	17.967	18.8294	17.6832	14.0928	12.2035	14.1511	13.6953	12.9132	14.5232	13.0113	14.1103	14.375	16.7374	13.7945	11.1162
ENSG00000181072	CHRM2	0	0.007881	0	0.027793	0	0	0	0.02603	0	0	0.03398	0	0	0.017361	0.016927	0.017833	0.041218	0	0
ENSG00000076924	XAB2	26.1188	28.0025	40.1363	47.284	27.2523	41.7651	46.2977	23.4077	39.5513	39.7055	25.9191	39.5876	47.2772	23.3067	36.0911	42.9797	26.503	39.6068	46.6691
ENSG00000143337	TOR1AIP1	10.774	7.68428	7.22678	5.65689	10.0534	8.64991	5.63925	10.6988	7.17098	6.18589	8.86561	6.59991	3.03966	7.39314	7.66976	6.73227	8.1273	4.76422	5.39277
ENSG00000143333	RGS16	2.19116	2.08299	0.940841	1.784	2.40498	2.33619	2.30837	2.05555	1.08101	2.08709	1.89774	2.36346	4.44844	2.07833	1.17155	1.59985	1.82031	2.11327	3.4731
ENSG00000134020	PEBP4	0	0	0	0	0	0	0	0	0	0	0.012034	0	0.109105	0	0	0	0	0.050114	0
ENSG00000168152	THAP9	1.21191	1.92898	0.966374	0.23728	1.67006	0.758904	0.366136	1.58831	0.621875	0.974473	2.10984	0.532627	0.495094	1.32716	0.700654	0.580727	1.60845	0.563361	0.553907
ENSG00000189241	TSPYL1	20.4094	21.3761	21.3181	14.1576	22.4187	19.9379	13.5194	20.7735	25.93	21.2693	20.637	22.6082	21.5134	20.7832	25.4582	20.7558	22.4336	23.9965	18.6099
ENSG00000134028	ADAMDEC1	0	0	0	0	0	0	0	0	0	0	0	0	0	0	0	0.022311	0.023451	0	0
ENSG00000111837	MAK	0.156952	0.236035	0.245003	0.078007	0.238651	0.10708	0.05148	0.162234	0.096454	0.315385	0.343241	0.103144	0.028577	0.266429	0.17647	0.245949	0.273078	0.082494	0.057006
ENSG00000111834	RSPH4A	0.470479	0.370853	0.114089	0.214094	0.293443	0.1377	0.194226	0.270893	0.272697	0.13126	0.265619	0.056815	0.081155	0.380795	0.41034	0.137607	0.251156	0.181334	0.163689
ENSG00000111832	RWDD1	14.1119	12.2823	17.647	13.0537	10.7666	15.4977	13.0314	11.7884	10.6229	9.95597	10.5471	14.2918	8.77772	10.0107	11.988	8.7447	11.8115	13.2044	9.90751
ENSG00000171903	CYP4F11	4.833	4.12593	3.30697	2.75827	4.00919	2.89652	2.73571	6.62886	5.54327	3.93225	5.43359	5.04486	6.93105	7.27616	6.5082	4.44402	5.30354	5.63424	4.82528
ENSG00000188596	CFAP54	0.313604	0.016121	0.177014	0.042431	0.044112	0.023565	0.120832	0.021322	0.005775	0.037429	0.023148	0.015707	0.010242	0.067924	0.009415	0.050383	0.048339	0.018264	0.018683
ENSG00000170100	ZNF778	4.96435	3.01082	0.890447	1.02998	6.12197	0.998378	1.71962	4.79206	1.72133	2.91964	2.75081	1.36092	2.22623	4.61991	3.03276	3.61383	4.88786	1.69457	2.85172
ENSG00000183354	KIAA2026	2.20274	3.42409	0.929514	0.914234	2.29624	0.971984	0.731217	2.39934	0.635132	1.74422	2.17135	0.471469	1.13748	4.25818	1.31511	2.1996	2.5532	0.532596	0.709025
Human_newGene_42235	Human_newGene_42235	0.050091	0.279817	0	0.26031	0.14684	0.290223	0	0.218438	0.283848	0.156961	0.25873	0.142905	0	0.095219	0.256227	0.119944	0.390908	0.207809	0
ENSG00000119760	SUPT7L	14.4039	14.6415	12.299	9.67098	15.5078	11.8927	8.45615	13.6127	9.31168	11.3382	12.6756	10.6245	9.33574	14.9562	11.0141	11.0829	12.0579	8.77499	9.80495
ENSG00000019995	ZRANB1	4.76323	4.81239	1.26848	1.934	3.99142	1.40649	0.722541	5.14561	1.30628	2.5766	4.8587	0.92341	1.41088	4.88128	1.48616	2.39279	4.82707	1.6745	1.07972
ENSG00000198796	ALPK2	6.47024	5.76834	2.50896	1.98667	5.42016	2.02722	1.77973	8.25716	3.234	3.18571	7.1697	2.84958	2.40109	7.10972	3.13398	3.06914	7.30888	2.47625	1.94554
ENSG00000019991	HGF	0.009028	0	0	0	0	0	0	0.023883	0.008843	0	0	0	0	0.020145	0	0	0.018241	0	0.007491
ENSG00000147059	SPIN2A	0.571234	0.373367	0.542933	0.323035	0.45438	0.462587	0.101531	0.055922	0.158152	0.334494	0.421338	0.312641	0.223565	0.663675	0.221017	0.443297	0.069734	0.103526	0.270105
ENSG00000197776	KLHDC1	0.630138	0.679488	0.145212	0.120105	0.527103	0.250507	0.137023	0.508593	0.404999	0.23789	0.292389	0.337057	0.181406	0.552385	0.305835	0.295217	0.386707	0.208914	0.17967
ENSG00000135776	ABCB10	4.74422	4.758	4.47248	4.28819	4.84201	3.91111	3.36531	5.13483	3.94928	3.9236	4.35334	3.7195	3.38683	5.03984	4.72703	4.35323	3.83488	3.46155	3.28579
ENSG00000135775	COG2	7.64414	6.202	4.12294	2.36091	7.11098	3.35681	2.49679	6.91609	2.06364	3.47812	6.37194	2.05454	2.42032	6.15986	2.19541	3.42133	5.96497	2.28857	1.93619
ENSG00000139428	MMAB	6.12385	7.60933	8.86992	9.84913	5.352	8.4772	9.83878	6.15894	6.14223	3.44744	7.23909	6.98369	5.45326	5.83187	7.44299	3.04746	4.79465	6.60671	5.4524
ENSG00000135773	CAPN9	0	0	0	0	0	0	0	0	0	0	0	0.020398	0.02051	0	0	0	0.012887	0.053869	0
ENSG00000147050	KDM6A	8.46529	7.64381	1.63596	1.92402	7.54404	2.24603	1.20061	6.98341	2.21268	4.25112	6.2668	1.00744	1.81852	6.98008	2.95666	4.59598	6.66028	1.16679	1.02693
ENSG00000152990	ADGRA3	11.661	11.6171	5.27209	4.43411	11.7164	5.22004	3.96179	13.2322	6.84993	8.59194	13.3594	5.05003	4.53598	12.659	7.56377	7.65557	13.3056	5.14556	4.00187
ENSG00000197774	EME2	4.72969	5.95307	3.28834	3.93107	5.43422	2.85047	3.25769	2.99811	3.23196	2.8266	3.64635	2.56236	2.5067	2.81501	2.57784	3.18213	2.69105	2.232	2.11466
ENSG00000132749	TESMIN	3.02158	2.85208	2.02827	1.13388	3.12038	1.66831	1.18123	3.78886	2.8978	2.52863	4.22856	2.44699	2.5852	4.75833	2.4321	2.52697	4.45612	2.8986	2.42546
ENSG00000165646	SLC18A2	0.792767	0.995315	1.20353	0.957235	0.953221	1.04035	0.857867	1.88454	2.27871	2.06542	2.33093	3.01821	2.10067	2.13021	2.56946	1.94238	2.02147	3.04933	2.90559
ENSG00000132746	ALDH3B2	0	0	0	0	0.037186	0.017929	0.044655	0.096728	0	0	0	0.019432	0	0	0	0	0	0.033132	0
ENSG00000165644	COMTD1	6.49072	8.57251	16.7176	11.7937	8.71185	16.5106	14.4525	7.93253	10.8761	8.68242	8.55744	12.7075	13.3661	7.80713	8.88343	9.02666	6.34334	11.7278	11.8723
ENSG00000132744	ACY3	0.025908	0.141936	0.281042	0.185809	0.075773	0.061292	0.045496	0	0.163744	0.139418	0.247025	0.115223	0.19582	0.096814	0.16536	0.395894	0	0.034387	0.099266
ENSG00000165643	SOHLH1	0	0	0	0.028271	0	0	0.029766	0.048412	0	0	0.050602	0.025905	0.02564	0	0	0	0.027712	0	0
ENSG00000132740	IGHMBP2	7.03444	6.58308	5.54101	4.06818	6.34765	5.80773	4.10297	5.05398	4.96347	4.86152	4.69495	3.64577	3.10732	5.01134	4.61038	4.62339	6.1489	4.43647	2.95418
ENSG00000153029	MR1	0.183132	0.223987	0.364834	0.089414	0.452471	0.20599	0.163043	0.708861	0.636287	0.71216	0.408617	0.477099	0.453927	0.782342	0.448982	0.826991	0.870331	0.452718	0.14736
Human_newGene_39336	Human_newGene_39336	0.440144	0.124045	0.115309	0	0.327388	0.082544	0.093961	0.299991	0.149683	0.047415	0.23318	0.078937	0.095612	0.272156	0.213316	0.084527	0.190377	0.045727	0.01788
Human_newGene_46427	Human_newGene_46427	0.368221	0.357781	1.46054	1.64008	0.537974	1.71331	1.46861	0.498684	1.20363	2.41301	0.38049	1.64874	2.57177	0.212203	1.36987	2.09766	0.292112	1.97977	2.31266
ENSG00000187026	KRTAP21-2	0	0.103882	0.118564	0	0.109698	0	0.128148	0	0	0	0	0.058493	0.094175	0	0.103003	0.118728	0	0	0.105517
ENSG00000187024	PTRH1	10.0033	7.08583	12.7592	11.7011	7.83163	7.02021	11.2136	14.8474	10.9927	14.0206	5.8659	9.15276	13.4436	14.0453	13.6524	13.0866	7.43011	18.2625	10.6538
ENSG00000111224	PARP11	4.28243	3.80192	1.48727	1.55347	3.81017	2.23357	1.44368	4.13788	2.64988	2.32321	4.36621	1.5899	1.42864	4.55828	2.84345	2.37415	4.50275	1.39602	1.54574
ENSG00000187021	PNLIPRP1	0.03809	0	0	0.051564	0	0	0	0.031135	0	0.02498	0.015136	0	0	0.02234	0.021419	0.058294	0	0.015622	0
Human_newGene_33883	Human_newGene_33883	2.45132	1.73085	0.343511	0.652042	1.8315	0.281954	0.382587	0.824692	0.163194	0.669114	0.833777	0.114243	0.131473	0.794897	0.284293	0.660227	0.675903	0.108423	0.116654
Human_newGene_33880	Human_newGene_33880	0	0	0	0	0	0.338245	0.470182	0	0	0	0	0	0.085183	0	0	0.075619	0	0	0
ENSG00000188629	ZNF177	0	0	0	0	0	0	0	0	0	0	0	0	0	0.006159	0	0.011311	0.094125	0	0
ENSG00000180035	ZNF48	4.604	1.95404	0.976521	0.715431	4.33879	1.27579	0.754979	0.745313	1.30854	2.00386	1.8424	0.24083	1.16223	3.83367	1.05142	2.13875	3.48203	1.15272	0.678374
Human_newGene_33884	Human_newGene_33884	0.137293	0.09373	0.708932	0.417229	0.211279	0.839296	0.473236	0	0.214805	0.070013	0.127704	0.238416	0.129417	0.085981	0.116188	0.08951	0	0.306835	0.196555
ENSG00000188624	IGFL3	0.16247	0	0	0	0	0.467256	0.089343	0.11635	0.049753	0.222161	0.459188	0.153697	0.230109	0	0.150564	0.347003	0	0.357669	0.232838
ENSG00000188626	GOLGA8M	1.30858	2.77629	1.58119	1.45388	1.17479	1.2266	1.08534	2.48716	0.806948	1.52711	1.87134	0.458902	0.176161	2.1949	2.99605	1.47234	1.67306	1.01099	2.01198
ENSG00000066855	MTFR1	11.954	11.7886	12.0754	10.8552	12.5383	11.0086	9.15233	11.8554	6.75723	7.43423	11.8928	9.63449	6.76732	10.658	7.36624	7.87444	10.7532	9.0621	7.32116
ENSG00000188620	HMX3	0.659816	0.926591	0.306812	0.434841	0.516877	0.256139	0.490227	1.00509	0.542622	1.02665	1.04531	0.719381	1.25551	1.08114	0.710293	0.771209	1.03492	0.620948	0.967073
ENSG00000185774	KCNIP4	0.431265	0.350576	0.08717	0.10233	0.296231	0.184701	0.110038	0.589583	0.135885	0.177867	0.4748	0.170378	0.084244	0.44369	0.221221	0.197615	0.440439	0.115199	0.123493
ENSG00000185775	SPATA31A6	0	0	0	0	0	0	0	0	0	0.011713	0	0	0	0	0.03576	0.015671	0.013082	0	0
ENSG00000090054	SPTLC1	34.5301	26.4155	29.9236	33.4055	33.0845	29.1476	31.7405	26.447	27.9337	24.6436	32.8952	29.117	29.1918	29.1862	29.1014	29.3859	31.8292	27.9318	29.7751
ENSG00000101096	NFATC2	6.37646	6.66711	2.11803	0.866789	6.88445	1.43597	0.890175	1.94496	0.522195	0.615983	2.3269	0.322514	0.178558	2.13642	0.738782	0.723948	2.03794	0.423193	0.314352
ENSG00000101098	RIMS4	13.0598	13.5808	12.8347	11.1051	14.7099	11.595	10.6388	14.298	8.41391	10.9738	14.9162	9.48207	6.8291	14.6928	9.21797	10.6425	14.224	9.12702	9.06477
ENSG00000213401	MAGEA12	68.0998	66.5132	96.0317	96.1613	70.6516	94.8396	97.9366	61.0359	78.2087	85.7963	58.3013	83.1159	78.7603	55.5656	76.1965	81.2997	55.0579	84.9032	92.9236
ENSG00000213402	PTPRCAP	0.670357	0.871106	1.75755	0.687076	0.498947	0.584313	0	1.10829	1.73711	1.16934	0.727812	0.490212	0.541935	0.252999	1.48554	1.22788	0	0	0.640439
ENSG00000112715	VEGFA	12.249	12.2604	3.78093	4.42454	10.9583	7.28181	3.70887	12.6851	6.28838	9.62825	11.0508	7.05286	17.0579	12.0868	8.90146	10.1864	12.4359	9.0266	7.4828
ENSG00000070495	JMJD6	28.104	26.3575	12.3458	18.4217	29.3184	13.2392	14.9868	24.6468	10.391	25.4997	22.533	10.0652	24.4131	13.7554	12.0363	25.8973	23.0453	9.82516	15.6632
ENSG00000258405	ZNF578	0.110755	0.137345	0.078641	0	0	0	0.029323	0.34892	0	0.073569	0.233072	0.136462	0.124567	0.341029	0.135481	0.205777	0.41596	0.022163	0
ENSG00000090581	GNPTG	15.6468	14.5166	20.24	28.6907	14.9439	21.642	25.8107	15.0862	29.7033	32.6818	16.6893	27.121	35.9773	15.332	28.5296	38.0528	15.5547	30.4819	40.618
ENSG00000138468	SENP7	2.70647	2.45834	1.1133	1.70178	2.0764	2.0356	1.87885	4.20273	1.46344	2.47489	4.23045	1.68792	1.76489	3.78111	2.17396	2.82915	3.9924	1.59033	1.69743
ENSG00000164597	COG5	4.97228	5.7716	5.19612	5.12972	5.93588	4.70163	5.01844	6.67575	4.26839	6.02326	7.21338	5.5109	3.41769	6.29215	5.45227	4.98503	6.17099	5.22317	5.10944
ENSG00000164591	MYOZ3	0	0	0.046043	0.10987	0.014297	0.113625	0	0.014905	0.164094	0.058324	0.021889	0.014942	0.07467	0.014912	0.081433	0.063117	0.015984	0.058393	0.059927
ENSG00000148143	ZNF462	3.06387	4.52626	0.996924	1.55778	3.93042	1.59195	0.937235	2.84648	1.15833	1.84562	3.37598	0.742389	0.710441	2.83921	1.5854	2.29395	2.46518	0.855839	0.678099
Human_newGene_31654	Human_newGene_31654	2.08829	1.87549	1.44659	1.14644	2.10534	1.70073	1.00555	3.12196	1.26711	1.18851	2.84077	1.08155	0.738703	2.63164	1.82996	1.46822	2.30592	1.40305	0.567467
ENSG00000104112	SCG3	0.056389	0.08015	0.11101	0.072786	0.072369	0.131902	0.10705	0.284629	0.134675	0.168416	0.128045	0.184331	0.252016	0.090396	0.111945	0.204341	0.082594	0.15301	0.275857
Human_newGene_40861	Human_newGene_40861	1.54315	2.17978	2.61157	1.88667	2.97124	2.64368	1.65603	1.7963	4.68524	1.60193	1.38024	2.52997	1.06005	1.61229	4.0382	2.35402	1.40621	3.24452	1.44872
ENSG00000011677	GABRA3	2.39162	2.98459	2.9422	3.76483	2.48954	2.58164	2.81326	2.80819	2.57108	2.95416	2.67215	3.52203	2.54426	3.01986	3.07888	2.72169	3.06442	3.55992	3.4132
ENSG00000125285	SOX21	0	0	0	0	0	0	0	0	0.0406	0.017805	0	0.018529	0	0	0.01806	0	0	0	0
ENSG00000181852	RNF41	10.0464	7.92081	5.1353	4.92704	10.3344	6.77266	5.74926	9.98761	4.63005	5.91998	9.66038	4.78793	5.04408	9.94297	5.35385	6.67175	10.3443	3.98176	3.2629
ENSG00000181856	SLC2A4	0.75274	0.692804	0.262424	0.255158	0.39083	0.14435	0.221941	1.25287	0.434427	0.447953	1.57225	0.616406	0.621298	1.02996	0.903573	0.470636	1.38969	0.815951	0.571219
ENSG00000168930	TRIM49	0.17108	0.084743	0.030555	0	0.073245	0	0.027344	0.13976	0.078216	0.068222	0	0.065443	0.023554	0	0	0.06967	0	0.062001	0.204126
ENSG00000168936	TMEM129	6.98766	7.63581	5.1543	6.65146	6.75342	9.24421	7.72037	6.60606	10.1034	9.56578	6.77736	10.3578	11.6821	3.72219	10.1923	9.17039	7.4064	9.66846	7.83708
ENSG00000168939	SPRY3	0.151494	0.208889	0.086944	0.083005	0.353506	0.08389	0.052157	0.232538	0.197542	0.265332	0.253547	0.074157	0.159675	0.186938	0.238812	0.233483	0.338229	0.088508	0.097653
ENSG00000168938	PPIC	13.7453	14.7812	16.647	18.6805	16.5027	14.2187	17.5766	19.2879	24.1273	23.6464	19.7093	23.6268	22.0755	17.0763	22.755	23.0132	21.1202	23.3606	25.0561
ENSG00000197506	SLC28A3	0	0.033022	0.069784	0	0	0	0	0	0	0.010121	0	0.010533	0.030893	0	0.010266	0	0	0.009147	0
ENSG00000186086	NBPF6	2.07536	2.02311	1.63021	2.24808	2.01175	1.05768	0.679942	1.54723	0.79728	0.842516	1.46071	0.930173	0.89119	1.88171	1.12874	0.754052	1.37489	0.562676	0.728032
ENSG00000126883	NUP214	10.6423	9.67007	5.52451	6.66517	9.36375	5.9634	5.94769	9.20181	6.08501	7.01331	9.50053	5.14269	4.32426	9.18549	6.49088	6.91408	8.83192	5.31998	4.95664
ENSG00000126882	FAM78A	1.36691	1.61396	0.199308	0.233925	1.40676	0.190761	0.139884	2.00463	0.760547	1.5437	2.11065	0.315189	0.62499	2.03289	1.03352	1.34065	2.22793	0.386162	0.336859
ENSG00000186088	GSAP	0.694074	0.87517	0.90021	1.04876	0.898557	0.812657	0.887212	1.21571	1.66014	0.917132	1.55592	0.859474	0.926127	1.09716	0.898788	0.869508	1.02257	1.06947	0.885715
ENSG00000204928	GRXCR2	0.062966	0.091823	0.030699	0	0.028327	0	0	0	0	0	0	0.025711	0	0.050575	0	0.037077	0.062559	0	0
ENSG00000204923	FBXO48	0.893388	0.954607	1.15162	1.07389	1.10909	1.48144	1.09139	0.878413	1.31741	1.03862	0.845657	1.71529	0.799664	0.764337	1.53618	1.16283	1.02028	1.56698	1.03018
ENSG00000204922	UQCC3	7.46098	7.29016	4.95902	2.0958	7.24299	5.31863	3.76702	7.85438	5.64161	6.2818	8.47585	5.62199	4.96822	7.07113	5.89724	5.86822	8.09937	5.24806	3.79846
ENSG00000204920	ZNF155	2.25284	1.64302	0.726013	1.43657	1.26289	2.21041	1.30219	1.96738	1.69897	2.48569	1.32728	1.50066	1.33401	1.48725	1.73213	1.19786	1.29189	1.9745	0.987923
ENSG00000125846	ZNF133	0.816437	0.881395	0.841926	0.298516	0.874382	0.705813	0.806455	1.46799	1.61869	1.67252	1.41385	1.09084	0.684265	1.65868	0.646184	0.911894	1.01448	0.490711	0.370455
ENSG00000008441	NFIX	4.14322	5.79367	3.81009	3.31966	5.77458	2.5447	2.83538	7.51961	3.29258	5.51947	8.45491	3.68571	4.02552	7.83405	4.75243	6.21527	7.20953	3.59143	4.0437
ENSG00000182508	LHFPL1	0.031622	0.055691	0.030049	0	0	0.031055	0	0	0.067336	0	0.045284	0.107353	0.030416	0.060644	0.088261	0	0.065528	0	0.027718
ENSG00000182504	CEP97	4.1064	3.83491	1.46308	1.3051	3.80145	1.27227	1.31705	5.22295	1.7867	2.85628	4.80567	1.63624	1.61992	4.86337	2.56883	3.36981	4.71396	1.40654	1.54931
ENSG00000121542	SEC22A	7.30597	7.96375	4.39062	2.9549	7.55317	3.41814	5.29127	10.6902	5.04594	5.56339	11.1618	2.93933	4.16076	11.833	6.11541	5.94102	9.11825	3.82462	3.3412
ENSG00000167680	SEMA6B	22.3629	24.6759	28.195	21.5623	23.5234	25.8751	20.8821	33.6158	38.731	26.8719	34.8316	32.1288	25.047	33.1049	30.1982	28.6292	36.1106	37.5959	27.4559
Human_newGene_17337	Human_newGene_17337	0.050089	0.122427	0.251498	2.96325	0.483417	0.231656	0.720046	0.467599	0.261955	0.468395	0.36712	0.726563	0.119647	0.307031	0.487768	0.213373	0.392613	0.268566	0.394503
Human_newGene_30239	Human_newGene_30239	0	0.455448	0.132515	0.132811	0	0.061687	0	0	0	0	0.503987	0.129008	0	0	0.242263	0.264059	0.414008	0.054152	0
ENSG00000104808	DHDH	0.197325	0.542843	0.782583	0.186661	0.314203	1.28823	1.05617	1.53851	1.52519	0.858705	1.36227	1.991	1.07681	1.56596	1.94063	1.85337	1.44878	1.7494	0.807756
ENSG00000104805	NUCB1	43.1013	45.8927	69.6528	83.1873	48.1729	66.674	86.4062	60.3036	98.1156	90.0121	61.3082	96.7665	101.253	60.4401	91.0628	94.721	63.6208	98.1842	112.779
ENSG00000104804	TULP2	0	0.03379	0	0	0	0	0	0.076036	0.018683	0	0.015956	0	0.042269	0.068664	0	0.076037	0.056401	0.025486	0.019164
Human_newGene_8778	Human_newGene_8778	0.681167	0.770528	0.706124	0.831756	0.681085	1.46091	0.418087	0.833441	0.47677	0.981189	0.805046	1.05142	0.34148	1.51983	0.994327	1.00714	1.14444	0.905377	1.0895
ENSG00000167685	ZNF444	11.1759	11.1962	10.3061	8.52768	10.5331	10.0893	8.57926	7.80331	6.81426	7.88084	8.81413	4.85142	8.07042	7.66128	6.8741	6.48857	7.58527	6.54414	5.88981
ENSG00000106400	ZNHIT1	21.4824	21.9509	41.3448	43.5753	21.7827	38.4898	44.5495	17.2608	33.3555	24.9895	18.9643	35.4913	38.5954	19.6537	30.8458	26.8408	18.8078	32.1436	34.5949
ENSG00000177504	VCX2	1.38295	0.163773	3.77956	7.49678	1.51517	3.50258	7.44466	3.80588	5.72354	10.4063	2.30179	6.45238	11.7843	3.89823	8.28992	9.01155	4.31949	10.8769	14.5879
ENSG00000237412	PRSS56	0	0.042506	0	0	0	0	0	0.070908	0.052289	0.02899	0.046614	0.058059	0	0.04761	0	0.019958	0	0.037154	0.032214
ENSG00000177508	IRX3	2.75538	2.15742	0.551932	0.391633	1.66592	0.775418	0.59734	2.93819	1.67764	2.45674	1.7282	0.579971	2.03834	2.38592	1.97926	2.63298	1.78117	0.644163	0.960976
ENSG00000187840	EIF4EBP1	49.7264	50.0176	91.4521	72.0713	53.6321	87.4766	85.0694	38.9724	61.9273	41.1736	41.3694	58.966	49.8025	43.123	46.7351	38.4058	45.691	60.6929	51.2349
ENSG00000187848	P2RX2	0.319665	0.075438	0.098249	0.216658	0	0.305149	0.127539	0.163748	0.386568	0.142686	0.035421	0.189596	0.129859	0.170286	0.084478	0.289639	0.049077	0.051698	0.084235
ENSG00000123933	MXD4	4.98118	4.94105	5.30708	4.38075	5.96141	5.97864	4.56687	7.51136	7.82993	8.45488	9.02818	6.1259	8.96407	9.10783	9.36008	10.1092	9.15813	7.04349	6.12677
ENSG00000140526	ABHD2	18.1209	17.9589	7.79569	6.17203	18.1918	7.38105	5.16254	17.8048	7.88404	11.2429	17.0289	6.13662	6.68562	18.5829	9.55145	11.1017	17.1232	6.48011	4.78287
ENSG00000140527	WDR93	0.035172	0.069832	0.02021	0.023319	0.078257	0.10951	0.031256	0.201059	0.059503	0.098816	0.213755	0.041834	0.19493	0	0.05965	0.102	0.022857	0	0.018512
ENSG00000140525	FANCI	57.4706	54.8753	47.0532	31.9518	54.0245	48.0253	37.4631	60.9765	40.2965	33.0694	76.2617	48.194	26.8026	65.1801	62.7067	59.752	54.2308	50.7637	35.9996
ENSG00000140522	RLBP1	0	0	0	0	0	0.037711	0	0.050053	0	0.040992	0	0	0.056295	0	0.027719	0.029154	0	0.009714	0
ENSG00000140521	POLG	26.1582	28.9901	23.8365	25.9749	28.3299	20.2236	16.3623	26.4496	19.9362	21.3978	26.8757	19.5732	14.7784	25.5279	19.3012	20.5194	25.1399	17.9333	15.6807
ENSG00000167107	ACSF2	4.42643	4.49745	6.40595	5.44018	4.81018	6.69036	5.2404	6.45871	7.47156	5.06196	5.6501	7.05105	5.80553	6.72157	7.4118	6.11385	6.6407	7.62604	5.67125
ENSG00000167106	FAM102A	7.7513	7.97915	3.28677	3.10851	7.92603	3.05395	2.91442	7.8126	3.07405	7.40866	7.6455	2.02269	3.32398	7.41252	4.84203	6.50823	7.07095	1.94354	2.35355
ENSG00000167105	TMEM92	0.820616	0.873504	0.349099	0.250823	0.494379	0.201468	0.021304	0.600047	0.468365	0.775279	1.06854	0.180558	0.304069	0.585669	0.603912	0.865881	0.847418	0.290738	0.184771
ENSG00000167104	BPIFB6	0	0	0	0	0	0	0	0	0	0	0	0	0	0	0	0	0	0	0
ENSG00000167103	PIP5KL1	1.29071	1.29872	1.4683	0.840734	0.856164	1.03854	1.24421	1.22318	1.50716	1.12292	1.41509	1.32877	1.55976	1.12642	1.44774	0.987073	0.960285	1.38592	1.19519
ENSG00000167100	SAMD14	1.16375	0.80503	0.949521	0.917084	0.820219	0.869225	1.03634	1.69032	1.72306	1.42466	1.95031	2.02151	1.23063	1.86795	1.4705	1.57772	1.97875	1.69525	1.44089
ENSG00000166851	PLK1	94.6105	102.644	85.8793	36.9946	114.873	97.6815	42.0716	61.7256	24.3191	36.3269	93.1803	51.6802	31.8511	61.6727	27.2493	36.1642	93.4311	52.8409	30.5575
ENSG00000166856	GPR182	0.120797	0.08234	0.045088	0.419631	0.249967	0.096117	0.005671	0.224786	0.126864	0.03292	0.139017	0.130775	0.059003	0.424615	0.188112	0.146053	0.355107	0.140374	0.141913
ENSG00000166855	CLPX	17.0202	15.8817	6.76588	3.96562	16.1198	7.71317	3.40959	14.5359	5.2441	9.18471	13.8668	4.38196	5.85095	15.3247	6.62679	9.1752	14.7523	5.01996	3.83422
Human_newGene_2527	Human_newGene_2527	0.515165	1.51625	0.747876	0.816049	1.76602	0.785468	0.828426	1.03347	1.1585	0.862593	1.39745	0.816002	0.526452	1.60648	0.835194	0.90191	1.40296	0.892517	0.7849
Human_newGene_2520	Human_newGene_2520	9.85297	14.7712	6.31887	5.71926	14.7871	11.9392	13.838	9.94641	5.27202	10.1192	13.1646	14.3402	40.7043	10.7872	6.75235	11.2572	9.86892	13.268	31.0394
Human_newGene_2528	Human_newGene_2528	2.69483	2.31651	0.53589	1.23852	1.29299	0.742177	0.77283	1.41541	0.913967	0.541207	1.01188	0.909411	0.46777	1.48092	0.826496	0.590661	1.5903	0.76232	0.427233
ENSG00000163374	YY1AP1	24.1975	26.0359	15.1284	10.6579	27.1347	14.9698	9.76127	25.0847	11.2753	14.2552	23.6666	8.65758	11.0197	22.7383	12.8594	13.7185	26.3836	9.38512	7.96361
ENSG00000163376	KBTBD8	2.32845	1.20683	0.645065	0.678337	1.36905	0.637736	0.813394	0.886539	0.655164	0.917148	1.40478	0.595949	0.839302	0.788598	0.714036	1.02605	0.77035	0.983014	0.873069
ENSG00000163377	FAM19A4	0.529709	0.53698	0.229545	0.451213	0.41426	0.318798	0.306915	0.559641	0.355863	0.280551	0.770498	0.122996	0.139178	0.917173	0.247718	0.092014	0.719236	0.504427	0.189666
ENSG00000163378	EOGT	6.87823	6.96202	2.57884	3.76357	6.80619	2.34605	3.25105	10.9565	3.89808	6.42028	7.8661	2.50937	6.59958	8.11777	3.48709	5.58881	7.45887	3.08007	3.51611
ENSG00000276747	PADI6	0	0	0	0	0	0	0	0	0	0	0	0	0	0	0	0	0	0	0
Human_newGene_48261	Human_newGene_48261	0.726971	0.589079	0.282593	0.234871	0.629491	0.351828	0.049535	0.346701	0.108596	0.246603	0.1517	0.195668	0.429559	0.321438	0.330256	0.354739	0.618008	0.38615	0.129181
ENSG00000056586	RC3H2	7.06679	8.18785	3.53793	5.37371	7.00299	4.06323	3.69592	8.88191	4.65424	7.28571	8.15543	4.44003	3.57905	6.39579	5.31342	5.44013	8.16265	4.46059	3.97943
ENSG00000178882	RFLNA	0	0.039112	0.010272	0	0.009224	0.032679	0	0.096526	0.059499	0	0	0.010791	0	0.032309	0.042072	0.04425	0.050422	0.055793	0.033401
ENSG00000128849	CGNL1	1.71393	2.11722	0.736221	0.500849	2.06048	0.774414	0.510698	3.60702	1.05601	0.924417	3.31759	0.94443	0.396726	3.54482	0.910843	0.71454	2.80549	1.11082	0.446729
Human_newGene_5722	Human_newGene_5722	0.177236	0.25193	0.333901	0.557143	0.153857	0.266746	0.383165	0.221662	0.221994	0.191028	0.202528	0.385586	0	0.349061	0.479015	0.158288	0.282409	0.353124	0.1619
ENSG00000225526	MKRN2OS	0.231836	0.281223	0.099275	0.052111	0.472792	0.052987	0.128586	0.205448	0.164374	0.215181	0.295514	0.056317	0.132115	0.089119	0.100443	0.219672	0.162636	0.138167	0
ENSG00000225528	Z82206.1	0	0	0	0	0.074512	0.039479	0	0	0.042658	0.037415	0	0	0	0.104918	0.075775	0	0	0	0
ENSG00000157005	SST	0	0.150942	0	0.090898	0	0	0	0.203291	0.727276	0.480225	0.241331	0.166583	0.575422	0.332498	1.25833	0.55244	0.519743	0.488502	0.648081
ENSG00000184014	DENND5A	23.0946	22.6191	15.2353	12.1286	21.7508	16.2916	12.5523	29.5327	15.4892	15.645	30.0549	15.0832	9.9472	28.9198	16.9872	17.8433	28.3389	16.2013	12.5469
ENSG00000184012	TMPRSS2	0.050044	0.035988	0	0.023679	0.058351	0.016109	0.03258	0.047376	0.034371	0.203247	0.108101	0	0.113805	0.140054	0.015433	0.088489	0.134825	0.013797	0.106467
ENSG00000179820	MYADM	30.1821	30.6074	9.75415	8.54942	26.4991	17.0309	10.7974	27.548	12.0504	17.3983	34.2366	17.4961	28.8728	23.6018	14.0078	17.7873	22.906	11.1837	11.3169
ENSG00000179826	MRGPRX3	0.029443	0	0.064519	0	0	0	0	0	0	0	0	0	0.155111	0.035949	0.029521	0	0	0.103345	0
ENSG00000162426	SLC45A1	0.402899	0.539969	0.330648	0.099347	0.409239	0.133979	0.078678	1.31293	0.396551	0.359349	0.738328	0.089238	0.561092	0.940336	0.400275	0.38945	1.27203	0.23556	0.263319
Human_newGene_13469	Human_newGene_13469	0.501426	0.617719	1.34345	1.02129	0.191006	0.957492	1.50133	0.11865	1.52891	1.53574	0.688337	0.743927	1.43424	0.421454	1.97972	1.87358	0.356578	1.77916	1.19345
Human_newGene_13463	Human_newGene_13463	0.028342	0.040597	0.276367	0.277527	0.034436	0.55719	0.541592	0.017951	0.214251	0.354838	0.02549	0.826472	0.749512	0	0.213844	0.302081	0.03562	0.940968	0.636556
Human_newGene_16525	Human_newGene_16525	0.613677	0.770923	0.336373	0.505104	0.964241	1.60573	0.557965	0.382001	0.628439	0.529345	1.06738	0.339865	0.472179	0.516881	0.436386	0.634531	0.611067	0.378504	0.270345
ENSG00000204116	CHIC1	5.56529	4.82351	1.29149	1.38845	4.49827	2.47591	0.966075	4.71282	1.11254	2.56058	4.18371	1.11668	1.18635	5.16574	2.12371	2.27316	4.93613	1.00817	0.982855
ENSG00000137145	DENND4C	2.49384	2.07747	0.663347	0.691943	1.91354	1.18293	0.766267	2.47554	0.807312	2.4854	2.72397	0.654749	1.1746	2.58992	1.51435	3.11969	2.44067	0.737123	0.778384
ENSG00000137142	IGFBPL1	2.08922	1.82041	1.39915	1.48463	1.5752	1.94967	1.24928	3.63765	2.16975	2.33921	3.31963	2.03903	2.3881	2.54551	2.3368	2.48197	2.98254	2.23115	1.3616
ENSG00000173976	RAX2	0	0	0	0	0	0	0.049002	0	0	0	0	0	0.013296	0	0	0	0	0.017592	0
Human_newGene_20908	Human_newGene_20908	0.387182	0.510262	0.187127	0.102556	0.421625	0.139624	0.036577	0.386761	0.344829	0.397804	0.465165	0.483161	0.136224	0.441388	0.33171	1.18891	0.561015	0.135992	0.092753
Human_newGene_20909	Human_newGene_20909	0.265008	0.479682	0.317547	0.030936	0.285542	0.164678	0.394759	0.268076	0.555748	0.139847	0.289316	0.222527	0	0.238259	0.158982	0.153217	0.186163	0.193488	0.128013
ENSG00000270379	HEATR9	0	0.021058	0.055751	0.011624	0	0	0	0	0.023629	0	0	0	0.032786	0.038541	0.025416	0	0.010394	0	0.02202
ENSG00000100077	GRK3	10.3637	9.88823	5.79802	5.47398	9.74695	5.6187	4.72644	9.3078	4.54219	6.34356	9.538	4.59769	3.77183	9.0994	5.04402	6.26145	8.59528	4.38433	3.70273
ENSG00000278588	HIST1H2BI	0	0	0	0	0	0	0	0	0.142094	0	0	0.01351	0	0	0	0.276996	0	0	0
ENSG00000001561	ENPP4	2.64308	2.62664	1.39146	1.09427	2.64882	1.42245	1.10508	3.37053	1.98471	2.01476	3.28036	1.71857	1.40785	2.96926	2.2397	2.54328	2.98172	1.78021	1.84033
ENSG00000159128	IFNGR2	20.2535	19.6497	9.05097	5.50896	23.6049	8.95367	5.44284	25.9959	11.9555	13.6728	27.3609	10.6083	12.8776	24.9556	13.6782	15.1563	25.9429	9.53613	8.45191
ENSG00000112964	GHR	2.62428	2.27073	1.08423	0.9644	2.08548	0.922885	0.886272	2.30089	1.11711	0.907618	2.19372	0.948256	0.622184	2.63316	1.08754	0.992409	2.50405	0.779428	0.760726
ENSG00000122912	SLC25A16	3.30465	3.10597	3.37959	3.35048	3.7572	2.82293	4.11562	3.86904	3.44505	4.37588	3.4971	2.95092	3.57771	4.41131	3.27974	4.2652	3.54968	3.48891	3.99178
ENSG00000130227	XPO7	18.9819	19.6142	13.1354	7.47598	22.9883	11.9234	6.69776	24.1087	8.85138	12.109	22.7837	9.39961	5.85594	18.0933	11.2465	12.0546	22.0121	9.58234	5.85693
Human_newGene_6997	Human_newGene_6997	0.455152	0.86546	1.50741	1.03381	0.699342	0.734159	0.495881	1.25084	0.599979	0.296688	0.904752	0.426913	0.246874	0.629778	0.395267	0.172314	0.452341	0.632103	0.476003
ENSG00000253251	SHLD3	4.32453	5.25872	2.58894	2.16354	4.84905	3.57927	2.49656	4.11727	2.85288	3.15772	3.79419	3.09667	2.57215	4.34074	3.09138	2.92234	4.22028	2.88614	2.54862
ENSG00000129038	LOXL1	5.83148	6.18509	7.71505	7.05908	5.77214	8.77984	8.27102	11.7177	18.7751	13.5671	11.7095	14.1349	16.0905	11.266	18.2904	14.6813	12.5395	17.4647	16.5
ENSG00000154065	ANKRD29	1.49696	1.95271	2.10446	0.772969	2.48401	1.52305	1.6723	3.19328	1.39091	2.61279	3.00079	2.2791	1.80469	3.66871	1.57735	2.03924	3.38107	1.83712	1.4444
ENSG00000107798	LIPA	17.6383	18.3819	17.4389	20.2155	17.1097	16.0342	21.9183	20.769	22.3866	22.7193	19.6918	21.2956	21.5232	21.755	25.3235	22.2273	20.6297	20.7039	24.5808
Human_newGene_36155	Human_newGene_36155	1.06889	1.2333	0.734045	0.216019	0.787909	0.302133	0.590159	0.739653	0.451306	0.739384	1.06058	0.582844	0.805224	1.00933	0.635129	0.672264	0.881033	0.573406	0.402331
Human_newGene_46472	Human_newGene_46472	0.125725	0	0.534737	1.17941	0.183134	0.378974	1.18804	0.20375	0.204177	0.297044	0	0.164004	0.210841	0	0.30436	0	0.047483	0.413883	0.417134
Human_newGene_34056	Human_newGene_34056	0.054083	0.145553	0.88722	0.680365	0.120541	1.2143	0.387413	0.157218	0.6067	0.623024	0.18796	0.565084	0.278852	0.202146	0.742441	0.562439	0.206068	0.665448	0.353855
Human_newGene_50132	Human_newGene_50132	0.172641	0.24219	0.175285	0.098326	0.607037	0.227692	0.275949	0.789417	0	0.345017	0.494351	0.19786	0.197027	0.555253	0.314349	0.100256	0.720758	0.168521	0
ENSG00000117477	CCDC181	2.10005	2.28312	0.822249	0.758769	2.19843	1.58169	0.827068	2.20485	1.25674	1.07907	1.98661	0.85825	0.862887	1.87943	1.21027	1.00803	1.76004	0.781781	0.770116
ENSG00000120519	SLC10A7	2.20694	2.22128	0.791885	0.688681	1.27644	0.281464	0.273762	1.94796	0.888589	1.2098	2.30392	0.556608	0.87361	2.11301	1.06799	0.93884	2.29129	0.722739	0.842333
Human_newGene_21750	Human_newGene_21750	0.409616	0.14254	0.795809	0.941381	0.209668	1.05156	0.480536	0.205216	1.29724	0.97962	0.098599	1.60015	0.785814	0.34936	1.3849	1.03946	0.223971	1.49604	1.40541
ENSG00000155330	C16orf87	2.54418	2.6697	1.13891	0.267409	2.15643	1.13774	0.423794	3.06019	0.878819	2.18109	3.068	0.397154	0.705697	2.57943	1.09194	2.27524	2.61122	0.807088	0.693016
Human_newGene_21287	Human_newGene_21287	0	0.25797	0	0	0.651976	0	0	0.161128	0	0.054716	0	0.05694	0	0	0.157105	0	0.304146	0.14835	0
Human_newGene_21284	Human_newGene_21284	0	0.071755	0.081343	0.475326	0	0.120443	0.226116	0.056449	0.086759	0.074575	0.076722	0.050052	0.03919	0.039516	0.168017	0.024832	0.042356	0.034387	0.035713
ENSG00000037749	MFAP3	7.79191	12.5789	6.68983	6.84907	6.7207	3.47646	4.87289	6.05245	8.9615	9.69379	15.2506	5.58842	7.46053	15.5558	9.53963	9.79595	10.6489	3.48822	7.5361
Human_newGene_25993	Human_newGene_25993	0.218533	0.257477	0.715958	8.28059	0.392111	13.9221	8.84607	0.307986	5.48013	10.918	0.657966	3.45274	13.0482	0.484656	3.09451	8.15279	0.280234	13.7917	13.8612
Human_newGene_25996	Human_newGene_25996	3.40179	4.60755	3.96564	9.59933	3.68837	8.02464	10.5787	2.32529	4.48159	8.51642	2.1513	11.4885	9.35892	1.88454	5.02881	7.5198	1.89681	9.57025	17.162
Human_newGene_25997	Human_newGene_25997	14.1039	10.8917	5.52481	5.82211	12.7442	5.15927	4.81919	10.6186	4.30625	8.1498	10.6186	5.85469	4.64633	7.31884	6.24925	6.84484	7.69758	3.88383	4.03383
Human_newGene_25994	Human_newGene_25994	10.0817	7.62723	9.57961	16.9026	6.24607	13.7125	23.5585	6.14207	11.9212	23.3808	6.70576	23.6197	19.3636	5.50786	11.4904	18.2207	6.60326	16.8728	30.9753
Human_newGene_25995	Human_newGene_25995	0	0	0	0	0	0	0	0	0.288505	0.321531	0	0.994074	1.20188	0.126641	0	0.67732	0	0	2.50219
Human_newGene_25998	Human_newGene_25998	2.9622	2.40523	1.734	1.44557	2.27815	1.73697	1.52293	3.59532	1.70473	3.28402	3.78889	1.83159	1.70505	3.27551	3.36093	3.99473	4.87284	2.30479	2.18027
ENSG00000170522	ELOVL6	7.72006	7.61441	4.53769	2.48359	7.08237	4.34562	2.41733	12.2744	4.18486	4.51196	11.3597	4.207	1.98057	10.751	5.19111	4.93581	10.1862	3.84472	1.89711
ENSG00000170525	PFKFB3	24.4121	24.5877	7.10432	7.38936	23.9133	9.31747	4.66554	25.1511	5.93997	10.1109	27.3618	4.40977	8.96331	21.4161	6.48534	11.203	27.9791	9.71985	5.66636
ENSG00000198553	KCNRG	0.283168	0.044934	0	0.361041	0.2103	0.144066	0	0.111986	0.129257	0.306728	0.137452	0.073354	0.105357	0.109621	0.158493	0.195075	0.08785	0.027543	0.099456
ENSG00000198551	ZNF627	2.48046	2.16148	0.490957	0.904008	1.45324	1.10093	0.446851	1.76779	1.31214	1.98117	2.08567	0.482314	1.44428	1.67384	1.61853	2.03852	1.82619	0.431137	0.928729
ENSG00000198556	ZNF789	2.18015	2.58817	2.53667	1.78877	2.44737	1.75475	1.70545	2.38648	2.45092	3.14399	2.51149	3.54305	2.80774	2.30691	2.32453	2.39635	2.4425	2.53295	2.16782
ENSG00000198554	WDHD1	13.2463	12.857	10.149	7.38207	11.7257	7.15803	5.18967	17.0931	7.19694	7.92751	17.1225	5.95222	2.96419	16.5249	9.68638	8.5664	15.0207	7.56778	5.37061
Human_newGene_34660	Human_newGene_34660	2.51146	2.55679	1.00904	1.31431	2.03624	1.19127	1.58256	1.6369	0.935212	1.44795	2.29024	1.05432	2.01768	2.28858	0.935643	1.79728	2.10505	0.916407	1.19752
ENSG00000075223	SEMA3C	3.89485	4.11278	2.28155	1.72544	3.4067	1.93286	1.62314	2.7649	1.92647	1.81951	2.83467	1.35935	1.27882	2.9386	2.68557	1.99083	2.15286	1.71678	1.37458
ENSG00000164542	KIAA0895	3.49275	3.27906	0.61185	0.769609	3.23289	0.517208	0.365578	3.93151	1.34438	2.90614	3.00558	0.786576	1.56233	3.81071	2.70511	2.71981	3.40843	0.811194	0.969087
ENSG00000160714	UBE2Q1	21.9828	21.6848	15.1912	10.7195	21.9457	15.1009	12.2558	22.5393	16.0307	17.2536	21.3634	16.5011	17.323	22.8761	16.3931	16.1546	21.1178	16.1802	13.583
ENSG00000160712	IL6R	1.21552	1.2836	1.05893	1.97505	1.46281	0.708193	0.618364	1.27941	0.5281	1.38426	1.07377	0.788271	1.48986	0.882099	1.06612	1.53003	1.23228	0.821759	1.35861
ENSG00000160710	ADAR	47.036	47.1267	28.9789	20.3536	34.3539	19.4944	15.3297	36.1501	20.8904	36.3483	45.7608	15.9453	15.4007	47.4264	34.7405	36.1687	44.116	17.0836	23.0346
ENSG00000096088	PGC	0	0	0	0	0	0.049172	0	0	0	0.042937	0	0	0.026346	0.032449	0	0	0	0	0
ENSG00000136950	ARPC5L	31.4687	34.139	26.316	14.8334	32.7418	24.8027	15.2071	28.1519	19.5169	23.3864	27.7098	18.959	21.0249	29.8971	22.3415	20.8585	26.494	20.0465	14.9127
ENSG00000083307	GRHL2	0	0.008903	0	0	0.046692	0	0	0.029404	0	0	0.009596	0	0	0.048831	0	0	0.01051	0.016932	0
ENSG00000096080	MRPS18A	36.2976	35.7065	38.1834	22.8498	34.3484	39.6563	21.0703	31.1226	23.4485	19.2194	29.1515	21.2277	22.1978	28.2905	21.5594	20.5399	31.0203	23.526	17.5212
ENSG00000175467	SART1	48.785	46.5588	53.0184	47.9074	46.0278	63.1924	55.1591	43.108	48.0303	41.7263	43.7999	50.1926	44.6539	44.5999	39.0439	38.6716	43.6516	52.415	46.8618
Human_newGene_20486	Human_newGene_20486	1.5959	1.6792	0.373501	0.628964	2.24705	0.961209	0.268457	1.17729	0.13619	0.500803	1.83101	0.682271	0.069239	2.13217	1.3235	0.390904	1.77793	0.631381	0.119692
ENSG00000175463	TBC1D10C	0.157705	0.023576	0.07485	0.152162	0.094042	0.287781	0	0.174692	0.290389	0.146614	0.126307	0.246205	0.445645	0.202485	0.410207	0.268245	0.075892	0.265673	0.234827
ENSG00000105402	NAPA	21.9362	19.9957	25.1903	23.3676	17.6912	25.6347	27.1526	13.8354	21.5876	15.789	14.0321	18.8787	19.8328	15.9571	20.272	16.2968	16.7524	19.0466	20.4726
ENSG00000105401	CDC37	103.08	111.316	177.774	218.182	104.178	158.062	212.795	83.943	134.248	157.857	82.8237	133.572	155.915	84.2421	126.735	154.162	86.878	140.547	166.304
ENSG00000143867	OSR1	0.279172	0.299858	0.105419	0.231741	0.228962	0.199883	0.351327	0.496498	0.116321	0.509791	0.387865	0.132585	0.485098	0.332124	0.271846	0.53958	0.333336	0.186031	0.273145
ENSG00000105404	RABAC1	31.8487	35.9294	74.3587	100.392	37.7066	82.4776	89.0333	36.0742	81.9441	82.5555	42.6491	82.1945	117.644	39.4353	75.546	66.1124	34.1043	80.7596	115.046
ENSG00000131459	GFPT2	10.6622	10.9384	8.24862	9.75486	11.4025	9.84419	9.06148	7.83235	6.69132	14.4073	7.62929	5.34851	10.3681	8.82127	7.02497	13.9733	7.75931	6.15648	7.50164
ENSG00000105409	ATP1A3	3.71196	4.45394	3.62542	4.15811	3.98252	3.94624	4.04128	5.83939	5.76385	6.28598	5.76637	5.30838	4.80125	5.83726	5.2468	6.15512	5.79319	5.25407	6.20105
ENSG00000135917	SLC19A3	0.267372	0.169877	0.070957	0.109229	0.239581	0.122924	0.033942	0.366716	0.032435	0.303535	0.334121	0.039474	0.092433	0.251526	0.081438	0.291975	0.318153	0.129924	0.097406
ENSG00000181218	HIST3H2A	0	0	0	0	0	0	0	0.057373	0	0	0	0	0	0	0	0	0	0	0
ENSG00000132185	FCRLA	0.045764	0.058449	0	0.042875	0	0	0.075121	0.035748	0.129961	0.062824	0.031926	0.065378	0.279397	0.059285	0.031649	0.152372	0.060375	0.066083	0.1648
ENSG00000108639	SYNGR2	43.6825	47.5459	34.8501	28.7079	31.1345	29.8659	30.8221	36.6882	39.3124	21.6409	37.8764	24.0168	28.5892	35.5567	34.3123	21.1728	28.0153	35.5166	20.3247
ENSG00000132182	NUP210	16.1699	17.585	14.8606	10.9555	17.3687	14.946	11.6209	19.3846	16.1296	10.2045	19.162	15.2689	7.96526	18.4019	15.9637	11.8549	20.7759	15.106	9.03124
ENSG00000222009	BTBD19	8.31834	10.0881	4.05016	4.65908	9.64239	4.4062	3.10549	4.83721	6.19829	6.49136	4.26605	4.02904	3.90902	6.16592	7.4372	6.50979	4.66368	2.68994	4.11013
ENSG00000014914	MTMR11	5.36564	5.49417	5.25201	5.75587	5.85191	4.80835	5.50354	5.75977	5.99873	5.4435	4.9543	4.767	4.81436	5.28431	6.257	5.22577	5.96237	5.67427	4.80222
Human_newGene_23595	Human_newGene_23595	0	0	0	0	0	0.115121	0	0	0.490379	0	0	0	0	0	0	0	0	0	0
Human_newGene_44493	Human_newGene_44493	0.124003	0	0.115234	0.583229	0.057071	0.297774	0.104444	0	0.225104	0	0	0.059646	0.059035	0	0.033074	0.061145	0.063804	0	0.179403
ENSG00000014919	COX15	27.2067	23.7258	18.234	11.9834	25.6896	18.0209	12.4418	22.1945	13.9831	14.7541	22.4505	14.4869	10.7687	20.1844	16.5536	14.9608	19.2499	13.0461	10.3626
ENSG00000135205	CCDC146	0.227369	0.168886	0.217564	0	0.300075	0.124007	0.079854	0.244636	0.126447	0.362478	0.890764	0.255325	0.104002	0.25969	0.19388	0.395349	0.285508	0.444699	0.327365
Human_newGene_41123	Human_newGene_41123	0	0	0.218603	0	0	0.112	0.242842	0.110191	0.830978	0	0	0	0	0	0	0	0.106345	0.24366	0.189296
ENSG00000131981	LGALS3	15.6159	14.69	25.0509	26.6224	14.986	22.5666	26.9478	11.6796	18.4283	19.4836	13.2884	22.1671	27.0024	14.083	16.7147	20.6191	13.5911	20.2847	21.5211
ENSG00000188021	UBQLN2	16.4093	17.2434	15.2287	10.3887	15.3291	15.6	9.33962	16.9024	20.286	14.5247	15.2032	15.852	12.6715	16.7409	20.1064	15.1537	14.1899	16.2034	12.8628
ENSG00000188026	RILPL1	3.46948	3.28601	1.87871	1.10418	3.17773	1.96123	1.217	3.57046	1.49341	2.60619	4.41366	1.49521	1.94138	3.81462	2.19262	2.79428	4.46367	1.81646	1.35361
ENSG00000086065	CHMP5	50.1398	50.5956	59.7793	78.0087	52.4418	68.2814	82.4217	51.6674	69.3768	75.031	49.2425	72.0311	84.6587	52.5099	70.4961	68.891	58.8357	70.4265	83.5704
ENSG00000166337	TAF10	10.4873	11.4203	27.0519	39.2516	11.6531	29.4694	39.581	14.3908	39.5264	35.885	14.7639	37.6138	50.4012	16.3401	30.1781	37.7193	15.276	41.9483	49.7238
ENSG00000240747	KRBOX1	0	0	0.067425	0.038085	0	0.068999	0	0.010006	0	0.000599	0	0.100747	0	0.223061	0.040459	0.026166	0.000737	0.017421	0.021546
ENSG00000084652	TXLNA	52.1286	53.6677	19.6577	20.2177	53.8974	20.1019	15.9202	50.3253	20.4224	28.6019	50.7076	15.9697	23.0698	48.0669	25.0379	27.7896	47.5916	15.9699	16.8111
ENSG00000214694	ARHGEF33	0.641053	0.755893	0.595755	1.02373	0.656202	0.665221	0.699507	0.722753	0.946069	0.752437	0.868417	0.989724	1.13145	0.996543	1.07643	0.611747	0.84926	1.14037	0.782211
ENSG00000172167	MTBP	7.78921	7.36982	5.48645	3.31045	7.08227	4.82729	3.69868	7.41106	3.40497	4.07457	7.02256	4.42336	2.00973	7.82967	3.70276	3.9404	7.95522	3.61608	2.318
ENSG00000172164	SNTB1	0.152384	0.325733	0.060049	0.061017	0.619663	0.266812	0.10476	0.479815	0.161951	0.093965	0.439835	0.118817	0.036504	0.807812	0.186697	0.111857	0.256719	0.134293	0.071422
Human_newGene_6174	Human_newGene_6174	0.390409	0.25523	0.346107	0.246487	0.548264	0.686264	0.245875	0.568089	0.397049	0.816358	0.732408	0.42422	0.32141	0.677658	0.494973	0.59274	0.975706	0.552328	0.259056
Human_newGene_6175	Human_newGene_6175	0	0.219835	0.31724	0	0.098505	0	0	0	0	0	0	0	0.402822	0	0	0.059335	0	0	0
ENSG00000148386	LCN9	0	0	0	0	0	0	0	0	0	0	0	0	0	0	0	0	0	0	0
ENSG00000148384	INPP5E	2.43841	3.28294	2.25604	1.89898	3.06494	2.14029	1.94908	3.19123	2.08527	2.24404	3.61594	2.50248	2.36097	3.35142	2.16984	2.46325	4.17253	2.21267	1.79891
Human_newGene_39645	Human_newGene_39645	0.677452	0.681178	0.430529	0.564984	0.646218	1.06139	0.370173	0.632596	1.13945	0.379592	1.07995	0.61012	0.600251	1.05113	0.410483	0.840475	1.54656	0.838428	0.228513
Human_newGene_39641	Human_newGene_39641	0.212786	0.15876	0.526552	0.160006	0.245917	0.41409	0.894827	0.305855	0.24946	0.023234	0	0.502315	0	0.1651	0.142887	0.118713	0.398171	0.442417	0.225153
ENSG00000020426	MNAT1	12.8913	11.779	14.4702	8.77905	12.8925	14.3332	10.1007	11.9507	8.33629	6.21421	12.6425	10.6538	5.73519	12.3235	10.2929	6.61932	10.9472	9.74057	5.5503
Human_newGene_33414	Human_newGene_33414	0.356122	0.525023	0.606634	0.058699	1.61373	1.24802	0.244738	0.220385	0.097398	0.155057	0.102437	0.578978	0.334834	0.231126	0.38004	0.220555	0.421911	0.046712	0
Human_newGene_33410	Human_newGene_33410	4.88825	4.25594	2.51508	2.10141	3.139	2.42813	1.89441	3.14095	1.62514	1.8826	3.95422	1.85108	0.777176	3.62308	2.65898	1.85071	4.25262	1.87174	1.03438
ENSG00000101871	MID1	0.393459	0.243104	0.154919	0.121577	0.499593	0.140836	0.114239	0.362375	0.114066	0.099238	0.429336	0.134652	0.02759	0.461413	0.189678	0.109514	0.769487	0.095082	0.08907
Human_newGene_37565	Human_newGene_37565	0.859847	0.814879	0.331105	1.11828	0.99639	0.449005	0.61509	0.521115	0.373257	0.563656	0.6365	0.504345	0.331355	0.500137	0.577579	0.520886	0.471707	0.343073	0.420942
ENSG00000138111	MFSD13A	2.63515	3.88045	3.35975	2.25653	3.58669	3.19366	2.6538	2.34362	2.5088	2.62231	3.47111	2.46332	2.0373	3.33952	2.31078	2.70487	2.87488	1.6785	1.90348
ENSG00000172789	HOXC5	0.317429	0.620585	0.292927	0.108926	0.513319	0.241152	0.146907	0.404534	0.286081	0.378633	0.393433	0.503213	0.244427	0.424757	0.334572	0.478662	0.389496	0.350944	0.223684
ENSG00000172785	CBWD1	15.5753	14.4827	26.676	27.1632	16.255	24.55	25.671	16.0985	21.9619	15.6394	14.9082	22.3884	18.9239	15.8699	19.0717	16.6179	16.0834	22.5462	19.503
Human_newGene_45140	Human_newGene_45140	0	0.13436	0.08209	0	0.258609	0.143722	0.139603	0.745793	0.326115	0	0.317915	0.044181	0.047436	0.311081	0.331332	0.172872	0.349469	0.098921	0.121601
ENSG00000172782	FADS6	0	0.128222	0	0	0	0.070987	0.027458	0.273843	0.026181	0.099566	0.113314	0.070996	0.111348	0.213026	0.069876	0.094969	0.419259	0.093748	0.089809
ENSG00000172780	RAB43	3.57689	4.40258	1.74367	1.32955	4.19384	2.03647	1.41436	2.00322	1.34005	4.22151	0.873363	0.989455	4.53473	3.69645	1.98036	4.68288	4.61695	1.26058	2.10782
ENSG00000150201	FXYD4	0	0	0	0	0	0.017969	0.026983	0	0	0	0	0	0.081425	0	0	0.011657	0	0.03321	0
ENSG00000144724	PTPRG	10.3582	9.56475	5.8267	7.81619	10.2963	6.12614	5.87594	10.3842	6.47035	5.68476	9.90621	6.31991	4.37075	10.2924	5.52875	5.88924	9.57248	6.22728	5.76995
Human_newGene_44816	Human_newGene_44816	0.423615	0.730891	0.491847	0.103461	0.924246	0.388227	0.056372	0.398673	0.575786	0.319013	0.355849	0.35636	0.228007	0.352595	0.584304	0.357672	0.290859	0.369651	0.273096
Human_newGene_44817	Human_newGene_44817	0	0	0.152745	0	0.295431	0	0.2965	0.187064	0.044108	0	0.182369	0	0	0	0.060249	0.277111	0	0.413916	0.162024
ENSG00000196924	FLNA	387.839	411.92	402.227	562.95	361.79	381.762	535.665	322.458	351.53	361.724	314.585	332.587	357.765	304.596	330.287	370.074	326.42	339.553	420.934
ENSG00000196923	PDLIM7	60.2123	70.7265	94.0281	83.7574	62.5459	84.0701	90.9281	45.928	67.7572	62.71	49.473	68.4697	73.6367	48.0996	61.1863	59.8398	51.2986	71.88	62.835
ENSG00000174780	SRP72	54.2914	51.7721	54.8624	48.1362	54.0412	59.9129	40.8754	55.2848	61.2796	37.1967	51.9974	56.2662	32.2425	54.5487	49.9078	38.5525	52.2052	52.4709	37.0896
Human_newGene_49798	Human_newGene_49798	1.39819	1.51362	3.70423	6.29746	1.74229	4.34787	4.24771	1.70636	4.01883	4.02052	1.86856	3.13175	5.34415	1.71348	3.74348	5.00113	1.58828	3.95962	5.07132
ENSG00000173786	CNP	27.8904	26.7336	28.2971	11.7784	23.9289	12.099	16.1046	26.5475	26.6665	13.7907	23.676	13.4541	8.95616	13.1962	11.3787	23.2557	14.1552	22.9603	22.1412
ENSG00000117877	CD3EAP	11.7375	13.2519	5.79439	3.2379	10.8412	5.15855	3.14189	7.40824	4.31654	6.65434	10.0449	4.10268	2.68911	7.85571	5.89751	7.08857	16.6887	3.09675	3.09029
ENSG00000232125	DYTN	0	0	0	0	0	0	0	0	0	0	0	0	0	0	0	0	0	0	0
ENSG00000174255	ZNF80	0	0.018875	0	0	0.059796	0	0	0.045995	0	0.020017	0	0	0.012783	0	0	0	0	0	0
ENSG00000116473	RAP1A	19.1096	25.3123	13.8487	14.733	15.6744	36.0095	37.5367	18.4103	17.1285	22.79	15.6977	13.4759	6.68409	21.1444	16.7787	14.1817	16.5054	11.5211	7.66724
ENSG00000112996	MRPS30	26.8744	28.1849	25.2998	14.1963	25.9376	21.5081	14.2778	23.5813	17.6258	19.2619	23.3785	14.1545	15.7515	26.2499	17.4832	19.8473	24.4162	16.4172	12.9217
ENSG00000112992	NNT	7.31267	8.1614	6.48818	4.97051	8.03399	6.83635	3.9438	10.652	8.21545	7.01197	10.0484	7.733	4.99551	9.81056	10.1435	6.81714	9.91994	7.78547	5.61208
ENSG00000116478	HDAC1	53.706	52.7701	75.273	93.9491	54.9398	74.5281	90.5347	61.3477	87.2508	92.7717	61.4796	86.4006	82.0504	64.1864	82.9443	96.0853	60.0819	80.8299	92.3511
ENSG00000247626	MARS2	8.44511	7.68817	1.98556	1.58651	7.75753	2.08767	1.48042	6.57462	2.21101	3.60464	6.48805	2.26874	2.52052	7.23321	2.91127	4.34098	5.56297	1.86452	1.99873
Human_newGene_31925	Human_newGene_31925	0	0.396801	0.607452	0.123362	0.13882	0.103706	0.522033	0.684096	0.864261	0.685305	0.323638	0.73405	0.450865	0.577967	0.374326	0.531926	0.338937	0.948237	0.777406
Human_newGene_31923	Human_newGene_31923	0	0	0	0	0	0	0	0	0	0	0	0	0	0	0	0	0.676673	0	0
ENSG00000223658	C1GALT1C1L	2.55974	2.57547	3.16668	1.72104	3.66003	3.3555	1.8016	3.3222	4.50796	3.43612	3.10759	3.8654	3.49023	4.18287	4.21246	3.42991	3.96231	2.43667	2.34593
ENSG00000099866	MADCAM1	0.316102	0.276121	0.295775	0.18225	0.307201	0.589124	0.432805	0.50022	0.536952	0.464074	0.214555	0.404339	0.211798	0.385641	0.634203	0.666709	0.258095	0.387759	0.305597
ENSG00000151150	ANK3	0.679174	0.84967	0.211527	0.251998	0.567296	0.106904	0.404008	1.78717	0.257863	0.364863	1.37118	0.211125	0.055597	1.23271	0.418148	0.391864	1.85769	0.682335	0.152224
ENSG00000099864	PALM	10.176	11.2216	13.6898	9.73154	12.2003	12.3541	10.3219	17.0878	17.293	12.7547	17.9366	14.7971	13.7866	17.8148	15.256	12.8246	16.6828	17.7256	12.7456
ENSG00000099860	GADD45B	28.8657	39.4314	17.9244	19.3941	30.5523	31.9174	57.6344	45.1142	18.8618	34.7245	41.1434	62.8259	92.653	37.4874	13.9193	32.5593	58.7183	55.9748	98.2235
ENSG00000021488	SLC7A9	0	0.232926	0	0	0.052526	0.046845	0.03269	0.035002	0	0.056176	0.055149	0	0	0.072562	0	0.094294	0.020922	0.098702	0
Human_newGene_44368	Human_newGene_44368	1.72878	0.96428	1.73497	0.847575	1.30987	1.48671	1.02973	1.13945	1.01202	0.78484	0.900988	1.6393	0.841387	0.756532	0.736724	1.03975	1.85723	1.22099	0.455701
ENSG00000106244	PDAP1	54.9112	55.2983	97.9972	127.151	55.7825	102.759	130.773	49.0042	76.1703	71.6142	50.6251	88.8039	87.9375	50.0393	71.0641	69.8334	51.8409	89.2655	98.0466
ENSG00000072210	ALDH3A2	6.27738	15.2055	9.4569	4.03188	9.74258	8.33765	2.91071	11.1318	7.28799	8.12598	9.83284	7.44663	5.41504	5.63768	9.1174	5.24925	10.3308	4.55278	5.64234
ENSG00000166484	MAPK7	6.56725	7.46376	8.43013	6.24909	9.00281	7.0764	5.43997	6.55875	9.98881	9.17276	7.41879	4.57475	6.87166	8.3335	8.94164	9.71538	7.02067	4.40545	5.19932
ENSG00000266173	STRADA	8.95893	12.9892	4.60342	4.2	8.47389	4.33679	2.92014	11.8029	3.43465	5.8567	10.9157	2.35174	2.80635	10.1897	4.3443	4.88635	9.64114	2.44114	3.49445
Human_newGene_44360	Human_newGene_44360	0	0	0	0	0	0.815496	0	0	0	0	0	0	0	0	0	0	0	0	0
ENSG00000269307	AC010463.1	0	0.155215	0	0	0	0	0	0	0	0	0	0	0	0	0	0	0.261639	0	0
ENSG00000100836	PABPN1	33.608	31.719	25.1765	19.1133	32.2875	25.7973	18.0287	28.1606	23.1508	22.8382	24.5576	23.1234	20.796	24.3534	25.75	25.7598	29.0242	26.4745	19.0049
Human_newGene_42917	Human_newGene_42917	0	0.049863	0.063592	0.173569	0.030322	0.098069	0	0.176169	0.313868	0.083756	0.03144	0.122758	0.068177	0.068092	0.059212	0.157687	0	0.344171	0
Human_newGene_42911	Human_newGene_42911	2.7574	2.26609	2.38493	1.79268	2.4922	3.55979	2.42403	1.78868	2.62091	2.54191	1.957	2.17193	1.48229	2.78479	2.00925	1.78488	2.59097	1.64542	1.5815
ENSG00000153790	C7orf31	2.79335	2.70928	1.18714	1.32084	3.32521	1.33541	1.16117	3.80036	2.16188	2.1698	3.62651	1.02003	1.39102	3.07017	1.80489	1.49457	4.64651	1.27261	1.01002
ENSG00000234409	CCDC188	0.291132	0.413551	0.273575	0.331086	0.248922	0.200677	0.203069	0.310566	0.364906	0.601051	0.462342	0.427266	0.686702	0.519302	0.567875	0.497496	0.555508	0.274713	0.686998
ENSG00000142765	SYTL1	0.161715	0.161206	0.263963	0.280238	0.06174	0.561067	0.106137	0.200524	0.404817	0.145997	0.212315	0.531009	0.30262	0.184447	0.23345	0.108189	0.08847	0.514609	0.349785
ENSG00000113643	RARS	39.2118	32.9601	33.2045	12.028	39.37	35.4616	11.3737	37.0034	24.5355	18.7671	35.7584	24.0083	17.001	36.1556	27.0298	17.543	27.8981	25.2442	13.0144
ENSG00000113645	WWC1	11.3361	14.1323	6.86536	4.1302	11.2492	7.13306	5.17481	12.7512	3.29805	6.54335	10.65	3.10093	3.30118	12.1006	4.0134	6.24482	10.2559	3.56426	2.93183
ENSG00000113649	TCERG1	49.4729	51.0629	33.3061	25.2955	48.6282	32.2702	22.7436	44.7812	24.328	31.5963	43.4498	24.834	18.1232	42.5551	27.1846	29.764	42.2745	25.4057	20.702
ENSG00000113648	H2AFY	100.02	101.197	130.957	130.105	98.4504	109.58	135.586	78.9758	93.8125	90.5098	73.5707	88.9042	77.5948	85.2728	88.7069	95.1781	85.9648	94.3093	87.9988
ENSG00000169432	SCN9A	0.12072	0.159699	0.091496	0.025879	0.146	0.121709	0.008639	0.119156	0.043253	0.027564	0.154665	0.050972	0.015647	0.060472	0.038262	0.065537	0.044912	0.026401	0.023868
ENSG00000169435	RASSF6	0	0	0	0	0.008135	0	0	0	0	0	0	0	0.016999	0	0.007877	0	0.016679	0.007458	0
ENSG00000169436	COL22A1	2.97321	3.17144	3.17735	2.96259	3.265	2.66337	2.22031	3.45426	3.93338	5.70528	3.10691	3.56492	5.98172	3.41183	3.81175	6.58743	3.947	4.63021	3.87008
ENSG00000169439	SDC2	4.11361	3.83831	4.75439	4.81398	4.26233	3.95284	4.47762	6.01015	6.07688	4.29374	5.6279	5.24389	4.46167	6.2939	5.25345	4.07811	4.93809	5.44838	5.28317
ENSG00000189030	VHLL	0	0.137761	0.011993	0.127418	0	0.077207	0	0.06406	0	0.036585	0	0.190617	0.214049	0.075992	0.158083	0.024458	0.081454	0.361944	0.06868
ENSG00000189037	DUSP21	0	0	0	0	0	0	0	0	0	0	0	0	0	0	0	0	0	0	0
ENSG00000111644	ACRBP	0.06857	0.131032	0.187731	0.242089	0.124086	0.097106	0.10648	0.026387	0.206923	0.166644	0.16204	0.013578	0.085975	0.165204	0.375356	0.337176	0.124239	0.018452	0.01563
ENSG00000111647	UHRF1BP1L	7.00106	5.53325	3.71464	5.07908	6.97736	4.66169	3.69774	7.36532	5.18219	5.255	6.57933	5.12317	2.36942	8.6614	3.86011	6.13125	6.55636	6.03334	4.58122
ENSG00000111641	NOP2	58.8184	44.5196	31.9866	30.8293	58.258	39.4057	25.3682	50.5403	27.3376	37.3451	46.7667	30.9154	31.0829	49.0526	33.1344	38.2847	47.1961	31.2127	30.0071
ENSG00000111640	GAPDH	2962.4	3119.42	5508.17	6648.18	3033.84	5495.52	6800.98	3013.15	5455.57	4777.38	3175.37	5523.58	5858.43	2995.01	5058.54	4918.92	3438.89	5692.35	6267.72
ENSG00000111642	CHD4	128.231	118.159	78.711	74.5252	132.945	82.2795	62.965	129.777	86.3574	85.4068	132.116	68.3666	52.9419	128.583	87.2047	94.4721	154.327	76.4616	56.6163
ENSG00000103569	AQP9	0	0	0	0	0	0	0	0	0	0	0	0	0.016792	0	0	0	0	0	0.015302
ENSG00000142494	SLC47A1	0.647128	0.51513	0.436484	0.644531	0.394595	0.504339	0.364067	0.567535	0.56696	0.520166	0.617606	0.660923	0.462459	0.668894	0.564239	0.780096	0.731738	0.680538	0.811701
ENSG00000267228	AC012254.2	0	0	0	0.364213	0	0	0	0	0	0	0.370871	0	0	0	0	0	0	0	0
ENSG00000114030	KPNA1	20.4547	18.1411	8.54198	6.04197	15.6066	8.05522	5.96552	15.2221	7.74713	10.646	18.3472	9.97122	7.22914	18.3433	10.4545	12.4225	16.4753	7.74888	7.85452
ENSG00000073331	ALPK1	0.372564	0.358276	0.097542	0.051018	0.356483	0.09754	0.020979	1.10803	0.274353	0.409635	1.24165	0.232884	0.382695	0.935689	0.271021	0.475611	1.14396	0.287168	0.111477
ENSG00000156313	RPGR	4.40124	4.50681	4.79925	2.5342	4.14212	3.42939	3.59799	5.30504	3.5932	3.10165	4.89708	3.25156	2.7169	6.4333	4.13472	3.53596	5.75103	3.30077	2.73087
ENSG00000039537	C6	0	0	0	0	0	0	0	0	0	0	0	0	0	0	0	0	0	0	0
ENSG00000109220	CHIC2	8.42191	9.30352	4.56793	6.94831	7.89877	4.66013	8.48605	7.21532	4.83816	4.9692	6.05679	1.89509	7.59876	6.46857	5.92612	9.85559	6.76445	2.24224	5.93473
ENSG00000012048	BRCA1	20.868	15.7401	12.5325	9.84696	23.8096	6.71233	4.14952	26.9161	6.19033	7.97006	17.3566	8.87224	2.46126	21.0517	12.3237	9.91846	18.2286	6.24218	2.91181
ENSG00000197323	TRIM33	10.1938	10.2313	2.45988	3.2205	10.2496	2.86366	2.09857	10.6861	3.34601	6.37145	9.93972	2.0542	2.38629	11.341	4.58797	6.53011	9.37473	2.61913	2.57172
Human_newGene_47633	Human_newGene_47633	0.632922	0.351916	0.008805	0.014587	0.246445	0.044193	0.086503	0.229948	0.227921	0.044128	0.213772	0.073858	0.009203	0.428884	0.180423	0.226814	0.377938	0.070927	0.109196
Human_newGene_47630	Human_newGene_47630	0.497885	0.685977	0.016958	0.190618	0.467901	0.086941	0.052964	0.678286	0.073845	0.120878	0.558565	0.074911	0.099786	0.661177	0.279613	0.335494	0.640799	0.079427	0.104688
Human_newGene_47636	Human_newGene_47636	0.214307	0.287466	0	0.527224	1.02456	0.199955	0.345242	0.943355	0.040934	0.153732	0.204263	0.089807	0.080666	0.103351	0.639226	0.249271	1.35026	0.388312	0.051542
Human_newGene_47635	Human_newGene_47635	0.917138	1.06622	0	0.068022	0.02927	0.171773	0	0.968031	0.500356	0.75327	0.88733	0.11994	0.026772	1.23023	0.663469	0.424847	0.260554	0	0.037563
Human_newGene_576	Human_newGene_576	0.332758	0.318856	0.345086	0.505619	0.725464	0.78667	0.469812	0.319479	0.352669	0.300003	0.142431	0.231263	0.434308	0.360403	0.317905	0.47994	0.274932	0.538676	0.229333
ENSG00000149716	LTO1	7.27377	6.20415	7.93556	7.44664	7.12705	7.20208	9.67226	9.92806	7.51027	10.4383	8.92865	10.0285	7.64873	6.25935	8.04628	9.50326	9.32675	8.84863	7.86944
ENSG00000184254	ALDH1A3	0.112756	0.035658	0	0	0.207846	0.001729	0	0.174149	0.10678	0.1204	0.182946	0.051117	0.032459	0.088769	0.083356	0.333556	0.185126	0.022784	0.026381
ENSG00000138942	RNF185	14.3912	13.9898	4.57159	4.135	6.45463	4.2122	2.8715	14.6347	3.87149	7.78921	12.8657	2.8786	6.4505	12.9753	5.38411	8.35327	14.3523	2.81162	4.12658
ENSG00000138944	SHISAL1	1.38872	1.58088	0.652138	0.422927	1.35452	0.637676	0.415619	2.36638	0.782014	1.57682	2.40571	0.857191	0.590773	2.35546	1.00942	1.3926	2.24665	0.92379	0.695781
Human_newGene_46326	Human_newGene_46326	0.20645	0.230619	0	0.120596	0.218059	0.437697	0.498503	0.660013	0	0.111917	0.106285	0.108825	0.249828	0.490768	0.494197	0.880755	0.600181	0.434777	0
Human_newGene_46324	Human_newGene_46324	21.9507	21.3442	20.1448	58.334	46.0168	59.1522	70.0967	28.8252	63.6591	32.9265	22.5956	43.5825	45.5289	22.884	57.6062	39.1548	21.1726	43.7098	36.2271
ENSG00000184258	CDR1	0.404159	0.215175	0.134026	0.388027	0.154187	0.052699	0	0.324321	0.157244	0.049944	0.206868	0.046103	0	0.332923	0.232521	0	0.717192	0	0
ENSG00000163170	BOLA3	43.9772	42.6894	100.484	114.85	45.8045	99.4467	125.988	44.7362	85.4154	77.0046	46.2242	88.5986	95.6343	47.9348	74.7271	75.852	41.6692	91.1883	93.6151
ENSG00000163171	CDC42EP3	8.39879	10.1552	2.33586	2.13728	9.318	2.64036	1.83118	6.20948	2.92844	4.24119	7.79263	1.8661	2.86075	6.32708	4.46166	4.68701	6.64044	1.87105	2.02349
ENSG00000187783	TMEM72	0	0	0	0.018669	0	0	0	0	0	0	0	0	0	0.017072	0.033181	0	0	0	0
ENSG00000008226	DLEC1	0.03677	0.031869	0.02081	0.03497	0.109944	0.048371	0.030819	0.025756	0.044991	0.026833	0.024773	0.026747	0	0.042255	0.029175	0.047582	0.096023	0.027469	0.036384
ENSG00000166529	ZSCAN21	3.11285	3.00111	2.06559	1.41535	3.76221	2.62055	1.88489	4.14118	1.61198	1.74329	2.57164	1.73161	2.87042	2.5775	2.46064	2.89437	3.93119	2.61225	1.71051
ENSG00000166526	ZNF3	4.34583	4.4579	1.58703	1.95761	5.60798	2.21564	1.81044	6.79497	3.20648	4.20511	5.07714	2.26822	5.05575	4.66228	4.08446	4.4243	6.71789	2.40799	3.03553
ENSG00000166527	CLEC4D	0	0	0	0	0	0	0	0	0	0	0	0	0	0	0.038872	0	0	0	0
ENSG00000182362	YBEY	4.04567	1.87648	3.6384	1.607	2.92131	3.43416	3.02208	3.10808	3.29224	2.31503	3.66238	2.88202	2.33785	4.94893	3.06864	2.25695	3.17987	3.68452	1.95218
ENSG00000166523	CLEC4E	0	0	0	0	0	0	0	0	0	0	0	0	0	0	0	0	0	0	0
ENSG00000114698	PLSCR4	0.376857	0.284	0.403762	0.392715	0.540327	0.437975	0.220538	0.80025	0.643812	0.407006	0.666758	0.320811	0.248845	0.871309	0.546016	0.689942	0.746888	0.443485	0.209885
ENSG00000072062	PRKACA	20.3913	18.7427	26.069	27.3121	19.4964	21.939	25.3684	19.0093	23.5404	21.0305	18.2606	22.0615	21.0788	17.8354	22.0711	21.7579	19.4936	21.2996	21.8026
Human_newGene_47989	Human_newGene_47989	0.475864	0.513409	0.241842	0	0.408545	0.277394	0	0.189305	0.200875	0.045588	0.242754	0.111067	0	0.343739	0.200742	0.048634	0.3522	0.254132	0.070197
Human_newGene_47984	Human_newGene_47984	0	0	0.437872	0.348411	0	0.187812	0.058657	0	0	0.139696	0	0	0.402342	0	0	0.384584	0.105993	0.099703	0.755683
Human_newGene_47982	Human_newGene_47982	9.32673	6.85412	13.5952	22.9751	9.72181	15.3831	19.8002	12.6008	19.5482	14.675	11.9462	20.0019	21.1995	10.3877	18.0172	17.814	9.58156	19.7128	22.929
ENSG00000184788	SATL1	0.06087	0.068895	0.044864	0.069598	0.028879	0.038253	0.06888	0.086194	0.143687	0.044262	0.112704	0.084599	0.058097	0.083548	0.123195	0.068898	0.144929	0.103632	0.044161
ENSG00000184786	TCTE3	0.651906	1.00225	1.18036	1.83909	1.14324	0.870004	2.31115	1.19003	1.31789	2.30313	0.830575	0.974484	2.19536	1.29879	1.35578	2.56982	0.872091	1.19522	2.35576
ENSG00000184787	UBE2G2	26.7613	25.0452	17.9312	14.5646	26.9386	15.5836	12.5936	22.5923	13.3694	21.3384	22.6122	14.4409	13.3965	29.9443	16.1617	20.8528	27.5106	13.3894	12.5936
ENSG00000184785	SMIM10	3.19231	5.10095	3.58834	2.06096	3.78905	2.60132	1.66885	3.88004	3.044	2.45384	3.69027	2.74172	1.60371	4.47366	3.53092	2.39551	4.25795	2.77191	2.10163
Human_newGene_32523	Human_newGene_32523	0	0.166467	0	0.137012	0.2238	0	0.504897	0	0	0	0	0	0.124261	0	0.105524	0.193053	0	0	0
Human_newGene_42002	Human_newGene_42002	0	0	0	0	0	0	0	0	0	0	0	0.246879	0	0	0	0	0	0.213688	0
ENSG00000181552	EDDM3B	0	0	0	0	0	0	0	0	0	0	0	0	0	0	0	0	0	0	0
Human_newGene_32527	Human_newGene_32527	1.403	1.03818	0.527113	0.147983	1.52989	0.420886	0.181241	2.33142	1.19296	0.947161	2.57628	0.34579	0.65445	3.35354	1.99898	1.38055	3.77642	0.927849	0.251761
ENSG00000181555	SETD2	10.2999	10.2006	2.20809	2.29996	10.204	2.33624	1.61862	10.9913	2.94637	5.70896	9.17591	1.8896	2.2181	11.1919	4.12277	5.49761	9.65076	2.20549	1.86758
Human_newGene_42004	Human_newGene_42004	0.268419	0.34165	0.626561	0.793229	0.524025	0.481697	0.351042	0.60272	0.414461	0.436535	0.408446	0.581437	0.443596	0.448148	0.387394	0.445496	0.643193	0.71575	0.565379
ENSG00000168476	REEP4	39.7976	35.4976	31.6086	25.6599	38.684	46.5869	37.3935	24.3468	25.6918	23.0142	33.0713	41.4576	29.3701	26.877	24.5047	23.0614	34.7114	38.3914	26.9632
ENSG00000168477	TNXB	0.547324	0.786428	0.208471	0.229361	0.441494	0.283134	0.635547	0.465278	0.394216	0.592914	0.522635	0.453095	0.323521	0.80912	0.532765	0.42126	0.611053	0.446106	0.253229
ENSG00000112697	TMEM30A	55.1393	34.0155	31.8536	36.8031	36.7044	30.7035	31.7962	49.8942	42.6075	69.8351	40.8369	39.1563	56.2833	66.3779	46.6985	71.3333	43.1939	35.6162	65.3006
ENSG00000112695	COX7A2	56.4994	49.3015	120.974	193.69	58.1113	135.544	205.991	73.8543	155.889	175.165	75.0397	188.032	329.843	82.0493	154.178	183.99	62.4799	187.551	241.001
ENSG00000112699	GMDS	4.16993	3.70597	6.05039	4.63875	4.55861	5.0456	5.69069	6.45247	7.53015	3.57181	5.60743	6.38358	4.2613	5.69876	6.03725	3.40105	6.03624	6.70851	4.76964
ENSG00000182093	WRB	5.88006	5.25365	8.39832	7.28134	6.90521	6.99222	7.22638	6.71465	6.00352	5.90874	5.86062	6.74583	4.45596	6.90013	7.39879	4.92768	5.91986	7.45969	4.46074
ENSG00000182095	TNRC18	42.3333	69.3294	12.6347	24.0501	67.6265	12.9662	10.6894	25.2206	15.8741	25.8543	29.2058	9.57852	20.2215	27.7077	19.5129	27.6503	26.8034	11.2618	19.8368
Human_newGene_46584	Human_newGene_46584	0.286076	0	0	0	0	0	0	0.564275	0	0	0.109533	0.23853	0.230943	0	0.275665	0.249987	0	0	0.166096
Human_newGene_46585	Human_newGene_46585	0.116482	0.401408	0.113289	0	0.130915	0	0	0.078686	0	0.284271	0	0	0.147363	0	0.185979	0.486737	0	0	0
ENSG00000186788	SPATA31D3	0	0	0	0	0	0	0	0	0	0	0	0	0	0	0	0	0	0	0
ENSG00000108578	BLMH	31.6387	30.4047	19.1714	9.29729	35.8713	19.896	9.7193	30.3868	14.8476	14.8261	28.2751	13.0554	10.2668	31.1635	17.1098	15.3075	29.5653	17.0931	8.45982
ENSG00000108576	SLC6A4	0.00813	0.042281	0.035299	0.05064	0.029583	0.05643	0.053736	0.007775	0	0.024581	0.015225	0	0.005529	0.015557	0.022791	0.00799	0.014741	0.026862	0.049211
ENSG00000119514	GALNT12	0.333838	0.332541	0.182946	0.387028	0.314183	0.104956	0.288341	1.26936	0.712119	1.04941	1.2003	1.16687	1.0708	1.45892	1.2496	1.39512	1.0773	0.967338	0.778713
Human_newGene_41670	Human_newGene_41670	0.406617	0.091517	0.318029	0	0.462832	0.33269	0.070579	0.165828	0.561845	0.235708	0.335056	0.151883	0	0.582074	0.233892	0	0.185953	0.099181	0
ENSG00000074527	NTN4	1.06613	0.870524	0.59882	0.274414	0.755767	0.597907	0.244038	2.49879	1.15382	1.41288	1.9154	1.19041	0.886223	2.27708	1.6503	1.61391	2.55172	1.1368	0.975792
Human_newGene_36319	Human_newGene_36319	0	0.46641	0	0	0	0	0	0	0	0	0	0	0	0	0	0	0	0.13253	0
ENSG00000050130	JKAMP	23.9144	25.5935	17.9096	10.8861	24.8805	15.3401	11.5634	24.6424	14.0914	15.0057	23.5869	14.8815	14.4919	28.9986	16.6675	16.0081	23.6783	16.2776	11.373
Human_newGene_36314	Human_newGene_36314	0.08457	0	0	0	0	0	0.672103	0	0	0	0	0	0.109169	0	0.099571	0	0	0	0
Human_newGene_28754	Human_newGene_28754	0.6595	0.939098	0.332188	0.291492	0.690548	0.365357	0.447569	0.435996	0.397404	0.446472	0.206014	0	0.106039	0.623747	0.386065	0.42311	0.343119	0.149634	0.097452
ENSG00000169989	TIGD4	0.255455	0.206664	0.139028	0.045449	0.301385	0.055879	0.047852	0.257566	0.091404	0.147267	0.246453	0.078825	0.123521	0.152325	0.192742	0.282661	0.408815	0.081377	0.106306
ENSG00000154269	ENPP3	0	0.029774	0	0	0	0	0	0	0	0	0	0	0.052453	0	0.039087	0.069004	0.01611	0.027066	0
ENSG00000169981	ZNF35	1.71697	6.02054	1.34019	1.66661	3.13402	1.43068	1.07171	1.74246	1.44772	1.59745	5.73728	1.52603	1.16493	2.78633	2.15129	1.80393	3.60815	1.08179	2.65106
ENSG00000154262	ABCA6	0	0	0	0	0	0	0	0	0	0	0	0	0	0	0	0	0	0	0
ENSG00000154263	ABCA10	0.008495	0.03471	0.025135	0.017349	0.019354	0	0.018593	0.050133	0.123948	0.007386	0.052891	0.007416	0.037245	0.019019	0.015104	0.008294	0.026248	0.018635	0
ENSG00000154265	ABCA5	1.6036	1.54534	1.16215	2.48648	1.24083	1.17186	1.30215	2.73164	1.58832	2.26902	2.61107	1.02121	1.47161	2.39922	2.20493	2.53705	1.92127	1.30148	1.74446
ENSG00000187258	NPSR1	0	0.043222	0	0	0	0.020682	0	0.041533	0	0	0.034191	0	0.06891	0	0.016884	0.033562	0	0	0
ENSG00000180209	MYLPF	0.103894	0.084416	0.146267	0.013233	0	0.052643	0	0	0	0	0	0	0.12103	0	0.072251	0.123842	0	0.193258	0.207957
Human_newGene_45801	Human_newGene_45801	0	0	0	0.299241	0	0.347173	0.424486	0	0.089942	0	0	0.105751	0.076624	0	0	0	0	0.232115	0.114987
ENSG00000164961	WASHC5	37.4939	35.2354	30.3664	26.0185	35.1915	30.7601	27.2462	39.4035	26.1454	23.7285	32.0822	23.9374	16.7891	35.2636	26.6692	22.5569	36.8974	27.8704	19.0064
ENSG00000187257	RSBN1L	4.19212	4.16608	0.616904	1.25692	3.82517	0.979332	0.66101	4.3459	1.70284	3.48483	3.27786	0.619104	1.45352	4.26053	2.28216	3.48435	3.32121	0.728319	0.881338
ENSG00000242875	RBMY1B	0	0	0	0	0	0	0	0	0	0	0	0	0	0	0	0	0	0	0
ENSG00000164967	RPP25L	15.8666	16.3481	25.7781	20.3012	13.7867	22.7554	19.3478	11.2075	31.3376	23.9435	13.3748	29.007	30.7666	13.9612	30.6571	25.1189	12.4835	27.5046	27.8528
ENSG00000282988	AL031777.3	0.918186	1.18791	1.00336	0.164736	2.49149	1.43028	0.640934	0.201787	0.301735	0.294897	0.51023	0.40748	0.379643	0.23107	0.135466	0.32128	0.894105	0.051058	0.665935
ENSG00000165383	LRRC18	0	0	0	0	0.030358	0	0	0	0	0	0.021914	0	0	0.063539	0	0	0	0	0
ENSG00000123444	KBTBD4	12.4471	11.5255	5.01929	4.05268	13.4269	6.43229	3.59981	12.9715	6.03896	6.44665	11.557	5.26307	6.85095	12.8967	8.63427	7.25551	11.0166	5.54115	4.72099
ENSG00000165389	SPTSSA	7.88899	7.49828	5.73901	5.07799	8.11153	6.44287	5.61484	9.39999	7.02953	7.67971	10.1366	6.68738	6.42083	10.9499	8.08211	7.2529	9.40001	7.50281	6.10868
Human_newGene_17944	Human_newGene_17944	1.18368	0.894758	0.603938	0.386267	1.33484	0.820728	0.136174	1.22942	0.480117	0.916759	1.75652	0.472867	0.273569	2.29835	0.498373	0.498655	1.45267	0.446	0.106894
ENSG00000090621	PABPC4	116.655	114.991	111.808	88.8255	110.964	97.6268	86.0754	100.499	91.4908	69.521	97.9977	84.7678	80.0982	101.658	78.6763	69.1971	92.8647	79.8382	71.3661
ENSG00000101680	LAMA1	6.59294	6.94949	5.13075	8.40234	6.62298	5.06025	6.27278	8.07636	6.65899	11.6551	7.93196	6.99602	6.97937	8.36396	8.09082	11.4341	7.9403	6.48827	7.63894
ENSG00000183571	PGPEP1L	0	0.03145	0.025531	0	0	0.052732	0	0	0	0	0.031868	0	0	0.03464	0	0	0	0	0.027652
ENSG00000183578	TNFAIP8L3	0.615889	1.24929	0.225019	0.099006	0.761024	0.103758	0.156535	1.7973	0.377366	0.477767	1.37573	0.091024	0.112615	1.67314	0.493791	0.40696	1.18762	0.223217	0.092608
ENSG00000165688	PMPCA	32.0568	30.9788	26.8587	16.9484	32.2352	25.2924	15.6026	29.2786	21.1448	21.869	27.1167	19.7601	17.6748	28.2042	21.7013	18.3144	28.3863	21.0026	14.365
ENSG00000250021	C15orf38-AP3S2	6.46694	4.40576	6.00578	5.35111	9.31758	9.46862	3.25458	5.69141	0.072219	0.08129	10.2921	0.186983	3.0478	9.42793	0.072199	2.82806	7.2736	5.32976	4.02216
ENSG00000116863	ADPRHL2	24.332	24.0636	12.058	9.56561	23.2283	12.3984	7.8671	23.7751	13.1547	17.5742	23.1564	10.7052	18.9214	21.7678	14.555	17.9636	22.7563	10.4927	12.984
ENSG00000255767	AC108488.2	0.776362	0.655152	0.378342	0	0.482453	0.695533	0	0.553025	0.563473	0.626693	0.671691	0.393184	0.452667	0.827049	0.986045	0.215321	0.653925	0.60406	0.625229
ENSG00000006756	ARSD	0.422199	0.315099	0.332059	0.087478	0.340226	0.174276	0.085678	0.682959	0.536426	0.300077	0.732565	0.288584	0.19234	0.687365	0.639626	0.304329	0.441726	0.304057	0.146809
ENSG00000006757	PNPLA4	5.30038	3.8382	3.35278	4.55993	4.00739	4.75076	2.43369	2.95104	3.69334	2.44785	4.91411	4.89634	3.24485	5.1208	3.74795	1.57292	3.22604	2.41355	2.19499
ENSG00000154889	MPPE1	2.10526	2.7012	1.81164	0.607478	1.83089	2.64022	1.33848	2.27303	1.93689	1.88918	2.69663	2.20698	1.52318	2.34231	2.58529	1.67257	2.82294	3.67235	0.969853
Human_newGene_9910	Human_newGene_9910	0.08229	0.113431	0.064401	0.27369	0.305083	0.203915	0.157128	0.158812	0.298224	0.183966	0.694172	0.650078	0.093082	0.093268	1.11885	0.335137	0.379438	0.566538	0
ENSG00000159459	UBR1	5.54145	4.68533	3.80459	3.84666	5.12799	2.97908	2.52913	5.34884	2.6458	3.52961	4.8134	2.53973	2.11822	5.69258	3.48608	3.83067	4.62919	2.63138	2.37711
ENSG00000165684	SNAPC4	5.84966	6.1992	4.03649	4.46368	6.04508	4.17793	3.46757	4.40728	3.56037	5.3343	4.42361	3.06174	4.41607	3.86994	3.327	4.95382	3.86281	2.53528	3.47393
ENSG00000159450	TCHH	0.165968	0.321297	0.075562	0.111573	0.167977	0.085681	0.105579	0.091687	0.097308	0.091808	0.070816	0.066204	0.101409	0.036304	0.150166	0.150999	0.135077	0.078776	0.098939
ENSG00000100483	VCPKMT	5.20849	5.45426	2.87659	3.37926	4.88773	3.35946	2.24028	4.69131	4.13155	3.77888	5.79896	3.75227	4.38136	7.09928	3.93709	4.24264	5.30173	3.85481	3.66652
ENSG00000165685	TMEM52B	0.357199	0.170298	0.123879	0.029688	0.108207	0.019111	0	0.131616	0.061948	0.035758	0.1831	0.037696	0.018655	0.112862	0.172993	0.055647	0.131054	0.102359	0
ENSG00000100485	SOS2	5.54833	5.63822	1.31037	1.78371	5.54765	2.1331	1.65124	5.92801	2.449	4.51656	4.9985	1.61377	2.26666	6.0362	2.9386	4.64864	5.69759	1.57966	1.56828
ENSG00000159455	LCE2B	0	0	0	0	0	0	0	0	0	0	0	0	0	0	0	0	0	0	0
Human_newGene_5053	Human_newGene_5053	12.6845	14.9289	17.1113	8.05811	16.1572	17.7715	11.1107	15.2217	11.964	8.98941	16.3697	17.4705	9.93203	16.6132	11.8059	8.22274	18.0985	19.7365	8.19135
ENSG00000129562	DAD1	90.4916	78.9004	136.692	135.405	73.5308	123.741	129.112	79.8991	110.644	103.213	79.2374	119.486	123.227	71.3878	111.426	100.537	76.9379	106.732	116.1
ENSG00000107651	SEC23IP	18.216	20.1979	10.2281	8.92039	20.0519	10.3309	8.12256	20.3379	8.51302	11.4766	18.6916	7.9207	6.93302	17.9849	9.0072	9.96237	17.4439	7.68606	6.97332
ENSG00000006282	SPATA20	21.0618	22.8494	38.1097	39.3327	24.1204	35.9954	49.6683	24.6227	38.5789	33.9572	26.6247	31.8801	39.6131	23.8263	40.5619	37.1489	30.9773	40.7559	42.0726
ENSG00000006283	CACNA1G	3.59618	3.78357	3.06486	2.21192	3.63719	3.16643	2.4122	6.92715	4.66019	3.53452	6.9199	4.67244	2.52524	6.4512	4.62641	4.14306	7.27698	5.09445	3.4751
ENSG00000217442	SYCE3	0.503018	0	0.371572	0.443445	0.112338	0.412792	0.323328	0	0.724116	0.921612	0	0.469421	1.27013	0.686835	0.257103	1.18059	0.161003	1.11322	1.13183
Human_newGene_22372	Human_newGene_22372	0	0	0	0.883803	0.060377	0	0	0.031035	0	0	0.044027	0.036036	0	0	0	0	0	0	0.070142
ENSG00000253649	PRSS51	0.853457	0.741836	0.051806	0.227989	0.55784	0.133367	0.1308	1.24222	0.537662	1.04466	0.83506	0.257022	0.344175	1.12213	0.703545	0.937856	1.09745	0.24842	0.284901
ENSG00000174004	NRROS	0	0	0	0	0	0	0	0.119498	0	0.065462	0.078429	0.040151	0.029805	0.040071	0.058702	0.061604	0.075164	0.03487	0.054202
ENSG00000198718	TOGARAM1	3.26546	2.92015	1.2091	1.31328	3.02215	1.70885	1.00143	3.31777	1.96998	2.66607	2.75326	1.29492	1.53881	3.39904	2.20099	2.13555	2.83157	1.09154	1.49335
ENSG00000164037	SLC9B1	0.085716	0.069315	0.116216	0.02683	0.074324	0.025197	0.01407	0.080373	0.081693	0.040062	0.204016	0.106417	0.11967	0.071608	0	0.087818	0.047677	0.024901	0.114449
ENSG00000164035	EMCN	0	0	0	0.013544	0	0	0	0	0.013364	0	0	0	0	0	0.012428	0	0.012457	0	0
ENSG00000164032	H2AFZ	583.143	542.764	829.928	592.685	626.39	934.853	697.46	646.943	921.584	624.59	674.361	1049.2	795.86	658.78	899.046	609.71	616.512	1066.12	777.135
ENSG00000164031	DNAJB14	7.23784	6.98374	3.78095	3.65929	7.70608	3.93126	2.70358	8.28171	3.48744	6.29711	7.16158	3.3617	4.885	6.10791	4.82404	7.15447	6.98583	4.52764	3.81151
ENSG00000242120	MDFIC2	0	0	0	0	0	0	0	0	0	0	0	0	0	0	0.019501	0	0	0	0
ENSG00000198712	MT-CO2	7554.25	8173.67	4881.3	3923.14	7605.58	5263.19	3329.39	9039.08	9961.22	7096.01	9134.38	8088.16	6472.21	8548.67	10517.4	6917.55	9585.53	7740.98	5318.04
ENSG00000198715	GLMP	0.107453	0.262468	0.251722	0.464708	0.147052	0.412184	0.152736	0.159935	0.410791	0.42102	0.044105	0.249811	0.144545	0.153172	0.302916	0.255013	0.218693	0.058793	0.15277
ENSG00000164038	SLC9B2	5.22119	5.91411	5.72335	5.65426	5.81064	4.71057	4.90299	6.20058	3.24669	3.5847	4.03972	3.59046	3.97306	5.08417	3.50323	3.22958	4.57879	3.96343	3.28795
ENSG00000164039	BDH2	2.75694	3.91056	4.97249	6.19677	3.76376	3.93299	7.09222	5.96474	6.72303	6.79833	6.72776	6.19957	5.92884	5.87442	7.70525	6.0035	6.62965	7.34844	7.06265
ENSG00000100151	PICK1	6.64256	7.74	5.98372	4.12267	8.09352	6.25955	3.99866	6.57723	5.29717	4.39553	6.35684	5.4184	5.2737	5.0308	4.73527	5.8416	7.74573	4.97612	3.87208
ENSG00000100150	DEPDC5	5.01589	4.55383	3.86385	2.81932	4.49153	3.35887	2.52379	4.97724	2.39633	3.65828	4.99097	3.84454	2.14167	5.06654	2.53758	3.64001	5.59857	2.19924	3.04855
ENSG00000100156	SLC16A8	0.336285	0.906721	0.093267	0.561703	0.611611	0.280425	0.450396	0.360741	0.206218	0.527892	0.181252	0.368223	0.36355	0.367288	0.523488	0.749049	0.463723	0.370257	0.288249
ENSG00000171634	BPTF	26.204	28.5831	9.05022	7.68268	25.3774	9.41184	5.86825	26.1075	9.68666	12.287	26.1787	7.5845	6.7068	28.7377	16.1434	12.1383	24.23	7.55436	5.09904
ENSG00000100154	TTC28	1.40745	2.14307	0.485558	0.520599	1.91124	0.482837	0.213418	2.49602	1.14593	0.780068	2.82889	0.453175	0.300599	2.11325	0.779785	1.69916	2.11615	0.991556	0.308214
ENSG00000120068	HOXB8	0.361544	0.416059	0.05762	0.428025	0.491182	0.256522	0.068089	0.588456	0.367026	0.392669	0.336171	0.576964	0.424149	0.319244	0.320383	0.558906	0.490515	0.33274	0.307602
Human_newGene_699	Human_newGene_699	3.36897	3.42276	1.6882	1.70038	2.58161	1.84821	1.68825	2.94479	1.05146	2.39195	2.82657	0.938902	1.36833	2.49153	2.02769	2.42034	2.7339	1.17859	1.00638
ENSG00000284917	EEF1AKMT4-ECE2	0.044815	0	0.053206	0	0	0	0	0.022358	0	0.061264	0.039964	0.156888	0.162577	0.033158	0.202884	0.139463	0.130347	0	0.014868
Human_newGene_690	Human_newGene_690	0	0.028521	0.072979	0.370736	0.033991	0.186579	0.563014	0.023515	0.223395	0.502711	0	0.346958	1.1992	0.070669	0.311391	0.406168	0	0.168624	0.84364
ENSG00000125743	SNRPD2	108.555	90.0166	147.938	305.357	71.3064	73.631	124.67	42.7159	137.028	92.8526	97.0161	122.066	136.41	45.5105	127.697	101.472	78.6366	99.7127	147.898
ENSG00000125741	OPA3	7.83023	7.08365	1.84952	1.6911	6.82745	2.08566	1.37375	5.00667	1.91207	3.24783	4.75151	1.43393	2.2824	5.10651	1.99278	2.72229	4.66377	1.2447	1.67539
ENSG00000125740	FOSB	4.13649	2.26058	4.86696	11.5585	3.73459	8.7233	19.5607	2.09251	2.78226	14.4749	3.11009	9.05465	24.8735	2.13261	3.08008	11.7339	3.75786	8.43783	28.6497
ENSG00000125746	EML2	3.25669	2.96597	2.29775	4.32175	3.27211	2.2805	3.58406	4.20411	3.36999	5.81872	3.7196	3.58945	6.06428	3.89854	3.47145	3.86355	4.29009	4.49685	4.98292
ENSG00000125744	RTN2	3.33665	4.81313	4.85351	3.69343	4.41643	4.45181	4.6619	6.45861	4.73094	5.54127	7.17747	6.33989	5.88108	7.48869	5.94113	4.57208	6.84362	6.51659	4.07292
ENSG00000203546	AL139353.1	0.373394	0	0.554366	0.562241	0.105205	0.835559	0	0.40437	0.210645	0.618415	0.38684	0.008287	0.62453	0.363464	0.234408	0.46097	0.240286	0.024287	0.753585
ENSG00000167608	TMC4	0.105794	0.213596	0.779556	0.753089	0.980875	0.502995	0.40927	0.142667	0.352438	0.354964	0.144367	0.471784	0.897442	0.285516	0.19531	0.737665	0.535936	0.371879	0.713164
ENSG00000285064	SMIM40	0	0	0	0	0	0	0	0	0	0	0	0	0	0	0	0	0	0	0.035208
ENSG00000124299	PEPD	19.6305	21.4462	33.9277	36.548	16.5627	30.2923	40.0041	19.8714	29.0011	30.8392	21.0294	30.5667	35.0137	22.3208	29.1259	36.6176	24.7496	32.0735	36.1688
ENSG00000167600	CYP2S1	1.69105	1.71418	0.887636	0.793328	1.1375	0.941427	1.24881	1.38617	1.25587	1.54302	1.88267	0.86259	1.04788	1.5884	1.35899	1.34962	2.06127	1.42739	0.838208
ENSG00000167601	AXL	59.0675	59.7478	42.5557	53.9172	74.3669	36.4348	47.4073	45.8514	38.9799	35.723	46.6377	31.7987	32.2735	55.6883	36.2718	34.171	44.4908	33.4236	32.9711
ENSG00000167604	NFKBID	2.49962	2.60021	0.987191	0.883617	2.77624	0.98148	0.629076	1.97271	1.37813	1.98251	2.20176	0.957694	1.31044	1.83228	1.16592	1.38191	2.47071	0.771487	1.14997
ENSG00000243989	ACY1	10.1071	14.429	30.429	32.2562	10.8216	27.6062	31.8304	16.9095	29.5181	26.8181	20.8881	31.1009	30.9574	18.1338	26.3331	26.0364	21.5026	29.6294	35.2962
Human_newGene_15454	Human_newGene_15454	4.51404	3.65757	1.57084	1.7356	4.26544	1.97779	1.49896	4.56544	1.79768	3.54655	3.90128	0.976455	3.1907	3.81742	2.59191	2.88268	4.53613	1.14769	2.02516
ENSG00000042832	TG	0	0	0.006257	0.03863	0	0	0.025752	0	0	0	0.012495	0	0.017573	0.005492	0.020781	0.006245	0.019397	0.00511	0
ENSG00000096717	SIRT1	10.1515	10.8399	3.86414	3.50123	10.6959	4.59466	2.8052	13.0802	4.08528	6.32318	15.8222	3.82394	5.71737	13.5236	4.8976	6.37429	14.3966	3.84077	4.6433
Human_newGene_343	Human_newGene_343	1.13837	1.69973	1.51708	0.320885	1.35255	2.63554	0.602988	0.489178	1.42774	0.707845	0.643064	1.48436	0.436884	0.895341	1.3789	1.37516	0.683548	2.12674	1.14107
Human_newGene_19980	Human_newGene_19980	1.92795	1.98796	0.513679	0.699199	2.215	0.59428	0.388814	0.492747	0.419929	0.087305	0.423966	0.353579	0.216597	0.679739	0.636326	0.166871	0.530562	0.496735	0.192701
ENSG00000046647	GEMIN8	3.4426	3.64314	2.92878	1.0872	4.12708	3.32086	2.04287	5.14471	2.38929	2.59183	5.127	2.41626	1.70094	4.80154	3.19382	2.45747	5.1722	2.42073	1.36161
Human_newGene_1758	Human_newGene_1758	16.7642	14.2746	3.61936	6.33509	9.45351	3.14639	3.04881	9.57151	4.95868	4.17962	11.2357	4.31724	6.92945	8.23325	5.23609	5.1984	7.19433	4.68951	3.69388
ENSG00000240184	PCDHGC3	9.59511	8.9845	7.25832	7.25514	8.82474	7.32087	5.89012	10.23	9.63265	11.9636	11.4823	8.40017	10.6382	8.31047	8.93216	11.0265	10.8698	6.07763	7.87341
Human_newGene_1755	Human_newGene_1755	0	0.548718	0	0	0	0	0	0	0	0	0	0	0	0	0	0	0.059095	0	0
Human_newGene_1752	Human_newGene_1752	0.378013	0.292271	0.390049	0.159391	0.570444	0.125434	0.057894	0.035107	0.160995	0.293078	0.263054	0.502928	0.106112	0.177277	0.080151	0.246511	0.462843	0.155483	0.054292
ENSG00000166959	MS4A8	0	0.042626	0.049137	0	0	0	0	0.029472	0	0.036558	0	0	0	0	0.061568	0	0	0	0
Human_newGene_12102	Human_newGene_12102	0.610646	0.653912	0.288694	0.093302	0.70319	0.523867	0.356949	0.579116	0.375411	0.444823	0.139686	0.689652	0.369674	0.981059	0.503702	0.32824	0.54691	0.033267	0.144147
Human_newGene_12100	Human_newGene_12100	0.773936	0.7628	0.367469	0.00865	0.452895	0.329532	0.068884	1.17501	0.209511	0.176761	0.670809	0.099937	0.221395	1.40472	0.305154	0.214349	0.677182	0.19826	0.124951
Human_newGene_19903	Human_newGene_19903	0.484825	0.557215	0.297281	0.302546	0.473371	0.706334	0.425041	0.364052	0.971612	0.548001	0.462329	0.515019	0.345388	0.443434	1.11236	0.590606	0.592881	0.720308	0.480554
Human_newGene_27388	Human_newGene_27388	0.006335	0.028767	0.178679	0.263283	0.016896	0.367011	0.424792	0.074329	0.087303	0.402398	0.043188	0.313336	0.406478	0.037599	0.216794	0.135245	0.04497	0.295538	0.581166
Human_newGene_19904	Human_newGene_19904	0	0	0.283549	0	0	0.288352	0.046447	0	0.541087	0.531952	0	0.28325	0.152861	0	0.615727	0.229109	0	0.419862	0.220252
Human_newGene_19905	Human_newGene_19905	0	0.010002	0.463162	0.436893	0	0.514202	0.372637	0	1.06528	0.837467	0	0.386973	0.453871	0.036171	0.764659	0.682679	0.020762	0.31342	0.614583
Human_newGene_27387	Human_newGene_27387	0.91396	0.671878	1.32528	1.19133	1.08282	2.05248	0.662135	0.925874	1.54556	1.28152	0.70287	2.48131	1.63834	0.663439	1.52111	1.15745	0.567944	2.05978	1.35598
Human_newGene_27381	Human_newGene_27381	1.72435	1.21688	0.825968	0.93589	1.75707	0.360827	0.425691	1.55185	0.809883	1.28054	1.16505	0.509629	0.842521	2.54461	0.773179	1.17136	1.605	0.635963	0.533911
Human_newGene_27380	Human_newGene_27380	0.13932	0.54344	0.048399	0.27287	0.305932	0.210142	0	0.47602	0.042552	0.239094	0.284025	0.261658	0.113289	0.230801	0.321368	0.208246	0.23427	0.186745	0.155635
Human_newGene_27383	Human_newGene_27383	0.399224	0.215811	0.069387	0.040436	0.110926	0.084572	0.18107	1.95411	0.700276	0.353448	1.24246	0.335096	0.160298	1.29405	0.367872	0.233134	2.04399	0.290568	0.068192
Human_newGene_27382	Human_newGene_27382	5.07227	5.67499	3.9155	2.34224	6.50027	3.24707	1.92697	12.4656	6.2309	5.79141	19.4196	10.8672	7.56829	10.0196	6.32043	6.01509	10.3987	8.89504	8.67593
Human_newGene_2318	Human_newGene_2318	0.275876	0.337521	0.158154	0.043779	0.247965	0.27016	0.08654	0.489448	0.480641	0.486715	0.515787	0.170668	0.112368	0.350253	0.420457	0.888237	0.553182	0.205747	0.076306
ENSG00000127241	MASP1	0	0	0.010021	0	0.049068	0	0	0.117868	0.010689	0.024639	0.062606	0.029231	0.012689	0.083038	0.012496	0	0.104675	0.011134	0.034577
ENSG00000127249	ATP13A4	0	0	0	0	0.011704	0	0	0	0.018453	0	0	0	0	0	0	0.01254	0	0	0
Human_newGene_19494	Human_newGene_19494	2.77085	3.8428	2.15938	1.47703	3.42653	2.36486	2.40553	2.78213	3.16866	2.78616	3.55748	3.48764	2.56781	4.83306	2.62599	2.17004	4.83614	3.51674	2.60569
Human_newGene_5832	Human_newGene_5832	0.058606	0	0	0	0.553842	0.039126	0	0	0	0.236391	0.0922	0	0	0	0	0.133972	0	0	0.136734
Human_newGene_5831	Human_newGene_5831	0.649548	0.487028	1.10498	0.781963	0.423162	0.710082	0.879386	0.422932	0.896255	1.16577	0.668739	0.688775	1.33049	0.723735	1.00597	1.38819	0.42492	1.03243	1.70414
Human_newGene_36492	Human_newGene_36492	0	0	0	0.204815	0.326896	0	0.65426	0	0	0	0	0	0	0	0	0.378829	0	0	0
ENSG00000283463	HSFX4	0	0.084746	0	0	0.128118	0.080621	0	0	0.034359	0	0	0.028479	0	0.071183	0	0.018442	0.041212	0	0.039212
Human_newGene_17578	Human_newGene_17578	0.221291	0.037641	0.085279	0.256494	0.187477	0.08418	0	0.289321	0.244978	0.914181	0.202713	0.373603	0.081077	0.285822	0.506026	0.33987	0.347252	0.500625	0.045679
ENSG00000136425	CIB2	10.3327	8.62935	12.8476	12.916	7.71643	13.6244	13.0917	14.3734	20.4515	15.321	15.3259	15.9378	15.1254	11.9818	21.4497	15.2017	14.2352	16.7395	14.7789
Human_newGene_17687	Human_newGene_17687	0.155658	0	0.321235	1.1983	0.301341	0.780302	1.7953	0.059545	0.488978	2.03655	0.130429	0.923772	2.39068	0.15406	0.435853	1.78124	0.107353	1.00632	2.61614
ENSG00000010322	NISCH	22.3286	21.2641	15.0494	13.2726	21.6455	14.1817	10.7151	21.1121	15.5578	16.7699	19.1433	10.9737	11.4232	20.7599	15.9139	16.1948	20.4836	12.0365	10.4108
Human_newGene_17684	Human_newGene_17684	0.967401	1.06197	0.874048	1.21469	1.46249	0.86458	0.528818	1.13409	1.25213	1.37904	0.827175	1.0886	1.2315	1.0099	1.23183	1.231	0.989724	1.53873	1.45397
Human_newGene_6562	Human_newGene_6562	0.279256	0.360095	0	0.023399	0.319302	0.169179	0.095667	0.274083	0	0.149913	0.299479	0	0.277993	0.385767	0.151185	0.907782	0.694217	0	0.13892
Human_newGene_26474	Human_newGene_26474	0.058241	0	0.331028	0.744559	0.053074	0.014623	0.076565	0.033569	0.239081	0.136487	0.03313	0.027734	0	0.055357	0.045233	0.046226	0	0.074666	0.078217
Human_newGene_26475	Human_newGene_26475	0.38607	0.345922	0.050966	0.291674	0.262403	0.095947	0.156238	0.343506	0.111377	0.19051	0.373134	0.084276	0.070156	0.404487	0.189022	0.18391	0.407115	0.073766	0.063932
Human_newGene_26477	Human_newGene_26477	0	0	0.108813	0.143851	0.020522	0.135916	0	0.162897	0.065107	0.045513	0	0.016532	0.00973	0	0	0.096311	0	0.575861	0
ENSG00000060642	PIGV	2.92757	3.09861	3.60254	2.42439	4.52918	2.10323	2.58956	3.25027	3.88989	2.90111	2.88902	2.59273	2.58003	2.88194	3.06902	4.02801	3.2317	2.62095	2.21045
Human_newGene_26472	Human_newGene_26472	5.28243	5.24408	1.69313	2.64272	5.05516	2.31326	0.569641	5.87899	1.60449	2.17512	5.57143	2.3954	1.18018	4.15439	2.30267	2.65479	4.64627	1.65295	2.31037
Human_newGene_26473	Human_newGene_26473	0.470786	0.573179	0.079628	0.056401	0.284905	0.312312	0.088876	0.416915	0.153723	0.361456	0.654067	0.261108	0.168545	0.549825	0.356721	0.319203	0.530083	0.290701	0.175296
ENSG00000128652	HOXD3	0	0.055355	0.131859	0.042434	0.032661	0.167526	0.13597	0.084382	0.291088	0.160059	0.141823	0.272289	0.182527	0.085073	0.158519	0.061036	0.209087	0.193534	0.107002
ENSG00000128656	CHN1	0.398762	0.435623	0.374397	0.578858	1.01755	0.457291	0.244202	0.420822	0.256896	0.143156	0.572837	0.302001	0.104101	0.317172	0.183024	0.149872	0.40916	0.163331	0.150774
ENSG00000128654	MTX2	20.1484	21.8754	18.4154	10.4647	24.7831	20.5021	18.3435	22.1848	12.7259	14.1896	18.6668	18.8662	12.8706	26.3372	11.1652	12.9658	18.2423	19.0744	14.0059
ENSG00000128655	PDE11A	0.154726	0.127612	0.083256	0.152722	0.10801	0.045017	0.025422	0.19417	0.051398	0.037153	0.201989	0.040906	0.059919	0.174499	0.063996	0.056684	0.16831	0.085883	0.042481
ENSG00000276289	KCNE1B	0	0	0.033416	0	0	0	0	0	0	0	0	0	0	0	0	0	0	0	0
ENSG00000173542	MOB1B	9.31152	7.21591	2.08727	2.71303	7.31481	2.5878	2.24814	9.99216	3.47319	6.30977	9.48332	2.46828	3.59821	9.55439	4.26556	6.47178	8.5176	2.91745	3.55708
ENSG00000157211	CDCP2	0.019849	0	0.047313	0.04126	0.055268	0	0	0.00931	0.04142	0	0	0	0.037308	0.018866	0.018425	0	0	0	0
ENSG00000157212	PAXIP1	1.59042	1.48638	0.873883	0.892649	1.38277	0.597953	0.51142	2.02798	0.877128	0.981099	1.69017	0.799201	0.526401	1.51051	0.880394	0.893374	1.71152	0.746622	0.499954
ENSG00000157214	STEAP2	0.999482	1.21535	0.603216	0.31227	1.02474	0.388834	0.270145	1.36122	0.960492	0.971278	1.24693	0.359939	0.275624	1.38479	0.830614	1.01282	0.933827	0.653478	0.317745
ENSG00000204099	NEU4	0.043044	0	0	0	0	0	0	0	0	0.018389	0.066352	0	0.060507	0.088659	0.022073	0	0.096899	0.035394	0.02757
ENSG00000122033	MTIF3	7.38542	6.94219	4.45912	2.27771	7.33282	3.45469	2.97263	8.17735	3.36177	3.48006	7.37899	4.62472	4.40902	9.06601	3.88637	3.30611	8.01098	4.89006	2.50182
ENSG00000157219	HTR5A	0	0	0	0	0	0.011466	0	0	0	0.064579	0	0	0	0	0	0.009711	0	0	0
ENSG00000173548	SNX33	2.91003	3.16764	0.963635	1.73327	3.05959	1.23123	0.835558	3.30754	2.04086	3.33232	4.303	0.974191	1.9941	3.41768	2.75299	3.62045	4.37911	1.2946	1.34231
ENSG00000137486	ARRB1	5.28812	5.37753	4.79794	2.68174	6.07184	5.06281	2.05263	4.7387	2.23515	4.42864	5.16672	2.55133	1.3453	5.34117	3.28358	3.81025	5.5991	2.6761	1.79372
ENSG00000174013	FBXO45	7.78125	7.02395	2.36452	2.07455	8.1884	2.32193	1.76633	9.63336	3.17173	4.90979	8.6013	2.52906	3.76995	9.5059	3.93419	5.23645	7.98047	2.46161	2.66745
ENSG00000174015	SPERT	0	0	0	0	0	0.028334	0	0	0	0	0	0	0	0	0	0	0	0	0
ENSG00000158445	KCNB1	0.966815	0.943407	0.077492	0.088979	0.89296	0.081223	0.160196	1.873	0.200037	0.418266	2.4707	0.166353	0.278167	2.08022	0.714707	0.367836	2.45086	0.13338	0.18207
ENSG00000174016	TENT5D	0.098649	0.172551	0.146922	0	0.20609	0.151232	0.076169	0.20986	0.036313	0.0637	0.307026	0.024859	0	0.266253	0.113071	0.118923	0.202391	0.014392	0
ENSG00000235118	FAM237A	0	0	0	0	0	0	0.062654	0	0	0	0	0	0	0	0	0	0	0	0
ENSG00000044090	CUL7	10.7895	12.8705	12.8729	12.2851	12.5019	12.5363	11.9851	13.1231	14.7752	13.3716	13.1184	13.2496	13.3031	13.7568	16.1812	14.0953	14.4513	13.6403	11.4617
Human_newGene_10505	Human_newGene_10505	0	0.417681	0.077359	0	0	0	0	0.19085	0	0	0	0	0	0.230034	0	0	0	0.064942	0
ENSG00000279395	OR5L1	0	0	0	0	0	0	0	0	0	0	0	0	0	0	0	0	0	0	0
Human_newGene_14887	Human_newGene_14887	0.302837	0.34663	0	0.120786	0.193512	0	0	0.187276	0.232528	0.09006	0.290594	0.059915	0.139822	0.184211	0.143532	0.174295	0.240584	0.036914	0.057507
Human_newGene_10503	Human_newGene_10503	0.122731	0	0	0	0	0	0	0.205285	0	0.12722	0.058962	0.476613	0	0	0	0	0	0.251109	0
Human_newGene_10502	Human_newGene_10502	2.33585	2.05855	0.706995	0.436632	1.56037	0.940297	0.446807	2.45717	0.699241	0.237984	2.68074	1.03525	0.243346	2.82963	1.19775	0.312527	4.03458	1.11337	0.410148
ENSG00000204323	SMIM5	0.036864	0.165392	0.1026	0.235478	0.179836	0	0.183173	0.17977	0.142532	0.312371	0.127728	0.066841	0.118134	0.13897	0.203217	0.132769	0.118652	0.163259	0.163595
ENSG00000254004	ZNF260	0.97539	0.729398	0.886709	1.28782	3.50943	1.56975	0.683345	4.72104	0.731309	0.771966	4.08658	1.22816	1.086	4.85402	2.35702	0.886837	3.91731	1.3233	1.15217
Human_newGene_20730	Human_newGene_20730	1.91024	2.43518	2.23804	1.03692	2.24666	2.7674	1.29477	1.41805	2.54379	1.60416	2.34641	2.51555	2.65602	2.21765	2.96907	3.61329	1.48206	2.62115	1.65452
Human_newGene_20732	Human_newGene_20732	0	0	0	0.660429	0	0.11761	0	0	0	0	0	0.082352	0	0	0.108663	0	0	0	0
Human_newGene_3862	Human_newGene_3862	0.939058	1.15303	1.49389	1.18878	0.591288	1.93852	1.9817	0.834598	0.845747	0.880446	0.705717	1.37977	1.38157	0.784131	0.660014	0.749958	0.620406	0.574568	0.894891
Human_newGene_20739	Human_newGene_20739	0.051895	0.113875	0.478906	0.179528	0.316028	0.217017	0.607203	0.132343	0.546494	0	0.339903	0.50634	0	0.212585	0.19396	0.203093	0	0.559939	0
ENSG00000130287	NCAN	0.234527	0.283371	0.219152	0.164471	0.17309	0.152799	0.128633	0.415253	0.37761	0.415525	0.351946	0.447165	0.402734	0.453389	0.58597	0.558261	0.489018	0.424796	0.436264
ENSG00000272949	AC093668.2	0.806916	0	0	0	3.34165	0	2.83699	0	0.032713	0.771208	2.2294	0.617899	0	0.032383	0.058534	0	0.010739	0	0
ENSG00000130283	GDF1	0.068829	0.144615	0.060597	0.287114	0.087473	0.043461	0.132149	0.137858	0.050213	0.037812	0.002327	0	0.002813	0.065601	0.091863	0.129682	0.161589	0.311885	0.220307
ENSG00000135535	CD164	46.115	34.3057	27.9435	53.3812	43.532	46.6202	55.0528	47.7692	56.2604	45.7663	54.4964	57.383	45.1089	56.5847	61.2831	51.4729	52.3161	52.4457	48.0096
ENSG00000154743	TSEN2	6.65884	5.98123	4.42614	3.98523	7.55723	4.58205	2.71503	7.08321	3.79558	3.61309	7.24362	1.79581	2.69208	6.72954	2.94389	3.30923	5.09996	2.95379	1.72949
Human_newGene_1035	Human_newGene_1035	0.276541	0.340959	0	0.231172	0.445292	0.079001	0.243395	0.127242	0	0.185889	0.707542	0.082431	0.417221	0.274391	0.067843	0.360372	0.084793	0.133671	0.189786
ENSG00000159714	ZDHHC1	4.46293	4.91014	6.30183	5.61974	3.4549	4.90905	5.34358	3.97352	5.70314	4.47687	4.22903	5.00028	5.28697	4.33583	4.63903	3.95889	4.46085	5.01757	4.94423
ENSG00000159713	TPPP3	3.6293	2.74642	3.87895	7.24265	4.58881	5.72034	5.55859	4.72586	8.95572	7.72681	8.14818	6.20054	9.41939	7.18301	5.39738	5.57868	4.75719	10.2018	7.34216
Human_newGene_50308	Human_newGene_50308	2.53578	2.09997	0.535202	0.724924	1.09279	0.626835	0.094045	2.29397	1.28408	1.15832	0.283619	0.792657	0.347297	1.71771	1.2364	0.839617	2.22747	0.489225	0.893229
Human_newGene_50307	Human_newGene_50307	0.374719	0.314797	0.105997	0.12011	0.276524	0	0	0.29458	0.132781	0.685734	0.286605	0	0.13114	0.480467	0.28523	0.10987	0.377317	0.219504	0.037743
Human_newGene_50306	Human_newGene_50306	0.377555	1.14937	0.151032	0.241373	0	0.471544	0.398977	0.424468	0.138466	1.11355	0	0	0	0.21383	0.854926	0.763968	0	0.047392	0
Human_newGene_50300	Human_newGene_50300	9.17963	4.53435	4.6382	7.06712	8.56115	3.59191	3.22866	6.04606	3.18962	3.40152	4.06486	2.96395	1.20611	7.98828	3.18121	3.59765	6.41871	2.56288	1.10655
ENSG00000121075	TBX4	0.650032	0.223043	0.16757	0.28315	0.879473	0.192148	0.034812	0.766061	0.173756	0.487985	0.804124	0.195022	0.133267	0.601634	0.470229	0.585753	0.428837	0.285665	0.088811
ENSG00000121073	SLC35B1	24.233	23.9724	31.2086	37.2502	26.8052	36.5473	34.3303	20.8244	30.9211	21.1758	22.9951	26.3207	26.2047	25.5575	25.9076	26.2129	22.1422	28.7257	27.9391
ENSG00000168237	GLYCTK	6.18082	6.87815	6.49519	3.99729	6.84501	6.27549	4.21054	3.79454	4.42905	4.2115	4.72354	4.14681	3.60669	5.00209	4.2677	4.35744	4.30913	3.83595	3.11385
ENSG00000171570	RAB4B-EGLN2	0	0	0	0	1.98355	0	0	0	0.012502	1.74309	0	0.009982	1.40856	1.88213	2.55819	0	0	0	0
ENSG00000120306	CYSTM1	10.3179	9.8756	14.8677	20.6338	9.06134	14.9332	21.992	10.6722	15.708	14.9878	9.09651	14.616	17.7656	9.69801	12.9053	16.1199	11.5643	16.9937	17.3837
ENSG00000171574	ZNF584	9.7883	7.44146	1.64257	1.66861	5.90143	2.15839	1.58725	7.26599	2.14053	3.15518	6.94087	3.0134	4.72619	4.56733	4.11679	5.95945	5.7341	2.07832	3.35839
ENSG00000111405	ENDOU	0	0.007632	0.016804	0	0	0	0.04754	0	0	0	0	0	0.021114	0	0	0.021868	0	0	0.035787
ENSG00000111404	RERGL	0	0	0	0	0	0	0	0.239606	0	0	0	0	0	0	0	0	0	0	0
ENSG00000135502	SLC26A10	11.3239	11.9335	9.44289	11.7094	11.5614	10.1236	8.75393	12.0384	12.3845	10.791	11.467	11.8045	9.32158	13.9351	12.6689	11.8789	12.6521	12.8863	8.17817
ENSG00000135503	ACVR1B	9.33435	7.14346	2.9306	4.39633	7.95648	2.323	2.71433	10.6083	5.05023	5.89396	8.90964	2.35867	4.87344	9.65352	5.71323	8.02177	7.36056	2.27798	4.91172
ENSG00000087128	TMPRSS11E	0	0	0	0	0	0	0	0	0	0.023157	0	0	0	0	0	0	0	0	0.020504
Human_newGene_29712	Human_newGene_29712	0.519533	1.7505	0.938054	0.855663	1.06365	1.52872	0.727845	0.844498	1.10379	1.64391	1.12092	0.911782	0.90602	1.00295	1.10351	1.42685	1.55905	0.81584	0.292853
Human_newGene_15864	Human_newGene_15864	0.558393	0.420288	0.929072	1.00925	0.786839	1.10977	1.39488	0.208746	0.230941	0.325875	0.118969	0.075946	0	0.305934	0.188065	0.233975	0.228947	0.709321	0.255987
Human_newGene_11364	Human_newGene_11364	3.18894	4.48805	0.612934	0.87995	3.89564	0.924134	0.764981	2.22612	1.17463	1.79039	2.41947	0.72319	1.27255	2.34062	1.10509	1.55927	2.4665	0.671746	0.744017
Human_newGene_11363	Human_newGene_11363	0	0.557417	0	0	0	0	0	0	0	0	0	0	0	0	0	0	0	0	0
Human_newGene_34574	Human_newGene_34574	0.114995	0	0	0	0.314377	0.104733	0	0.308839	0	0	0	0.10952	0	0.248839	0.087685	0.426633	0.234311	0	0.197564
ENSG00000041802	LSG1	18.8501	19.3999	13.0717	8.98703	19.2965	12.0437	8.10232	16.7338	8.59533	14.0455	16.0987	8.87357	8.68446	15.4772	10.4381	12.2052	15.111	8.16536	7.19441
ENSG00000273398	AC017083.3	0.124181	0.15474	0.239147	0.041566	0.116052	0.011769	0.014397	0.086231	0.024691	0.023922	0.122867	0.038157	0.053834	0.191437	0.303503	0.095282	0.072335	0.039468	0.026964
ENSG00000174903	RAB1B	110.234	115.737	176.742	193.383	107.213	168.714	190.149	92.3291	144.346	121.69	97.1342	134.354	136.009	94.6697	125.666	119.797	97.7145	137.288	136.809
ENSG00000102763	VWA8	3.75968	3.49088	2.60795	2.50166	3.46985	2.90752	2.54411	3.759	2.54664	2.39605	3.88009	3.06983	1.96659	4.41929	2.61781	2.34171	3.8208	2.43228	2.27574
ENSG00000102760	RGCC	0.984495	1.55454	0.478573	0.228847	0.490771	0.468095	0.237402	1.7636	0.486728	0.77647	2.31464	1.5932	1.34957	1.49156	0.679225	1.22557	1.16665	1.03562	1.01627
Human_newGene_25819	Human_newGene_25819	0.428838	0.296769	0	0	0.230793	0.058988	0	0.194119	0.193926	0.067192	0.488551	0.070804	0.034923	0.38852	0.258791	0.286945	0.38943	0.10566	0.159654
Human_newGene_25818	Human_newGene_25818	0.239445	0.37325	0.293871	0.155843	0.585406	0.645719	0.142539	0.24267	1.07469	0.527314	0.31636	0.476098	0.436952	0.279667	0.520835	0.383634	0.253784	0.783627	0.176979
ENSG00000198455	ZXDB	3.47728	3.62858	2.13314	1.59902	2.9549	2.55849	1.37878	3.73684	2.54654	2.96805	3.69135	2.8284	2.7095	3.36267	3.27064	3.11461	3.42202	2.76626	2.40219
ENSG00000198453	ZNF568	3.99431	3.22802	2.27432	1.64513	3.63577	1.2457	1.51094	4.49636	2.2904	2.32542	5.2774	1.99124	1.45177	3.49542	2.42211	1.91845	3.63211	1.50499	1.50446
ENSG00000109790	KLHL5	24.9065	26.71	20.4724	19.6582	23.9868	24.9553	21.0489	22.5045	17.5001	22.0028	26.7669	21.0609	15.9203	22.9049	18.2416	23.5376	25.2963	19.6717	19.3175
ENSG00000147488	ST18	0	0	0	0	0	0.008436	0	0.014662	0	0	0	0	0	0	0	0	0	0	0
ENSG00000109794	FAM149A	0.948518	1.56279	1.02201	1.05486	1.30137	1.04912	0.767809	1.22432	0.800839	0.829766	1.5787	0.803051	1.14796	1.48897	1.18124	1.50538	1.27252	0.879643	0.852457
ENSG00000147485	PXDNL	0.053312	0.047348	0.050278	0.018887	0.019518	0.076034	0.012309	0.0332	0	0.02052	0.061229	0.031888	0.010603	0	0.037544	0.021964	0.034379	0	0
ENSG00000147481	SNTG1	0	0	0	0	0	0	0	0	0	0	0	0	0	0	0.015819	0	0	0	0
Human_newGene_26750	Human_newGene_26750	0	0	0.662881	0.620717	0	0.194699	0.562612	0.054604	0.181524	0.574284	0.092275	0.166317	0.779989	0	0.235271	0.338545	0.091631	0	0.528662
Human_newGene_23413	Human_newGene_23413	0.590418	0.319307	0.107093	0	0.085507	0.090611	0	0.105656	0.032635	0.057058	0.058186	0.029788	0	0.039168	0	0	0	0	0
ENSG00000250349	AF241726.2	0	0	0	0	0	0	0	0	0	0	0	0	0	0	0	0	0	0	0
ENSG00000068885	IFT80	5.68376	5.65261	4.14528	5.77864	6.30879	5.15928	4.94304	7.96771	5.87365	5.00246	8.81523	5.81196	4.1587	8.55251	6.81706	6.47081	7.43302	6.56585	5.62046
ENSG00000136856	SLC2A8	4.81977	4.56878	5.60166	3.35183	4.67647	3.37681	3.33698	3.12256	3.90345	4.84364	4.37054	2.60424	3.40729	2.676	3.89326	4.80394	4.98155	3.88367	3.36473
ENSG00000136854	STXBP1	11.2717	10.2393	9.95433	8.51244	10.4993	10.2905	8.01985	13.2186	12.272	12.1973	13.9068	11.8474	10.1919	11.9494	10.3466	10.5589	12.0892	11.0436	8.92518
ENSG00000132570	PCBD2	2.98193	3.44097	4.0775	4.09952	3.3628	3.4704	4.7972	2.81919	3.1304	2.28316	3.71865	3.03965	2.45084	3.88015	2.68456	2.04704	3.70668	3.83544	2.99643
ENSG00000136859	ANGPTL2	1.50217	1.39047	0.738875	0.651257	1.27788	0.783416	0.318461	1.8104	1.25038	1.10353	1.72752	0.932979	0.999839	1.87658	1.52133	1.33696	1.64229	0.861218	0.545181
Human_newGene_35195	Human_newGene_35195	0.328036	0.963272	0	0	0.991999	0	0	1.00338	0.008891	0.382223	0.039551	0	0	0.085787	0.40058	0.006219	0.021065	0.014054	0
Human_newGene_35194	Human_newGene_35194	1.92777	1.0741	0.352356	0.657922	0.918907	0.413314	0.669028	1.51533	1.04108	0.572381	1.43218	0.754752	0.221575	1.51603	0.902351	1.05911	1.34247	0.841009	0.272982
ENSG00000285304	Z83844.3	7.38206	7.50622	12.3481	9.42163	1.91832	9.72059	4.48187	8.07547	7.85457	8.72086	7.25563	7.36575	11.847	7.61674	6.30216	6.25111	0	8.25063	5.77932
Human_newGene_39496	Human_newGene_39496	0.238913	0.107813	0.577209	0.479542	0.060064	0.584505	0.072128	0.093931	0.420952	0.105491	0.170191	0.226596	0.124261	0.301545	0.322051	0.33359	0.06715	0.293052	0.390292
ENSG00000065457	ADAT1	10.5194	13.2188	6.04878	4.85898	11.0681	5.53589	3.87526	12.0578	5.96352	7.9917	10.6195	4.41418	4.32204	11.4341	7.05014	7.18273	12.1699	3.9373	4.23261
ENSG00000172081	MOB3A	8.17191	7.67413	1.97448	1.78683	7.66247	1.97967	0.888149	6.18056	2.13768	4.30193	6.60658	1.63162	4.02095	5.70953	3.35446	4.53294	7.055	0.784993	1.87269
ENSG00000172086	KRCC1	0.522493	0.709592	0.824316	0.364886	0.659414	0.645971	0.686146	0.579983	0.765751	0.9856	0.464472	0.475914	1.14546	0.63122	1.06314	0.769192	0.500714	0.504681	0.630332
ENSG00000108774	RAB5C	105.658	106.154	80.7394	82.3844	61.3929	133.689	78.465	49.0928	74.436	59.0988	89.4194	119.399	110.801	52.7968	66.0668	58.4708	92.1319	73.7473	63.9824
ENSG00000108773	KAT2A	28.607	31.4644	30.8572	30.6166	31.6543	31.9602	28.9669	22.7922	29.9835	28.9176	21.5481	26.4328	23.6788	21.0972	29.2861	26.8686	24.0675	23.9752	22.6798
ENSG00000108771	DHX58	0.05115	0.104869	0.195428	0.23473	0.016892	0.153439	0.752202	0.037935	0.202921	0.288947	0.10729	0.322329	0.263828	0.058889	0.309829	0.187131	0.062981	0.175427	0.717022
ENSG00000146281	PM20D2	9.88645	8.43315	5.90467	6.60214	8.43532	5.49861	5.82904	9.43954	6.84229	6.75035	9.72573	5.69	4.16974	9.59421	7.44834	6.61916	9.2007	5.45975	5.95171
Human_newGene_3520	Human_newGene_3520	0.309585	0.321632	0.303278	0.130034	0.309025	0	0	0.129297	0.320695	0	0.404822	0.200348	0	0.161694	0.17885	0	0.434641	0.413916	0
ENSG00000146282	RARS2	9.7798	10.2736	12.886	9.293	9.99492	11.8251	10.733	11.9753	11.3988	9.66867	10.7723	12.1075	8.50237	12.9078	11.281	8.98494	9.56773	11.8612	9.56392
ENSG00000146285	SCML4	0	0	0	0	0	0	0	0	0	0	0	0	0	0	0	0	0	0	0
ENSG00000063854	HAGH	4.66511	5.48029	9.29396	13.2936	4.7437	7.80522	14.1416	8.48255	11.4451	10.8481	10.1043	15.0116	15.6196	9.06024	9.04684	13.7673	8.57336	15.0207	16.628
Human_newGene_7412	Human_newGene_7412	0	0.074388	0.084327	0.445278	0	0.231293	0.09433	0	0.086944	0.208792	0.075257	0.342614	0.325022	0	0.262991	0.516176	0	0.149723	0.294213
Human_newGene_32641	Human_newGene_32641	0.077027	0.200081	0.189646	0	0.37216	0	0	0.073426	0.080909	0.241757	0	0.073851	0.033374	0.156741	0	0.170902	0.11455	0	0
ENSG00000066379	ZNRD1	9.64227	10.9063	18.2502	14.6434	11.5947	17.9625	12.9672	12.1287	20.1403	18.1439	11.479	18.5602	17.481	12.0162	19.7687	15.6481	10.4795	23.131	13.6086
Human_newGene_32648	Human_newGene_32648	0.102116	0.217256	0.490355	0.189107	0.270052	0.302138	0.334062	0.417496	0.44094	0.293867	0.222773	0.182436	0.217518	0.362658	0.375781	0.163794	0.368085	0.298253	0.180516
Human_newGene_9529	Human_newGene_9529	0	0	0	0	0	0.523663	0	0	0	0	0	0	0	0	0	0	0	0	0
ENSG00000132394	EEFSEC	5.83165	6.2291	5.56691	3.23577	5.32508	5.345	3.54122	5.84913	3.36697	3.89562	5.6488	4.07457	3.19347	5.44219	3.22941	3.35624	6.20829	4.60014	3.56086
Human_newGene_9524	Human_newGene_9524	0.566972	0.097985	0	0	0	0	0	0	0	0	0	0	0	0	0	0	0	0.086899	0
ENSG00000145390	USP53	5.95342	5.5174	1.45122	1.73708	3.75854	1.68823	1.01133	5.20782	1.23454	3.36854	4.66314	0.813361	1.71842	5.28828	2.01471	2.93745	4.85153	0.995197	1.3026
ENSG00000145391	SETD7	14.8665	15.3655	9.43527	11.7904	15.4719	9.54801	10.7359	14.0831	9.94056	11.2923	14.21	8.41385	7.12657	13.3427	10.379	11.1737	14.1079	8.09017	8.24314
ENSG00000133627	ACTR3B	0.881081	0.637244	0.724867	0.35574	1.16135	0.668554	0.394757	0.854813	0.813036	0.888649	0.753637	0.681505	0.953556	0.972219	0.925596	0.857397	0.940969	0.701395	0.622175
ENSG00000138639	ARHGAP24	0.568243	0.573684	0.161869	0.213973	1.18216	0.164791	0.033806	1.2288	0.160352	0.745983	0.731958	0.143645	0.100291	1.44466	0.250139	0.270651	1.66007	0.123374	0.058716
ENSG00000139946	PELI2	0.977925	0.874358	0.151578	0.284915	0.956106	0.345437	0.243607	2.01231	0.506957	1.00735	2.24431	0.389395	0.500761	2.02497	0.683586	0.918466	1.98456	0.57283	0.373828
Human_newGene_36884	Human_newGene_36884	0.150698	0.373985	0.119831	0.039108	0.134408	0.307242	0.061592	1.10982	0.61002	0.569259	1.29158	0.605618	0.239755	1.0179	0.934269	0.496407	1.00851	0.515508	0.246329
Human_newGene_39854	Human_newGene_39854	0	0	0	0	0	0	0	0.485734	0	0	0	0	0	0	0.155937	0	0	0	0
Human_newGene_39850	Human_newGene_39850	0	0	0	0	0	0	0	0	0	1.47028	0	0	0	0	0	0	0	0	0
ENSG00000101442	ACTR5	9.62335	8.51885	2.46378	2.84057	9.35465	2.47787	2.18372	7.95433	3.52359	5.80166	7.26547	2.33129	3.67898	8.5519	4.27732	5.53191	8.08006	2.16607	2.90541
ENSG00000101443	WFDC2	0.41119	0.543451	0.89089	1.70411	0.7875	1.67376	1.93295	1.6213	4.09083	3.25766	2.4222	2.9222	3.49905	2.53964	4.18422	5.84135	2.68273	3.939	4.28581
ENSG00000101440	ASIP	0.370189	0.270043	0.259789	0.435841	0.304168	0.40244	0.159644	0.261685	0	0.326308	0.235873	0.187494	0.126785	0.178439	0.209021	0.045301	0.044755	0.267717	0
ENSG00000101441	CST4	0	0	0	0	0	0	0.074292	0	0	0	0	0	0	0	0	0	0	0.146034	0
ENSG00000101446	SPINT3	0	0	0	0	0	0	0	0	0	0	0	0	0	0	0	0	0	0	0
ENSG00000101447	FAM83D	53.7632	57.0985	6.74393	9.80311	71.8214	13.1739	11.045	44.4346	10.3944	29.0564	86.9952	14.5657	24.3556	41.8382	15.8861	29.694	83.5228	13.6364	18.0979
ENSG00000101444	AHCY	243.862	257.439	386.465	389.697	248.012	379.728	392.118	223.853	323.882	240.963	232.537	327.773	286.909	223.809	294.127	247.866	239.973	327.371	318.074
ENSG00000101445	PPP1R16B	1.39582	1.4923	0.964381	0.586372	1.60097	0.686638	0.527206	3.62321	1.0208	1.38372	3.58395	1.17735	0.47467	3.21935	0.807689	1.626	3.76098	1.38218	0.865046
ENSG00000145649	GZMA	0	0	0	0	0	0	0	0	0	0	0	0	0	0	0	0	0	0	0
ENSG00000101448	EPPIN	0	0	0	0	0.024787	0.094133	0	0	0	0	0.025301	0.022534	0	0.076759	0	0	0	0	0
ENSG00000214063	TSPAN4	15.3296	15.4566	26.5508	39.5198	14.8913	25.5765	36.4935	14.9984	25.7148	25.0502	14.7758	27.6949	26.2023	14.307	19.7414	22.5016	15.1044	24.8019	35.553
ENSG00000137812	KNL1	8.76896	9.60688	4.00944	4.2511	11.3298	4.66692	3.2186	10.5599	4.61547	5.88306	11.6213	5.24682	2.33617	10.649	5.11266	6.56598	12.2373	5.06674	3.33818
ENSG00000172339	ALG14	0.93532	0.97126	0.64823	0.456999	0.779912	0.640134	0.526499	0.718002	0.5064	0.348976	0.619084	0.47186	0.268759	0.743358	0.505549	0.338998	0.619741	0.466421	0.327806
ENSG00000137814	HAUS2	2.58698	3.82892	3.51732	3.29606	2.88311	3.98408	3.36358	3.99863	4.2358	3.00776	10.0753	3.3834	4.29797	2.56198	4.50619	4.77435	3.72504	4.44067	5.63048
ENSG00000137815	RTF1	13.9608	14.7631	3.52427	2.90352	15.053	3.6794	1.65426	16.3868	4.40197	8.32601	14.2761	2.65966	4.02363	15.4854	5.6435	8.83022	14.5355	2.77872	2.62352
ENSG00000137817	PARP6	22.4656	20.1635	21.2322	29.2384	20.191	24.3652	28.0352	18.5388	16.47	15.7613	15.8625	14.5119	15.9252	16.2919	16.8914	19.2918	15.4366	16.2036	17.0679
ENSG00000137818	RPLP1	893.421	689.442	2434.19	4378.41	852.283	2498.74	3683.11	1138.08	2736.06	3521.78	1195.84	2885.44	4465.52	1231.88	2589.5	3179.9	1088.01	3117.41	4261.31
ENSG00000137819	PAQR5	2.98952	2.75074	3.93241	4.08629	4.06135	3.01573	2.46746	6.05393	3.2795	4.10728	6.15571	2.34735	4.79251	4.8652	2.89899	4.80328	3.758	3.28758	2.71903
ENSG00000172331	BPGM	3.11575	3.41129	1.50285	2.11939	3.30991	2.52146	2.34898	3.75467	1.88678	2.81185	3.57166	1.39115	2.34217	3.3464	2.33498	3.30842	3.30983	1.6458	1.97028
ENSG00000172336	POP7	25.1696	25.355	16.913	11.4792	24.5072	17.8464	10.3588	21.7741	18.3006	21.256	21.7344	12.0264	23.2351	22.8204	17.9802	23.2226	21.6302	11.626	11.9224
ENSG00000173068	BNC2	5.82817	6.53026	1.77327	2.22217	6.07311	2.02738	2.29483	4.44591	1.56294	2.66212	6.09209	1.60015	1.88073	5.17076	2.10169	4.4832	5.7269	1.13546	1.19096
ENSG00000173065	FAM222B	13.6055	14.3414	0.970279	3.54706	13.0986	2.14092	2.05606	11.0194	3.33711	9.13971	10.6978	1.06484	5.53522	10.8934	4.76192	9.28739	11.0685	1.11254	2.73084
ENSG00000173064	HECTD4	4.82815	5.54311	3.37948	2.97359	5.33023	3.17549	2.52829	4.57202	2.73176	3.11089	4.7121	2.71144	1.67913	4.67293	3.32198	3.23354	4.57208	2.57592	1.44648
ENSG00000273841	TAF9	61.4041	59.8379	109.63	103.061	72.4537	108.971	104.957	60.3626	92.6034	58.9364	61.1719	103.473	84.9969	59.199	90.1042	68.6452	62.4317	98.9748	95.0972
ENSG00000138092	CENPO	49.3378	48.417	22.3818	15.9373	48.9574	22.8618	13.7856	39.2333	16.1489	23.5149	40.7342	12.4979	12.2218	38.6771	19.4112	24.6908	39.8958	12.9284	9.65941
ENSG00000138095	LRPPRC	54.8198	59.925	42.4818	32.7277	61.9186	38.2233	31.7827	45.1469	30.998	30.5463	44.5966	29.3526	20.9158	47.1672	34.8894	29.4533	46.8375	29.2378	19.7053
ENSG00000267855	NDUFA7	22.0462	23.0318	44.2919	67.0972	21.1864	46.7114	70.8572	22.3045	46.269	53.9637	24.4542	52.6618	68.5523	25.2083	29.3013	50.1941	27.5037	58.006	66.1752
ENSG00000054148	PHPT1	21.6363	18.8836	48.9147	66.2285	17.5801	49.6336	68.9325	21.638	49.1239	49.246	16.9923	46.0909	73.1456	25.0179	43.3326	50.0626	22.6759	66.1169	67.9368
Human_newGene_10059	Human_newGene_10059	0	0.484163	0	0	0	0	0	0	0	0	0	0	0	0	0	0	0	0	0
ENSG00000080618	CPB2	0.023835	0	0	0	0.032521	0	0	0	0	0	0	0	0	0	0.032096	0	0.063624	0	0
ENSG00000085224	ATRX	15.5151	13.7445	9.13578	9.14131	14.4508	8.0431	7.86713	20.5915	10.4769	10.6931	17.1892	9.9048	6.39472	16.7944	15.188	19.7231	17.3845	9.97121	8.3203
Human_newGene_43967	Human_newGene_43967	0.486756	0.540148	0.563081	0.179472	0.462276	0.50024	0.231671	0.10937	0.060057	0.210706	0.362767	0.441509	0.208708	0.240719	0.292546	0.588495	0.431558	0.331679	0.24474
Human_newGene_43966	Human_newGene_43966	0	0	0.498805	0	0	0	0.259147	0.09246	0	0	0	0	0	0	0.066998	0	0	0	0
ENSG00000144119	C1QL2	0.158466	0.045355	0.310563	0.274779	0.03584	0.485386	0.228765	0.38606	0.625675	0.553869	0.27068	0.616111	1.09833	0.251448	0.23477	0.568057	0.312291	0.549506	0.568355
ENSG00000144118	RALB	37.8751	32.064	40.6554	35.2425	33.0964	35.1197	38.0023	36.909	36.3902	30.5134	42.0616	31.6796	26.9996	35.0361	29.4656	36.3636	30.2623	30.9564	23.5631
ENSG00000144115	THNSL2	1.04552	1.01465	0.958665	0.644226	0.487773	1.2758	0.711835	1.08974	1.62611	0.930721	0.963406	1.29545	1.61854	1.25113	1.81297	1.2444	1.08013	1.05199	1.2842
Human_newGene_30485	Human_newGene_30485	1.01872	0.547103	0.743643	0.438003	0.798523	0.520481	0.500998	0.734983	0.70647	0.565002	0.973197	0.624633	0.396066	1.04456	0.490259	0.640439	0.894419	0.466467	0.586449
Human_newGene_49613	Human_newGene_49613	0	0	0.059542	0	0	0.248028	0	0.057825	0	0.052731	0	0	0	0	0	0.057641	0	0.465824	0
ENSG00000100311	PDGFB	0.656612	0.797948	0	0.228525	0.877632	0.104473	0.041493	2.66695	0.847865	1.82863	2.36468	0.176634	9.00358	2.46184	2.40196	2.4383	2.59601	0.259926	1.31039
ENSG00000150433	TMEM218	5.97109	4.67431	6.76849	4.32318	6.08178	6.38984	5.70411	5.8677	7.08679	3.65148	6.37069	4.94934	3.6324	6.72124	4.05513	5.30449	6.62978	3.95556	3.08857
ENSG00000104671	DCTN6	18.0474	17.6505	19.297	11.9251	16.4735	17.6747	15.4487	18.1022	15.2517	13.6425	18.1933	15.5678	12.8838	18.9832	16.0608	12.4642	19.2028	15.2975	11.8022
ENSG00000100314	CABP7	0.134799	0.226695	0.2289	0.12573	0.172897	0.173609	0.158073	0.371755	0.182045	0.159506	0.260674	0.043815	0.165112	0.225587	0.142606	0.119233	0.265379	0.137517	0.180311
ENSG00000100316	RPL3	1029	1044.03	1825.08	1830.69	1294.5	1875.4	2080.18	1563.51	2289.96	1951.41	1375.92	2618.34	2794.28	1321.03	2288.94	2001.84	1434.55	2564.41	2795.25
ENSG00000100319	ZMAT5	8.97551	12.612	16.6586	10.3204	11.2822	17.0489	12.675	7.96637	10.5712	7.14847	10.7987	14.6888	8.92638	9.96567	11.4174	7.83775	9.66971	13.4156	10.065
ENSG00000104679	R3HCC1	15.4961	12.6835	15.6244	5.18393	11.0235	10.391	7.86798	12.7865	8.5835	6.31282	12.3414	10.3216	8.76933	11.1372	12.3396	8.24117	10.7585	12.4393	7.07528
ENSG00000238227	TMEM250	5.23363	9.80654	3.57744	3.44938	4.28995	4.10658	2.53659	2.62358	5.0839	4.49174	1.05399	1.58825	3.60946	4.62304	3.30431	2.89997	6.57342	2.40016	3.65352
Human_newGene_25805	Human_newGene_25805	0.471648	0.451728	0.453967	0.34288	0.412277	0.658579	0.282762	0.144182	0.378211	0.272516	0.178867	0.381748	0.210555	0.170368	0.480144	0.278344	0.152315	0.339761	0.36455
ENSG00000156873	PHKG2	9.59651	9.60403	10.2249	2.35909	11.1285	9.62144	6.13716	9.83644	8.1584	6.46653	8.23786	7.64153	5.76923	9.2485	3.75976	4.05309	9.31767	9.27789	5.60297
ENSG00000203783	PRR9	0.119031	0.147627	1.49155	0.533105	0.391	0.80687	0.776089	0.039381	0.35745	0.536355	0.161985	0.663706	0.620983	0.081588	0.263525	0.337473	0.221749	0.46849	0.469059
ENSG00000203780	FANK1	5.60789	4.54275	5.39124	3.15804	5.47933	4.74962	4.58339	3.32522	3.23251	1.69865	4.16373	3.06557	2.64792	3.36633	2.46475	3.67705	4.16966	2.99326	1.92235
Human_newGene_34904	Human_newGene_34904	0	0.097426	0.22719	0	0	0	0.505514	0.154783	0	0	0.43463	0.45241	0.199012	0	0.097664	0.12834	0	0.086146	0.382526
ENSG00000203786	KPRP	0.043377	0	0	0	0	0	0.071202	0	0.02263	0.019849	0	0	0	0	0	0	0	0	0.037261
ENSG00000156876	SASS6	5.03415	4.70653	0.722965	1.01387	4.54983	0.783773	0.523363	5.92704	1.41628	3.20731	5.97373	0.763821	0.887679	5.91218	2.39974	3.44902	5.14144	0.969908	0.724013
ENSG00000156875	MFSD14A	16.351	16.41	4.23198	3.42395	14.5169	4.45771	2.92924	16.3293	4.95151	9.31435	14.6814	3.51318	7.19204	15.9824	6.15097	10.1216	13.8156	4.04765	4.90708
ENSG00000203785	SPRR2E	0	0	0	0	0	0	0	0	0	0	0	0	0.069478	0	0	0	0	0	0
ENSG00000181371	OR5M8	0	0	0	0	0.094083	0.149547	0	0	0	0.047243	0	0.113568	0	0	0	0	0	0	0.044343
ENSG00000182938	OTOP3	0	0	0	0	0	0	0	0	0	0	0	0	0	0	0	0	0	0	0
ENSG00000181374	CCL13	0	0	0	0	0	0	0	0	0	0	0	0	0	0	0	0	0	0	0
ENSG00000172687	ZNF738	1.8128	2.61529	1.28253	0.692435	1.84662	1.62424	0.612886	1.59512	1.43888	1.44835	2.77236	1.35007	0.968691	2.77371	2.28102	1.5878	2.56049	1.9435	1.04609
ENSG00000181378	CFAP65	0.150919	0.027262	0.015478	0.009436	0.088999	0.016658	0.20889	0.102992	0.009031	0.080474	0.044151	0.066517	0.017117	0.042491	0.047048	0.066053	0.035155	0.072083	0.020415
ENSG00000182931	WFDC10B	0	0	0.083926	0	0	0	0	0	0	0	0	0.081705	0	0	0	0.083758	0	0	0
ENSG00000112812	PRSS16	0.528377	0.68885	0.267676	0.27198	0.80509	0.386122	0.182142	1.16175	0.413933	0.612973	1.20309	0.270701	0.70398	1.14998	0.806719	0.663904	1.29893	0.41287	0.250339
ENSG00000182934	SRPRA	39.0348	40.4039	45.352	43.2938	38.5693	45.2718	41.8948	39.6999	50.7167	44.8752	40.2145	48.151	48.2155	38.8307	50.4655	43.5797	39.2904	47.5116	49.7057
ENSG00000198443	KRTAP4-1	0	0	0	0	0	0	0	0	0	0	0	0	0.041053	0	0	0	0	0	0.035915
ENSG00000064195	DLX3	0.421861	0.407397	0.342833	0.559615	0.170358	0.853474	0.959748	2.40231	1.0748	1.99871	1.73327	1.4588	2.62869	2.85858	1.66757	2.1152	1.82039	1.59325	3.32057
ENSG00000064199	SPA17	8.41898	8.77693	14.6401	12.0046	11.5902	15.3163	12.3223	10.2259	19.0537	5.95457	10.5966	15.1249	12.4334	10.8856	18.5225	6.15435	10.8983	20.8831	8.95544
ENSG00000086758	HUWE1	54.742	55.8439	41.0564	50.3802	59.2889	30.852	34.07	48.8794	32.9406	37.5043	49.1137	32.9354	20.0383	45.732	33.9818	39.548	45.9049	28.2061	35.1029
ENSG00000175946	KLHL38	0	0.058831	0	0.04223	0.02485	0	0	0.025908	0	0	0.049292	0.051942	0.073708	0	0	0.026623	0.027782	0	0
Human_newGene_40709	Human_newGene_40709	0.661254	0.653458	0.411999	0.138127	0.636822	0.330644	0.426938	0.838467	0.447923	0.526551	0.701511	0.656383	0.417388	0.897178	0.675014	0.532419	0.661233	0.540552	0.41185
Human_newGene_40700	Human_newGene_40700	0.351132	0.485925	0.103544	0.286173	0.962913	0.126857	0.121742	0.464889	0.209646	0.432904	0.423396	0.18013	0.108945	0.486052	0.379196	0.623664	0.43953	0.266713	0.204438
ENSG00000260851	AC010542.3	0	0.041831	0	0	0.150012	0	0	0.337001	0	0.172759	0.224271	0	0.074616	0.407901	0.137106	0.093782	0.24015	0	0.077683
ENSG00000169660	HEXD	5.50614	6.02801	6.37811	6.47853	5.1652	6.51617	4.91164	5.57511	7.19928	5.23919	4.75772	7.66455	6.9475	4.50972	5.51198	4.71531	5.39534	5.41083	4.38305
ENSG00000156299	TIAM1	15.3548	13.9216	2.35624	4.8723	13.1872	3.84306	4.05567	12.0975	3.39235	8.35945	11.3472	3.18456	3.51351	13.3463	5.57934	9.52825	11.0891	2.70109	3.95994
ENSG00000156298	TSPAN7	2.33442	2.98631	2.91491	4.92528	1.78998	3.51253	4.18405	4.63347	6.75147	8.01996	4.78448	6.98447	7.86015	4.88553	7.57141	6.0518	5.72792	5.95126	8.19751
ENSG00000168398	BDKRB2	0.039453	0.141363	0.045213	0.102814	0.035953	0.030194	0.012961	0.890248	0.539079	0.474684	0.680011	0.178466	0.146279	0.600534	0.371787	0.492225	0.642372	0.139503	0.175109
ENSG00000168393	DTYMK	52.1327	53.8079	78.0513	42.6917	60.0433	80.4128	50.5965	46.9513	50.0465	35.9917	51.8587	55.7729	34.0789	52.3744	48.2903	36.1691	50.0895	56.1193	32.6438
ENSG00000269533	AC003002.3	0	0	0	0	0	0	0	0	0	0.038583	0	0	0	0	0	0.015136	0	0	0.016804
ENSG00000168397	ATG4B	19.3151	18.6677	19.1704	18.0688	27.4065	19.1163	15.4243	16.1304	17.3258	17.835	20.7117	16.4208	11.9225	22.2355	16.2024	19.6798	21.1395	18.2469	12.0436
ENSG00000168395	ING5	14.4104	14.4319	7.59682	6.93168	15.8485	7.94907	6.38698	15.5899	6.85505	9.0257	15.8847	6.29099	7.35536	16.2601	8.22656	9.29765	14.0413	6.21502	7.35992
ENSG00000168394	TAP1	13.8984	12.5763	18.7343	22.451	13.9802	17.7711	19.7299	14.8411	22.2709	30.4913	15.6272	18.1557	25.4947	14.6982	21.1641	31.0168	15.2568	18.6818	24.2263
ENSG00000197822	OCLN	10.1565	8.79971	5.19921	5.46372	10.5903	6.13142	3.69846	7.89425	2.24355	5.14333	7.73293	2.43465	1.36885	7.79067	2.97848	4.73676	8.11214	2.54426	3.00941
ENSG00000197826	CFAP299	0	0	0	0	0	0	0	0	0	0	0	0	0	0	0	0	0	0	0
ENSG00000228083	IFNA14	0	0	0	0	0	0	0	0	0	0	0	0	0	0	0	0	0	0	0.046896
ENSG00000180425	C11orf71	3.66816	3.72569	6.03479	4.96874	3.58567	7.11924	6.49907	4.58949	6.65732	4.0869	3.63896	5.95763	3.96832	3.75071	5.44779	4.09595	4.3217	5.70886	3.75348
ENSG00000180424	DEFB123	0	0.458804	0	0	0	0	0	0	0	0	0	0.099478	0	0	0.089999	0	0	0.105074	0
ENSG00000180423	HARBI1	1.68994	2.22512	1.28141	0.669642	3.0468	1.56402	0.646519	2.03514	1.07905	1.66876	2.03701	0.490841	1.46612	2.4398	1.67045	1.79069	1.83043	0.648462	0.807368
ENSG00000103152	MPG	21.2912	22.8999	43.2367	25.9816	22.1207	37.7518	29.7232	22.1114	35.8049	25.9417	23.3815	34.2906	30.6541	23.4426	30.655	24.4701	24.5641	35.5177	27.4554
ENSG00000103150	MLYCD	0.092995	0.13366	0.096481	0.049321	0.144921	0.135757	0.045364	0.202605	0.160674	0.115776	0.16328	0.154025	0.256754	0.198273	0.20358	0.181212	0.222609	0.159334	0.158625
ENSG00000123500	COL10A1	0.061568	0	0.052653	0.042173	0.041466	0.096025	0.032458	0	0	0.008663	0.012935	0	0.014565	0.036616	0.039961	0	0.077257	0	0
ENSG00000123505	AMD1	33.6486	30.4329	9.03008	10.0979	21.5317	10.7014	7.83426	23.5016	7.22554	12.2881	21.812	8.16378	11.2384	35.2943	7.50683	11.718	29.0649	4.29447	7.86598
ENSG00000151475	SLC25A31	0	0	0	0	0	0	0	0	0	0	0	0	0	0	0	0	0	0	0
ENSG00000156127	BATF	0	0	0	0	0	0.106514	0	0	0	0.050473	0	0	0	0	0	0	0	0	0
ENSG00000153187	HNRNPU	123.605	136.084	98.2692	74.7241	133.199	99.5128	75.7855	121.319	96.4839	80.7276	130.734	72.0231	58.2575	134.245	93.33	62.6936	114.09	111.407	63.7997
ENSG00000013523	ANGEL1	6.13887	6.21231	3.82749	3.97647	5.74076	4.48046	3.08796	6.72322	5.4457	5.99695	6.7327	4.24374	4.64197	6.72669	6.39375	6.11323	6.91556	4.46671	4.05429
ENSG00000142515	KLK3	0	0	0	0	0	0	0	0	0	0	0	0	0	0	0	0	0	0	0
ENSG00000142511	GPR32	0	0	0	0	0	0	0	0	0.044439	0.038458	0	0.040563	0	0	0	0.020791	0	0	0
ENSG00000142513	ACP4	0.396126	0.174609	0.421356	0.210869	0.318292	0.38791	0.301902	0.054829	0.336386	0.435528	0	0.500433	0.334828	0.080697	0.290022	0.255038	0.049925	0.436321	0.425246
ENSG00000142512	SIGLEC10	0.171543	0.165447	0.113538	0.106329	0.165885	0.107911	0.068184	0.23473	0.21656	0.151919	0.220313	0.163741	0.06858	0.231553	0.250491	0.113562	0.217543	0.072684	0.148309
ENSG00000068745	IP6K2	35.2904	37.3815	14.4283	12.4963	37.8189	20.1256	9.02981	34.0475	20.059	24.4806	43.2493	9.46777	18.0067	36.6132	21.7623	25.6901	44.6874	16.3238	15.7285
ENSG00000168539	CHRM1	0	0	0	0	0.016617	0	0	0.086621	0	0.016688	0	0	0.017189	0.051764	0.016927	0	0	0	0.015664
ENSG00000167889	MGAT5B	9.03751	12.0083	9.34346	11.0326	10.4202	8.55415	9.61948	7.58804	6.82914	7.07442	6.58336	6.12547	5.30149	5.60226	6.61558	6.93978	6.62377	6.07338	6.38664
ENSG00000065717	TLE2	7.50588	5.5297	9.14574	12.7087	6.57	8.97368	12.5502	8.81485	15.2342	14.6946	10.2348	15.4364	18.746	11.8629	15.4013	14.8953	11.4478	16.4417	16.907
ENSG00000163704	PRRT3	3.1599	3.42935	2.21179	1.75743	3.03639	2.43285	1.5563	3.17625	2.27293	2.29288	3.03978	1.96922	1.9898	2.99737	2.18776	2.88242	3.45952	1.78122	1.31618
ENSG00000184428	TOP1MT	28.8705	36.5378	38.4567	30.3989	29.8645	36.3266	30.7095	34.1571	36.6368	26.8939	32.6642	32.6012	32.4966	31.8652	28.6854	28.743	33.1937	36.2388	28.5052
ENSG00000163701	IL17RE	0.180272	0.110789	0.048852	0.157618	0.109574	0.080729	0.19485	0.14032	0.258616	0.198053	0.231143	0.244758	0.282412	0.214673	0.157905	0.252421	0.22827	0.229849	0.292182
ENSG00000163703	CRELD1	7.49384	8.80135	11.8417	13.9965	8.61018	10.8623	16.9648	11.0175	16.9182	18.233	10.1125	16.9096	23.4489	11.2669	15.6283	20.9303	11.9544	18.2244	23.1975
ENSG00000167881	SRP68	42.6914	50.8555	38.9205	25.3235	44.2821	37.8978	27.8592	55.032	24.527	27.2845	51.2527	27.8539	29.5082	45.6197	29.4742	31.3973	51.0898	28.2282	26.8333
ENSG00000055950	MRPL43	30.7413	26.4171	39.4364	20.1603	35.0795	38.9471	25.333	29.4769	30.955	20.7881	29.2186	31.2965	21.7673	28.2703	23.6548	19.9886	27.4727	35.7477	19.4993
ENSG00000055957	ITIH1	0	0	0	0.018388	0	0	0.019641	0	0	0	0	0	0.03222	0	0.01869	0	0	0	0
ENSG00000055955	ITIH4	0.242696	0.208665	0.268646	0.675606	0.456362	0.368641	0.560797	0.106915	0.206498	0.352182	0.191382	0.30927	0.226616	0.282921	0.521327	0.401964	0.265822	0.160448	0.177255
ENSG00000136840	ST6GALNAC4	27.7509	27.1533	27.7911	17.595	24.6815	25.7991	19.5298	20.9102	17.0279	14.7832	22.8356	17.5243	18.1004	21.2604	14.9812	14.1012	22.5349	16.7276	12.9948
ENSG00000259384	GH1	0	0	0	0	0	0	0	0	0	0	0	0	0	0	0	0	0	0.117175	0
ENSG00000263761	GDF2	0	0	0	0	0	0	0	0	0	0	0	0	0	0	0	0	0	0	0
ENSG00000204963	PCDHA7	0.509556	0.467243	0.262376	0.192184	0.419669	0.30472	0.095606	0.838004	0.545065	0.528869	0.722486	0.237817	0.182207	0.85047	0.486421	0.732344	1.29275	0.424064	0.308174
ENSG00000137216	TMEM63B	19.9385	19.803	19.6746	24.1162	22.4746	20.387	23.2653	18.4193	16.7509	18.8844	20.6086	17.7341	19.8053	21.0297	15.873	20.1479	22.062	17.8059	17.6465
ENSG00000115137	DNAJC27	2.73474	2.52259	0.90494	0.884809	2.79452	1.22515	0.727231	2.80002	1.3431	2.25413	2.91931	0.9837	1.49967	2.6679	1.61505	2.04564	3.0427	1.07472	1.60196
ENSG00000259040	BLOC1S5-TXNDC5	0	0	0	0	0	0	0	7.33148	0	0	0	0	0	0	0	0	0	0	0
ENSG00000136848	DAB2IP	10.0059	9.87209	1.5139	3.30054	10.0477	1.85143	1.74889	8.42015	3.32279	7.42135	8.96391	0.676132	2.47796	9.68832	3.61352	6.42146	10.5311	1.45229	2.31198
ENSG00000115138	POMC	0	0	0.037078	0	0	0	0	0.105627	0	0	0	0.052581	0	0	0.225054	0.197122	0	0.181391	0.130231
ENSG00000051180	RAD51	6.56431	7.61616	5.299	2.39472	8.11046	3.92669	2.42162	10.3865	3.19045	3.86664	8.53785	2.49554	2.05348	7.25941	4.13091	4.46254	6.76823	2.91522	1.75077
ENSG00000205436	EXOC3L4	0.111673	0.013865	0.030904	0.011848	0.042959	0.05865	0.096205	0.035228	0.024594	0.041894	0.058275	0.133166	0.077247	0.040401	0.112827	0.044721	0.111491	0.044663	0.103329
ENSG00000205439	KRTAP12-3	0	0	0	0	0	0	0	0	0	0	0	0	0	0	0	0	0	0	0
ENSG00000154845	PPP4R1	16.5283	15.5888	7.79394	4.80998	14.1116	7.11782	4.36322	14.0092	5.94386	9.62159	12.9206	4.5788	5.67219	14.2895	6.93065	8.67229	12.593	4.59865	3.8741
ENSG00000157456	CCNB2	90.8375	91.6216	78.1431	24.6814	101.309	89.1581	38.2096	97.3984	52.1853	43.2634	122.821	90.163	35.3341	94.3357	55.741	44.6329	119.376	83.4684	35.6084
ENSG00000166289	PLEKHF1	4.85562	3.75201	0.736692	1.12019	4.09796	0.909104	1.01195	4.69189	1.69808	3.61133	2.64936	0.991939	1.6836	4.23165	2.19342	2.27405	3.19019	1.05211	0.562669
ENSG00000157450	RNF111	15.5926	15.6405	5.49395	6.93713	14.6006	5.56835	5.80917	14.9132	5.7896	9.24656	14.026	3.74285	5.71249	15.1169	6.61862	9.16729	12.4024	4.36639	4.95773
ENSG00000108984	MAP2K6	0.229421	0.447498	0.137221	0.041041	0.24421	0.112368	0.07402	0.420091	0.193113	0.037467	0.46099	0.198521	0.035676	0.64575	0.177009	0.043225	0.424232	0.231657	0.037451
ENSG00000165959	CLMN	1.0514	1.33641	0.436138	0.457878	0.958227	0.4119	0.339642	1.47324	0.674392	0.865218	1.60704	0.7106	0.423118	1.53508	0.714583	0.765416	1.29027	0.538023	0.445436
ENSG00000149527	PLCH2	0	0.008301	0.019403	0.040367	0.018014	0.019153	0.043409	0.009422	0.010347	0.027005	0.033536	0.056756	0.303086	0.046732	0.027617	0.038729	0.027494	0.05724	0.066923
ENSG00000165953	SERPINA12	0.150582	0.067099	0.051488	0	0.061725	0.017877	0	0.017942	0	0.277871	0.01767	0.01837	0.053493	0.021468	0.010101	0.053144	0	0	0.014008
ENSG00000127990	SGCE	18.4248	17.8546	22.4167	25.7375	15.624	19.1779	31.4563	19.7248	24.8586	26.7212	18.6583	23.4233	29.1053	18.2874	24.6622	25.0556	18.9405	24.9255	28.7971
ENSG00000127993	RBM48	2.73127	2.83313	2.03487	2.13172	3.39309	2.09958	1.95986	2.48804	2.28814	3.91164	2.67583	1.99163	3.36947	2.39364	2.89272	3.56756	2.51907	1.84133	2.77422
ENSG00000162078	ZG16B	0.326815	0.36066	0.449855	0.057399	0.218079	0.504783	0.191282	0.297642	0.339033	0.283843	0.239264	0.492995	0.190878	0.347292	0.489086	0.083258	0.510707	0.523697	0.041309
ENSG00000127995	CASD1	3.60788	3.05635	0.769515	0.866611	3.40062	1.39525	0.839264	3.54692	1.19623	2.7826	3.38146	1.01653	1.51127	4.00635	1.77329	2.20781	3.14497	1.70829	1.20795
ENSG00000162076	FLYWCH2	8.26485	8.7823	7.73546	3.33068	8.01229	8.26279	4.56449	10.7755	7.33608	6.06254	10.4099	7.17761	5.60916	9.01064	6.34176	7.90609	11.4886	7.45652	5.05517
Human_newGene_41427	Human_newGene_41427	2.14296	1.88882	1.00044	0.67809	1.77723	0.58968	0.770991	2.0525	0.839829	1.21897	2.43915	0.845599	0.533919	3.01768	1.04807	1.22905	2.62698	1.29824	0.53467
ENSG00000182111	ZNF716	0.278752	0.202497	0.010174	0.036066	0.111536	0	0.039832	0.351614	0.086846	0.196458	0.36056	0.105048	0.073524	0.406075	0.227196	0.293494	0.449435	0.033495	0.053363
ENSG00000166750	SLFN5	1.17518	1.10006	0.642375	0.838524	1.32976	1.07857	0.802878	2.0807	1.45676	2.30916	2.22029	1.14771	2.06535	1.83799	2.06024	2.64553	2.01646	1.24652	1.75399
ENSG00000162073	PAQR4	8.9139	9.44286	3.41867	2.4143	7.91104	2.82074	2.13469	12.0579	5.15812	6.24304	10.7761	2.75985	3.32847	11.2085	5.3343	6.06341	13.0912	3.02513	1.83451
ENSG00000157985	AGAP1	10.4617	10.8183	5.4121	3.87504	11.8039	5.08171	3.81731	11.6913	3.69361	6.30367	10.1648	4.41672	3.84756	11.4589	4.64715	4.42921	11.6223	4.63668	3.3633
ENSG00000254245	PCDHGA3	0.223478	0.337072	0.117387	0.125065	0.086808	0.051385	0	0.330895	0.385583	0.302469	0.422152	0.114599	0.376448	0.394765	0.554241	0.254408	0.540577	0.671265	0.372739
ENSG00000280789	PAGR1	15.9021	17.7747	8.39084	5.09771	16.3093	6.86432	4.65226	14.4547	7.19208	10.3828	12.5614	5.80671	6.43572	13.6409	8.2641	9.88734	12.4347	5.72943	4.56809
ENSG00000165480	SKA3	17.2005	15.199	11.9761	9.47204	20.0593	12.1611	8.83658	14.7152	7.10089	10.0721	16.8139	9.57471	6.57151	14.1099	9.58598	9.10071	15.994	8.69608	6.25997
ENSG00000165487	MICU2	11.0544	10.0759	13.3096	12.059	10.7022	12.3682	12.1744	12.5739	12.7066	12.3482	12.9527	13.7314	13.2252	13.4829	13.0681	12.5916	12.7174	13.8458	13.0712
ENSG00000178235	SLITRK1	0	0	0	0	0	0	0	0	0	0	0	0	0	0	0	0	0	0	0
ENSG00000178234	GALNT11	7.44493	5.32397	3.80497	3.46869	5.82336	3.49372	3.56923	8.38272	5.25218	5.91169	9.33829	4.88835	3.99995	8.33422	5.60219	6.38157	8.61007	5.1483	3.66515
ENSG00000178233	TMEM151B	0.203635	0.366333	0.164723	0.147869	0.190033	0.254899	0.282535	0.622636	0.400401	0.378123	0.40304	0.373042	0.801143	0.185914	0.337493	0.680599	0.369936	0.34857	0.459569
ENSG00000206013	IFITM5	0	0	0.071599	0	0	0	0	0	0.238293	0	0	0.041327	0	0	0	0.071695	0	0.105767	0.217208
ENSG00000005381	MPO	0.0937	0.014507	0.154821	0	0.099577	0.094102	0.099886	0.071553	0.165936	0.061541	0.077909	0.271754	0.21461	0.047936	0.108821	0	0.077071	0.35081	0.194374
ENSG00000154188	ANGPT1	1.07879	0.597873	0.39807	0.173786	0.494424	0.185363	0.085311	0.545371	0.234022	0.29762	0.624701	0.33812	0.199995	0.993095	0.679867	0.356331	0.877287	0.361282	0.135382
ENSG00000158604	TMED4	29.7882	33.4996	40.7879	51.327	31.9352	39.8505	51.1324	34.1785	56.2001	56.3649	35.5116	43.724	59.0109	37.3257	55.4796	61.7934	37.0117	50.4053	64.1581
Human_newGene_50541	Human_newGene_50541	0	0.48982	0	0	0	0	0	0.364037	0	0.323818	0.081182	0	0	0	0	0	0	0	0.03774
ENSG00000009724	MASP2	1.243	0.724092	0.202444	0.176118	1.06089	0.350485	0.174705	0.392838	0.42133	0.558619	0.602143	0.487309	0.405639	0.41523	0.721563	0.489559	0.484203	0.521938	0.430028
ENSG00000185467	KPNA7	0.046998	0.136003	0.167764	0	0.310361	0.265655	0.068574	0.029768	0.080313	0.157518	0.057024	0.193065	0	0.029681	0	0.136126	0.031921	0.102622	0
ENSG00000186652	PRG2	0.323306	0.394462	0.669621	0.60133	0.374071	0.6354	0.728987	0.430093	0.468196	0.476042	0.439056	0.656787	0.597934	0.53116	0.705581	0.467975	0.168722	0.297067	0.469473
ENSG00000101161	PRPF6	31.7872	33.9392	36.1629	32.8623	32.1732	36.3082	33.0444	31.5528	29.4303	26.633	34.6713	33.4319	26.7959	31.7839	28.2748	25.4226	36.2977	31.4956	27.9927
ENSG00000101160	CTSZ	95.534	100.17	163.384	230.904	97.2464	163.68	240.881	114.225	214.825	221.059	117.306	215.885	265.947	118.899	193.054	222.449	132.187	219.425	286.716
ENSG00000101162	TUBB1	0.403493	0.288855	0.151999	0.267676	0.486473	0.208965	0.294072	0.228013	0.207481	0.267435	0.253311	0.149702	0.245754	0.168742	0.281009	0.227621	0.293595	0.301037	0.241049
ENSG00000170027	YWHAG	68.7839	68.3601	38.494	32.6913	67.7306	40.4058	30.0553	58.968	30.8506	38.2209	55.6164	31.0803	28.4193	60.478	31.8145	37.9394	52.4661	29.1057	28.7463
ENSG00000171777	RASGRP4	0.168664	0.18997	0.115869	0.203108	0.112501	0.207238	0.190134	0.298812	0.268645	0.171192	0.176728	0.208805	0.289483	0.222279	0.251669	0.149764	0.235934	0.394779	0.269753
ENSG00000173080	RXFP4	0.043587	0.037614	0	0.035034	0.198598	0	0	0	0	0	0	0	0	0	0.003911	0.170219	0	0.036051	0.02571
ENSG00000171773	NXNL1	0	0	0	0	0	0	0	0	0	0	0	0	0	0	0	0	0	0	0.049078
ENSG00000171772	SYCE1	8.96756	8.93999	12.8852	8.81095	9.82182	14.6134	11.0407	12.8136	16.9329	9.3466	12.8693	18.3501	12.7726	12.6647	16.5357	10.3372	14.1466	19.7196	12.7751
ENSG00000175213	ZNF408	7.08958	7.46059	10.2636	9.75605	8.40618	8.47464	8.03569	5.52405	8.68681	12.7237	5.67926	8.33255	13.9142	5.94853	8.51403	12.8144	6.77375	8.6956	12.5413
ENSG00000175215	CTDSP2	32.0994	30.9378	8.52508	5.83957	32.4857	10.7377	5.18357	36.7662	12.4688	21.5077	39.0765	5.9023	12.6561	38.5481	19.6624	22.1007	37.0443	7.77169	8.03643
ENSG00000175216	CKAP5	47.8771	48.21	27.2286	14.9696	49.269	25.6964	15.849	45.0152	20.4411	24.5675	53.3001	22.4229	12.5942	48.472	23.8865	22.8603	54.461	23.5241	15.1597
ENSG00000179546	HTR1D	6.17752	5.04068	3.66005	2.50659	5.44162	3.50318	1.83624	2.76868	1.80141	2.08177	2.74684	1.54597	1.90243	2.43874	1.43621	2.66209	3.29278	1.4234	1.55795
ENSG00000179542	SLITRK4	0.145435	0.386884	0.030938	0.071963	0.155586	0.034347	0.010336	0.535856	0.064632	0.474558	0.73534	0.057207	0.172427	0.238428	0.114473	0.631164	0.45828	0.091237	0.251967
ENSG00000170790	OR10A2	0.058926	0.03322	0	0.046899	0.046773	0.016526	0.010534	0.0094	0	0	0	0.084079	0	0	0.02557	0.004895	0.104583	0	0
ENSG00000170791	CHCHD7	9.84494	7.7583	19.1612	15.8155	9.93779	21.8285	19.3454	10.7348	15.2015	15.2951	12.1859	23.7955	23.103	11.3681	17.2075	15.7795	10.9259	21.7573	21.8562
ENSG00000196693	ZNF33B	7.11252	7.69164	4.02606	1.81044	6.8288	3.16667	1.876	7.06693	3.45798	4.36068	7.8954	2.5421	2.83139	7.37851	4.56941	3.95487	6.50422	2.74534	1.56997
ENSG00000124313	IQSEC2	4.89846	5.54659	3.75735	3.58754	5.47918	3.62759	3.84854	5.28134	4.60804	4.99374	5.86616	3.54756	3.71678	6.02665	4.70525	5.90633	5.63455	3.8077	3.17796
ENSG00000197124	ZNF682	0.761194	0.635779	0.337384	0.181248	0.771254	0.080365	0	0.381732	0.298173	0.549163	0.773524	0.381307	0.588045	0.419257	0.730448	0.328379	0.75374	0.196187	0.129929
ENSG00000197125	OR8B8	0	0	0	0	0	0	0	0	0	0	0	0	0	0	0	0	0	0	0
ENSG00000197122	SRC	11.9792	12.3787	2.79706	3.62227	10.3154	2.77341	2.32234	9.718	3.67738	9.24372	10.5367	2.24446	6.09731	10.5466	5.29288	8.23853	10.8498	2.46995	3.68206
ENSG00000197123	ZNF679	0	0	0	0	0.031431	0	0	0.255489	0.14205	0.320427	0.064057	0	0.08168	0.205123	0.106431	0.592985	0.034905	0.083523	0
ENSG00000197121	PGAP1	2.08057	1.86453	0.568742	0.67162	1.96941	0.529533	0.601021	1.89002	0.934665	2.12306	1.72314	0.650591	0.626882	2.15121	1.43028	2.25136	1.8624	0.543143	0.518352
ENSG00000161835	GRASP	1.09797	1.18582	1.26106	1.44801	1.28152	1.15118	1.52227	2.37726	1.57695	1.95908	2.08577	1.40787	3.11501	2.21914	2.29155	1.88426	2.35638	1.74272	2.03462
Human_newGene_14606	Human_newGene_14606	2.71657	2.96193	1.16313	0.727644	1.9408	1.05751	0.655868	3.36557	2.08915	2.15942	2.08119	0.732962	0.727418	2.38722	1.70857	1.97532	2.15123	1.26104	0.834915
Human_newGene_14607	Human_newGene_14607	0.558304	0.539395	0	0	0.676138	0	0.047968	0.856213	0	0.301024	0.532749	0.099951	0.041182	0.327892	0.40594	0.686503	0.589561	0.036014	0.094135
ENSG00000197128	ZNF772	2.76444	3.26815	0.916662	0.973292	2.08742	1.17368	0.50021	4.20233	1.03232	2.19165	1.9965	0.783508	1.03355	1.9264	2.14685	2.1826	2.00987	1.24433	0.911889
Human_newGene_8066	Human_newGene_8066	1.24153	0.833834	0.784091	2.82943	1.08274	5.28603	1.6278	1.07561	1.05552	5.26166	1.46711	0.773061	1.16148	1.01785	0.87756	0.466938	2.80579	0.892044	0.370644
Human_newGene_8065	Human_newGene_8065	19.9913	11.6241	11.6685	56.8682	20.2097	88.2079	21.5094	28.9228	28.5892	117.685	20.6162	24.9422	48.5703	30.5043	27.1199	19.5133	65.3117	28.3107	21.2728
Human_newGene_8062	Human_newGene_8062	0.789805	0.415755	0.463528	0.35962	0.606647	0.319374	0.129163	0.617819	0.635518	0.562703	0.719666	0.427282	0.298145	0.68472	0.804608	0.630957	0.53743	0.412392	0.308954
ENSG00000006125	AP2B1	55.4387	53.8939	50.497	54.2321	55.1604	50.0395	49.959	56.5538	53.2981	46.1709	57.0607	50.2198	37.7076	57.561	54.8518	47.1737	54.3395	49.9116	42.6288
ENSG00000121898	CPXM2	0	0	0	0	0	0.014685	0	0.036103	0.015868	0	0	0.028967	0	0.014454	0	0.029695	0.03016	0	0
ENSG00000121897	LIAS	4.45772	4.25916	4.27983	3.54608	4.07316	4.18537	1.53033	4.22685	2.55096	2.35697	2.85615	2.72611	2.17226	3.62906	2.42988	3.04127	3.87907	2.08216	2.05006
ENSG00000121895	TMEM156	0	0.048001	0.027325	0.091543	0.07636	0.053945	0.030464	0	0	0.385055	0.051962	0	0.072927	0.05292	0	0.410347	0	0	0
ENSG00000006128	TAC1	0.169981	0.037644	0.101706	0.045339	0.139131	0.157915	0.298601	0	0.144593	0.106478	0	0.288668	0.138828	0	0.141456	0.255392	0.071002	0.141914	0.037472
ENSG00000121892	PDS5A	25.6475	25.6148	12.4745	8.28018	24.7909	13.4989	6.63124	24.6855	11.2113	14.6068	23.8449	9.73886	7.71998	25.1643	13.1765	13.8234	21.8111	11.5927	7.52619
ENSG00000203995	ZYG11A	0.010465	0.007716	0.013742	0.01257	0.024011	0.016296	0	0.012987	0.011603	0.010153	0.015061	0.02451	0.020647	0.016239	0.038473	0.009805	0.024352	0	0.005929
ENSG00000198695	MT-ND6	1352.14	1303.67	419.073	529.141	1299.37	558.6	475.115	1577.52	1151.74	1145.59	1663.87	811.97	1086.13	1738.47	1253.78	1125.54	1544.6	826.492	755.323
ENSG00000198691	ABCA4	0.311182	0.272081	0.19351	0.277814	0.234331	0.312124	0.349889	0.4286	0.257496	0.431547	0.312317	0.282775	0.200058	0.338696	0.392874	0.350978	0.352043	0.321645	0.236649
ENSG00000198690	FAN1	4.46944	5.44428	4.42935	5.57716	4.59325	4.57668	4.25726	6.36715	4.91644	5.20286	5.93515	3.03653	2.94501	7.34341	5.89678	5.56434	4.24464	3.61089	2.89984
ENSG00000198692	EIF1AY	0	0	0	0	0	0	0	0	0	0	0	0	0	0	0	0	0	0	0
Human_newGene_20268	Human_newGene_20268	6.68208	4.1255	1.98594	3.43784	4.414	1.12055	3.29688	5.09063	2.51097	1.70311	6.06034	1.66375	0.789968	5.74466	2.31437	2.15741	4.31032	1.45737	0.9636
ENSG00000072501	SMC1A	46.6711	49.6246	26.8193	28.9018	46.9904	27.2246	24.4111	60.0579	31.0272	29.2082	47.7581	30.5545	21.4501	47.3151	32.3757	33.6696	62.5926	29.2581	25.2004
ENSG00000176746	MAGEB6	0.214638	0.071792	0.324727	0.201757	0.211178	0.37035	0.30316	0.18381	0.605216	0.35488	0.336961	0.4996	0.335117	0.262609	0.360044	0.504665	0.254268	0.417442	0.263621
Human_newGene_28285	Human_newGene_28285	0.714044	1.07343	0.259254	0.341543	0.91478	0.494543	0.214974	0.498769	0.950614	0.552631	0.380377	1.02114	0.307387	0.803579	1.05291	0.858121	0.706426	1.06001	0.676063
ENSG00000176742	OR51V1	0	0	0	0	0	0	0	0	0	0	0	0	0	0	0	0	0	0	0
ENSG00000284895	AC119676.1	9e-05	5.7e-05	0.101056	0.136519	6.5e-05	0.00302	0	4.7e-05	0.185103	0.000151	0.000258	0.000264	0.000702	0.000155	0.142515	0.000119	9.8e-05	0.157218	0.085923
ENSG00000176749	CDK5R1	2.62562	2.29115	0.768629	1.56986	2.37182	1.43686	1.15997	2.57683	1.46132	2.79147	1.96895	0.893143	2.46987	3.0795	1.42145	2.82006	1.99934	0.764435	1.72335
ENSG00000163382	NAXE	47.4588	44.188	112.433	89.5874	45.698	78.2521	123.847	56.8495	91.6261	86.9027	68.7314	90.5154	110.876	68.8318	81.4419	90.0005	70.997	98.0846	95.3403
ENSG00000176290	OR4K3	0	0	0	0	0	0	0	0	0	0	0	0	0	0	0	0	0	0	0
ENSG00000176293	ZNF135	0.939796	1.03253	0.972703	0.162517	1.49907	1.02952	0.520748	1.96629	0.773139	0.481915	1.35673	0.849994	0.820796	0.730774	1.65106	0.966579	1.05331	0.735697	0.554688
ENSG00000176294	OR4N2	0	0	0.083926	0.030398	0.043531	0	0	0	0	0	0	0.007727	0	0.05467	0	0	0.027015	0	0
ENSG00000176299	OR4M1	0	0	0	0	0	0	0	0	0	0	0	0	0	0	0	0	0	0	0
ENSG00000204501	PRAMEF15	0.085898	0	0	0	0	0.041977	0	0.116602	0.045357	0.055696	0.026956	0	0	0.024334	0	0.028294	0	0	0
ENSG00000204505	PRAMEF9	0	0.024952	0	0.030153	0.033618	0.01727	0	0.027563	0	0	0	0	0	0	0	0.042486	0	0	0.037381
ENSG00000178795	GDPD4	0.082543	0.031674	0	0.018336	0.042151	0	0	0	0.022264	0	0.011614	0	0	0.076035	0	0	0.017955	0	0
Human_newGene_8682	Human_newGene_8682	0	0	0.641666	0	0	0	0	0	0	0.10605	0.109412	0.124937	0	0	0.121774	0	0	0	0.112688
Human_newGene_8684	Human_newGene_8684	0.250992	0.243567	0.069558	0.278199	0.375027	0.098021	0.176271	0.536507	0.236316	1.20848	0.731716	0.097131	1.26237	0.604578	0.429974	1.57601	1.12339	0.314709	0.642909
Human_newGene_8688	Human_newGene_8688	0.068676	0.059264	0.033592	0.071378	0.14081	0.032827	0	0.130493	0.197055	0.251087	0.573101	0.127323	0.064736	0.413839	0.254786	0.432244	0.384812	0.085203	0.038339
Human_newGene_30359	Human_newGene_30359	0.714367	0.626111	0.08716	0.339858	0.567702	0.130334	0.380006	0.438387	0.340449	0.513274	0.447958	0.263894	0.07175	0.413417	0.5453	0.575901	0.436137	0.276699	0.337912
Human_newGene_4221	Human_newGene_4221	4.49098	4.36518	3.05687	4.1998	4.54621	3.31415	2.59249	4.77846	2.4891	3.86142	3.80016	2.81259	2.82847	5.42308	2.75772	4.48268	4.59874	2.92164	2.11227
ENSG00000151892	GFRA1	0.068459	0.106261	0.069425	0.030436	0.077349	0.050931	0.050657	0.139293	0.167765	0.084384	0.153601	0.142698	0.060736	0.181311	0.103126	0.074227	0.163482	0.103543	0.090671
ENSG00000092621	PHGDH	101.089	81.6909	142.397	143.961	87.0505	150.503	150.188	99.1582	144.128	103.051	104.923	125.825	144.407	100.098	127.011	105.704	107.523	141.064	153.087
Human_newGene_7552	Human_newGene_7552	31.6069	34.4537	16.5813	15.9343	32.5117	14.6268	12.0417	29.5169	16.2458	21.8651	25.9907	12.5069	14.6383	29.5202	19.5355	19.5346	29.7381	15.6206	12.9831
ENSG00000268916	CSAG3	9.84493	9.00593	24.1153	15.3984	17.9418	27.1189	15.8223	15.4829	16.4511	28.697	12.5992	34.3945	37.8357	14.9725	23.6402	27.6414	15.6662	25.5899	32.7088
Human_newGene_7550	Human_newGene_7550	0.451753	0.889873	0.450595	0.370521	0.757499	0.264056	0.29208	0.807864	0.466511	0.458434	0.708345	0.430562	0.248368	0.845122	0.594872	0.538834	0.71731	0.455293	0.28199
Human_newGene_7557	Human_newGene_7557	0.475385	0	0.022681	0	0.339024	0	0.38769	0.05892	0	0.015656	0.015854	0.028623	0.18262	0	0.244308	0.69847	0.037373	0.022982	0
Human_newGene_7554	Human_newGene_7554	4.81399	5.60106	0.769584	2.73273	4.7095	0.715783	0.93181	5.07598	2.01117	2.76106	4.46981	1.1328	1.05858	4.78436	2.36206	2.57583	5.07708	1.33933	1.02213
Human_newGene_7559	Human_newGene_7559	0.357345	0.305352	0.165073	0.244647	0.513322	0.14488	0.142567	0.241296	0.194639	0.380708	0.40791	0.202424	0.605606	0.656504	0.319328	0.56365	0.385818	0.175538	0.260518
Human_newGene_7558	Human_newGene_7558	33.8585	28.8055	29.3106	12.0854	42.6058	13.2457	11.457	29.3461	15.8035	22.8642	28.1906	11.0146	11.3576	32.7521	16.2956	13.3973	30.4936	11.3842	7.75993
ENSG00000139645	ANKRD52	31.6282	31.0563	9.10465	7.44334	31.0385	10.2405	5.96196	23.7282	9.38192	15.4148	23.7513	6.43492	7.01699	23.8286	11.82	15.468	22.9874	6.49683	5.52299
ENSG00000136383	ALPK3	0.098966	0.158068	0.058102	0.043669	0.094209	0.095074	0.05369	0.3232	0.302988	0.115416	0.223881	0.192651	0.100009	0.219265	0.224038	0.094157	0.32713	0.122271	0.118425
ENSG00000136381	IREB2	16.0322	15.8871	2.06572	3.27717	13.7244	3.22481	2.73429	13.5196	3.08667	7.91452	12.0426	2.71962	5.08153	12.722	5.61936	7.68279	11.6482	2.8246	3.28189
Human_newGene_2108	Human_newGene_2108	0	0	0	0	0	0	0.384531	0.293949	0	0.453791	0	0	0	0	0	0	0.18259	0	0
ENSG00000132801	ZSWIM3	0.953356	0.78946	0.304503	0.262879	0.549478	0.499144	0.223883	0.758724	0.457168	0.807085	0.942002	0.434613	0.846914	0.988823	0.676425	0.696213	0.837579	0.297912	0.473985
Human_newGene_2106	Human_newGene_2106	0.247686	0.22971	0.007353	0.016803	0.547312	0.046695	0.01634	0.653263	0.03685	0.081221	0.552094	0.007158	0.007038	1.09516	0.049883	0.044811	0.741266	0.032198	0.028277
Human_newGene_2105	Human_newGene_2105	1.3392	1.58444	0.587987	0.242006	1.5996	0.591691	0.486831	2.71414	0.636493	0.679151	3.75072	0.850861	0.725135	1.90682	0.680401	0.689502	4.0469	0.816889	0.32835
ENSG00000165169	DYNLT3	8.83148	7.62626	11.5134	12.5587	7.80141	10.9202	13.4887	9.26633	12.0281	13.7099	9.88213	13.3204	14.0647	10.6378	13.1091	13.6285	9.03419	12.5151	13.9868
ENSG00000141579	ZNF750	0.12682	0.084066	0.054406	0.178825	0.060117	0.103924	0.210914	0.041489	0.089926	0.080311	0.019387	0.19199	0.106549	0.013835	0.108751	0.066714	0.01483	0.051652	0.070905
ENSG00000141576	RNF157	1.78576	2.25297	1.97271	2.04257	2.05996	2.08676	1.50723	5.15311	3.85264	2.52049	4.6804	3.41907	2.4164	4.0362	3.71156	2.16584	3.7525	2.99006	2.37351
ENSG00000141577	CEP131	20.3518	21.1022	21.1586	21.2031	20.8782	20.6775	22.7629	21.6139	16.3693	17.4584	21.589	15.5564	18.1144	21.6085	14.2854	19.3861	22.766	17.8051	21.9066
ENSG00000141574	SECTM1	0.078731	0.131519	0.140049	0	0.155727	0.081732	0.065111	0.173698	0.100332	0.246626	0.273178	0.142533	0.045134	0.012783	0.192713	0.111278	0.154218	0.073375	0.10934
ENSG00000165168	CYBB	0.048831	0.031461	0.042798	0.012991	0.005467	0.01207	0.027357	0.047462	0.039126	0	0.011316	0	0	0.01188	0.034809	0.006102	0.038203	0.010338	0
ENSG00000141570	CBX8	2.44465	2.59674	1.5219	1.25347	3.21145	1.66282	1.0536	3.36618	2.69279	3.89071	3.1732	1.83103	3.50405	3.3284	3.57553	3.94229	3.36176	2.07808	2.12063
ENSG00000172538	FAM170B	0	0	0	0	0	0	0	0	0	0	0	0	0	0	0	0	0	0	0
ENSG00000172530	BANP	6.10149	4.81773	3.71435	2.99225	4.37163	3.53623	2.28582	4.3062	2.46996	2.98651	4.71436	2.41432	2.92126	4.36328	2.46577	3.46297	5.38558	2.50981	2.12689
ENSG00000172531	PPP1CA	117.997	118.104	229.111	233.932	123.458	232.977	241.103	114.375	203.692	147.232	110.202	200.064	180.462	117.999	176.762	138.01	105.227	200.416	174.261
ENSG00000172534	HCFC1	45.166	38.1283	15.1782	12.8656	35.9977	15.3779	12.2778	32.8152	18.0406	22.3961	31.6337	12.3861	9.38083	24.5817	12.1011	19.6369	34.8763	13.2244	13.1158
ENSG00000173662	TAS1R1	0	0.008094	0	0	0.048564	0	0	0	0.0195	0	0.017383	0	0.05285	0	0	0.018246	0.013113	0.0198	0
Human_newGene_19736	Human_newGene_19736	0.064298	0.321696	0.321254	0.718319	0.494845	0.381613	0.298237	0.115576	0.208959	0.049731	0.165578	0.170008	0	0.087069	0.179786	0.156747	0.095101	0.1752	0.183262
ENSG00000147804	SLC39A4	3.45258	2.76615	6.88091	5.7461	3.54101	5.97358	9.26868	4.93327	5.65351	3.44094	3.92881	5.30215	5.09418	4.45276	3.89689	4.59553	4.44687	6.42661	6.02778
Human_newGene_13159	Human_newGene_13159	4.24907	2.64988	3.29931	2.21126	4.33358	2.20052	2.45997	3.56523	2.11251	2.66955	3.51356	1.26162	1.78516	3.7338	2.86686	3.83754	3.19378	1.50477	1.59461
ENSG00000162910	MRPL55	13.9012	11.474	13.9878	9.73199	9.9495	13.3698	6.77586	10.6768	12.5454	8.00555	13.8987	11.9734	9.65524	12.0149	11.6894	8.71903	12.4919	11.3733	9.25903
ENSG00000122203	KIAA1191	12.72	18.0758	16.9357	10.5374	18.6943	9.86848	19.2714	23.9098	19.5501	19.1531	11.4186	24.0205	20.8113	16.7043	19.6446	11.2852	19.9289	12.7315	9.77951
ENSG00000113303	BTNL8	0.024248	0.049371	0	0.024782	0.09172	0.045685	0.062372	0.023037	0	0.109031	0	0	0.02179	0	0	0.023673	0	0	0
ENSG00000113300	CNOT6	7.83276	7.44961	1.29372	1.56717	8.6881	1.63177	1.3042	7.94409	2.22579	4.97584	8.47713	1.3361	1.77869	9.36491	3.72595	4.28883	7.47838	1.12132	1.44626
ENSG00000073282	TP63	0	0.018971	0	0	0.010033	0	0	0.051813	0	0	0.112445	0	0	0.109879	0.02044	0.053531	0.093701	0.034069	0
ENSG00000106443	PHF14	22.829	21.9808	16.1741	11.2	22.2394	13.7888	9.16743	20.296	9.04324	11.1558	19.3679	9.4786	7.00736	20.5517	11.2511	10.9558	20.4194	10.5887	7.50413
Human_newGene_24145	Human_newGene_24145	0.144127	0	0	0	0	0.551145	0	0	0	0	0	0.226029	0	0	0	0.084898	0	0.178812	0
ENSG00000089737	DDX24	22.2156	16.0004	14.2861	10.9587	17.2057	14.8396	9.0684	18.2371	10.8138	17.279	16.762	12.9424	13.3655	17.043	12.1594	18.4596	16.5908	14.7022	11.2353
Human_newGene_49456	Human_newGene_49456	0.583936	0.323098	0.282275	0.190431	0.221161	0	0	0	0.530725	0.30341	0.093317	0.438855	0.463505	0.02618	0.234662	0.552379	0.350666	0.43059	0.252343
Human_newGene_17721	Human_newGene_17721	0.063615	0.364222	0	0.448277	0	0	0	0.21849	0	0.082728	0	0	0	0.114018	0	0	0.463512	0	0
Human_newGene_17723	Human_newGene_17723	0	0.217554	0	0	0.081951	0.02721	0.098411	0	0	0.206577	0	0	0.833577	0	0.135515	0.422903	0	0.074381	0.249261
Human_newGene_6680	Human_newGene_6680	0.607782	0	0	0	0	0	0	0	0	0	0	0	0	0	0	0	0	0	0
ENSG00000070886	EPHA8	0.433848	0.139073	0.904369	0.259907	0.113279	0.426664	0.546565	1.08715	2.75286	1.71207	1.54566	2.32772	1.81548	2.02247	1.70321	1.43421	1.27176	2.34529	2.65326
ENSG00000070882	OSBPL3	5.89222	7.29793	5.00118	3.23959	6.28581	4.28835	3.94207	7.73722	4.03802	6.29932	8.91045	4.69674	2.7713	7.58779	4.87752	5.62947	7.11043	4.36062	3.26886
Human_newGene_35444	Human_newGene_35444	0	0	0.12777	0	0	0.520616	0	0	0	0	0	0	0.133485	0.024767	0.026565	0	0	0.269221	0
ENSG00000270249	AC093668.1	0.283522	0	0	0	0.023248	0.116528	0	0	0	0	0	0	0	0.025129	0	0.702167	0	0	0
ENSG00000224578	HNRNPA1P48	7.0576	6.9617	4.87916	4.0758	4.97483	6.01328	5.02672	10.5276	11.2711	6.30132	10.4768	11.1175	6.51446	10.4263	10.2955	6.70099	12.4443	9.41174	6.55417
ENSG00000080561	MID2	0.971196	1.21473	0.733121	0.399435	0.797182	0.473972	0.624368	1.08946	1.02059	1.16445	1.31924	0.23828	1.1594	1.14365	0.67564	0.851205	0.939484	0.528016	0.778867
ENSG00000137522	RNF121	10.4475	10.0662	8.31237	3.87881	7.89096	6.51202	3.40002	11.8175	3.65371	8.94017	7.96712	5.11944	3.29629	9.65224	5.83039	5.43134	10.8493	5.2091	4.60801
ENSG00000163993	S100P	0	0.109279	0.160949	0.087842	0	0.177509	0.184973	0.350758	0.569667	0.308871	0.44534	0.6171	0.51611	0.534461	0.862727	0.123771	0.387465	0.6607	0.646983
ENSG00000145982	FARS2	5.5814	3.68802	3.93589	2.19488	3.98799	4.68314	2.29095	3.83381	2.94436	2.09888	3.6865	2.85704	1.59575	4.50898	2.42363	1.86898	3.31834	2.63361	1.55505
ENSG00000175336	APOF	0	0	0	0.060462	0.02106	0	0	0	0.022626	0.078851	0.015508	0	0.117435	0	0	0	0	0	0.054143
ENSG00000110651	CD81	33.8939	32.7909	55.3777	49.6208	30.9672	53.077	60.4148	38.9495	48.4545	49.2451	39.9727	58.1697	65.2221	35.2448	52.4147	59.7358	40.2089	47.4399	69.313
ENSG00000144057	ST6GAL2	0.022288	0.113862	0.043679	0	0.074448	0.032284	0	0.073841	0.061962	0.010199	0.092184	0	0	0.028245	0.049261	0.06965	0.064335	0.099157	0.012764
ENSG00000275740	AC091959.3	1.03061	0.88504	0.31844	0.351614	0.602579	0.2065	0.13706	0.636579	0.149439	0.272587	0.659836	0.237929	0.152974	0.894594	0.322291	0.531173	0.681441	0.113746	0.278603
Human_newGene_18129	Human_newGene_18129	0	0.044209	0	0	0.046685	0.591671	0.33637	0.048672	0.133634	0.078025	0	0.390326	0.081031	0	0.070858	0.100034	0.034307	0.21158	0.163704
Human_newGene_18126	Human_newGene_18126	0	0.019858	0.209123	0.207863	0.014669	0.476451	0.282933	0	0.210664	0.073156	0	0.214332	0.280709	0	0.184593	0.10657	0.021547	0.427433	0.299763
ENSG00000117153	KLHL12	11.9906	12.3143	5.37764	4.70563	11.4943	5.44385	3.68997	15.8227	5.62197	6.84159	15.2593	5.57232	5.87118	14.3807	6.5534	6.66177	13.3276	5.23509	4.90115
ENSG00000117152	RGS4	0.610791	0.349516	0.267054	0.629685	0.522009	0.126052	0.390481	0.416597	0.170208	0.595296	0.325991	0.191312	0.492688	0.365054	0.140792	0.613536	0.505232	0.450561	0.403435
ENSG00000117151	CTBS	1.77972	1.37249	3.08953	2.91658	1.456	1.82121	1.50747	3.43482	2.80656	2.06111	3.66321	2.3617	2.80997	2.93825	1.91906	2.33391	2.52631	1.93049	2.00742
Human_newGene_23993	Human_newGene_23993	0.137726	0.083253	0.373379	0.620916	0.172083	0.585059	0.497417	0.103735	0.949883	0.655738	0.347047	1.0662	1.22988	0.270849	0.968934	0.752084	0.140313	0.785354	0.350762
ENSG00000117155	SSX2IP	9.38443	9.78797	6.38358	4.18786	9.90617	7.53737	4.52703	9.98589	6.53522	6.57642	9.0252	6.27848	3.86322	10.4258	7.79942	5.61446	9.76964	6.18931	3.78657
ENSG00000117154	IGSF21	0	0	0	0	0	0.026861	0	0	0.058048	0	0	0	0.20198	0	0.064554	0	0	0.092029	0.023815
Human_newGene_42544	Human_newGene_42544	0.120409	0.42248	0.154678	0.318587	0.317199	0.100228	0.078029	0.43276	0.211501	0.35746	0.632594	0.321838	0.197564	0.294198	0.360519	0.264045	0.510496	0.194114	0.18484
ENSG00000171984	SHLD1	0.809583	0.901096	0.559585	0.413766	0.668223	0.784629	1.23874	0.948009	0.515762	1.41744	1.30985	0.709576	1.12731	1.81419	1.69019	1.40801	0.472696	1.45461	0.888185
ENSG00000171987	C11orf40	0	0	0	0	0	0	0	0	0	0	0	0	0	0	0	0	0	0	0
ENSG00000171988	JMJD1C	13.6504	13.9051	1.92984	2.3892	14.0887	2.24229	1.94457	16.6567	2.99733	6.04771	20.2942	2.34947	3.47675	16.4203	4.4129	6.53821	19.7986	2.83386	2.23367
ENSG00000171989	LDHAL6B	0.031924	0.013775	0	0.132059	0	0.030828	0.034935	0.03033	0.03331	0.029216	0.066318	0.043478	0.090278	0	0.074086	0.062336	0.130096	0.055185	0.137116
ENSG00000103319	EEF2K	2.36522	2.67257	0.85727	0.594574	2.4889	0.713872	1.16054	2.36926	0.924732	1.31795	2.45196	0.644629	0.622162	2.35749	1.10517	1.38073	2.44207	0.751319	0.560559
ENSG00000103310	ZP2	0	0	0	0	0.008958	0	0	0.011732	0	0	0	0	0	0	0.012217	0	0	0	0
ENSG00000103313	MEFV	0.116545	0.050287	0	0	0.036341	0	0	0.168536	0.045751	0.139089	0.247029	0.109439	0.532475	0.168698	0.06209	0.274543	0.21923	0.039953	0.079983
ENSG00000103316	CRYM	1.61567	1.21907	2.56938	2.84093	2.55301	1.57868	3.31341	3.85653	6.72415	5.16648	3.60775	4.35364	4.2402	4.54058	5.02917	4.5531	5.81252	5.22956	5.94365
ENSG00000083812	ZNF324	3.05487	3.49374	1.03239	0.166811	3.44159	0.959914	0.725532	3.12136	1.12839	1.61284	2.42208	1.01405	1.70566	2.88335	1.96748	2.43044	2.91576	1.26724	1.40909
ENSG00000083814	ZNF671	2.27675	1.8986	0.86668	1.2389	1.93614	1.44265	0.789618	1.77697	1.13289	1.74037	2.92695	1.13841	1.17314	2.16942	2.18356	1.64648	2.38979	0.938651	0.698192
ENSG00000083817	ZNF416	1.41138	1.45584	0.935932	0.657165	1.45026	1.42364	0.672855	1.82348	1.11312	1.14983	1.38916	1.0928	1.17262	1.59602	1.41283	1.14471	1.64429	1.08397	0.834098
ENSG00000102048	ASB9	0.442598	0.28485	0.568134	0.651964	0.489202	0.496154	0.610062	0.314079	0.518841	0.252479	0.379334	0.538826	0.420513	0.683134	0.428898	0.340939	0.578731	0.717424	0.420061
ENSG00000269881	AC004754.1	0.02491	0.048744	0.086219	0	0.00593	0	0.106063	0.006818	0.082837	0.067101	0	0.048938	0.043622	0.020416	0.0701	0.019315	0.062352	0.049654	0.089183
Human_newGene_35521	Human_newGene_35521	0.581756	0.405206	0.201609	0.177593	0.701056	0.14734	0	0.806495	0.186105	0.294071	0.642396	0.13357	0.371488	0.748757	0.434167	0.755092	0.388138	0.290117	0.068403
ENSG00000175155	YPEL2	1.05502	1.66711	0.317219	0.470331	1.82744	0.525052	0.419331	2.07732	1.49979	2.68853	2.1905	0.535923	2.65344	2.47181	2.52525	3.05334	2.79542	0.776056	1.07355
ENSG00000139351	SYCP3	0	0.02792	0	0.046602	0.045441	0	0	0.019934	0	0.044164	0	0	0	0	0	0.047114	0	0	0.041453
ENSG00000139350	NEDD1	13.8725	11.6308	7.39783	5.39829	9.91808	7.50081	4.97074	14.6847	8.20971	7.41082	14.1468	6.415	4.87688	14.9802	8.3735	8.63905	12.3913	7.94883	5.04152
ENSG00000139352	ASCL1	0.274822	0.41226	0.252105	0.095656	0.426575	0.187692	0.125769	0.497911	0.107101	0.360503	0.370673	0.22101	0.203486	0.474155	0.209317	0.214387	0.466952	0.264735	0.222477
ENSG00000139354	GAS2L3	10.9068	11.3403	3.72165	2.74834	10.3652	5.37958	2.36404	8.72435	2.67428	5.18583	17.1516	6.59221	1.72166	9.76994	2.82273	4.16923	13.4609	4.95932	2.35902
ENSG00000131165	CHMP1A	42.6162	43.9108	29.878	16.176	40.6197	28.4343	14.3589	36.382	17.12	25.4843	36.9012	19.7243	24.5584	37.2134	19.0738	27.722	36.2431	19.0047	19.0126
ENSG00000064607	SUGP2	18.4532	22.8954	13.106	10.4026	19.1406	11.24	9.83286	16.8591	12.4399	17.6901	19.7439	11.5738	8.70885	16.2196	11.5383	13.4707	25.1588	10.6953	8.40142
ENSG00000064601	CTSA	50.574	51.1102	79.7087	96.2286	50.3599	77.3206	102.94	50.2373	86.3024	82.7164	52.1255	82.47	97.9563	52.6633	84.1511	82.3786	56.6301	84.995	100.283
ENSG00000143919	CAMKMT	4.36286	3.72984	5.25521	5.63407	4.29429	4.16771	3.66881	3.41779	2.48627	2.17767	3.11958	3.1067	2.56964	3.1408	3.14994	3.95916	3.10541	3.88013	1.96179
ENSG00000102595	UGGT2	2.43509	1.64242	1.70896	2.76337	1.98918	1.94343	2.65933	3.36783	2.68142	2.70176	2.87906	3.73096	2.11732	2.96923	2.77668	3.21259	2.64919	2.6138	2.74694
Human_newGene_24771	Human_newGene_24771	0.078406	0.269742	0	0.108655	0.168599	0	0	0.607349	0.369867	0.185709	0.668115	0.298607	0.061447	0.616798	0.593011	0.119406	0.574408	0.332542	0.153582
Human_newGene_24770	Human_newGene_24770	0.08579	0.351658	0.57759	1.68969	0	2.23825	1.64399	0.359163	1.37272	0.890649	0.382146	0.721491	0.741486	0.163082	0.830053	1.82912	0.24563	1.49115	1.11622
ENSG00000111218	PRMT8	0	0.019187	0	0	0.020747	0	0	0.023448	0	0	0.021248	0	0	0.03298	0	0	0.069818	0	0
Human_newGene_24779	Human_newGene_24779	0.210371	0.226876	0	0.136474	0.159299	0.050787	0.172339	0.264379	0.156334	0.599934	0.357763	0.083481	1.21306	0.305037	0.224735	0.55957	0.173125	0.036153	0.285982
ENSG00000180745	CLRN3	0	0	0	0	0	0	0	0	0	0	0	0	0	0	0	0	0	0	0
ENSG00000111215	PRR4	0.045615	0.062133	0.196176	0.019956	0.170218	0.947006	0.234573	0.369281	0.067849	0.427424	0.0506	0.512623	0	0.045305	1.42785	0.45567	0	0.340182	0.34953
ENSG00000142065	ZFP14	0.775414	1.00263	0.081459	0.248554	0.518364	0.278207	0.182724	1.25233	0.599801	0.472784	1.03711	0.461618	0.641281	1.01679	1.09864	0.419455	1.00511	0.241434	0.061994
ENSG00000188517	COL25A1	0	0	0	0	0	0.063543	0	0.019044	0	0	0	0.01925	0.012696	0.006401	0.012294	0	0	0.00557	0
ENSG00000183684	ALYREF	142.758	141.425	186.985	141.108	135.91	186.811	153.782	135.059	171.098	114.137	131.922	172.592	129.95	130.398	148.311	108.013	137.067	167.567	130.541
Human_newGene_34433	Human_newGene_34433	0	0.238167	0	0	0.21275	0.267847	0	0	0	0.518398	0.219912	0	0.140925	0	0	0	0.069342	0	0
Human_newGene_33802	Human_newGene_33802	0.322386	0.168353	0.787564	0.578735	0.158231	0.740299	1.07993	0.061966	0.443903	0.512851	0.101112	0.443887	0.586647	0.129617	0.598914	0.471463	0.120935	0.39629	0.985227
ENSG00000109610	SOD3	0	0.024555	0.068245	0	0.032168	0	0	0.067299	0.115564	0.032414	0	0	0.033164	0.018515	0	0.068552	0	0	0.030424
ENSG00000109618	SEPSECS	1.2876	1.3574	2.54523	1.3663	2.0854	2.93943	1.76181	1.94001	1.80379	2.15843	1.68483	1.56091	1.42143	2.05264	1.56738	1.90598	1.93338	1.71872	1.78238
ENSG00000118271	TTR	0	0	0	0	0	0.050184	0	0	0	0	0	0	0	0	0	0	0	0	0
ENSG00000183421	RIPK4	0.013144	0.007072	0	0.020749	0.036792	0	0	0.084595	0.028084	0.141241	0.170901	0.10194	0.114174	0.140069	0.049888	0.078287	0.235213	0.022262	0.045681
ENSG00000118276	B4GALT6	1.99504	2.1078	0.885298	1.40261	1.48031	1.38068	1.25361	1.98838	1.11395	1.90986	1.8805	0.699419	1.34588	2.90138	1.2201	2.26854	1.58057	0.738035	1.12913
ENSG00000149328	GLB1L2	0.016062	0.05473	0.061326	0.066163	0.013021	0.074995	0	0.122188	0.132734	0.22664	0.052597	0.134868	0.163503	0.091248	0.170749	0.175237	0.048428	0.107862	0.150964
ENSG00000141744	PNMT	0	0	0	0	0	0.041653	0	0	0	0	0	0	0.082847	0.075121	0	0	0	0	0.111159
ENSG00000219626	FAM228B	0.601355	0.354987	0.085134	0.113473	0.447545	0.50779	0.378602	0.249751	0.398312	0.566944	0.460201	0.128057	0.443944	0.368438	0.495209	0.348221	0.374079	0.413458	0.221129
ENSG00000137821	LRRC49	5.97992	6.10115	7.01634	4.89638	6.32605	5.79992	4.17814	7.68506	4.89088	4.54884	7.52223	5.48849	3.44983	9.19136	5.27155	5.13045	7.45906	5.23302	3.35049
ENSG00000214456	PLIN5	0.321812	0.334178	0.56006	0.28159	0.23938	0.382278	0.225549	0.548789	0.985131	0.840427	1.01183	0.820682	0.820607	1.24595	0.592373	0.677487	0.88958	0.532057	0.322954
ENSG00000105063	PPP6R1	34.1465	33.1134	36.441	38.6554	34.2142	36.1952	37.7281	22.0978	21.2598	22.0853	23.7162	21.4556	19.2766	23.2497	19.6042	21.7098	25.0246	21.9766	21.5349
ENSG00000070413	DGCR2	17.0975	17.2747	4.99427	3.58565	7.54276	4.80056	3.30188	13.8379	6.79592	10.0005	13.796	3.5998	5.85075	13.8694	7.64233	10.5205	13.7872	3.95555	4.00689
ENSG00000152910	CNTNAP4	0.043356	0.127959	0.103204	0.011542	0.203724	0.015746	0.120399	0.088611	0.023135	0.029981	0.154951	0.152118	0.057573	0.142738	0.171342	0.021142	0.205823	0.059151	0.051989
ENSG00000175482	POLD4	9.18346	7.90143	10.6697	6.69132	10.1499	11.0174	8.05865	9.04786	10.777	8.12651	10.005	9.03502	13.2116	9.36183	10.2088	14.2441	9.74986	15.2004	7.26047
ENSG00000146360	GPR6	0	0	0	0	0	0	0	0	0	0	0	0	0	0	0	0.02713	0	0	0
ENSG00000187513	GJA4	0.099965	0.114254	0.052482	0.08462	0.040565	0.015767	0	0.035522	0	0.128995	0.030994	0	0.03141	0	0	0.091061	0	0.042212	0.003721
ENSG00000133477	FAM83F	0.003473	0	0.003398	0	0.015651	0	0	0	0.007224	0	0.003231	0	0.009509	0.003279	0	0	0	0.008609	0
ENSG00000133475	GGT2	0	0	0.044694	0	0	0.025859	0	0	0	0	0.072314	0.021756	0	0	0.098368	0.008571	0	0.078095	0.060591
ENSG00000164512	ANKRD55	0.082449	0.054345	0.040166	0	0.086709	0.03289	0.022144	0.020892	0	0.043762	0.033416	0	0	0.025155	0.01543	0.075517	0.021426	0.013659	0
ENSG00000172273	HINFP	3.17755	2.47857	2.31976	2.38758	2.51971	3.12342	2.1369	1.81966	2.03367	2.52383	1.91131	1.51374	2.16658	2.36258	2.43844	2.25239	2.30592	1.67856	2.18838
ENSG00000172270	BSG	193.273	245.21	433.457	687.9	230.439	380.326	493.625	210.916	360.25	426.912	217.731	370.483	535.523	208.675	274.328	444.524	215.377	305.439	519.556
ENSG00000118898	PPL	0.431649	0.469612	0.269628	0.179391	0.310113	0.422174	0.216379	0.808759	0.615196	0.453056	0.776573	0.550102	0.251249	0.536379	0.640229	0.442657	0.714841	0.477036	0.34509
ENSG00000118894	EEF2KMT	10.4103	10.5593	9.14009	5.35813	10.1598	8.67141	4.78806	8.08417	6.4307	8.02495	8.10459	6.13607	7.25131	7.79869	7.32205	6.85609	7.69213	5.47592	4.89442
ENSG00000186377	CYP4X1	0	0	0.022432	0	0.020896	0	0	0.04241	0.041099	0.081622	0.042587	0.043678	0.021183	0	0.044842	0.015061	0.012945	0.056898	0
ENSG00000186376	ZNF75D	0.494365	0.435137	0.122361	0.197511	0.558866	0.259926	0.108909	0.455145	0.240083	0.410235	0.629912	0.169107	0.385872	0.515833	0.443081	0.432212	0.619863	0.256364	0.19067
ENSG00000166819	PLIN1	0.090293	0.107516	0.089405	0	0.084547	0.035348	0.090763	0.051682	0.186487	0.100445	0.085008	0.13881	0.147913	0.091678	0.157326	0.089286	0.04556	0.120954	0.138826
ENSG00000115446	UNC50	21.7977	19.7046	12.0228	10.8472	20.4835	13.8568	8.75412	19.5938	16.023	19.1024	21.6187	14.7416	16.0358	20.8577	17.6124	17.5187	18.0756	13.8924	13.0411
ENSG00000166813	KIF7	16.9517	17.9755	10.1163	6.22383	16.1536	8.81804	4.84026	15.9566	9.68302	12.7823	15.0624	7.14589	11.9377	16.1616	10.2801	11.8747	15.0517	7.5561	7.34218
ENSG00000113845	TIMMDC1	17.2928	19.3501	24.8627	25.2697	18.3478	23.2554	29.4181	12.3799	16.3435	13.1139	18.7604	19.1371	18.7533	17.1144	16.7315	17.6655	13.5041	18.7858	13.5953
ENSG00000108255	CRYBA1	0	0	0.067527	0.107213	0	0	0.188172	0	0.094887	0	0.037263	0	0	0	0	0.105655	0	0.082727	0
Human_newGene_37272	Human_newGene_37272	0.178375	0.21522	0.058166	0	0.108366	0	0	0	0.346592	0.091263	0.160906	0.453018	0.102006	0.505136	0.220775	0	0.181726	0.196713	0
Human_newGene_34377	Human_newGene_34377	0.207557	0.107468	0.47396	0.531173	0.188763	0.420039	0.138004	0.078877	0.491532	0.353182	0.077224	0.296035	0.474517	0	0.565866	0.452745	0.142496	0.521824	1.21237
ENSG00000104731	KLHDC4	13.9684	13.3566	12.8496	11.3108	14.7156	12.7471	11.8344	11.2661	10.286	11.0116	11.2261	10.5167	9.87999	10.8827	10.4192	8.99234	11.3826	10.764	9.28643
ENSG00000104738	MCM4	111.134	93.4414	72.0001	52.9749	84.18	76.7428	47.0814	111.643	64.2381	47.4304	101.055	57.1198	31.8433	96.2808	78.8323	46.7902	95.4195	57.1316	33.4944
Human_newGene_45383	Human_newGene_45383	0.828694	1.03432	0.642123	0.673948	1.06122	1.88277	0.757368	1.32917	1.16959	0.700656	1.66906	0.761045	0.24906	1.52607	0.820438	0.184662	1.23607	1.08256	0.209658
ENSG00000196455	PIK3R4	9.9146	9.7478	3.90795	3.20008	10.0752	3.90408	2.59087	9.78553	3.35526	5.29293	8.66325	2.71243	2.78748	9.99385	4.08763	5.54791	9.14542	2.58065	2.00983
ENSG00000196456	ZNF775	0.666278	0.667825	0.04412	0.122391	0.578831	0.200334	0.129716	0.614012	0.247778	0.689022	0.879532	0.008785	0.424898	0.557485	0.525573	0.884776	0.691398	0.206099	0.316921
ENSG00000125207	PIWIL1	0.180405	0.067866	0.178669	0.25838	0.095411	0.058085	0.10624	0.29555	0.104096	0.025267	0.377299	0.313437	0.116755	0.181224	0.143092	0.102933	0.130315	0.231234	0.238254
ENSG00000196453	ZNF777	2.77756	2.76225	1.43688	1.43759	3.34559	1.53077	0.885682	2.33494	1.10723	1.5506	2.20277	0.980074	1.22509	2.62917	1.23157	1.33262	2.45306	1.01634	1.05621
ENSG00000196459	TRAPPC2	3.2299	4.18347	1.63625	0.853708	4.31641	0.843796	0.606766	3.56771	1.55607	1.51299	2.7418	1.79164	1.002	3.50798	1.7473	3.04329	2.01363	2.23159	1.1318
ENSG00000196458	ZNF605	3.41361	3.32171	0.818824	0.680413	3.09191	1.17507	0.462455	3.4356	0.977142	1.89392	3.2835	0.624886	0.685517	3.23385	1.48784	2.17402	3.60556	0.634471	0.664416
ENSG00000197324	LRP10	18.2294	17.2039	19.9103	23.562	17.5948	20.0686	21.1777	15.9301	20.3887	23.1766	17.6811	17.9491	23.5573	16.4329	18.7665	23.408	18.1287	18.9837	21.6241
ENSG00000104880	ARHGEF18	15.7297	14.7886	10.4861	11.0675	15.4676	9.09803	8.32838	13.3092	6.69458	13.2344	13.4845	4.45622	9.31608	13.362	7.40381	9.04437	8.61597	7.07786	7.18129
ENSG00000104883	PEX11G	0.653289	0.623227	1.4832	0.977506	1.02489	0.844431	0.267317	0.695935	0.736869	0.287362	0.754091	0.543609	0.573915	0.851828	1.26672	1.31903	0.488711	0.643184	0.296984
ENSG00000124155	PIGT	39.6916	30.1354	53.7065	84.0163	38.8732	52.953	104.917	47.9708	83.2448	72.4079	42.5783	72.0142	104.859	39.1216	69.0281	86.946	42.4511	70.2936	129.966
ENSG00000197321	SVIL	16.0983	17.6453	6.33158	6.08954	17.1048	7.78465	5.37771	10.6838	5.18332	11.5791	9.00766	3.63403	4.21433	12.421	6.80412	12.6388	10.9479	4.16308	3.66674
ENSG00000124157	SEMG2	0	0	0	0	0	0	0	0	0	0	0	0	0	0	0	0	0	0	0
ENSG00000104886	PLEKHJ1	21.3642	26.4003	24.4656	7.53635	39.2045	16.1432	18.4204	16.316	12.4267	10.5985	15.7691	10.9455	8.89666	19.206	12.0982	10.8074	16.941	13.0921	8.08365
ENSG00000124159	MATN4	0.049134	0.273136	0.273958	0.602731	0.217671	0.245684	0.887674	0.042021	0.308672	0.754205	0.182048	0.336824	1.919	0.150377	0.29876	0.842545	0.096647	0.314255	1.13128
ENSG00000104888	SLC17A7	3.56087	3.89556	4.42601	3.92833	2.77815	3.60082	4.147	5.00151	6.77348	5.69885	5.16106	5.46623	6.2188	4.3896	6.20581	6.58103	5.42953	6.58448	5.95001
ENSG00000197329	PELI1	3.48558	4.43448	1.05827	1.62812	3.71122	1.69305	1.60401	5.07648	1.69291	4.02422	5.20957	1.21877	2.82564	5.70997	2.71735	3.86811	5.5007	1.48823	2.34834
ENSG00000169836	TACR3	0.010414	0	0	0	0.028469	0	0.011396	0	0	0	0.009686	0	0	0	0	0	0	0	0
Human_newGene_44475	Human_newGene_44475	0.121808	0.105523	0.239246	0	0.734328	0	0	0.240834	0.418295	0	0	0.116457	0.172513	0	0.111878	0	0.245832	0	0
Human_newGene_44473	Human_newGene_44473	0	0	0	0	0	0	0	0	0	0	0	0.496536	0	0	0.119916	0	0	0	0
ENSG00000283977	AC084337.2	0.120614	0	0.036394	0	0.037593	0	0	0.250915	0	0.181317	0	0	0	0	0	0.111916	0.294037	0	0
ENSG00000140030	GPR65	0.035857	0	0	0	0	0	0	0.011355	0	0	0.016676	0.022766	0.045066	0	0	0.03493	0	0	0.021027
ENSG00000019144	PHLDB1	20.8986	17.398	10.0419	10.6952	15.0717	15.029	14.1957	12.7292	9.65645	11.2677	13.2004	8.45957	8.48204	13.2042	9.13178	11.0001	13.1471	8.85325	10.6667
ENSG00000076513	ANKRD13A	5.97895	5.25226	3.75619	3.42746	5.76105	3.69364	2.1816	6.86783	4.02154	6.52156	6.71518	3.43713	4.67356	8.05398	5.01427	6.68798	5.91915	3.47286	4.40589
ENSG00000185055	EFCAB10	0.039327	0.266878	0.061049	0	0.078453	0.042772	0.026202	0.217929	0	0.149205	0.034769	0	0.036046	0.253153	0.085683	0	0.15756	0	0.017101
ENSG00000185056	C5orf47	0	0	0	0	0	0.020695	0	0	0.044721	0.019613	0	0	0	0	0	0	0	0	0
ENSG00000107282	APBA1	0.332508	0.273577	0.056644	0.008597	0.574652	0.031951	0.054311	0.865031	0.164092	0.178837	0.53097	0.283903	0.070019	1.01594	0.43244	0.261174	0.894041	0.101347	0.017764
ENSG00000185053	SGCZ	0	0	0	0	0	0.021337	0	0	0	0	0	0	0	0	0	0	0.024648	0	0
ENSG00000185052	SLC24A3	0.426069	0.624136	0.375545	0.212631	0.576941	0.49318	0.225099	0.767382	0.357896	0.287092	0.81007	0.278879	0.193251	0.667526	0.190392	0.194254	0.58277	0.25577	0.149651
ENSG00000218823	PAPOLB	0	0	0.037134	0.052766	0.011556	0.036737	0.055509	0.058152	0.052927	0.023211	0.011795	0.012077	0.023908	0.048213	0.011772	0.024762	0.012876	0.041955	0.021787
Human_newGene_33039	Human_newGene_33039	0.702548	0.2365	0.133384	0.064407	0.422447	0.197497	0.09795	0.53217	0.156491	0.344729	0.350455	0.194781	0.184032	0.275376	0.325435	0.276856	0.541296	0.170136	0.092136
ENSG00000152284	TCF7L1	5.80637	6.82238	1.34356	1.31767	5.95299	1.68626	0.879571	7.86054	1.47871	4.32189	7.04939	1.01015	1.82581	8.44453	2.63705	4.21962	7.5442	1.70989	1.53928
Human_newGene_33033	Human_newGene_33033	0.634416	0.256745	0.123371	0.37401	0.250968	0.619935	0.22138	0.38241	0.255925	0.466193	0.344317	0.442734	0.249091	0.336441	0.253407	0.282359	0.282645	0.249183	0.220955
Human_newGene_33034	Human_newGene_33034	0.745624	0.607376	0.088345	0.104026	0.773837	0.149342	0.176152	0.762809	0.027153	0.245202	0.814351	0.061976	0.361769	0.652775	0.008456	0.337054	0.682082	0.091998	0.170252
ENSG00000106771	TMEM245	6.90514	6.02121	5.76212	6.4545	6.87091	6.01568	6.00582	7.6586	6.16043	6.71949	7.43865	5.50467	5.2068	7.96259	6.07602	7.42769	7.29768	5.19345	5.39905
ENSG00000106772	PRUNE2	0.352053	0.508813	0.200714	0.282306	0.479458	0.182827	0.226736	0.556697	0.340597	0.146035	0.511051	0.227307	0.147134	0.738931	0.302963	0.177182	0.469822	0.458929	0.240419
ENSG00000103056	SMPD3	0.557334	0.810859	0.659645	0.87217	0.597417	0.439662	0.590633	0.577697	1.16338	0.714932	0.62585	0.729683	0.599204	0.699233	1.06799	0.758477	0.616785	0.641665	0.648571
ENSG00000151532	VTI1A	6.81698	5.79503	3.30434	3.15142	6.02055	3.23055	2.5605	4.97082	2.42418	2.40807	4.46049	2.57917	1.74031	4.98378	2.81704	2.53001	4.45769	2.68393	1.83634
ENSG00000103051	COG4	12.253	10.9807	14.8651	13.8444	13.5522	15.249	15.0203	11.1946	11.8926	9.53857	12.0649	12.7381	9.75569	11.1568	11.5217	9.0232	11.9676	11.8252	10.8037
ENSG00000076716	GPC4	2.68637	2.69068	1.59039	1.26782	2.87501	1.94951	1.46164	3.99199	3.9344	3.12647	4.72587	3.57628	2.0524	4.6138	3.39809	3.08816	4.54092	3.60071	2.40599
ENSG00000127362	TAS2R3	0.283411	0.03968	0.085481	0.355109	0.351611	0	0.271283	0.165256	0	0	0.045661	0.046752	0.025759	0.060189	0.228147	0.187395	0.050012	0.040602	0.071405
ENSG00000152133	GPATCH11	8.06456	7.07336	2.77659	2.65712	7.72355	3.28359	1.68953	9.01902	3.05188	4.73211	7.91725	2.85114	3.04992	8.94487	4.68169	4.21609	8.13459	2.89044	2.42807
ENSG00000152137	HSPB8	29.2477	27.4411	26.0272	18.8564	27.346	24.0072	19.4633	27.4563	17.1664	17.4441	22.8623	16.688	19.2959	26.557	17.7528	16.8487	25.4967	16.561	16.0372
ENSG00000102908	NFAT5	5.80533	6.8056	1.67192	2.53935	6.94523	1.49916	2.2368	5.45074	1.9522	3.74825	5.90578	1.1384	1.20374	6.61899	2.4469	4.08682	3.86753	0.985495	1.47987
ENSG00000106483	SFRP4	0.109335	0.03145	0.053479	0.037879	0.168935	0.026336	0.028715	0.189746	0.152107	0.033354	0.072568	0.190324	0.068379	0.137267	0.125738	0.017791	0.055571	0.103493	0.062613
ENSG00000102900	NUP93	59.2904	62.412	55.2541	41.6138	61.8821	57.038	42.9055	63.7337	54.932	42.91	62.4873	51.875	34.0827	58.5865	48.6123	42.2738	58.0896	50.4045	36.1585
ENSG00000102901	CENPT	30.0339	28.4383	32.8024	18.2264	29.3247	30.763	27.1656	23.2955	25.2977	24.8142	24.3215	26.1116	21.5017	25.8092	28.4333	24.1467	18.3776	26.2424	19.726
ENSG00000102904	TSNAXIP1	0.23185	0.283847	0.57119	1.0028	1.07939	0.165194	1.3382	0.536828	0.429431	0.415559	0.818456	0.431933	0.343285	0.418823	0.642251	0.283367	1.52558	0.967328	0.286339
ENSG00000106484	MEST	0.05394	0.088816	0	0.066229	0.028116	0.021224	0.07263	0.122753	0.120358	0.120187	0.08662	0.128358	0.090708	0.102468	0.071467	0.147826	0.046893	0.275034	0.10111
Human_newGene_48152	Human_newGene_48152	5.30506	4.57497	1.28224	0.996921	4.26441	1.85842	0.931604	1.74529	0.813493	1.95414	2.1416	0.622579	1.71278	2.30482	1.15759	2.12908	2.91255	0.778494	0.449499
Human_newGene_48151	Human_newGene_48151	0.421009	0.677874	0.11663	0.536946	0.58972	0.412051	1.2827	0.763912	0.448513	0.470881	0.601991	0.736062	0.056737	0.392339	1.07408	0.715115	0.396432	0.564979	0.608007
ENSG00000127364	TAS2R4	0.299331	0.639728	0.199887	0.496355	0.543336	0.153342	0.12809	0.150434	0.118573	0.208003	0.096191	0.113858	0.122291	0.15417	0.169276	0.071156	0.138931	0.033963	0.078095
ENSG00000178802	MPI	11.2608	10.4177	9.45646	7.54432	7.45331	7.10479	5.58195	12.9314	8.76733	6.46753	14.0368	8.76976	10.3754	10.0449	7.87756	6.88948	9.9274	7.84472	4.93346
ENSG00000143079	CTTNBP2NL	28.9378	26.0228	7.67495	8.59534	25.0971	7.42131	6.82227	25.5815	5.35245	12.9281	24.1456	5.13961	8.09339	26.043	7.56285	11.9611	23.6229	5.20414	6.47158
ENSG00000178804	H1FOO	0	0	0	0	0	0	0	0	0	0	0	0	0	0	0	0	0	0	0
ENSG00000266265	KLF14	0.535762	0.759911	0.949035	0.267318	0.821654	0.672296	0.352954	0.396608	0.421642	0.359569	0.371492	0.357683	0.21531	0.448287	0.460726	0.211884	0.364716	0.333879	0.30615
ENSG00000251369	ZNF550	2.21956	2.36932	1.35435	1.59196	1.98852	1.15659	0.956142	2.8895	2.16331	3.18872	2.46613	1.58072	2.1997	2.75443	2.95135	2.5772	2.89266	1.56874	2.10362
ENSG00000178809	TRIM73	2.44073	0.845562	0.842449	2.58506	2.16087	0.840278	1.36062	0.518492	0.532948	0.45519	0.840951	0.394891	0.31771	0.588901	2.7551	0.547588	0.39671	1.61383	1.79759
Human_newGene_46616	Human_newGene_46616	0	0	0.097897	0.121854	0	0.094226	0.840775	0	0.095336	0.537196	0	0	0.226904	0	0.214634	0.142435	0	0.249817	0.290258
ENSG00000092020	PPP2R3C	9.8127	6.36714	10.2218	5.38289	10.4541	10.8496	6.26561	10.2705	5.81268	4.37841	8.89581	8.34948	4.60594	10.376	7.58865	4.55635	9.02913	7.47294	4.29582
ENSG00000185942	NKAIN3	0	0	0	0	0	0	0.059502	0.026704	0	0.070518	0.036881	0	0.055287	0.02584	0	0.019591	0.039743	0.044973	0
ENSG00000185940	KRTAP5-5	0	0	0	0	0	0	0	0	0	0	0	0	0	0	0	0	0	0	0
ENSG00000185947	ZNF267	4.43721	4.41072	1.41774	1.90806	4.64385	1.66214	1.19437	5.30018	1.91733	3.79692	5.47886	1.76972	2.62697	5.49835	2.57573	4.16169	6.13585	1.57116	1.61976
ENSG00000185946	RNPC3	4.30271	6.32713	2.97174	2.16811	5.35059	3.13752	2.88755	4.84656	2.87857	2.70067	5.49037	2.5561	2.57848	4.55409	4.02355	4.02967	6.1852	2.40529	2.44011
Human_newGene_27060	Human_newGene_27060	1.58705	0.534108	1.81445	0.519795	1.07402	0.669833	0.348828	1.65943	0.807229	0.887791	1.28645	1.62598	0.801787	1.31274	1.07163	0.689244	1.84099	0.869522	0.963164
Human_newGene_27061	Human_newGene_27061	2.16174	2.33995	2.11591	2.74375	2.49052	2.03984	2.27728	1.11496	1.70058	1.28972	2.22194	3.09763	2.13424	1.9392	1.86016	1.22683	2.08884	2.12955	1.65701
Human_newGene_27064	Human_newGene_27064	0	1.03848	0	0	0.334184	0	0.556495	0.174805	0.256415	0.080798	0	0	0.06837	0	0.315173	0.451136	0	0	0
Human_newGene_27065	Human_newGene_27065	0.432134	0.674328	0.721935	0	0.42313	0.885422	0.270997	0.728179	0.774273	0.715064	1.40782	1.11773	0.467607	1.43168	1.51721	0.510149	1.10378	1.40506	0.452042
Human_newGene_27066	Human_newGene_27066	9.85874	9.16063	7.23963	5.24565	9.34643	6.72094	5.20645	8.09102	6.2539	7.2392	6.05159	5.54275	5.19974	7.35278	6.34105	6.70348	7.76252	5.36907	5.04091
ENSG00000204628	RACK1	469.673	368.587	624.791	383.374	328.639	652.475	427.386	562.12	633.042	412.771	507.492	616.252	633.217	398.618	471.409	560.775	340.296	686.32	553.412
ENSG00000204624	DISP3	0.051474	0.062605	0.031226	0.086012	0.018889	0.123424	0.041196	0.072649	0.096217	0.092473	0.087017	0.107016	0.454026	0.109175	0.089375	0.179516	0.114921	0.111189	0.159178
Human_newGene_47129	Human_newGene_47129	0	0.29125	0.242538	0	0	0	0	0	0	0	0	0	0	0	0	0	0	0	0.149283
Human_newGene_47121	Human_newGene_47121	0.093942	0.188978	0.152759	0.097639	0.171213	0.180423	0.085439	0.208252	0.206166	0.257824	0.058254	0.101292	0.078038	0.091064	0.145242	0.303073	0.094024	0.076836	0.243763
ENSG00000114450	GNB4	15.4239	13.9762	6.10473	5.20172	13.6473	7.14119	5.36773	14.4416	7.35353	9.24323	15.1888	6.63209	5.21656	15.1944	9.61428	8.77555	14.1558	7.18003	5.25514
ENSG00000114455	HHLA2	0	0	0.019832	0	0	0	0	0	0	0	0	0	0	0	0	0	0	0	0
ENSG00000204193	TXNDC8	0	0	0	0	0	0	0	0	0	0	0	0	0	0	0.022777	0	0	0	0
ENSG00000204195	AWAT1	0.011477	0	0	0	0.036082	0	0	0	0	0	0	0	0	0.05914	0	0	0	0	0.051108
ENSG00000162300	ZFPL1	17.6978	20.6677	44.258	29.5885	21.1937	42.7522	32.2685	18.5989	34.8481	21.583	20.9301	38.005	30.0728	19.3196	26.0522	20.7487	22.1378	36.8264	30.7032
ENSG00000142303	ADAMTS10	1.23748	1.44651	1.56548	1.75077	1.27165	1.11573	1.13548	1.66808	1.17579	1.40797	1.36782	1.05064	1.49234	1.63452	1.78418	1.32744	1.47233	1.13215	1.1479
ENSG00000233802	TRIM49D2	0.081841	0	0	0	0.119327	0	0	0.069979	0.0682	0	0	0	0	0	0	0	0	0	0.070958
ENSG00000233803	TSPY4	0	0	0	0	0	0	0	0	0	0	0	0	0	0	0	0	0	0	0
ENSG00000011083	SLC6A7	0	0	0	0	0.026213	0.013959	0.015818	0	0.015082	0.026458	0	0	0	0	0	0	0	0.011956	0
ENSG00000163518	FCRL4	0	0.013484	0	0	0	0	0	0	0	0	0	0	0	0	0	0	0	0	0.013422
ENSG00000163519	TRAT1	0	0	0	0	0	0	0	0	0	0	0	0	0	0	0	0	0	0	0
ENSG00000183475	ASB7	4.62255	4.68457	0.983224	1.4533	5.81849	1.50652	1.77394	4.69235	1.89342	4.36176	4.46168	1.22091	2.06593	5.20142	2.11881	2.85077	3.79346	1.48375	1.4801
ENSG00000183474	GTF2H2C	25.2322	26.0826	13.91	10.5559	27.4181	13.5719	8.98706	19.9818	10.3655	11.9943	22.6511	11.6935	8.50757	23.9135	10.6715	10.4261	21.2335	9.35038	7.92182
ENSG00000163516	ANKZF1	3.61484	6.11686	3.78976	3.00515	5.96847	3.55588	2.38927	5.85984	4.95034	5.991	7.69823	3.6131	4.2446	5.74317	6.21906	6.78365	6.91778	3.51852	2.97904
ENSG00000163517	HDAC11	4.22141	5.78868	6.72957	3.37661	5.70996	6.6025	6.31334	7.73788	5.87134	5.67907	8.45332	5.96001	6.44854	7.93102	5.54735	7.05567	10.7868	5.28148	6.23238
ENSG00000163510	CWC22	13.1608	13.1759	4.81874	2.89039	13.2116	4.64253	2.57108	15.4869	3.74334	6.65959	15.5726	3.34197	4.57367	15.5904	4.41877	5.81804	13.5025	3.14779	3.32006
ENSG00000283199	C13orf46	0.439989	0.60036	0.40874	0.710972	0.486463	0.203114	0.378193	0.266871	0.345728	0.252754	0.212495	0.238996	0.222041	0.322768	0.197736	0.413296	0.347766	0.211561	0.181143
ENSG00000163513	TGFBR2	16.3577	17.0824	3.07679	4.18519	17.2594	3.91767	2.98134	13.304	3.08963	9.99369	11.219	1.81837	6.80397	13.7221	4.88241	11.5684	11.9907	2.10626	3.65241
ENSG00000205572	SERF1B	15.43	15.5175	15.0938	19.0992	13.995	17.921	18.6642	13.6687	15.1054	13.8231	9.79682	11.7227	15.7282	18.8625	24.2307	13.8417	12.5532	21.8543	17.036
ENSG00000205571	SMN2	57.398	23.8528	16.1342	33.9517	57.8919	66.4091	24.4297	36.3552	48.3619	33.1044	17.0674	54.7094	38.7794	44.1655	15.3367	32.3879	32.3983	37.4741	43.96
ENSG00000187545	PRAMEF10	0	0	0	0	0	0	0	0	0	0	0	0	0	0	0	0	0	0	0
ENSG00000127540	UQCR11	28.0359	24.8314	42.0657	57.9286	26.3556	43.354	61.3097	27.0744	46.5765	51.1105	27.3547	42.4455	57.2625	28.7205	39.3519	50.1199	25.2081	45.4981	56.2903
ENSG00000106070	GRB10	9.49589	9.59746	4.45913	3.19688	9.17206	3.74348	2.77998	7.60151	2.47218	6.80179	6.86368	2.21309	3.71108	6.83289	2.61685	7.07905	8.8268	2.04933	2.67693
ENSG00000143199	ADCY10	0.051337	0.058482	0.140147	0.116767	0.151605	0.166479	0.02382	0.149192	0.154871	0.084637	0.140978	0.129904	0.054011	0.118044	0.142757	0.029802	0.107428	0.038772	0.049022
ENSG00000156234	CXCL13	0.089855	0.310165	0.656338	0.417771	0.21617	0.394801	0.390724	0	0.112975	0.164466	0	0	0.04235	0.170525	0.124837	0	0.180187	0.130058	0.038336
Human_newGene_26001	Human_newGene_26001	2.19965	2.56708	2.25987	2.23207	1.94283	2.26288	1.80949	1.12821	1.78843	1.96615	1.9295	2.11514	1.70944	1.23027	2.30169	1.72942	1.78139	2.51163	1.79675
Human_newGene_26000	Human_newGene_26000	1.31246	1.05221	0.730277	0.863644	0.847244	0.318105	0.471926	1.52955	0.958514	0.391929	1.28211	0.513377	0.378713	1.05336	0.807285	0.670654	0.950411	0.353105	0.207693
Human_newGene_26003	Human_newGene_26003	0.575939	0.472764	0.360206	0.118855	0.711332	0.415996	0.588327	0.359457	0.211495	0.28802	0.313349	0.643028	0.331999	0.760994	0.421114	0.292434	0.551243	0.43746	0.13501
Human_newGene_26002	Human_newGene_26002	1.54436	2.00385	0.992343	1.95576	1.48319	1.58065	0.738436	1.87161	1.56603	2.12469	1.61543	0.925265	1.25744	1.44227	1.62643	2.3839	1.92972	1.10748	1.49558
Human_newGene_26005	Human_newGene_26005	0.04504	0.357956	0.174367	0.159965	0.316409	0.073246	0.181467	0.743093	0.349005	0.141925	0.345245	0.024891	0.061015	0.462367	0.116772	0.149581	0.550273	0.431448	0.155298
Human_newGene_26004	Human_newGene_26004	0.293792	0.271421	0.450365	1.62802	0.305449	1.57668	2.22671	0.176891	0.856925	2.40761	0.285132	3.41789	2.06732	0.172869	0.857425	2.36349	0.313503	1.99925	3.54735
Human_newGene_5358	Human_newGene_5358	0.3918	0.192283	0.380225	0	0.554866	0.193323	0.207048	0.566774	0.039749	0.072633	0.347146	0.431972	0.149624	0.322608	0.124352	0.179838	0.355942	0.196929	0.213634
ENSG00000125945	ZNF436	3.04604	3.53224	1.69719	1.3838	3.16376	2.0214	1.02919	3.76734	2.98464	2.76754	3.19108	2.29702	2.40522	3.65712	3.74095	2.83002	3.09812	2.0988	2.28052
ENSG00000125944	HNRNPR	98.5258	103.615	72.2412	22.0528	98.2499	64.7272	27.9535	111.991	48.1157	43.7423	109.478	64.3615	28.3944	99.1362	63.4897	44.2816	100.735	61.5197	29.9781
ENSG00000090316	MAEA	32.419	36.6919	24.1805	16.3724	36.5456	26.4922	16.3433	23.7206	17.3725	18.9843	23.0269	19.4831	20.8542	33.9302	20.2364	17.3384	43.0928	20.7576	16.2325
ENSG00000278272	HIST1H3C	0	0	0	0	0	0.058414	0	0	0	0	0	0	0	0	0.122071	0	0	0	0
ENSG00000106078	COBL	6.76878	6.72187	5.57168	5.35433	6.86538	5.41104	5.41011	8.17149	7.1231	6.20069	10.2819	6.83655	4.68209	7.67764	6.44586	7.26847	8.65487	6.68408	5.8298
ENSG00000148655	LRMDA	0.064014	0	0	0	0	0.092506	0.015026	0.087312	0.02875	0.047561	0.061154	0.026242	0	0.038455	0	0.048432	0.129539	0	0
ENSG00000008394	MGST1	17.8559	16.1566	32.9576	31.0343	17.4984	21.2725	40.6168	15.4414	17.0081	15.0346	17.7038	18.6211	19.1342	17.9136	15.4986	18.9736	20.4128	17.2029	24.2289
ENSG00000130414	NDUFA10	19.0102	20.7515	25.2367	30.9218	19.2001	30.9933	32.7532	20.3905	28.5603	31.6485	23.1773	32.5097	24.9416	26.8333	28.4823	32.1716	23.4011	26.3549	38.4385
ENSG00000130413	STK33	3.14749	4.12953	3.65916	3.0863	4.01258	3.27913	3.08236	3.64264	4.06331	2.54771	4.53317	3.67745	1.40091	2.76999	2.71669	2.0903	3.47408	3.09705	1.63192
ENSG00000050628	PTGER3	0.069617	0.150304	0	0.072411	0.045594	0.093849	0.17772	0.205901	0.055112	0.097977	0.138141	0.095718	0.043782	0.134383	0.062325	0.03532	0.147394	0.088655	0.05978
ENSG00000164898	FMC1	3.63624	3.64442	6.80638	12.1503	4.67979	6.91606	9.43503	2.66187	7.8401	4.98202	3.79843	7.8825	7.93484	3.27316	6.18514	6.11263	4.19495	8.7007	6.96203
ENSG00000164896	FASTK	6.85614	7.48813	12.7544	9.17313	7.39101	11.1055	8.78134	6.84894	10.7593	7.75369	6.19371	10.084	10.1704	5.89087	9.76663	9.49214	6.5599	11.4469	8.61707
ENSG00000164897	TMUB1	13.0289	12.6596	19.2105	11.5328	11.6005	16.7224	8.64104	13.1952	9.97596	12.5024	14.2176	10.2455	8.7213	14.9007	8.69933	12.3016	16.109	9.00974	6.85257
ENSG00000164893	SLC7A13	0	0	0	0	0	0	0	0	0	0	0	0	0	0	0	0	0	0	0
Human_newGene_10151	Human_newGene_10151	2.89674	4.45725	1.79991	2.46237	3.52398	1.63923	1.29055	3.57475	1.5702	3.41896	4.19626	0.959314	1.42295	2.49047	3.76561	2.06489	2.58121	1.34699	1.56711
ENSG00000044446	PHKA2	3.35801	3.34901	3.15713	3.45291	3.43423	3.41354	2.96366	3.68622	3.85113	3.16884	4.12262	2.83597	2.53662	3.73042	3.65965	3.01421	4.17602	3.25173	2.68353
ENSG00000155622	XAGE2	6.34697	5.23491	7.35278	6.05925	6.73341	7.03871	7.8597	5.81402	8.83377	5.92918	6.36205	11.2101	7.18673	6.19554	8.89048	4.221	7.38436	7.97854	6.91891
ENSG00000155621	C9orf85	5.38767	5.16834	3.06231	2.0082	5.22828	3.0975	2.24594	5.17405	3.1428	2.60335	4.66176	2.58006	2.89535	4.59253	3.25585	3.0433	5.25405	2.00004	2.18137
ENSG00000182704	TSKU	15.0597	14.4228	3.29539	4.78066	14.0621	4.95138	3.54353	17.5993	7.44425	14.502	16.5192	3.85659	12.5821	17.4207	10.6463	14.45	17.6122	4.26239	6.49919
ENSG00000182700	IGIP	0.328069	0.566265	0.06116	0.081225	0.341785	0.226295	0.128165	0.58348	0.411346	0.457633	0.603137	0.482639	0.581958	0.688907	0.789514	0.334084	0.517457	0.398035	0.254961
ENSG00000155629	PIK3AP1	1.54725	1.2234	1.08832	1.19114	1.22428	0.778656	0.738882	1.90087	1.12994	1.12731	1.69196	1.17842	0.764896	1.7816	1.10259	1.39621	1.43877	1.17353	1.16977
ENSG00000186638	KIF24	7.47694	7.84059	6.07728	5.36783	8.3035	5.15038	5.177	7.70472	4.7346	5.08032	8.14296	4.45819	2.44645	7.38921	5.55796	5.32993	8.19056	2.80147	3.52685
ENSG00000011332	DPF1	1.6812	2.28863	0.94098	0.691429	1.88251	1.16467	0.607183	1.87354	1.37471	1.68221	2.00919	1.11068	1.13234	2.3357	1.08403	1.46879	1.90383	0.917953	0.720666
ENSG00000186635	ARAP1	12.845	13.7281	11.669	14.3856	13.3779	13.1831	12.494	13.3544	10.4598	13.4267	13.2429	9.98165	9.99664	13.7022	9.63986	13.5464	14.7385	11.2012	10.2995
ENSG00000170615	SLC26A5	0.023749	0	0	0.065326	0	0.027045	0	0	0.090035	0.047799	0.012623	0.032304	0.024119	0.019104	0.04808	0.047851	0.016566	0.052176	0.024778
ENSG00000170613	FAM71B	0.04298	0	0	0	0.039167	0	0	0.079184	0.022423	0.019667	0.019989	0	0.040515	0	0	0	0	0.017774	0.01846
Human_newGene_17875	Human_newGene_17875	0.09276	0.143843	0.569363	0.273548	0.075948	0.30994	0.273609	0	0.107106	0.038137	0.058957	0.139487	0.1418	0	0.225094	0.03743	0.167269	0.3596	0.313931
ENSG00000196154	S100A4	11.4571	10.8514	20.2325	21.1339	12.637	19.8169	24.196	7.53372	11.7866	9.87242	9.64131	11.1415	12.2264	7.26706	12.0161	10.8983	8.48791	14.2767	10.7263
ENSG00000196155	PLEKHG4	24.7868	23.5877	21.9896	23.6886	25.9299	21.6285	22.2328	20.7176	22.3239	24.751	18.7111	20.45	18.1367	17.3096	22.4018	24.9615	20.4007	25.5132	25.2217
ENSG00000196156	KRTAP4-3	0	0	0	0	0	0	0	0	0	0	0	0	0	0	0	0	0	0	0
ENSG00000196150	ZNF250	2.67516	3.17474	1.96333	1.38758	2.68587	1.15257	1.67398	4.56908	2.58497	3.70672	4.01687	1.5036	2.93867	3.91867	2.71423	4.5718	3.28657	1.53852	2.58904
ENSG00000196151	WDSUB1	2.48806	3.00582	1.71824	1.79821	3.12944	2.4662	1.04313	3.59779	1.23237	2.11007	2.89629	1.27178	1.11083	3.3272	2.24208	1.80318	3.80163	0.925668	0.887527
ENSG00000196152	ZNF79	1.95199	2.20981	1.46067	2.0948	2.09777	1.38945	1.62199	1.76614	1.91711	3.3241	1.90859	1.27102	3.30219	1.9433	2.44431	3.74348	1.74915	1.2266	2.67447
ENSG00000128340	RAC2	2.08512	1.41733	1.20196	0.718675	1.68152	1.31115	1.03869	2.38925	1.04191	2.43741	2.90745	1.06838	1.60938	2.26494	1.41091	1.9112	3.74104	1.77714	1.18303
ENSG00000128342	LIF	27.7971	23.5188	7.76216	6.85733	18.3145	9.29186	7.18538	28.2004	8.98991	15.8084	17.2238	7.25033	16.2849	29.0626	9.37031	15.5515	17.1585	7.33758	10.1417
ENSG00000128346	C22orf23	4.94009	4.58186	1.41077	0.782425	4.85942	1.87218	1.28727	6.04991	2.02847	2.72352	6.10954	2.19105	2.52409	5.11246	2.66209	2.86496	4.73955	1.91814	1.89601
ENSG00000120594	PLXDC2	0.402219	0.359465	0.235741	0.168604	0.367681	0.289608	0.229471	0.436708	0.284951	0.169585	0.557744	0.309004	0.13238	0.488617	0.25372	0.292732	0.667336	0.27393	0.203348
Human_newGene_4406	Human_newGene_4406	2.06402	3.02346	1.28573	0.765403	2.17259	1.25143	0.405056	4.05658	1.77234	2.2552	3.24112	1.49466	1.67538	3.22155	2.09392	2.13869	2.96707	1.23023	1.18853
ENSG00000104881	PPP1R13L	31.002	36.0134	29.2634	29.3124	32.9176	28.3281	28.8107	21.2932	19.2709	26.5381	25.015	16.3654	19.2238	22.3171	18.0269	25.5586	25.0488	16.2578	16.3506
Human_newGene_8182	Human_newGene_8182	0.462986	0.113942	0.047847	0.341128	0.210651	0	0.04898	0.04371	0	0.168487	0	0.068768	0	0.181528	0	0	0	0.096331	0.109638
ENSG00000175398	OR10P1	0	0	0	0.00414	0	0	0	0	0	0	0	0	0	0	0	0	0	0	0
ENSG00000175395	ZNF25	1.1494	0.755145	0.656264	0.512437	1.05109	0.681221	0.383794	1.85658	0.915671	0.73193	1.53462	0.686613	0.938564	1.75143	0.999623	0.708033	1.80107	0.711244	0.669995
ENSG00000175390	EIF3F	116.602	18.8034	191.699	163.732	19.9244	26.5288	27.8481	115.149	36.8653	31.9178	16.2884	184.455	26.1863	26.3129	172.869	19.8567	114.382	23.7153	26.6987
Human_newGene_38266	Human_newGene_38266	0.325589	0.397885	0.159257	0.056401	0.296701	0.104803	0.475061	0.360715	0.282723	0.740624	0.5707	0.52525	0.355845	0.463851	0.855158	0.503131	0.60186	0.582724	1.05938
ENSG00000198088	NUP62CL	4.98103	4.38213	2.47125	4.44738	5.91704	2.32977	3.96264	7.07155	5.13715	7.31473	6.27938	6.7909	3.7777	6.84142	6.13614	5.16906	8.08103	5.27768	5.51552
ENSG00000198089	SFI1	5.55138	5.61492	5.19192	5.51772	5.24141	4.68883	6.48416	5.33835	6.24396	5.92354	6.28842	5.10468	4.88613	5.49586	5.50945	6.32524	5.82448	5.19564	4.6737
ENSG00000096006	CRISP3	0	0	0	0	0	0	0	0	0	0	0	0	0	0	0	0	0	0	0.020143
ENSG00000134882	UBAC2	9.37384	9.97803	9.36769	9.45347	9.83753	8.75979	9.55382	8.21214	5.46896	6.1897	7.98818	5.83196	7.07524	8.91292	6.49117	6.98315	7.46729	6.89262	5.70735
ENSG00000198087	CD2AP	17.1735	15.4337	6.38876	4.7914	15.3555	6.42081	4.70276	13.8466	4.01057	9.21969	13.2515	3.69296	3.94696	14.8912	5.90109	8.9501	12.9315	3.61729	3.8115
ENSG00000198081	ZBTB14	5.44747	5.09469	1.32032	1.53102	3.80575	1.93943	0.895909	6.99016	1.85331	2.86262	4.12939	2.21501	1.52556	5.54103	2.17789	3.38935	3.97374	2.58118	0.957396
ENSG00000134884	ARGLU1	8.6511	9.65586	3.22309	3.59453	9.43868	3.31394	3.14506	8.59081	4.1302	6.00645	8.16529	3.23434	5.1004	8.63405	4.82915	5.9465	8.29162	3.15143	3.60735
ENSG00000198083	KRTAP9-9	0	0	0	0	0	0	0	0	0	0	0	0.026236	0	0	0	0	0	0	0
Human_newGene_35094	Human_newGene_35094	0.577668	0.813383	0.275093	0.297226	0.977855	0.297835	0.128538	0.403214	0.421027	0.413294	0.407839	0.255192	0.296303	0.397484	0.390826	0.228059	0.34765	0.326046	0.251672
ENSG00000198336	MYL4	0	0	0.143677	0	0	0	0.159329	0	0	0	0.232856	0.107611	0	0	0.175042	0	0	0.203657	0.106328
ENSG00000198331	HYLS1	7.44085	7.98954	3.89786	2.38536	9.93289	4.00358	2.08748	5.54316	2.92886	2.90491	10.6732	2.69969	3.78405	5.6142	2.68548	3.40522	8.84502	2.8494	2.70979
Human_newGene_5435	Human_newGene_5435	14.8079	17.2164	50.6602	78.8172	43.0735	90.5357	96.1953	35.0167	81.8272	68.3256	50.5774	66.6876	75.7011	46.951	58.8484	80.0444	28.5914	63.5089	87.7048
ENSG00000276547	PCDHGB5	0.348555	0.402213	0.132612	0.206185	0.297881	0.092199	0.132024	0.451756	0.476071	0.426952	0.444547	0.31495	0.133569	0.670915	0.579838	1.07145	0.493723	0.247587	0.349104
Human_newGene_459	Human_newGene_459	0.533253	0.058816	0.561368	0.343097	0.965767	0.47434	0.731647	0.152678	0	0.868585	0.30373	0.22762	0.385262	0.692344	0.695527	0.128978	0.346719	0.559786	0.42131
ENSG00000160796	NBEAL2	9.21929	9.95443	9.97753	17.2198	9.77607	9.14762	11.4122	9.37272	13.0323	9.6275	9.21734	10.3086	9.43414	8.95195	10.7437	7.42382	9.24148	12.8965	12.6217
ENSG00000160791	CCR5	0	0	0	0	0	0	0	0	0	0	0	0	0	0	0	0	0	0	0
ENSG00000160799	CCDC12	18.9112	33.1773	2.64897	4.64266	31.2539	3.65864	3.52516	38.0555	5.88251	12.1749	35.2799	3.64715	11.7652	23.4731	12.6772	16.5426	27.6994	3.24156	6.28195
Human_newGene_28093	Human_newGene_28093	1.1325	0.889678	0.791792	1.05743	1.34133	0.533544	0.751355	0.852811	1.23959	0.933708	1.18029	0.958355	0.788704	0.877208	1.00257	0.978975	1.73145	1.11195	0.335962
Human_newGene_28095	Human_newGene_28095	0.610323	0.294392	0	0	0.104294	0.064565	0	0	0	0.092032	0.205944	0.051727	0	0.10053	0	0.180205	0	0.066571	0.272568
ENSG00000167220	HDHD2	8.63418	7.2933	8.99307	8.02381	8.2212	8.73057	7.89338	9.66629	8.20558	6.07757	8.73566	8.43047	7.18972	9.07867	7.92837	6.3445	7.91396	8.91657	7.7487
Human_newGene_28097	Human_newGene_28097	0.066976	0.083111	0.277969	0.251665	0.066244	0.538776	0.201838	0.026714	0.296401	0.197195	0	0.386129	0.304158	0.018382	0.33932	0.184413	0.056655	0.201131	0.319809
ENSG00000168040	FADD	15.949	17.4986	3.0445	3.0738	16.5575	3.8805	3.44708	13.4551	5.58759	12.2056	13.3226	4.05381	9.78816	13.4688	8.13338	12.2725	14.255	3.52282	5.00303
Human_newGene_3171	Human_newGene_3171	0.893004	0.248199	0.066894	0.054725	0.390205	0.20985	0.089795	0.55732	0.256663	0.181482	0.630699	0.089579	0.103089	0.58196	0.235452	0.280084	0.647697	0.156098	0.046991
ENSG00000249861	LGALS16	0	0	0	0	0	0	0	0	0	0	0	0	0	0	0	0	0	0	0
ENSG00000249860	MTRNR2L5	0	0	0	0	0	0	0	0	0	0	0	0	0	0	0	0	0	0	0
ENSG00000176155	CCDC57	13.4954	12.9479	7.57146	8.37777	14.8181	6.94256	6.66317	9.30467	7.21794	7.99249	10.8622	5.9822	6.26992	9.98558	7.7586	7.87158	10.4257	6.1647	4.97438
ENSG00000176153	GPX2	0.506965	0.463364	0.11836	0.296479	0.587787	0.179089	0.15104	0.524257	0.290388	0.326019	0.346569	0.246325	0.144972	0.242079	0.283551	0.418899	0.324509	0.267974	0.114389
Human_newGene_22937	Human_newGene_22937	0.747661	0.112716	0	0	0	0	0.153777	0	0	0	0	0	0.320967	0	0.125428	0.115576	0.55063	0.178812	0.116069
ENSG00000198399	ITSN2	14.618	15.5395	7.46131	8.02102	14.5423	7.88499	6.1322	16.5777	7.38701	13.0314	14.7703	7.69257	7.38861	17.2199	9.3732	12.4075	14.0113	7.37498	6.5105
ENSG00000146166	LGSN	0	0	0.022831	0.010776	0	0	0.011346	0.133578	0.015679	0.026489	0.080763	0.019748	0.032363	0.10767	0.074168	0.097879	0.113908	0.083083	0.043781
ENSG00000036473	OTC	0	0.014713	0.033025	0	0	0	0	0.032289	0	0	0	0	0.032143	0	0	0	0	0	0
ENSG00000132109	TRIM21	6.96076	8.33535	4.43995	4.24576	8.64237	3.77934	2.99553	7.85791	4.86648	6.96624	7.36016	3.40345	6.04101	6.97645	7.12977	6.27569	9.06314	4.42842	4.11562
ENSG00000133275	CSNK1G2	20.5	21.9861	16.4058	8.28589	20.2825	15.359	7.13034	18.6863	13.7191	12.5477	20.0365	11.493	9.44917	18.5894	12.6793	13.3313	19.1723	11.7505	7.50034
ENSG00000148300	REXO4	16.7045	16.8001	7.56471	6.5446	17.2833	8.73657	8.11358	12.8534	5.77918	11.2787	13.6315	5.3728	8.65139	13.518	7.33773	9.79424	13.4988	5.32111	6.64664
ENSG00000188488	SERPINA5	0	0.099788	0.022624	0.154538	0.078515	0.022333	0	0.124664	0.284662	0.259772	0.182562	0.165007	0.115213	0.209517	0.106131	0.287148	0.181218	0.190901	0.199764
ENSG00000275163	AC117457.1	0	0	0	0	0	0	0	0	0	0	0	0	0	0	0	0	0	0	0
ENSG00000148308	GTF3C5	27.6864	33.0684	28.9749	23.3924	32.4251	28.2308	25.2385	26.7948	14.5041	22.5802	28.463	15.2511	19.2352	24.8926	17.3505	22.9922	28.6939	18.8682	17.5625
ENSG00000095066	HOOK2	8.76452	9.96046	8.78582	8.04816	8.61121	12.1891	6.62251	10.4916	9.86276	8.21211	11.9585	10.1687	7.4197	14.2378	9.72026	7.76322	11.9123	10.2325	6.91872
ENSG00000135823	STX6	8.89339	8.67343	3.219	2.89164	8.50001	2.97501	1.79096	6.59492	2.50504	6.55207	6.61897	1.74257	4.4487	7.27539	3.57592	6.22278	6.93805	1.78733	2.80631
ENSG00000135821	GLUL	7.30902	8.61912	8.75947	5.06767	7.95725	9.23209	7.76115	8.88865	8.80933	10.7409	8.69933	6.37664	11.5642	9.50829	10.1061	8.3493	9.96619	6.66709	9.44782
ENSG00000135824	RGS8	0	0	0	0	0	0	0	0	0	0	0	0	0	0	0	0	0	0	0
ENSG00000135829	DHX9	116.189	110.731	89.7951	88.4676	111.62	87.8842	83.4228	95.3623	72.2607	71.2345	87.9515	66.9645	52.8238	90.7638	77.0908	72.7505	88.094	64.883	62.0743
ENSG00000135828	RNASEL	0.883269	0.831562	0.366395	0.342926	0.948365	0.555815	0.344939	1.33593	0.674889	0.689843	1.17833	0.39893	0.669758	1.23721	0.748624	0.867603	1.0648	0.510318	0.397005
ENSG00000166220	TBATA	0	0	0	0	0	0	0	0	0	0	0	0	0	0	0	0	0	0	0
ENSG00000083520	DIS3	3.78091	3.87364	2.65541	1.61201	4.02926	1.92652	2.12404	2.90998	2.35127	3.31396	3.16067	2.06388	2.66864	2.81611	2.82459	3.44207	3.2918	1.33197	1.95524
ENSG00000249240	AC069368.1	0	0	0	0	0	0	0	0	0	0.3414	0	0	0	0.139584	0	0	0.217589	0	0.088507
ENSG00000249242	TMEM150C	0	0.038146	0.048125	0	0.029886	0.027079	0	0	0	0.035753	0.030454	0.021916	0	0.00665	0.045665	0.01601	0	0	0
ENSG00000162769	FLVCR1	2.22727	2.48277	1.32535	1.5416	2.04446	1.46178	1.84033	2.39683	1.49618	1.85392	2.77359	1.28805	1.17553	2.45776	1.73632	1.84572	2.20793	1.12549	1.4504
ENSG00000241476	SSX2	0	0	0	0	0	0	0	0	0	0	0	0	0	0	0	0	0	0	0
ENSG00000173253	DMRT2	0.065939	0	0	0.023733	0	0	0	0	0	0	0.020444	0	0	0	0	0	0	0	0
ENSG00000173250	GPR151	0	0	0.262997	0.127582	0	0.065183	0.091361	0	0.073049	0.01527	0.01628	0.122962	0.032997	0.016636	0.081235	0.068352	0	0.08488	0.027113
ENSG00000173258	ZNF483	0.249345	0.317806	0	0.19487	0.278123	0.042839	0	0.2084	0.172137	0.27261	0.45606	0	0.027878	0.292109	0.033506	0.333039	0.364029	0.023687	0.031756
Human_newGene_16396	Human_newGene_16396	0.291908	0.217061	0.063827	0.162579	0.23577	0.225544	0.154456	0.699095	0.527482	0.902544	0.869638	0.362627	0.183946	0.435306	0.559947	0.996223	0.642491	0.415453	0.338041
Human_newGene_16397	Human_newGene_16397	0	0	0	0	0	0	0	0.402417	0	0	0	0	0	0	0	0	0.034064	0	0
Human_newGene_16394	Human_newGene_16394	0.121561	0.052532	0.038161	0.181676	0.119003	0.29392	0.096275	0.152239	0.184651	0.416637	0.145331	0	0.046485	0.140791	0.191364	0.461028	0.318949	0.10885	0.0376
Human_newGene_16395	Human_newGene_16395	0.782924	0.982409	0.304145	0.604837	0.811435	0.435912	0.484156	1.62225	0.391963	1.41131	1.34295	0.344619	0.5573	1.315	0.738485	1.64804	1.40953	0.985783	0.533273
ENSG00000116161	CACYBP	50.4171	42.8557	60.5418	41.7343	48.101	60.0268	43.2456	42.709	37.4469	27.8618	44.7829	44.114	26.3543	43.9056	36.5071	28.1993	40.8377	42.9897	24.587
ENSG00000105281	SLC1A5	72.2695	75.4332	59.7571	47.1853	68.7259	55.0165	35.9397	49.1598	35.3407	36.5128	47.1295	26.0293	47.3081	47.0479	41.397	31.7363	46.8278	33.4675	35.38
ENSG00000258973	AL096870.1	0	0	0	0	0	0	0	0	0	0	0	0	0	0	0	0	0.088614	0	0
ENSG00000271092	TMEM56-RWDD3	0.55323	2.11992	0.641644	0.946596	1.27707	0.56244	1.15893	3.19871	1.17021	1.39432	0.738626	0.162509	0.787914	1.46988	0.805813	0.412234	1.14473	2.14629	1.22138
Human_newGene_13340	Human_newGene_13340	0.271154	0.361917	0.027511	0.146132	0.480595	0	0	0.465342	0.060724	0.240569	0.269319	0.027899	0	0.403874	0.118451	0.171603	0.311377	0.024229	0
Human_newGene_13347	Human_newGene_13347	0.136484	0.467195	0.387258	0.212784	0.417978	0.613859	0.144885	0.090866	0.213612	0.084397	0.126951	0.333196	0.263622	0.595206	0.455448	0.398868	0.360286	0.319672	0
ENSG00000021776	AQR	5.86969	6.01751	3.62031	2.88533	5.91668	3.78431	3.22411	6.61279	3.25337	4.23872	7.24808	3.36141	2.28579	6.42139	4.00782	4.21697	7.37777	3.27555	3.49316
Human_newGene_24898	Human_newGene_24898	2.0071	2.43101	1.48427	1.11503	2.41372	1.54598	0	2.39157	0.978959	1.10218	2.26687	0.177106	0.33069	2.9381	0.840125	0.783235	1.84493	1.1946	0
Human_newGene_24899	Human_newGene_24899	0.593088	0.8993	0.121115	0.042845	0.575608	0.070714	0.078454	1.38243	0.47746	0.796043	1.33049	0.431513	0.311552	1.43957	0.800197	0.640528	1.19832	0.36559	0.322181
Human_newGene_24894	Human_newGene_24894	2.41188	2.84448	1.13097	1.14617	2.61367	1.12905	0.810232	1.80523	0.85157	1.45031	1.72881	0.534826	0.427331	2.10957	0.998838	0.976343	2.0987	0.630727	0.35191
Human_newGene_24895	Human_newGene_24895	3.30152	3.64423	2.98631	2.40032	6.9984	2.39161	2.50783	3.08024	3.40785	3.13896	2.71997	3.46818	1.26084	2.86569	3.28761	3.24075	2.96871	2.49978	1.41051
Human_newGene_24897	Human_newGene_24897	0.106621	0.199278	0.775651	1.02626	0.064713	0	0.30638	0	0	0.120843	0.189822	0	0.084972	0.086188	0.307436	0	0.078581	0.248536	0
ENSG00000272674	PCDHB16	0.695492	0.648584	0.506043	0.302984	0.593187	0.374994	0.216152	1.74131	1.34239	1.2802	1.83732	0.911121	0.694237	1.9225	1.83761	1.08326	1.78812	1.16446	0.658796
ENSG00000271321	CTAGE6	0	0	0	0	0	0.016277	0	0.015642	0.012902	0.009483	0.021568	0	0	0.002938	0.038411	0	0.005102	0	0
ENSG00000130997	POLN	0.918816	1.03101	0.806711	0.942865	0.887861	0.557593	0.602157	0.46002	0.315429	0.295902	0.540818	0.21744	0.146219	0.420014	0.361499	0.323975	0.436983	0.23602	0.276297
ENSG00000236737	GAGE12B	0	0	0	0	0	0	0	0	0	0	0	0	0	0	0.011721	0	0	0	0
ENSG00000178502	KLHL11	5.15726	6.5516	1.73922	3.04872	5.76361	3.00185	1.78585	6.25547	4.59139	5.34886	6.44432	3.45278	3.20057	6.60736	5.78072	5.51372	6.02112	3.67916	4.11956
ENSG00000232434	AJM1	1.15952	0.935336	0.855971	0.886309	1.17272	0.969313	1.15275	1.02327	1.09261	1.40268	1.20443	1.00013	0.205115	0.82757	1.18499	1.236	0.95876	1.18308	1.03103
ENSG00000174705	SH3PXD2B	7.59546	7.80912	3.6421	3.42843	8.08915	3.6265	3.96592	8.98405	3.51345	6.25298	9.88689	2.8588	3.1099	9.23591	4.29296	6.44754	9.83107	3.39119	3.0219
ENSG00000234776	C11orf94	0.705487	0.206331	0.4095	0.424204	0.433522	1.06222	0.311791	0.263478	0.363221	0.360035	0.349493	0.581863	0.663647	0.366064	0.254879	0.667607	0.240609	0.334767	0.49263
ENSG00000117691	NENF	6.97106	7.32388	21.0355	34.1863	8.45135	19.7133	32.7055	10.0455	22.9954	24.9711	9.61963	24.2682	32.5607	10.7599	21.4975	24.7785	9.94487	26.067	32.6896
ENSG00000113532	ST8SIA4	0	0.0074	0	0	0	0	0.009384	0	0	0	0	0	0	0.00815	0	0.008372	0.017472	0.013806	0
ENSG00000117697	NSL1	10.1401	9.98655	9.88922	9.99748	10.2246	11.2334	7.16828	9.32363	8.32688	8.55196	10.7492	9.53043	5.91199	9.46498	8.40989	6.18619	8.97992	8.05585	7.84383
ENSG00000145536	ADAMTS16	1.66729	1.21933	0.901831	0.791565	1.33133	1.13183	0.746095	1.02413	0.579153	0.818394	1.01729	0.762221	1.42989	1.11427	0.618103	0.684556	0.907929	0.327039	0.601289
Human_newGene_6493	Human_newGene_6493	0.222783	0.200784	0.243658	0.140297	0.221471	0.208724	0.170042	0.26991	0.245796	0.218955	0.639092	0.165704	0.127276	0.441738	0.387279	0.184423	0.536543	0.286658	0.241732
Human_newGene_6495	Human_newGene_6495	0.460943	0.979538	0.800438	0.773668	0.400752	0.327247	0.363617	1.37465	1.27439	0.925131	0.850792	1.08012	0.71996	1.66234	0.964985	1.3472	0.815676	0.978217	0.533072
Human_newGene_6494	Human_newGene_6494	0	0	0.331754	0.247311	0.084946	0.343454	0.640958	0	0.062408	1.00927	0	0	0.097737	0.142407	0.201908	0.574974	0.142345	0	0.758315
Human_newGene_17114	Human_newGene_17114	0	0	0.100952	0	0	0.199968	0	0.384298	0	0	0.677045	0	0	0.207649	0	0.184654	0	0	0.087276
ENSG00000170935	NCBP2L	0	0	0	0	0	0	0	0	0	0	0	0	0	0	0	0	0	0	0
ENSG00000086544	ITPKC	4.19744	4.0779	1.60609	2.03837	4.34997	1.74944	1.85834	3.18713	1.63155	2.50889	3.8421	1.0862	3.87012	3.11468	1.73155	2.70464	3.8644	1.33966	1.91726
ENSG00000076067	RBMS2	9.2279	9.34964	5.09792	6.38727	8.89328	6.78915	4.63022	7.89215	4.94399	7.31863	7.17061	4.05754	3.17867	7.9871	4.75917	6.42706	7.63836	3.79783	3.37854
Human_newGene_8832	Human_newGene_8832	0.047826	0.324293	0.919544	1.37263	0.095356	0.6906	1.34695	0.164162	0.454062	1.06019	0.282812	0.932519	1.20477	0.300386	0.777498	0.542767	0.273915	0.626675	1.27271
Human_newGene_29967	Human_newGene_29967	1.08685	1.44275	0.24135	0	1.43887	0.141059	0.304094	0.654248	0.152415	0.768739	0.907925	0.158994	0.039341	0.800041	0.456375	0.598805	0.610947	0.154134	0.182169
ENSG00000086548	CEACAM6	0	0	0	0	0	0	0	0	0	0	0	0	0	0	0	0	0	0	0.017195
ENSG00000167283	ATP5MG	35.4753	32.0982	59.5123	87.5129	33.1674	69.9409	115.045	39.351	74.8912	76.4969	33.5061	65.141	77.7787	31.77	71.8602	61.5567	35.6224	62.8347	103.339
Human_newGene_49175	Human_newGene_49175	0	0.068996	0	0	0	0	0	0	0	0	0.148736	0	0.176355	0	0	0	0.638601	0	0
Human_newGene_23811	Human_newGene_23811	0	0	0	0	0	0.166216	0	0	0	0	0	0.15792	0	0	0	0	0	0	0.443081
Human_newGene_49171	Human_newGene_49171	0.420179	0.792928	0.26977	0.31521	0.580037	0.205978	0.023705	0.386854	0.088753	0.216885	0.538325	0.16491	0.239319	0.519062	0.259401	0.282586	0.485084	0.120094	0.182484
ENSG00000039600	SOX30	0	0	0	0	0	0	0	0	0	0	0	0	0	0	0	0	0	0	0
ENSG00000265203	RBP3	0.012012	0.007243	0.014915	0	0	0.033132	0.035101	0.015011	0.027634	0.018195	0.011757	0.048152	0	0.011332	0.025755	0.023648	0	0.017684	0.016287
ENSG00000273259	AL049839.2	0.260927	0.175865	0	0.225779	0.217079	0	0.382194	0.020392	0	0	0	0	0	0	0	0	0	0.005201	0
Human_newGene_23819	Human_newGene_23819	0.462463	0.077282	0.538938	0.529776	0.140281	0.210063	0.029582	0.141516	0.056791	0.620777	0.285185	0.389437	0.14865	0.380022	0.328361	0.29165	0.400898	0.226384	0.343309
ENSG00000156427	FGF18	0.027214	0.04697	0.038374	0	0.074399	0.05256	0.124088	0.154271	0.027165	0.044536	0.03797	0.038878	0.051135	0.038714	0.022626	0.050285	0	0.040912	0.035066
Human_newGene_13937	Human_newGene_13937	0	0	0	0	0	0	0	0	0	0	0	0	0	0	0	0.133059	0	0.115811	0.818293
ENSG00000012779	ALOX5	2.62509	3.40339	2.9019	1.49418	3.07812	2.36979	1.68512	5.09288	5.75754	2.87807	5.88756	5.57888	2.92921	5.46154	4.80561	4.06222	6.05954	5.4906	3.93845
Human_newGene_24903	Human_newGene_24903	2.48642	2.13431	2.92536	3.73567	2.0843	3.15293	3.52039	1.5451	3.15925	1.76538	1.3474	1.08754	0.388087	1.40876	2.3555	1.71172	1.72907	2.31783	1.87508
ENSG00000268173	AC007192.1	0.00603	0.043005	0.580577	0	0.530586	0	16.088	0.00183	0	0	0	0	0	0	0	0	0	0	0
Human_newGene_38709	Human_newGene_38709	0.367186	0.695677	0.272679	0.322021	0.540306	0.586424	0.217338	1.13951	0.245118	0.322657	0.738616	0.451574	0.135782	0.887014	0.529873	0.183244	1.90708	0.199031	0.09137
ENSG00000143278	F13B	0	0	0	0	0	0	0	0	0	0	0	0	0	0	0	0.071404	0	0	0
ENSG00000156395	SORCS3	0.011056	0.016176	0.009184	0	0	0	0	0.044597	0.024489	0	0.05909	0.017882	0.017699	0.035693	0.030502	0.012389	0.051059	0.030461	0.040323
ENSG00000156398	SFXN2	2.02074	2.58819	2.11098	1.62631	3.01752	1.86668	0.974382	1.64579	1.72539	1.59405	1.59675	0.990847	0.746288	1.8666	1.11054	1.2108	1.59144	0.965196	0.752711
ENSG00000275954	TBC1D3F	0	0.012453	0	0	0	0	0	0	0	0	0.023747	0	0	0	0	0	0	0.013986	0
ENSG00000064835	POU1F1	0	0	0	0	0	0	0	0	0	0	0	0	0	0	0	0	0	0	0
ENSG00000176834	VSIG10	3.19194	3.29198	2.65824	3.22069	3.6576	2.24345	2.13115	3.15325	3.73001	3.75303	3.40714	2.51727	1.94082	3.28294	3.55735	3.71713	3.71551	2.88388	2.33148
ENSG00000181626	ANKRD62	0.022884	0.055924	0.018114	0.01918	0.033746	0	0	0.017591	0.077278	0.050328	0.120248	0.049694	0.034442	0.15792	0.067949	0.018077	0.140128	0.030374	0.02285
ENSG00000181625	SLX1B	10.4051	8.85517	0.216125	17.3205	9.95505	20.7699	16.2904	8.78229	27.8124	0	7.81738	21.7841	17.7681	0	20.364	20.4117	8.95995	21.7099	6.99495
ENSG00000110375	UPK2	0	0	0	0.183979	0.05126	0	0	0	0.12313	0	0	0	0.193712	0.056082	0	0.17282	0.084157	0.048802	0
ENSG00000168748	CA7	0.031551	0.138578	0	0.126552	0.09068	0	0.032825	0.020332	0	0.052416	0.069889	0.029348	0.202925	0.059509	0	0.076524	0.100911	0	0.056761
ENSG00000269964	MEI4	0	0	0	0	0	0	0.044739	0.00971	0	0	0.019014	0	0	0.009715	0	0	0.010413	0.008454	0
ENSG00000134690	CDCA8	60.8506	65.1345	22.3288	16.8767	81.0807	29.2696	20.0815	44.5121	12.943	26.6207	80.401	23.2416	18.1621	42.9448	17.8559	25.534	80.2615	20.4239	17.0628
ENSG00000168743	NPNT	0	0	0	0.012217	0	0.011351	0	0	0	0.202936	0.071968	0	0.022013	0	0	0	0	0	0
ENSG00000134698	AGO4	1.56031	1.4586	0.575617	0.472365	1.71591	0.503971	0.518034	2.68655	1.12541	1.72229	2.82523	0.858789	1.05658	2.66207	1.55969	1.89291	2.79491	0.88326	0.741386
ENSG00000108861	DUSP3	13.0973	41.1744	8.53534	7.12884	8.06545	5.76618	5.01546	11.972	19.4398	4.79081	6.87721	4.01218	6.14586	34.8899	6.72284	25.1605	7.3438	3.96248	5.90858
ENSG00000215203	GRXCR1	0	0	0	0	0	0	0	0	0	0	0	0	0	0	0	0	0	0	0
ENSG00000143891	GALM	4.42251	3.47151	3.38919	2.87632	4.35928	2.8144	2.6278	4.41021	2.33297	2.65921	4.36125	2.91863	1.19458	3.88515	2.51649	2.8955	4.4031	3.0876	1.55889
ENSG00000071246	VASH1	7.50793	8.39454	3.74241	1.59972	7.18581	3.72479	1.95773	11.3165	6.0402	6.57068	11.7265	3.87991	3.90491	11.7969	8.05919	6.60949	11.4356	4.5136	2.44646
Human_newGene_8208	Human_newGene_8208	0.421195	0.771605	0.747096	0.3292	0.239749	0.483749	0.375786	1.26042	1.37087	0.668409	0.742552	0.285566	0.149199	1.08527	0.814981	0.686511	1.14	0.472556	0.368023
ENSG00000071242	RPS6KA2	2.24924	2.75922	2.59312	1.50907	3.0375	1.9531	1.88369	2.20966	1.70574	1.21402	2.73687	1.79243	1.80285	2.22011	1.73092	0.870957	2.20612	1.64397	1.01887
ENSG00000071243	ING3	5.43194	6.65714	3.03388	1.85785	5.39316	3.61629	2.56308	5.6276	1.58759	1.45275	4.85578	2.34181	2.08848	4.53444	1.5875	1.53182	5.49126	2.92667	1.3915
ENSG00000102401	ARMCX3	17.1149	15.5208	10.8822	7.75321	11.7652	12.2968	8.22338	11.4912	10.5072	13.3132	11.3754	6.73622	10.5309	17.9943	13.6731	13.3043	17.1876	6.60298	8.21848
ENSG00000105926	MPP6	8.54135	7.56635	2.66877	2.9461	10.789	5.95238	2.97503	4.68343	1.8938	3.9466	7.50196	3.24862	3.42811	5.89375	2.99904	4.95039	7.62803	1.77283	3.19774
ENSG00000105929	ATP6V0A4	0.068938	0.205442	0.259786	0.16081	0.107704	0.09087	0.207209	0.357539	0.170176	0.125603	0.0632	0.096387	0.160775	0.218468	0.092577	0.225321	0.171703	0.161702	0.182755
ENSG00000105928	GSDME	11.2887	10.5732	11.6669	8.35649	11.7868	10.3044	8.45986	14.247	10.4082	10.9604	13.107	12.9399	9.10813	13.2877	11.2396	10.5305	15.2606	9.75359	9.5732
ENSG00000132669	RIN2	11.2164	9.71282	1.97819	1.83043	9.49431	1.95976	1.59103	10.2121	2.516	5.08037	9.81634	1.25899	3.88933	10.4047	3.76391	5.74297	7.80137	1.48778	1.66147
ENSG00000132664	POLR3F	7.02595	6.03997	5.58715	4.15313	6.61979	5.45364	3.32663	6.97662	3.97536	3.93299	6.12405	4.30183	3.79984	6.67212	4.42032	3.68064	5.87396	3.57947	3.14295
ENSG00000132661	NXT1	27.877	27.3244	15.6724	10.8425	24.2263	15.834	7.40376	22.6	23.5626	18.3726	23.2705	16.3385	19.584	21.5576	22.091	18.5142	21.554	15.5827	12.9451
ENSG00000119596	YLPM1	30.729	28.3375	19.3123	22.3944	38.1548	19.2975	18.7603	29.1946	18.6831	22.5117	27.0909	17.5347	15.0161	27.6995	23.3058	21.1796	23.9133	20.2696	17.7038
ENSG00000156282	CLDN17	0	0	0	0	0	0	0	0	0	0	0	0	0	0	0	0	0	0	0
ENSG00000119599	DCAF4	10.7394	10.9533	5.24546	3.6194	10.7629	6.29603	2.7309	10.643	4.60847	5.52805	9.86365	3.24067	3.96885	9.82149	5.24888	6.00103	9.57604	3.38497	3.03251
ENSG00000139679	LPAR6	0	0.02786	0.017601	0.203908	0.016396	0	0.024879	0.041656	0.020769	0	0.016735	0.067572	0.1268	0.049559	0.035907	0.017566	0.026591	0.068989	0.09695
ENSG00000148841	ITPRIP	25.6793	27.939	7.04567	8.37118	25.9903	8.48835	7.67612	19.2322	5.23055	14.027	20.9045	5.44251	16.2822	19.5999	5.85308	13.8996	23.1864	5.23904	11.6274
ENSG00000148840	PPRC1	44.7607	46.961	13.6867	9.58363	40.2272	13.5787	7.04934	32.7747	11.7635	16.9178	29.8557	8.78092	11.3706	32.7123	12.3507	15.9417	29.1432	9.48701	8.26979
ENSG00000148843	PDCD11	31.3776	30.3364	19.642	18.663	31.0066	20.4133	16.7709	28.4898	15.9529	20.9039	27.682	15.4465	13.9732	27.0422	18.0759	19.28	25.5371	14.6673	14.1342
ENSG00000148842	CNNM2	3.72508	3.85947	1.13517	1.59681	3.35498	1.7303	0.970909	3.91132	1.87721	2.74476	3.74324	0.959569	1.68974	3.90989	2.62572	2.47774	4.20573	1.22555	1.12311
ENSG00000187701	OR2T27	0	0	0	0	0	0	0	0	0	0	0	0	0	0	0	0	0	0	0
ENSG00000148848	ADAM12	14.3213	10.9166	9.97443	9.55245	12.5465	10.5465	8.55622	12.7986	10.8473	9.34214	11.1159	9.55613	8.4368	11.3588	10.2702	10.4506	12.6941	8.12129	9.17193
ENSG00000139675	HNRNPA1L2	4.42528	5.64396	3.68054	2.36135	5.60633	4.57125	2.96194	7.89902	7.25068	5.84544	7.07733	6.71652	5.63577	6.24386	6.89193	5.72236	6.47366	6.91954	4.80017
ENSG00000162624	LHX8	0	0	0	0	0	0	0	0.194412	0.046737	0.020478	0.071748	0.008387	0	0.082317	0	0.022237	0.081136	0	0.019565
ENSG00000162627	SNX7	11.2188	10.417	15.8443	10.5421	11.4514	15.4027	12.2335	14.9852	13.182	10.4017	14.9447	14.282	9.99536	15.0351	15.1637	12.0658	14.2304	16.0555	10.5975
ENSG00000162621	LRRC53	0.027965	0	0	0	0	0	0	0	0	0	0.013027	0	0	0	0	0	0	0	0.012031
ENSG00000162620	LRRIQ3	0.750332	0.175743	0.095265	0.331007	0.504782	0.103952	0.088247	0.401541	0.47192	0.443196	0.348836	0.259866	0.125721	0.612973	0.586772	0.190971	0.364826	0.360884	0.060902
ENSG00000162623	TYW3	10.6214	9.34861	13.6516	5.36995	10.8731	9.03857	5.7179	9.14999	6.29317	5.45263	8.40661	5.60457	4.82734	9.30818	6.32247	5.3133	8.188	5.69734	4.96387
ENSG00000188706	ZDHHC9	3.53763	3.00615	3.98772	4.01521	3.48472	3.7178	3.88755	3.99126	2.88075	3.08266	3.09666	3.66925	2.75539	3.23287	3.53898	4.26443	3.1157	3.22123	2.72336
ENSG00000188707	ZBED6CL	0	0	0	0	0	0	0	0	0	0	0	0	0	0	0	0.017991	0	0	0
ENSG00000185634	SHC4	0.022846	0.030009	0.01782	0.049298	0.060819	0.069126	0	0.16536	0.151345	0.149487	0.137355	0.034115	0	0.272905	0.022015	0.128778	0	0.109653	0.09317
ENSG00000165076	PRSS37	0.11374	0.149093	0	0.160461	0.091431	0	0.035964	0.041077	0	0.01209	0	0.028263	0.122472	0.034209	0.034977	0	0	0	0
ENSG00000165071	TMEM71	0.077676	0.040096	0	0.028186	0.205365	0.050629	0.029676	0.077122	0	0.037228	0.084082	0.049219	0.076433	0.138232	0.024167	0	0.027536	0.025514	0.043613
ENSG00000185630	PBX1	3.18577	3.09813	1.47743	0.747755	3.6578	1.83254	0.893972	5.51342	1.95849	1.625	5.0817	1.72091	0.866058	4.43021	2.62137	1.94035	4.82386	1.79086	1.01596
ENSG00000185633	NDUFA4L2	0.091143	0.032166	0.055577	0.044273	0.038253	0.171817	0.049869	0.043296	0.144736	0.096897	0.048896	0.061273	0.217597	0.043314	0.208619	0.212309	0.082506	0.144341	0.180733
ENSG00000165072	MAMDC2	0.352678	0.347099	0.055111	0.216881	0.243729	0.129902	0.076956	0.511549	0.25585	0.188126	0.378575	0.350668	0.215132	0.32139	0.197275	0.227011	0.271864	0.216921	0.23762
ENSG00000165078	CPA6	0	0	0.036767	0	0	0.02607	0	0	0	0	0	0.038567	0	0.051234	0.024893	0.024864	0	0.022329	0
ENSG00000101353	MROH8	0.190032	0.194061	0.473522	0.881514	0.123398	0.197616	0.188522	0.183925	0.413863	0.423533	0.165919	0.129266	0.215812	0.092347	0.125924	0.062457	0.285583	0.210319	0.289839
ENSG00000169903	TM4SF4	0	0	0	0	0	0	0	0	0	0	0.023928	0.023925	0	0	0	0	0	0	0
ENSG00000169902	TPST1	10.3546	10.8169	5.17891	4.52846	12.6412	6.34011	4.63303	20.3138	4.86083	11.9192	20.9542	3.59339	7.23403	13.0483	8.37974	12.8846	13.1881	8.43098	4.36968
ENSG00000169905	TOR1AIP2	13.6865	12.0051	3.4975	5.97591	12.5845	4.33175	4.34977	10.4156	3.98593	7.99431	10.0486	2.85545	5.12549	11.0058	5.49447	7.56595	9.43806	3.35391	3.73566
ENSG00000169906	S100G	0	0	0	0	0	0	0	0	0	0	0	0	0	0	0	0	0	0	0
ENSG00000169908	TM4SF1	70.4066	43.4156	34.5123	77.0924	63.9392	44.5351	53.0261	44.6834	30.0927	107.086	53.9666	38.297	151.03	54.5396	43.1116	85.4571	61.806	31.1748	86.9149
ENSG00000089902	RCOR1	7.79383	7.44902	2.03986	2.41518	8.20539	2.43562	1.69952	7.80681	1.99427	4.4382	7.24598	1.5252	2.18758	8.00233	3.13543	4.72139	7.26486	2.05892	1.65793
ENSG00000180287	PLD5	0.291061	0.299941	0.347483	0.308702	0.244674	0.267684	0.230924	0.475922	0.422553	0.467115	0.322942	0.372475	0.268435	0.852634	0.340226	0.300845	0.342121	0.341761	0.537684
Human_newGene_46503	Human_newGene_46503	0.357418	0.305458	0	0.114759	0.521134	0.159517	0	0.319705	0.065957	0.228034	0.439421	0	0.016521	0.301501	0.057052	0.342065	0.542523	0	0
Human_newGene_46500	Human_newGene_46500	14.4244	12.2311	7.75339	5.73943	15.0062	6.46749	6.79627	11.7637	4.87917	6.42872	13.7987	3.97429	3.51835	11.6511	5.8651	8.17361	14.792	4.89897	4.45531
Human_newGene_46501	Human_newGene_46501	0.298514	0.538256	0.08998	0.25142	0.871946	0.043635	0.224507	0.545337	0.071343	0.277315	0.718255	0.073691	0.139249	0.532431	0.6319	0.18895	0.832749	0.084365	0.076283
Human_newGene_31289	Human_newGene_31289	3.06781	3.43538	6.14982	9.99093	4.91037	10.9087	14.8653	3.41577	7.06003	14.0115	4.3728	17.1967	18.0619	4.4875	7.38624	12.2338	3.60316	14.0382	20.9178
Human_newGene_31287	Human_newGene_31287	0.023212	0	0.214189	0.244003	0.080475	0.079865	0	0.029862	0.479814	0.410593	0.013569	0.200349	0.889391	0.067085	0.163338	0.157384	0.155092	0.123937	0.346319
Human_newGene_31286	Human_newGene_31286	11.0426	11.56	9.48175	18.3468	10.9059	15.0014	31.9684	10.5777	13.9971	18.0837	10.6062	27.566	29.2305	10.1318	15.2478	17.6005	9.46461	18.5306	33.1038
Human_newGene_9852	Human_newGene_9852	0.426557	0.601166	0.138788	0.702429	0.830959	0.514358	0.315404	0.884392	0.28809	0.568242	0.809556	0.080997	0.11577	0.955071	0.439386	0.413028	0.956475	0.101902	0.067639
Human_newGene_9853	Human_newGene_9853	3.64612	3.50497	1.73481	2.22561	4.2573	1.69969	1.85835	3.02563	1.54525	1.90213	3.25142	1.90888	0.843633	2.7486	1.73628	2.34235	3.29982	1.4665	1.21365
Human_newGene_31283	Human_newGene_31283	11.9911	13.9243	15.732	28.2516	13.3015	25.0336	28.074	16.1626	21.6972	35.8394	15.679	39.7405	38.8668	17.3265	20.0364	32.1975	14.9534	29.3994	54.705
Human_newGene_31280	Human_newGene_31280	0.381337	2.71795	0.948688	1.06414	1.08661	0.674468	0.984527	0.890863	2.10461	1.09789	0.845643	1.09455	1.09066	1.97849	1.32952	2.3366	2.28497	1.20484	1.93754
ENSG00000152894	PTPRK	9.36863	10.5072	7.72304	6.35564	8.12221	6.26698	5.76457	9.06048	4.30272	6.7997	8.38172	6.03922	5.53416	8.12949	4.6424	8.24448	8.30844	5.57267	6.16076
ENSG00000138780	GSTCD	6.36994	5.94905	3.24987	3.06126	5.99804	3.92804	2.5364	4.69687	2.45447	3.27574	4.86127	1.84325	2.04263	4.6117	3.08073	3.22699	4.40585	2.20626	1.64712
ENSG00000138785	INTS12	11.5567	10.2173	7.31149	4.43408	7.229	7.98285	6.00354	10.7427	4.41482	5.99723	11.869	4.96291	5.86769	8.28783	5.08387	6.37834	10.7284	5.33826	4.79755
ENSG00000014164	ZC3H3	13.8835	14.435	9.5337	8.54502	13.1427	8.97501	8.57368	11.4191	6.59796	10.0961	11.1447	5.32949	6.88819	11.615	7.51934	9.74875	12.1774	5.33307	6.22719
Human_newGene_39561	Human_newGene_39561	0	0.048383	0.109696	0.174818	0	0.156325	0	0	0	0.05131	0	0.266804	0.369948	0	0.052045	0	0	0.538538	0.185742
ENSG00000258691	AL355102.2	0	0	0	0	0	0	0	0	0	0	0	0	0	0	0	0	0	0	0
Human_newGene_31751	Human_newGene_31751	0	0	0	0	0	0	0	0	0	0	0	0	0	0	0.085036	0	0	0.521787	0
ENSG00000154803	FLCN	11.6973	12.1578	5.1601	4.75172	12.3383	4.9223	4.28602	11.4615	6.43077	9.28025	10.5842	3.3469	8.59887	10.4409	9.12594	8.69613	10.188	4.18075	5.13601
ENSG00000196792	STRN3	12.653	10.6466	2.81566	3.07431	11.2706	3.81377	1.9641	13.1829	2.57893	6.12261	9.96128	2.68083	3.19006	11.9557	2.9968	5.66915	9.71668	1.89343	2.22296
ENSG00000196793	ZNF239	14.6999	13.3827	5.37299	5.61963	14.9101	5.82723	5.37935	12.0362	6.17485	9.16735	9.88893	3.2603	7.2919	12.111	8.59617	8.79099	9.6281	3.69727	3.68411
ENSG00000164304	CAGE1	0.0318	0.045934	0.070848	0.032843	0.014998	0.010912	0.01801	0	0.02532	0	0.015308	0.054433	0.055332	0.014863	0.039852	0.016073	0.016767	0.040837	0
ENSG00000164305	CASP3	8.98787	8.44459	4.01729	4.03658	9.08463	4.76093	4.80228	8.67028	5.3907	8.51863	8.86913	4.78735	9.25529	10.0731	8.05574	8.94128	8.7691	4.567	6.7088
ENSG00000164306	PRIMPOL	5.57547	4.92597	5.36972	2.65296	6.08636	4.07649	2.84855	5.39984	1.85436	2.46252	4.22952	2.73444	1.82925	5.19477	2.58561	2.70072	4.16469	2.72531	1.59767
ENSG00000164307	ERAP1	9.25847	8.81004	6.85537	7.08373	8.92995	7.40545	6.34744	12.8502	10.9328	13.4865	12.4549	10.8398	8.3847	12.5728	13.4051	14.0281	13.1009	10.6371	9.09947
ENSG00000164300	SERINC5	2.03739	2.17388	1.02023	1.88608	2.32255	1.05789	1.14066	3.04576	1.4535	2.94045	2.76278	1.03796	1.78429	2.85921	2.09551	2.75581	2.80407	1.41153	1.64472
ENSG00000164303	ENPP6	0.013732	0	0	0	0	0	0	0.052184	0.014328	0.012441	0	0.013078	0.012944	0.026103	0.012747	0	0.048964	0.022715	0
ENSG00000164308	ERAP2	0.432752	0.383729	0.30448	0.45592	0.276807	0.474598	0.328808	0.458845	0.914627	1.31466	0.648335	0.236793	0.457246	0.449775	1.37922	0.897951	0.831174	0.541163	0.441294
ENSG00000184949	FAM227A	0.465667	0.491161	0.126818	0.149845	0.593143	0.105736	0.220237	0.524572	0.214112	0.280701	0.440216	0.289206	0.142739	0.299713	0.311503	0.256394	0.474211	0.174407	0.118447
Human_newGene_24877	Human_newGene_24877	0	0	0	0	0.029684	0	0	0	0.073983	0	2.02283	0	0.491222	2.12509	0	0	0	0.783481	0
ENSG00000100401	RANGAP1	113.516	112.966	97.1475	79.8504	120.314	96.9845	84.5133	82.353	44.0298	61.711	93.2649	52.1472	48.9362	77.2987	44.6966	61.9913	91.3441	55.3289	53.1067
ENSG00000100403	ZC3H7B	31.6854	33.2232	34.4016	42.3311	30.3784	33.1604	39.3327	25.6528	29.7032	31.6554	27.4768	28.3556	25.7815	26.7471	29.4604	31.3526	28.9524	28.7487	29.7985
ENSG00000104381	GDAP1	2.87522	4.39228	3.12879	3.04251	3.09019	3.30487	3.3934	3.08815	3.49625	2.91779	3.28775	3.72093	2.89975	3.54034	3.86147	3.09655	3.15393	2.97927	2.43801
ENSG00000212899	KRTAP3-3	0	0.065147	0	0	0	0	0	0	0	0	0	0	0	0	0	0	0	0	0
ENSG00000104388	RAB2A	29.3118	28.782	20.2996	9.66747	28.0035	18.1348	10.1259	28.9545	13.4252	16.8706	27.4165	14.6428	13.4237	30.2332	16.9644	16.379	27.6844	16.4868	9.60224
ENSG00000125430	HS3ST3B1	0	0	0	0	0	0	0	0	0	0	0.009367	0	0	0	0.013391	0.009832	0	0	0.008651
ENSG00000125434	SLC25A35	1.29369	1.13947	1.64189	1.02375	1.45527	1.53109	1.3217	2.33179	1.78082	1.30613	1.72486	1.66575	1.31722	1.9927	1.7783	1.74292	2.07255	2.08813	1.67987
ENSG00000203896	LIME1	0.582621	2.85199	0.394144	2.88614	2.2853	2.47214	1.71699	0.475212	2.54304	3.39639	1.35112	1.84503	2.63925	1.03948	1.17512	1.19914	0.216387	1.62213	0.521795
ENSG00000182628	SKA2	59.1131	52.8803	52.9582	60.0391	62.152	59.5669	57.3048	56.0549	45.9868	37.9411	51.4345	52.2082	40.6648	48.2009	50.2106	35.5768	44.8229	53.2058	42.3797
ENSG00000182621	PLCB1	3.24384	2.08334	1.63008	1.04919	2.37177	1.17091	1.07396	2.53146	2.25969	0.974292	2.60133	1.12545	0.361093	2.57515	1.2486	0.94408	2.45458	1.76186	0.910819
ENSG00000256349	AP002748.4	0	0	0	0	0	0	0	0	0	0	1.54701	0	0	0	0	1.55749	2.0305	0	0
Human_newGene_36935	Human_newGene_36935	1.47994	0.986616	1.06692	2.62683	1.63506	1.77607	1.2467	0.27431	1.39555	1.64949	0.089879	2.13295	1.8475	0.46359	0.734424	1.78299	0.467412	1.85954	2.72525
Human_newGene_36936	Human_newGene_36936	1.16791	0.390648	1.21322	0.174417	0.4943	0.532695	0.222378	1.16884	0.507556	1.14569	1.83932	0.662047	2.21843	1.173	1.20768	1.67744	1.08869	0.879533	1.21244
Human_newGene_9142	Human_newGene_9142	0.393791	0.127434	0.066371	0.153483	0.580741	0	0.135837	0	0.095468	0.083381	0.03478	0	0.37089	0.049772	0	0.390232	0.327302	0.162852	0
ENSG00000254852	NPIPA2	0.269092	0.255288	0.250522	0.235114	1.19716	1.40328	0.056136	0	0.171041	0.501925	0.110499	0.093583	0.695829	1.18623	1.27624	1.31755	0	0.882331	0.285972
ENSG00000007402	CACNA2D2	1.06491	1.01368	0.962069	0.944324	1.17126	0.945059	0.915556	5.089	5.2122	4.12533	5.17349	4.99549	3.40139	4.91064	5.42401	3.62057	5.37934	4.94141	4.83488
ENSG00000254858	MPV17L2	6.75552	7.74943	6.58481	3.60229	5.56263	7.27874	4.75275	5.89888	5.79789	6.91689	6.14889	5.53232	7.21371	6.45359	4.99501	6.76162	4.75042	5.85456	4.98567
Human_newGene_30571	Human_newGene_30571	0	0	0	0	0	0.103179	0	0	0.116036	0	0.220979	0.680177	0.089223	0.523222	0.092544	0.223282	0.33239	0	0.260172
Human_newGene_40017	Human_newGene_40017	0	0	0	0	0	0	0	0	0	0	0	0	0	0	0	0	0	0.404552	0
ENSG00000104967	NOVA2	2.82592	2.4192	0.41991	0.332936	2.81912	0.553037	0.238081	3.64135	0.899819	1.8625	3.41543	0.639442	0.864341	3.53797	1.14231	1.93201	3.42346	0.570851	0.422704
ENSG00000104964	AES	109.729	105.856	137.113	297.834	80.8397	195.751	314.139	79.049	192.78	135.344	121.556	206.617	173.696	116.997	166.095	143.037	128.741	203.103	196.869
ENSG00000104960	PTOV1	45.3225	48.3611	82.4483	90.8011	46.1671	79.0158	100.902	50.4417	82.2066	67.8664	47.7648	86.9176	85.4773	49.0187	72.4129	69.1917	50.4509	86.1879	97.2802
Human_newGene_8439	Human_newGene_8439	0	0	0	0	0	0	0	0	0	0	0	0	0	0	0	0	0	0.458492	0
ENSG00000054523	KIF1B	13.372	13.2609	3.28799	3.88941	13.1459	3.44044	3.17265	19.3221	4.90007	8.66539	14.8365	3.70577	3.50673	18.1575	5.75235	9.29813	14.1606	3.3028	3.34275
ENSG00000239264	TXNDC5	93.1106	93.6283	131.406	171.853	49.1613	66.1424	158.197	86.68	141.648	66.1088	92.9077	73.5459	146.436	41.021	140.959	160.818	95.4727	138.191	172.478
ENSG00000106524	ANKMY2	4.03352	3.26395	2.76814	1.45021	4.07528	2.26566	1.929	5.56352	2.67375	4.02227	5.39944	2.41052	2.18536	5.3996	3.25698	3.65157	4.52012	2.09732	2.36904
ENSG00000155868	MED7	8.11022	8.53014	3.00697	2.64348	9.58101	3.47506	1.98439	8.0519	3.10499	4.88752	9.83123	3.25389	2.98893	8.22789	4.34713	4.98562	8.90362	2.86719	2.6562
ENSG00000106526	ACTR3C	0	0	0	0	0.040033	0.04285	0	0.008382	0	0.06078	0.066801	0	0	0	0.008807	0	0.009214	0	0
ENSG00000008988	RPS20	555.242	482.575	1571.13	2355.8	582.297	1532.71	2650.58	670.738	1665.52	1838.71	634.412	1702.06	2475.75	676.002	1478.43	1918	516.142	1916.16	2643.33
Human_newGene_4093	Human_newGene_4093	0.854741	1.40808	1.17689	0.407157	1.85186	1.71152	1.36592	3.62485	2.00673	2.1708	4.55382	4.82946	1.47583	3.33815	2.99369	2.40382	4.37601	3.97037	2.93623
Human_newGene_4092	Human_newGene_4092	6.64787	5.31165	7.05971	3.75534	6.31645	5.14215	3.95488	11.3732	8.20259	7.98854	11.2655	9.57915	8.09214	15.3942	7.30593	10.4084	8.27714	9.40181	7.49025
ENSG00000180919	OR56B4	0.116196	0.080704	0.091794	0	0.256238	0	0	0	0	0	0	0	0	0.044593	0	0	0.045567	0	0.080603
ENSG00000180917	CMTR2	7.53423	7.24363	3.52119	2.7686	7.75432	3.66446	1.53034	6.85682	3.47511	4.69143	5.70776	2.51389	2.6733	7.22255	4.03986	4.17703	6.87306	2.6124	2.10797
ENSG00000180914	OXTR	0.547979	0.781593	0.404823	0.796204	0.529763	0.370346	0.30007	0.472733	0.493104	0.445858	0.458014	0.380755	0.139237	0.437826	0.405054	0.293422	0.610265	0.385558	0.283311
Human_newGene_617	Human_newGene_617	0.073011	0.182441	3.4498	1.06756	0.721143	1.47064	1.35554	0.214618	1.50079	1.30288	0.220495	1.14046	1.42444	0.28411	1.46538	2.05156	0.143403	1.46269	1.16551
Human_newGene_15720	Human_newGene_15720	3.81853	3.86329	2.24981	2.32376	3.74331	2.88157	2.08099	3.53244	1.93943	2.14488	3.2365	1.48999	1.82115	3.93362	1.94271	3.05316	3.75514	1.90021	1.29602
ENSG00000160551	TAOK1	22.1752	21.436	4.40271	5.41611	21.1124	4.41035	4.96746	25.1083	5.16775	14.8914	22.0885	3.53181	3.56355	23.8114	10.1842	15.2144	16.8469	3.9952	5.38854
ENSG00000124479	NDP	0	0	0	0	0.02687	0	0	0	0	0	0.054853	0.028082	0.027794	0.028026	0	0	0	0.073164	0
ENSG00000012983	MAP4K5	19.3883	18.5426	12.1125	10.4178	17.9393	11.7901	9.86508	17.9356	13.0074	11.7169	17.7432	9.93855	7.24251	17.0002	11.7761	13.2509	15.8251	9.84316	8.25306
ENSG00000152076	CCDC74B	15.1511	16.419	23.8484	23.7706	16.7982	23.4283	24.6793	18.329	27.1781	17.254	17.8389	21.823	20.4849	18.84	29.3463	19.02	20.9302	26.6756	22.7501
ENSG00000169174	PCSK9	0	0	0	0.012855	0	0.014111	0.016262	0.02819	0	0	0	0.014153	0.028016	0	0	0.014509	0.01514	0.024582	0.012765
ENSG00000213316	LTC4S	0.07169	0.048502	0.076135	0.336824	0.097374	0.174723	0	0.05406	0.178241	0.179537	0.181427	0.050515	0	0.262924	0.105731	0	0.082736	0.140112	0.210339
ENSG00000156983	BRPF1	12.3014	11.9873	4.41961	3.97601	13.7235	4.43994	3.15037	13.5908	6.88038	7.90403	13.3519	4.02086	6.60109	13.1244	6.8767	7.78058	14.7823	4.19474	4.98943
ENSG00000095261	PSMD5	14.7179	15.1568	8.79765	6.0562	14.1823	7.65053	4.79918	13.6832	6.44239	8.11738	13.6615	5.74632	5.08676	13.638	7.8663	6.54641	13.4144	6.64721	4.06414
Human_newGene_12189	Human_newGene_12189	1.00678	0.929678	0.711332	0.716923	0.785469	0.691313	0.410883	0.83627	1.15117	0.788351	1.07639	0.68869	0.60083	1.11196	0.798082	0.642985	0.876622	0.58695	0.54023
ENSG00000123297	TSFM	16.1127	10.9189	13.8121	10.7819	20.7657	10.8938	11.1954	11.5154	15.2218	6.82971	10.8729	8.00579	10.5332	20.3782	9.82293	7.9566	11.6564	7.77813	5.77738
Human_newGene_12181	Human_newGene_12181	0	0	0	0.495661	0	0	0	0	0	0	0	0	0	0	0	0.145887	0	0	0.333185
ENSG00000091947	TMEM101	17.0164	19.7415	14.154	11.4547	19.6597	14.805	12.0264	15.4232	18.4741	18.9057	19.0315	12.8999	22.9986	17.589	18.3533	22.8468	12.6091	15.5901	17.0631
ENSG00000047597	XK	0.524257	0.453606	0.299301	0.16676	0.556945	0.170332	0.215507	0.333652	0.216072	0.19213	0.279336	0.156363	0.092785	0.409948	0.192504	0.219494	0.359124	0.167034	0.160681
ENSG00000128965	CHAC1	3.94732	3.60464	6.52616	1.13043	4.01404	6.33827	1.33915	2.66766	1.64607	1.18532	2.88041	3.64239	1.6387	2.46608	1.26314	1.05361	2.17972	2.95028	1.43396
ENSG00000157168	NRG1	0.494873	0.102227	0.070998	0.301638	0.075299	0.012852	0.549317	0.027347	0.183263	0.025301	0.005266	0.008679	0.005294	0.118423	0.076476	0	0.102197	0.015074	0
ENSG00000123124	WWP1	21.58	20.3708	5.84204	3.37946	21.587	6.1458	4.42529	26.063	4.66948	9.82208	20.169	4.99606	5.32582	20.0786	6.54207	10.7592	18.7256	4.39708	4.37589
ENSG00000113140	SPARC	152.44	158.052	166.823	149.319	149.212	159.613	147.759	149.874	202.31	176.333	148.937	186.881	168.265	148.4	190.602	180.556	161.832	186.109	183.526
ENSG00000184113	CLDN5	1.65948	0.994761	1.77778	0.938575	1.26805	0.731285	0.63901	0.62036	0.425826	0.490507	0.462298	0.593415	0.444296	0.550867	0.97152	0.869776	0.638268	0.344138	0.34425
ENSG00000184110	EIF3C	133.632	137.016	172.597	215.213	131.841	169.267	219.138	122.496	158.634	160.313	119.845	170.912	171.91	117.73	155.758	149.14	124.066	157.596	205.494
ENSG00000184117	NIPSNAP1	15.3618	16.8829	23.8791	45.3226	16.0389	21.5337	21.5513	19.823	52.1728	16.2709	42.211	25.7498	17.7211	19.5326	21.4314	17.2996	20.4487	25.1795	22.0666
ENSG00000168229	PTGDR	0	0	0	0	0	0	0	0	0	0	0	0	0	0	0.017053	0	0	0	0
ENSG00000168228	ZCCHC4	2.96463	3.62425	2.65694	1.94706	2.77749	2.33717	2.24994	3.00003	1.99383	2.62034	2.89666	1.72097	2.33815	4.10164	2.17662	2.10585	2.9586	2.14828	2.11724
ENSG00000163235	TGFA	1.74067	2.03709	1.3366	1.99023	1.78662	0.826907	1.19173	5.14479	2.70901	6.26291	6.12941	2.72987	7.57507	7.23747	3.44747	8.30984	7.99525	2.47868	4.19837
ENSG00000166049	PASD1	21.5805	20.7919	23.8105	25.4291	21.893	23.4828	24.109	24.5304	22.0911	19.5715	23.2549	24.3285	18.6046	23.638	21.4284	20.0759	25.3942	23.4199	20.5708
ENSG00000162545	CAMK2N1	9.41841	8.74213	7.59812	6.49803	8.41788	6.05046	5.01577	12.4101	9.65707	12.2301	9.83704	7.13675	10.1874	11.6166	10.1079	12.6724	8.44638	7.10151	6.60942
ENSG00000166046	TCP11L2	1.21758	1.14895	0.316822	0.437309	1.32831	0.564867	0.213379	1.83211	0.797817	1.19589	1.23084	0.481713	1.57618	1.62505	1.24411	2.17049	1.89745	0.662442	0.859542
ENSG00000162542	TMCO4	1.95739	2.16091	1.30185	0.507865	1.65315	1.41647	0.682163	2.11155	1.05539	1.50103	2.10932	0.752331	0.993709	1.65366	0.983042	1.02058	2.28127	1.11852	0.684684
ENSG00000162543	UBXN10	0	0	0	0	0	0	0	0	0	0	0	0	0	0	0	0	0.009884	0	0
ENSG00000284609	OR8B3	0	0	0	0	0	0	0	0	0	0	0	0	0	0	0	0	0	0	0
ENSG00000204010	IFIT1B	0	0	0	0.026587	0	0	0	0	0	0	0	0	0	0	0	0	0	0	0
ENSG00000204019	CT83	2.09813	2.57547	5.76717	8.39172	4.24097	5.23346	7.29276	3.45481	4.90151	5.59951	5.28873	6.35443	4.34321	3.31505	5.82613	4.77991	2.79602	5.86957	5.82094
Human_newGene_16400	Human_newGene_16400	0.86462	0.987801	0.10561	0.467183	0.774516	0.140818	0.306272	0.420479	0.22729	0.304529	0.584655	0.204663	0.26344	1.07714	0.438178	0.646947	0.660064	0.133303	0.232267
Human_newGene_16406	Human_newGene_16406	0.441136	0.507153	0.263306	0.310929	0.284608	0.330301	0.135693	0.697951	0.852625	0.846894	0.531071	0.421592	1.5955	1.0384	1.12441	0.58752	0.59364	0.792673	0.397742
Human_newGene_16407	Human_newGene_16407	0.508733	0.071235	0	0.011844	0.276297	0	0	0.276155	0	0.350146	0.149385	0	0	0.232097	0.098447	0.173509	0.004561	0	0.069921
Human_newGene_27561	Human_newGene_27561	2.35752	1.48668	2.38126	2.91072	2.75516	2.18144	1.7801	1.18921	1.03069	1.25588	1.35409	1.33189	1.05614	0.983329	1.17312	1.51329	1.42741	1.72001	1.56163
ENSG00000184434	LRRC19	0	0.030498	0.01465	0.088458	0.040896	0.086769	0	0.038727	0	0.047969	0	0.037526	0.014117	0	0.013902	0.050029	0.029446	0.024773	0
ENSG00000254087	LYN	4.51402	4.15713	2.13792	1.48884	3.82452	1.68797	1.21739	5.74502	1.10768	2.25762	4.67446	0.630932	1.07769	2.5879	1.8224	1.77193	2.91179	0.998317	0.507854
ENSG00000283654	LMLN2	0	0	0.01412	0.033623	0	0.050201	0.028202	0	0.034086	0.018272	0	0.023227	0.019374	0	0	0.01246	0	0.010764	0
ENSG00000158113	LRRC43	0.044269	0.013688	0.086431	0	0.015723	0	0.23188	0.025652	0.127723	0.221716	0.040191	0.134807	0	0	0.19721	0.222999	0.023849	0	0.18235
ENSG00000137776	SLTM	35.8939	37.2501	24.7939	16.3776	30.0141	24.8153	16.3213	40.0175	21.9261	22.546	37.9471	19.8774	15.0232	40.6348	21.8358	29.3347	39.4542	26.5696	16.0542
ENSG00000137770	CTDSPL2	7.11486	4.47997	2.38025	2.16698	7.38972	2.20025	2.00517	5.7149	3.12762	4.3582	8.60513	2.78512	2.01723	5.66854	3.82944	2.90848	5.5454	3.59378	2.14561
ENSG00000130204	TOMM40	45.2123	54.7887	84.3786	33.8112	43.5729	61.5949	42.0535	35.9968	35.623	29.1097	34.0281	39.4548	28.9448	41.8764	26.2316	28.359	31.2226	45.1508	28.046
ENSG00000130202	NECTIN2	38.9447	40.5238	33.1755	25.5559	40.2435	31.5492	23.6301	42.2798	33.8151	31.052	41.5636	33.5442	27.213	41.2072	29.8388	30.5579	45.5358	33.834	28.0436
ENSG00000130203	APOE	0.63162	0.597921	2.13685	3.96522	0.8912	1.83583	4.21974	1.25455	4.38371	6.84963	1.14383	3.57761	10.2427	1.29112	5.48003	5.76569	0.814781	3.93742	8.72291
ENSG00000011275	RNF216	38.2767	33.9939	17.1681	13.5458	39.5747	15.723	9.5933	30.1574	12.4947	17.6055	29.8271	12.6995	10.8472	29.4961	13.2037	18.4421	32.7216	12.8339	9.2582
ENSG00000157837	SPPL3	9.56426	8.97461	3.08831	2.25612	8.05858	3.22187	1.76444	8.33266	2.2029	4.73744	8.43527	1.65178	2.80478	8.30053	3.62232	5.05479	8.33276	1.94778	1.65634
ENSG00000130208	APOC1	0.848023	0.616719	3.39595	2.90946	0.740072	2.69252	1.88826	2.25505	2.07451	2.58611	1.05256	2.8078	3.61101	1.27206	2.27131	3.00651	1.11795	2.26953	3.35761
ENSG00000157833	GAREM2	11.0672	11.5603	8.27835	6.58028	11.4569	8.40498	6.17805	13.1464	11.2952	11.929	13.8374	8.13838	8.25247	13.8846	10.6759	11.651	13.235	9.89568	7.58976
ENSG00000168522	FNTA	13.2101	11.3825	7.93398	5.14785	10.6184	7.58406	4.9349	13.5065	7.76262	9.34746	13.3162	6.93819	10.7604	13.5035	9.81504	9.92333	12.5985	7.36911	6.31527
ENSG00000165533	TTC8	4.50207	6.51301	4.57947	1.89298	2.7927	3.25905	0.993037	7.22246	3.74504	1.86168	6.74035	1.35849	1.49639	6.28839	4.80097	4.8686	7.70325	1.24493	1.13178
Human_newGene_13633	Human_newGene_13633	0.194019	0.243712	0.047434	0.013542	0.360856	0	0	0.508629	0.026248	0.135262	0.354468	0.093445	0.088935	0.515994	0.140045	0.119497	0.148143	0.095142	0.046234
Human_newGene_13634	Human_newGene_13634	0.162609	0.202559	0.06463	0.03445	0.088867	0.251525	0.09216	0.388492	0.235659	0.076661	0.315122	0.061904	0.208773	0.58845	0.148546	0.289265	0.55042	0.204026	0.113938
Human_newGene_5254	Human_newGene_5254	0	0.636213	0.20871	0	0.113072	0	0.384962	0.265754	0.106851	0	0.29651	0.270917	0	0.473153	0	0.117188	0.56524	0.114502	0.12177
ENSG00000161091	MFSD12	45.6279	43.446	50.2982	40.4635	44.4718	50.5894	44.023	37.2246	34.8889	34.7071	36.1601	34.3486	34.0915	32.9744	34.7951	32.1282	37.0942	34.2739	29.8139
ENSG00000171476	HOPX	0	0	0	0	0	0	0	0	0	0	0	0	0	0	0	0	0	0	0
Human_newGene_11671	Human_newGene_11671	0.330402	0.595323	0.560433	0.231944	0.114568	0.565017	0.489419	0.583969	0.608166	0.358733	0.3576	0.624115	0.409195	0.218307	0.582113	0.403717	0.463219	0.637169	0.51042
Human_newGene_11672	Human_newGene_11672	12.3546	12.9637	9.02802	11.6282	13.117	9.36171	11.0092	8.47348	9.29363	11.7935	9.57076	6.50263	6.62672	8.71978	9.06111	11.1003	11.2415	6.10635	9.10927
Human_newGene_26217	Human_newGene_26217	0.245038	0.90046	0.159497	0.158686	0.312084	0.07301	0	0.205276	0.160027	0.087475	0.257104	0.228518	0	0.307756	0.265273	0.080293	0.371314	0.471977	0
Human_newGene_38543	Human_newGene_38543	0.37946	0.269993	0.123922	0.232599	0	0.163099	0	0.079649	0.088115	0.172091	0.194894	0.032708	0	0	0.235177	0	0.034414	0.108903	0
Human_newGene_38542	Human_newGene_38542	0.527811	0.567907	0.414674	0.049061	0.370683	0.290891	0.038741	0.063193	0.119675	0.165291	0.249526	0.154498	0.087745	0.257826	0.22975	0.344565	0.357068	0.243101	0.029532
ENSG00000121381	TAS2R9	0	0	0	0	0	0	0	0	0	0	0	0	0	0	0	0	0	0	0
ENSG00000121380	BCL2L14	0.188176	0.018855	0.105255	0.096617	0.128268	0.095352	0.041211	0.107729	0.041486	0.044386	0.066859	0.083226	0.018552	0.097269	0.037217	0.197169	0.046093	0.023926	0.02223
ENSG00000178381	ZFAND2A	12.6378	12.1262	15.437	12.6427	10.8725	17.9305	12.1918	12.5115	15.1844	13.9916	11.3609	15.6736	16.089	13.8315	14.976	15.402	10.5539	14.691	18.0251
ENSG00000042429	MED17	10.1147	6.63044	1.09163	1.75617	7.92758	1.44769	1.45366	9.11514	1.10367	5.46669	5.24548	0.91739	2.78625	6.30237	2.41391	4.947	7.03146	0.752264	1.95731
ENSG00000178385	PLEKHM3	1.78801	1.86298	0.432652	0.545624	1.8039	0.465639	0.351433	2.36025	0.637667	0.821678	2.24875	0.323187	0.427974	2.27281	0.807022	0.964296	2.20283	0.405866	0.254202
ENSG00000178386	ZNF223	1.20136	0.709474	0.303435	0.355312	1.01606	0.377704	0.201145	1.75299	1.09257	0.81172	1.45032	0.550294	0.494887	1.25547	1.06834	0.621753	0.985806	0.663229	0.621005
ENSG00000171867	PRNP	52.9754	13.0457	31.4503	51.191	33.127	48.025	31.0811	47.252	55.0231	55.1702	28.0591	37.4622	55.8349	32.0379	57.9945	33.1738	38.4527	37.8601	63.7613
ENSG00000171865	RNASEH1	23.1168	21.5025	22.4965	20.5306	20.0644	23.9814	20.3111	18.0476	19.8044	16.3418	18.141	20.0352	16.1649	18.7475	18.4044	15.8677	18.2967	21.0563	17.0096
ENSG00000171864	PRND	0	0.035157	0	0	0	0	0	0	0.014028	0	0	0	0	0.012907	0	0	0	0	0
ENSG00000171863	RPS7	342.393	298.646	661.182	496.233	347.698	491.915	464.649	294.805	677.578	381.831	377.779	599.83	559.9	362.929	680.406	389.491	350.329	736.872	684.918
ENSG00000171862	PTEN	6.24936	6.02863	2.80269	1.9888	5.60451	3.40898	1.56846	6.63929	3.4349	3.81859	6.03176	2.33938	2.60269	7.01737	3.74393	4.08868	6.92151	2.53641	1.82752
ENSG00000171861	MRM3	10.3547	9.72641	4.25508	3.27842	9.88352	6.59502	3.50842	6.76108	5.18633	5.71966	7.6892	4.38985	7.43649	7.43641	4.8139	5.56835	7.73447	3.87806	3.9235
ENSG00000171860	C3AR1	0.103281	0.446455	0.227902	0.21514	0.419007	0.369108	0.311588	0.156572	0.444378	0.436357	0.649838	0.123262	0.2318	0.615155	0.584848	0.675182	0.845109	0.31215	0.133264
ENSG00000041880	PARP3	6.52951	6.24033	8.29358	8.94387	5.76489	6.51981	9.3554	5.31412	8.98838	7.90033	5.44271	8.50255	8.79103	6.31165	9.26052	8.70907	6.46966	8.07688	7.57576
Human_newGene_11097	Human_newGene_11097	0	0.30817	0.058879	0	0	0.045253	0	0.62385	0.084988	0	0.471753	0.057321	0	0.245768	0.05587	0.078664	0.289456	0.049781	0
Human_newGene_25892	Human_newGene_25892	0	0	0	0	0.308462	0	0	0	0	0	0	0.182355	0	0	0	0.188156	0	0.303559	0
ENSG00000174989	FBXW8	5.39248	5.17141	3.59666	3.15016	4.84683	3.49002	2.99759	4.50337	3.42304	2.80484	4.24997	2.75693	2.43133	4.44397	3.45598	2.8096	4.50883	2.73083	2.40723
Human_newGene_38092	Human_newGene_38092	0	0	0.975828	0.118344	0.254619	0.128125	0.152393	0.32521	0.255968	0.340108	0.303731	0.566429	0.331001	0.383995	0.066116	0.400915	0.372143	0.097078	1.13696
ENSG00000134453	RBM17	36.096	34.4009	24.8478	11.969	31.3253	24.3033	14.7283	33.0051	16.3546	20.3432	31.4236	16.9977	18.7666	33.848	18.1039	20.7014	31.7191	17.8906	12.3326
ENSG00000134452	FBH1	18.7982	17.3129	12.3319	8.82386	18.8529	13.4772	8.19747	17.3727	9.77788	12.5364	18.167	9.65571	9.25005	16.7103	10.566	12.6215	18.245	10.3289	9.00485
ENSG00000124802	EEF1E1	12.9023	10.1457	9.94955	8.05385	11.9653	10.9467	11.0158	9.35214	6.62817	7.29735	14.7433	7.65963	4.77137	11.9193	7.47025	6.86484	13.3443	7.22822	5.40123
ENSG00000161328	LRRC56	0.062367	0.08422	0.04345	0.012321	0.13198	0.057609	0.152086	0.146632	0.092801	0.279088	0.125455	0.092947	0.148543	0.064932	0.147335	0.172145	0.136384	0.047786	0.123963
Human_newGene_29792	Human_newGene_29792	0.668466	0.285125	0.634479	0.411949	0	0.241714	0.105558	0.142254	0.519604	0.288484	0.301636	0.522963	0.211926	0	0.40764	0.465383	0.150276	0.229094	0.438804
Human_newGene_8372	Human_newGene_8372	0	0.215931	0	0	0	0	0	0.258903	0.074595	0.098141	0.066498	0.037972	0	0.084259	0.365001	0	0.247881	0	0
Human_newGene_8376	Human_newGene_8376	0	0.906498	0.41669	0	0.258769	0.251057	0.102546	0	0	0	0.089443	0.086241	0	0.179933	0.259788	0	0.526844	0.20877	0
Human_newGene_35112	Human_newGene_35112	0.287571	0.390024	0.3925	0.266412	0.354821	0.282882	0.601068	0.243293	0.686198	0.26653	0.264534	0.160707	0.241619	0.382613	0.39883	0.681405	0.17516	0.388879	0.419399
ENSG00000243317	STMP1	13.6925	13.5375	17.1999	18.8126	14.0405	17.5316	17.7167	16.2947	13.9373	17.1602	15.7963	14.8494	18.3938	16.0803	18.8075	16.7482	14.3351	18.3621	18.0499
ENSG00000215045	GRID2IP	0.041472	0.35993	0.301001	0.196606	0.328181	0.099805	0.222716	0.728987	0.50052	0.526808	1.2039	0.433405	0.508606	0.74597	0.483544	0.530772	0.99325	0.498587	0.435894
ENSG00000160050	CCDC28B	3.93545	3.1283	2.21457	0.953497	2.8153	2.92294	1.21116	4.09551	4.20079	4.46537	3.83841	4.20325	2.41564	3.75721	4.0961	2.9435	4.24493	3.60385	2.97453
ENSG00000160051	IQCC	4.20067	4.0503	2.23457	1.47672	3.63336	2.03334	1.37366	5.30715	2.43065	2.90203	4.55555	1.88325	1.5411	5.0564	2.72072	3.42222	5.17095	1.85182	1.12278
ENSG00000215041	NEURL4	6.95046	7.12394	4.51928	3.0149	7.2483	4.80243	3.01326	4.57209	4.18914	6.13084	5.30118	3.15089	4.58438	3.76613	4.77177	5.74572	4.94779	3.26734	3.10156
ENSG00000042286	AIFM2	15.678	14.7392	14.8676	9.60436	14.8771	14.4936	10.3779	11.4992	7.9771	8.88128	11.9826	9.03253	7.51018	11.5127	9.83424	8.90835	12.2731	10.0038	7.14518
Human_newGene_558	Human_newGene_558	63.9713	66.1081	121.892	133.87	64.7267	141.836	167.151	85.4327	214.978	189.888	99.8929	199.225	266.529	97.9042	173.42	186.896	95.9209	249.567	279.001
ENSG00000285385	AC098582.1	0.031993	0	0	0	0	0	0	0	0	0	0	0.071286	0	0	0	0	0	0	0
ENSG00000285382	FO393400.1	0.074579	0.151557	0.109232	0	0.146579	0.064957	0.042367	0.356458	0.15893	0.176979	0.157319	0.083837	0.160351	0.157454	0.087021	0.035007	0.258648	0.057774	0.070453
Human_newGene_1967	Human_newGene_1967	0	0	0	0	0	0	0	0.427908	0	0	0	0	0	0	0	0	0	0	0
ENSG00000175581	MRPL48	15.1091	14.8244	21.8462	22.4601	13.2978	19.9304	26.8703	13.5834	18.3754	14.6896	13.8575	20.1267	17.6345	15.668	19.0301	14.6302	13.6552	21.4398	18.8176
ENSG00000175582	RAB6A	19.7508	20.591	16.6703	15.3308	19.2551	16.879	13.0805	20.5967	13.4865	16.0703	20.9812	15.2222	13.9252	21.5614	16.5353	16.8519	17.1145	16.256	12.39
Human_newGene_7498	Human_newGene_7498	1.15597	1.06691	0.778893	0.660806	0.912385	1.06496	0.771651	0.798937	0.826247	0.904175	0.737934	1.31652	0.838269	0.833916	0.626596	0.825337	0.836886	1.07045	0.780765
Human_newGene_7496	Human_newGene_7496	0.479237	0.246738	0.212855	0.202692	0.374502	0.613082	0.027044	0.267835	0.345712	0.38082	0.129821	0.558928	0.077448	0.251207	0.349587	0.110529	0.08888	0.271301	0.352134
Human_newGene_7497	Human_newGene_7497	0.935795	1.68965	1.14344	0.759784	1.35074	0.787676	1.20674	1.16214	0.750432	0.881698	1.10399	1.2364	0.39472	0.983176	0.635708	0.656896	1.21802	0.935866	0.857392
ENSG00000036530	CYP46A1	0.061485	0.050541	0.031633	0.0085	0.075199	0.039485	0.008949	0.083436	0.025599	0.104306	0.070571	0.026063	0.010763	0.195159	0.113708	0.037792	0.097521	0.059715	0.038239
ENSG00000177984	LCN15	0	0	0.079947	0.035943	0	0	0.169749	0.044292	0.069567	0.150908	0.041107	0	0	0.032678	0	0.069249	0	0	0
ENSG00000065989	PDE4A	6.14959	6.63583	2.70234	2.67887	5.88348	3.23767	1.48207	5.87093	2.40172	4.668	5.21576	1.82679	2.1994	5.72814	3.27505	4.45125	7.80626	1.68029	2.97987
ENSG00000177981	ASB8	6.0388	6.46621	3.67699	2.51052	7.21214	3.80797	2.21198	6.7721	3.6638	3.81069	5.87796	3.4757	3.94185	7.17963	4.48872	4.20611	5.15454	3.43725	2.47657
ENSG00000177989	ODF3B	0.264092	0.109719	0.08984	0.069005	0	0.035876	0	0.168518	0.126347	0.367853	0.024541	0.208892	0.190231	0.131177	0.263624	0.359284	0.177169	0.222687	0.262242
Human_newGene_23498	Human_newGene_23498	0	0	0.60279	0	0	0	0.38531	0	0	0	0	0	0.082976	0	0.172652	0.066924	0	0	0.147953
ENSG00000175634	RPS6KB2	22.9043	21.7463	43.1141	54.2726	18.639	41.1639	58.7924	17.7535	37.7249	33.2186	17.3465	36.8698	38.5289	19.2833	35.6974	31.8722	20.2944	38.3821	42.2614
Human_newGene_23494	Human_newGene_23494	0	0.087088	0.351416	0.141746	0	0	0	0.312469	0.228777	0.067133	0.364044	0	0	0	0	0	0	0	0
ENSG00000135324	MRAP2	0.476045	0.320111	0.485265	0.162925	0.387598	0.217365	0.356391	0.276978	0.261319	0.20355	0.433767	0.292556	0.211392	0.613365	0.314355	0.187541	0.319432	0.407856	0.252515
Human_newGene_20217	Human_newGene_20217	0.455654	0.379784	0.306186	0.226235	0.370143	0.1921	0.57973	0.753949	0.748781	0.016077	1.32315	0.265734	0.351339	0.765405	0.602968	0.364515	1.0778	0.15774	0.204899
ENSG00000147400	CETN2	19.3855	17.3808	31.6509	42.1691	18.8265	30.9573	37.0293	18.1305	31.5283	30.9513	19.0698	30.6369	35.5528	19.6023	30.5328	31.6861	16.6103	29.0493	33.7764
ENSG00000147403	RPL10	384.326	365.158	788.515	985.498	397.976	815.231	1081.13	425.209	907.3	1129.53	464.596	990.242	1392.36	622.308	1116.41	883.297	460.706	1241.45	1370.68
ENSG00000147408	CSGALNACT1	0.089398	0.157589	0.024428	0.079643	0.132403	0.106143	0.041927	0.277655	0.139385	0.267988	0.326084	0.090939	0.192215	0.366305	0.120488	0.33331	0.374213	0.109433	0.065823
ENSG00000131668	BARX1	0.244992	0.091071	0	0.036644	0.104908	0.039449	0.057872	0.78916	0.240395	0.227209	0.798099	0.094825	0.40403	0.957913	0.469238	0.257071	0.650934	0.207199	0.075422
ENSG00000213265	TSGA13	0.001152	0.058331	0	0	0	0.000774	0	0	0	0	0.04846	0.010474	0	0.001259	0.029998	0.031873	0.021457	0.049069	0
ENSG00000221977	OR4E2	0	0	0	0	0	0	0	0	0	0	0	0	0	0	0	0	0	0	0
ENSG00000003137	CYP26B1	18.3369	15.0378	3.8036	6.05223	10.2295	5.43459	3.24012	18.3289	8.44569	13.2005	19.9964	7.82454	11.6719	22.3393	11.7028	11.8244	23.7022	7.82961	4.93747
ENSG00000221970	OR2A1	0	0	0	0	0	0	0	0	0	0	0	0	0	0.05506	0	0.011392	0	0	0
ENSG00000248099	INSL3	0	0.103243	0	0.062486	0	0.034564	0	0.085677	0	0.488297	0	0.171771	0.298666	0.057142	0.196943	0.088044	0.091874	0	0.206574
ENSG00000132313	MRPL35	18.9332	16.7801	31.0408	21.2869	22.0108	24.7128	21.9254	18.392	25.2114	21.694	17.954	25.1259	15.1987	27.1462	25.4903	18.6983	14.3878	22.7872	17.9308
ENSG00000221978	CCNL2	25.6385	28.113	21.6521	20.9571	28.5694	20.6468	23.6571	24.9904	31.0498	29.6961	23.2914	21.7751	23.1852	27.4403	27.1422	25.8106	26.8011	24.3437	24.6134
ENSG00000237763	AMY1A	0	0	0	0	0	0	0	0	0	0	0	0	0	0	0	0	0	0	0
ENSG00000177673	TEX44	0	0	0	0	0	0	0	0	0	0	0	0.035482	0	0	0	0	0	0	0
ENSG00000177674	AGTRAP	21.23	21.2316	45.7875	34.9631	25.9484	31.04	41.1031	20.3298	23.3057	22.6283	21.7001	21.6109	21.2258	22.6497	19.7316	20.0381	20.5389	29.2512	26.4854
ENSG00000177675	CD163L1	0.412814	0.321398	0.154834	0.214309	0.537935	0.189242	0.16652	0.1484	0.150099	0.165063	0.349677	0.189434	0.109646	0.091376	0.081643	0.231588	0.238832	0.245171	0.023177
ENSG00000237765	FAM200B	10.1333	10.1985	9.11465	5.01208	5.88016	9.22534	5.19025	5.87011	3.82625	5.07371	6.31756	4.00818	4.83549	6.06772	5.30786	5.07921	6.91819	4.78316	3.91163
ENSG00000177679	SRRM3	3.97733	3.01699	1.45797	1.04402	3.21584	1.92237	1.60509	4.60791	3.02046	2.60411	4.20401	1.828	1.77036	4.39481	3.04248	2.96884	4.19902	2.2569	1.27168
ENSG00000272196	HIST2H2AA4	21.3565	20.8086	49.8506	71.4204	21.1631	60.8086	93.3278	12.4459	22.4701	30.2347	13.4408	38.7921	66.645	10.5458	21.6982	31.9226	14.7142	37.8817	61.0047
ENSG00000172009	THOP1	16.43	18.7183	20.3519	14.1788	17.6599	18.9033	14.6591	13.2929	11.3545	11.042	13.5504	10.3066	9.6708	13.7372	10.3871	10.7956	13.5768	13.051	8.6949
ENSG00000172000	ZNF556	0.024664	0	0	0	0.033689	0.007939	0	0.095943	0.146951	0.36201	0.075172	0.062248	0.073391	0.123804	0.106793	0.115485	0.108193	0.032455	0.024671
ENSG00000172005	MAL	0.048604	0	0.094462	0.783013	0	0.046935	0.834166	0.174249	0.241397	0.295652	0.225896	0.231449	1.04933	0.131432	0	0.670828	0.185735	0.191206	1.17126
ENSG00000172006	ZNF554	0.400156	0.321509	0.344565	0.25651	0.700202	0.257525	0.248405	0.53783	0.679773	0.846202	0.513568	0.555891	1.35835	0.696398	0.799746	0.802407	0.630864	0.649257	0.908633
ENSG00000172007	RAB33B	2.10615	1.98693	0.786184	0.649997	2.18908	0.724949	0.708134	2.13504	1.06998	1.64502	2.95135	0.752292	1.02401	2.50417	1.5173	1.37711	2.29643	0.800414	0.828203
ENSG00000188277	C15orf62	0.764879	0.58193	0.251055	0.201076	0.574056	0.170302	0.050577	0.694475	0.159583	0.580062	0.467091	0.053067	0.40987	0.808856	0.359453	0.720195	0.814871	0.17265	0.355748
ENSG00000033122	LRRC7	0.221605	0.375166	0.040864	0.090559	0.583518	0.008021	0	0.219485	0.075054	0.159615	0.457847	0	0.021451	0.39102	0.118671	0.240036	0.358877	0.032114	0.026789
ENSG00000248329	APELA	0	0	0	0	0	0	0	0	0	0	0	0	0	0	0	0	0	0	0
ENSG00000069869	NEDD4	8.62072	8.90468	5.66711	4.98522	8.52593	5.76099	4.6303	10.1388	4.90962	5.87706	8.97606	4.78036	3.77773	9.52456	5.367	6.20264	8.88293	4.80172	3.94007
ENSG00000155252	PI4K2A	15.5539	15.614	6.40264	5.99011	16.6877	6.64433	4.44598	15.9746	5.95567	10.881	15.7411	4.56853	8.79471	15.3597	8.34361	11.5065	16.9544	5.15567	5.39719
ENSG00000259900	AC026464.1	0.149453	0	0	0.1363	0	0.231071	0	0	0	0	0	0	0	0	0.412817	0	0	0	0
ENSG00000115816	CEBPZ	34.7197	31.2177	15.367	10.5052	32.9982	15.0601	7.82941	34.1278	14.0573	20.7579	31.4162	12.6986	15.1504	35.846	18.036	20.6044	31.5777	11.833	10.8976
ENSG00000071991	CDH19	0	0	0	0	0	0	0	0	0	0	0	0	0	0	0	0	0	0	0
ENSG00000071994	PDCD2	18.0205	17.172	26.6577	25.1876	18.6962	23.8583	22.6058	16.9653	18.6545	15.0843	16.8676	18.9038	15.126	16.6427	17.6587	14.9293	16.1005	18.5693	16.023
ENSG00000118997	DNAH7	0.008722	0.0302	0.008532	0.004532	0.038308	0.008422	0	0.012429	0.048104	0.007982	0.008389	0.058947	0.028642	0.045423	0.010447	0.012885	0.045661	0.096248	0.007277
Human_newGene_6720	Human_newGene_6720	0.595221	0.77659	0.735968	0.583195	0.645668	0.556905	0.685688	1.50625	1.36536	1.26271	1.15599	0.957927	0.754614	1.4045	1.88391	1.15031	1.25339	1.34467	1.17534
Human_newGene_33519	Human_newGene_33519	1.14068	0.948579	0.490207	0.279226	0.916129	0.634028	0.434966	0.894443	0.975145	1.32511	1.11677	0.503955	0.770441	1.19739	0.943217	1.35241	0.768107	0.609053	0.698454
Human_newGene_33518	Human_newGene_33518	0	0	0.568637	0.43456	0	0.267289	0	0	0	0.255093	0	0	0	0	0	0	0	0	0
ENSG00000157429	ZNF19	0.837642	0.382466	0.279244	0.454348	0.395914	0.225847	0.342817	0.853596	0.249929	0.315739	0.409121	0.190163	0.428939	0.660075	0.296486	0.870446	0.546304	0.237024	0.33018
Human_newGene_37601	Human_newGene_37601	4.68659	4.70885	4.01328	2.64711	5.97103	3.4817	1.84936	4.61931	2.85582	3.74781	4.74451	3.1726	3.03542	5.67731	4.86587	2.72756	5.49973	3.36268	2.65242
ENSG00000138018	SELENOI	13.7304	13.4762	4.28088	5.09077	13.616	4.47104	3.51558	11.4429	4.22778	8.24637	10.3424	3.37909	4.13192	12.1666	6.03771	11.0939	9.65047	3.11453	3.84548
Human_newGene_37602	Human_newGene_37602	0.484805	0.294318	0.172363	0.270668	0.387936	0.442803	0.237308	0.553736	0.449593	0.375863	0.449451	0.221997	0.161881	0.564137	0.398949	0.487264	0.307277	0.298038	0.266518
ENSG00000271425	NBPF10	0.520131	1.57018	0.962426	1.3877	1.29465	0.753389	0.420045	1.13823	1.13929	1.24373	1.30147	1.26949	0.863456	1.11293	0.991266	1.09922	1.57807	0.848282	0.973034
ENSG00000146469	VIP	0.058037	0.206879	0.144866	0.353208	0.216025	0.485454	0.430882	0.313121	0.353765	0.156134	0	0.160749	0.445251	0.206428	0.165946	0.203031	0.1022	0.2666	0.452864
ENSG00000136144	RCBTB1	5.5411	4.72986	4.64637	5.55657	5.38323	4.45073	5.25156	7.02796	6.23773	6.35024	7.01862	6.8395	4.82329	6.7038	6.81243	6.11484	6.74022	6.27778	6.46255
[truncated: 23,434 more rows]
