# Supplementary material for: Chk1 Inhibition Hinders the Restoration of H3.1K56 and H3.3K56 Acetylation and Reprograms Gene Transcription After DNA Damage Repair
Source: Front Oncol. 2022 Apr 14;12:862592. doi: 10.3389/fonc.2022.862592 (PMC9046994; doi:10.3389/fonc.2022.862592)
Supplement: Supplementary Table 3 — Fold changes in genes detected in all samples. [file Table_3.xlsx]

## Sheet: BMK 2h DMSO vs 2h LY2606368
#ID	gene_name	T02_FPKM	T02_count	T05_FPKM	T05_count	T08_FPKM	T08_count	T11_FPKM	T11_count	T14_FPKM	T14_count	T17_FPKM	T17_count	Pvalue	log2FC	regulated	COG_class	COG_class_annotation	GO_annotation	KEGG_annotation	KEGG_pathway_annotation	KOG_class	KOG_class_annotation	Pfam_annotation	Swiss_Prot_annotation	eggNOG_class	eggNOG_class_annotation	NR_annotation	GO_second_level_annotation
ENSG00000267303	AC011511.4	5.66176	450	2.00825	151	5.29164	382	1.15287	85	6.08756	439	0.303828	21	5.20598e-06	-2.27964	down	--	--	Molecular Function: nucleotide binding (GO:0000166);; Biological Process: mRNA splicing, via spliceosome (GO:0000398);; Cellular Component: nucleus (GO:0005634);; Cellular Component: cytoplasm (GO:0005737);; Cellular Component: viral nucleocapsid (GO:0019013);; Cellular Component: intracellular ribonucleoprotein complex (GO:0030529);; Molecular Function: RNA binding (GO:0044822);;	--	--	--	--	--	Ribonucleoprotein PTB-binding 1 OS=Homo sapiens OX=9606 GN=RAVER1 PE=1 SV=1	--	--	T0092358 isoform 1, partial [Pan troglodytes]	cellular component: virion part (GO:0044423);; cellular component: virion (GO:0019012);; cellular component: macromolecular complex (GO:0032991);; cellular component: organelle (GO:0043226);; cellular component: cell part (GO:0044464);; cellular component: cell (GO:0005623);; biological process: cellular process (GO:0009987);; biological process: metabolic process (GO:0008152);; molecular functio…
Human_newGene_21240	--	1.98167	107	0.928758	47	1.73236	85	0.592699	31	1.41522	71	0.658395	31	0.00449591	-1.20987	down	--	--	--	--	--	--	--	--	--	--	--	PREDICTED: LOW QUALITY PROTEIN: translation initiation factor IF-2 [Pan paniscus]	--
Human_newGene_46119	--	1.47978	59	0.17703	6	1.25328	55	0.641943	38	1.30878	88	0.721265	39	0.0389777	-1.20692	down	--	--	--	--	--	--	--	--	--	--	--	PREDICTED: uncharacterized protein LOC109023574 [Gorilla gorilla gorilla]	--
Human_newGene_18022	--	1.39466	241	0.713577	125	1.02735	182	1.17025	191	1.79296	359	0.425692	70	0.0173953	-0.981684	down	--	--	Cellular Component: Golgi membrane (GO:0000139);; Cellular Component: extracellular space (GO:0005615);; Cellular Component: nucleus (GO:0005634);; Cellular Component: endoplasmic reticulum membrane (GO:0005789);; Cellular Component: cis-Golgi network (GO:0005801);; Biological Process: translation (GO:0006412);; Biological Process: signal peptide processing (GO:0006465);; Biological Process: prot…	--	--	--	--	--	Putative uncharacterized protein encoded by LINC00269 OS=Homo sapiens OX=9606 GN=LINC00269 PE=5 SV=1	--	--	similar to FKSG60, partial [Homo sapiens]	biological process: single-organism process (GO:0044699);; biological process: multicellular organismal process (GO:0032501);; biological process: developmental process (GO:0032502);; biological process: localization (GO:0051179);; biological process: biological regulation (GO:0065007);; biological process: metabolic process (GO:0008152);; biological process: cellular process (GO:0009987);; molec…
Human_newGene_954	--	2.14098	464	1.5317	270	2.65597	396	1.45888	279	2.51266	693	2.01989	303	0.00758564	-0.807594	down	--	--	Molecular Function: DNA binding (GO:0003677);; Cellular Component: nucleus (GO:0005634);; Biological Process: regulation of transcription, DNA-templated (GO:0006355);; Molecular Function: metal ion binding (GO:0046872);;	--	--	--	--	--	Putative uncharacterized protein encoded by LINC00269 OS=Homo sapiens OX=9606 GN=LINC00269 PE=5 SV=1	--	--	formin-like protein 3 [Aotus nancymaae]	biological process: biological regulation (GO:0065007);; molecular function: binding (GO:0005488);; cellular component: cell part (GO:0044464);; cellular component: organelle (GO:0043226);; cellular component: cell (GO:0005623);;
Human_newGene_22499	--	2.75932	337	1.48936	179	2.16195	248	1.09865	141	2.12241	240	1.6491	177	0.0427503	-0.662888	down	--	--	Cellular Component: Golgi membrane (GO:0000139);; Cellular Component: extracellular space (GO:0005615);; Cellular Component: nucleus (GO:0005634);; Cellular Component: mitochondrial inner membrane presequence translocase complex (GO:0005744);; Cellular Component: endoplasmic reticulum membrane (GO:0005789);; Cellular Component: cis-Golgi network (GO:0005801);; Biological Process: translation (GO:…	--	--	--	--	--	Putative uncharacterized protein encoded by LINC00269 OS=Homo sapiens OX=9606 GN=LINC00269 PE=5 SV=1	--	--	patient fukutin [Homo sapiens]	molecular function: transporter activity (GO:0005215);; molecular function: catalytic activity (GO:0003824);; biological process: localization (GO:0051179);; biological process: developmental process (GO:0032502);; biological process: single-organism process (GO:0044699);; biological process: multicellular organismal process (GO:0032501);; biological process: metabolic process (GO:0008152);; biol…
ENSG00000003989	SLC7A2	3.80438	1157	2.62175	513	2.89818	791	3.14798	422	3.42556	411	3.65662	408	0.0178702	-0.743764	down	[E]	Amino acid transport and metabolism	Biological Process: nitric oxide production involved in inflammatory response (GO:0002537);; Molecular Function: high-affinity arginine transmembrane transporter activity (GO:0005289);; Molecular Function: high-affinity lysine transmembrane transporter activity (GO:0005292);; Cellular Component: integral component of plasma membrane (GO:0005887);; Biological Process: cellular amino acid metabolic…	K13864|0|hsa:6542|K13864 solute carrier family 7 (cationic amino acid transporter), member 2 | (RefSeq) SLC7A2, ATRC2, CAT2, HCAT2; solute carrier family 7 member 2	--	[E]	Amino acid transport and metabolism	Amino acid permease;; Amino acid permease;; C-terminus of AA_permease	Cationic amino acid transporter 2 OS=Homo sapiens OX=9606 GN=SLC7A2 PE=1 SV=2	E	Amino acid transport and metabolism	cationic amino acid transporter 2 isoform 1 [Homo sapiens]	molecular function: transporter activity (GO:0005215);; biological process: biological regulation (GO:0065007);; biological process: metabolic process (GO:0008152);; biological process: cellular process (GO:0009987);; biological process: localization (GO:0051179);; biological process: single-organism process (GO:0044699);; biological process: multicellular organismal process (GO:0032501);; biolog…
ENSG00000175305	CCNE2	4.73191	533	2.67482	342	6.86487	825	5.27682	566	7.77163	797	4.7952	465	0.0343312	-0.598808	down	--	--	Biological Process: cell cycle checkpoint (GO:0000075);; Biological Process: regulation of cyclin-dependent protein serine/threonine kinase activity (GO:0000079);; Biological Process: G1/S transition of mitotic cell cycle (GO:0000082);; Cellular Component: nucleoplasm (GO:0005654);; Cellular Component: cytosol (GO:0005829);; Biological Process: DNA replication initiation (GO:0006270);; Molecular …	K06626|0|hsa:9134|K06626 cyclin E | (RefSeq) CCNE2, CYCE2; cyclin E2	Cell cycle (ko04110);; Oocyte meiosis (ko04114);; p53 signaling pathway (ko04115);; PI3K-Akt signaling pathway (ko04151);; Hepatitis B (ko05161);; Measles (ko05162);; Pathways in cancer (ko05200);; Viral carcinogenesis (ko05203);; MicroRNAs in cancer (ko05206);; Prostate cancer (ko05215);; Small cell lung cancer (ko05222)	[D]	Cell cycle control, cell division, chromosome partitioning	Cyclin, N-terminal domain;; Cyclin, C-terminal domain	G1/S-specific cyclin-E2 OS=Homo sapiens OX=9606 GN=CCNE2 PE=1 SV=1	D	Cell cycle control, cell division, chromosome partitioning	G1/S-specific cyclin-E2 [Homo sapiens]	molecular function: molecular function regulator (GO:0098772);; molecular function: binding (GO:0005488);; biological process: single-organism process (GO:0044699);; biological process: cellular process (GO:0009987);; biological process: metabolic process (GO:0008152);; biological process: biological regulation (GO:0065007);; cellular component: cell (GO:0005623);; cellular component: organelle p…
Human_newGene_9706	--	0.991159	88	0.601799	51	0.834504	68	0.103317	9	0.914412	74	0.548389	42	0.0437759	-1.09975	down	--	--	Molecular Function: ubiquitin-protein transferase activity (GO:0004842);; Molecular Function: guanyl-nucleotide exchange factor activity (GO:0005085);; Cellular Component: nucleus (GO:0005634);; Cellular Component: mitochondrial inner membrane (GO:0005743);; Cellular Component: centriole (GO:0005814);; Biological Process: DNA repair (GO:0006281);; Biological Process: intracellular protein transpo…	K10595|1.37088e-61|hsa:8924|K10595 E3 ubiquitin-protein ligase HERC2 [EC:2.3.2.26] | (RefSeq) HERC2, D15F37S1, MRT38, SHEP1, jdf2, p528; HECT and RLD domain containing E3 ubiquitin protein ligase 2	Ubiquitin mediated proteolysis (ko04120)	[S]	Function unknown	--	E3 ubiquitin-protein ligase HERC2 OS=Homo sapiens OX=9606 GN=HERC2 PE=1 SV=2	DZ	Cell cycle control, cell division, chromosome partitioning;; Cytoskeleton	HERC2 isoform 7, partial [Pan troglodytes]	molecular function: binding (GO:0005488);; molecular function: catalytic activity (GO:0003824);; molecular function: molecular function regulator (GO:0098772);; biological process: single-organism process (GO:0044699);; biological process: multicellular organismal process (GO:0032501);; biological process: reproduction (GO:0000003);; biological process: reproductive process (GO:0022414);; biologi…
ENSG00000160014	CALM3	169.031	16479	77.5322	6977	181.513	16102	73.5734	6540	187.04	16594	196.885	16237	0.0367459	-0.63603	down	[T]	Signal transduction mechanisms	Biological Process: G2/M transition of mitotic cell cycle (GO:0000086);; Biological Process: MAPK cascade (GO:0000165);; Cellular Component: spindle pole (GO:0000922);; Biological Process: response to amphetamine (GO:0001975);; Biological Process: regulation of heart rate (GO:0002027);; Biological Process: platelet degranulation (GO:0002576);; Molecular Function: phosphorylase kinase activity (GO…	--	--	[T]	Signal transduction mechanisms	EF hand;; EF-hand domain pair;; EF-hand domain pair;; EF-hand domain;; EF hand;; EF-hand domain;; Cytoskeletal-regulatory complex EF hand;; Secreted protein acidic and rich in cysteine Ca binding region;; EF-hand domain;; Ca2+ insensitive EF hand	Calmodulin-3 OS=Homo sapiens OX=9606 GN=CALM3 PE=1 SV=1	DTZ	Cell cycle control, cell division, chromosome partitioning;; Signal transduction mechanisms;; Cytoskeleton	calmodulin-3 isoform X1 [Papio anubis]	biological process: localization (GO:0051179);; biological process: response to stimulus (GO:0050896);; biological process: signaling (GO:0023052);; biological process: biological regulation (GO:0065007);; biological process: single-organism process (GO:0044699);; biological process: developmental process (GO:0032502);; biological process: cellular process (GO:0009987);; biological process: metab…
ENSG00000166532	RIMKLB	26.38	4107	20.3118	1978	38.6398	5614	32.6232	4150	38.4038	5533	25.2804	1860	0.00084602	-0.894486	down	[HJ]	Coenzyme transport and metabolism;; Translation, ribosomal structure and biogenesis	Molecular Function: ATP binding (GO:0005524);; Cellular Component: cytoplasm (GO:0005737);; Biological Process: cellular protein modification process (GO:0006464);; Molecular Function: metal ion binding (GO:0046872);; Molecular Function: N-acetyl-L-aspartate-L-glutamate ligase activity (GO:0072590);; Molecular Function: citrate-L-glutamate ligase activity (GO:0072591);;	K18310|0|hgl:101706744|K18310 beta-citrylglutamate/N-acetylaspartylglutamate synthase [EC:6.3.1.17 6.3.2.41] | (RefSeq) Rimklb; ribosomal modification protein rimK like family member B	Alanine, aspartate and glutamate metabolism (ko00250)	--	--	RimK-like ATP-grasp domain;; Prokaryotic glutathione synthetase, ATP-grasp domain;; ATP-grasp domain	Beta-citrylglutamate synthase B OS=Homo sapiens OX=9606 GN=RIMKLB PE=2 SV=2	HJ	Coenzyme transport and metabolism;; Translation, ribosomal structure and biogenesis	PREDICTED: beta-citrylglutamate synthase B isoform X1 [Pan troglodytes]	molecular function: catalytic activity (GO:0003824);; molecular function: binding (GO:0005488);; biological process: cellular process (GO:0009987);; biological process: metabolic process (GO:0008152);; cellular component: cell (GO:0005623);; cellular component: cell part (GO:0044464);;
ENSG00000137878	GCOM1	2.03916	321	1.46538	272	2.33251	381	1.60086	196	2.17808	349	1.75173	189	0.0398664	-0.628742	down	--	--	--	--	--	--	--	--	Myocardial zonula adherens protein OS=Homo sapiens OX=9606 GN=MYZAP PE=1 SV=1	Z	Cytoskeleton	GRINL1A combined protein Gcom10 precursor [Homo sapiens]	--
ENSG00000250264	AL669918.1	15.6655	1818	4.3651	480	2.18925	231	2.1124	228	2.57163	271	2.67672	263	0.0472759	-1.16329	down	[V]	Defense mechanisms	Biological Process: adaptive immune response (GO:0002250);; Biological Process: antigen processing and presentation of exogenous protein antigen via MHC class Ib, TAP-dependent (GO:0002481);; Biological Process: antigen processing and presentation of endogenous peptide antigen via MHC class I via ER pathway, TAP-dependent (GO:0002485);; Biological Process: antigen processing and presentation of e…	K05654|0|hsa:6891|K05654 ATP-binding cassette, subfamily B (MDR/TAP), member 3 | (RefSeq) TAP2, ABC18, ABCB3, APT2, D6S217E, PSF-2, PSF2, RING11; transporter 2, ATP binding cassette subfamily B member	ABC transporters (ko02010);; Phagosome (ko04145);; Antigen processing and presentation (ko04612);; Herpes simplex infection (ko05168);; Primary immunodeficiency (ko05340)	[U]	Intracellular trafficking, secretion, and vesicular transport	ABC transporter transmembrane region;; ABC transporter;; Immunoglobulin C1-set domain;; Class II histocompatibility antigen, beta domain	Antigen peptide transporter 2 OS=Homo sapiens OX=9606 GN=TAP2 PE=1 SV=1	V	Defense mechanisms	PREDICTED: LOW QUALITY PROTEIN: antigen peptide transporter 2 [Cebus capucinus imitator]	biological process: multi-organism process (GO:0051704);; biological process: biological regulation (GO:0065007);; biological process: localization (GO:0051179);; biological process: immune system process (GO:0002376);; biological process: single-organism process (GO:0044699);; biological process: response to stimulus (GO:0050896);; molecular function: catalytic activity (GO:0003824);; molecular …
ENSG00000143882	ATP6V1C2	2.60004	333	1.90255	240	4.46103	537	1.31435	149	3.11537	375	2.75381	305	0.0296582	-0.777212	down	--	--	--	K02148|0|pps:100995236|K02148 V-type H+-transporting ATPase subunit C | (RefSeq) ATP6V1C2; ATPase H+ transporting V1 subunit C2	Oxidative phosphorylation (ko00190);; Phagosome (ko04145);; mTOR signaling pathway (ko04150);; Synaptic vesicle cycle (ko04721);; Collecting duct acid secretion (ko04966);; Rheumatoid arthritis (ko05323)	[C]	Energy production and conversion	V-ATPase subunit C	V-type proton ATPase subunit C 2 OS=Homo sapiens OX=9606 GN=ATP6V1C2 PE=1 SV=2	C	Energy production and conversion	V-type proton ATPase subunit C 2 isoform b [Homo sapiens]	--
ENSG00000198431	TXNRD1	133.636	21476	95.3565	13827	181.217	26595	112.235	15945	178.321	25398	114.389	15174	0.000166698	-0.653875	down	[C]	Energy production and conversion	Biological Process: response to reactive oxygen species (GO:0000302);; Biological Process: mesoderm formation (GO:0001707);; Biological Process: selenium compound metabolic process (GO:0001887);; Molecular Function: thioredoxin-disulfide reductase activity (GO:0004791);; Molecular Function: protein binding (GO:0005515);; Cellular Component: nucleoplasm (GO:0005654);; Cellular Component: nucleolus…	K00384|0|hsa:7296|K00384 thioredoxin reductase (NADPH) [EC:1.8.1.9] | (RefSeq) TXNRD1, GRIM-12, TR, TR1, TRXR1, TXNR; thioredoxin reductase 1	Pyrimidine metabolism (ko00240);; Selenocompound metabolism (ko00450)	[O]	Posttranslational modification, protein turnover, chaperones	Pyridine nucleotide-disulphide oxidoreductase;; Pyridine nucleotide-disulphide oxidoreductase, dimerisation domain;; Pyridine nucleotide-disulphide oxidoreductase;; Pyridine nucleotide-disulphide oxidoreductase;; FAD binding domain	Thioredoxin reductase 1, cytoplasmic OS=Homo sapiens OX=9606 GN=TXNRD1 PE=1 SV=3	C	Energy production and conversion	thioredoxin reductase 1, cytoplasmic isoform 3 [Homo sapiens]	biological process: metabolic process (GO:0008152);; biological process: cellular process (GO:0009987);; biological process: detoxification (GO:0098754);; biological process: developmental process (GO:0032502);; biological process: multicellular organismal process (GO:0032501);; biological process: single-organism process (GO:0044699);; biological process: biological regulation (GO:0065007);; bio…
ENSG00000152291	TGOLN2	46.182	10978	14.1935	2233	52.734	11064	15.2646	2750	52.5439	10971	53.0931	10203	0.0200349	-1.01376	down	--	--	--	--	--	--	--	--	Trans-Golgi network integral membrane protein 2 OS=Homo sapiens OX=9606 GN=TGOLN2 PE=1 SV=3	U	Intracellular trafficking, secretion, and vesicular transport	trans-Golgi network integral membrane protein 2 isoform 1 precursor [Homo sapiens]	--
ENSG00000253767	PCDHGA8	0.08479	24	0.10324	28	0.566536	143	0.153341	40	0.216931	55	0.079872	19	0.0296391	-1.32525	down	[S]	Function unknown	Molecular Function: calcium ion binding (GO:0005509);; Cellular Component: plasma membrane (GO:0005886);; Biological Process: homophilic cell adhesion via plasma membrane adhesion molecules (GO:0007156);; Cellular Component: integral component of membrane (GO:0016021);;	K16495|0|hsa:9708|K16495 protocadherin gamma subfamily A | (RefSeq) PCDHGA8, PCDH-GAMMA-A8; protocadherin gamma subfamily A, 8	--	[S]	Function unknown	Cadherin domain;; Cadherin-like;; Cadherin cytoplasmic C-terminal;; Cadherin-like	Protocadherin gamma-A8 OS=Homo sapiens OX=9606 GN=PCDHGA8 PE=2 SV=1	U	Intracellular trafficking, secretion, and vesicular transport	protocadherin gamma-A8 isoform 2 precursor [Homo sapiens]	biological process: biological adhesion (GO:0022610);; molecular function: binding (GO:0005488);; cellular component: cell part (GO:0044464);; cellular component: membrane (GO:0016020);; cellular component: membrane part (GO:0044425);; cellular component: cell (GO:0005623);;
ENSG00000181704	YIPF6	6.22497	1800	3.08597	759	2.93113	745	2.95455	668	3.07102	725	2.74516	563	0.034853	-0.644269	down	--	--	Cellular Component: endoplasmic reticulum (GO:0005783);; Cellular Component: cis-Golgi network (GO:0005801);; Cellular Component: trans-Golgi network (GO:0005802);; Cellular Component: integral component of membrane (GO:0016021);; Cellular Component: COPII-coated ER to Golgi transport vesicle (GO:0030134);; Molecular Function: identical protein binding (GO:0042802);; Biological Process: intestina…	--	--	[S]	Function unknown	Yip1 domain	Protein YIPF6 OS=Homo sapiens OX=9606 GN=YIPF6 PE=1 SV=2	U	Intracellular trafficking, secretion, and vesicular transport	protein YIPF6 [Microcebus murinus]	molecular function: binding (GO:0005488);; biological process: cellular process (GO:0009987);; biological process: single-organism process (GO:0044699);; biological process: developmental process (GO:0032502);; cellular component: cell (GO:0005623);; cellular component: organelle part (GO:0044422);; cellular component: membrane (GO:0016020);; cellular component: cell part (GO:0044464);; cellular …
ENSG00000153165	RGPD3	0.286293	69	0.09864	23	0.878583	192	0.459493	103	0.845432	185	0.234581	48	0.0193848	-1.32069	down	--	--	--	K12172|0|hsa:653489|K12172 E3 SUMO-protein ligase RanBP2 | (RefSeq) RGPD3, RGP3; RANBP2-like and GRIP domain containing 3	RNA transport (ko03013)	[U]	Intracellular trafficking, secretion, and vesicular transport	RanBP1 domain;; Rab binding domain;; GRIP domain;; Tetratricopeptide repeat	RanBP2-like and GRIP domain-containing protein 3 OS=Homo sapiens OX=9606 GN=RGPD3 PE=3 SV=2	U	Intracellular trafficking, secretion, and vesicular transport	ranBP2-like and GRIP domain-containing protein 3 [Homo sapiens]	--
ENSG00000198794	SCAMP5	7.04737	743	5.39462	306	10.4967	947	9.39379	874	9.25741	867	6.37787	383	0.0465089	-0.666791	down	--	--	--	K19995|1.36983e-127|cfr:102506806|K19995 secretory carrier-associated membrane protein | (RefSeq) SCAMP5; secretory carrier membrane protein 5	--	[U]	Intracellular trafficking, secretion, and vesicular transport	SCAMP family	Secretory carrier-associated membrane protein 5 OS=Homo sapiens OX=9606 GN=SCAMP5 PE=1 SV=1	U	Intracellular trafficking, secretion, and vesicular transport	PREDICTED: secretory carrier-associated membrane protein 5 [Callithrix jacchus]	--
ENSG00000124171	PARD6B	3.48148	689	2.68531	504	3.97878	716	2.6363	485	4.51893	812	2.23159	375	0.00567315	-0.6526	down	--	--	--	K06093|0|nle:100597121|K06093 partitioning defective protein 6 | (RefSeq) PARD6B; par-6 family cell polarity regulator beta	Rap1 signaling pathway (ko04015);; Endocytosis (ko04144);; Axon guidance (ko04360);; Hippo signaling pathway (ko04390);; Tight junction (ko04530)	[T]	Signal transduction mechanisms	PB1 domain;; PDZ domain (Also known as DHR or GLGF)	Partitioning defective 6 homolog beta OS=Homo sapiens OX=9606 GN=PARD6B PE=1 SV=1	O	Posttranslational modification, protein turnover, chaperones	PREDICTED: partitioning defective 6 homolog beta [Nomascus leucogenys]	--
Human_newGene_12079	--	11.8858	4180	11.3376	3767	25.3765	9080	9.74992	2385	35.4912	13795	10.8685	2462	1.69652e-06	-1.61768	down	--	--	--	--	--	--	--	Gag P30 core shell protein;; Zinc knuckle	Embryonic stem cell-related gene protein OS=Homo sapiens OX=9606 GN=ESRG PE=2 SV=2	L	Replication, recombination and repair	embryonic stem cell related protein, partial [Homo sapiens]	--
ENSG00000119414	PPP6C	10.506	1823	6.51855	994	11.6702	1876	9.88734	1616	11.5767	1843	5.90351	846	0.00474428	-0.635161	down	[T]	Signal transduction mechanisms	--	K15498|0|phd:102339281|K15498 serine/threonine-protein phosphatase 6 catalytic subunit [EC:3.1.3.16] | (RefSeq) PPP6C; protein phosphatase 6 catalytic subunit	--	[DT]	Cell cycle control, cell division, chromosome partitioning;; Signal transduction mechanisms	Calcineurin-like phosphoesterase	Serine/threonine-protein phosphatase 6 catalytic subunit OS=Homo sapiens OX=9606 GN=PPP6C PE=1 SV=1	T	Signal transduction mechanisms	serine/threonine-protein phosphatase 6 catalytic subunit isoform a [Homo sapiens]	--
ENSG00000108861	DUSP3	41.1744	7039	8.06545	1214	11.972	1804	6.87721	968	34.8899	5410	7.3438	977	1.15812e-09	-2.10282	down	[T]	Signal transduction mechanisms	Biological Process: inactivation of MAPK activity (GO:0000188);; Cellular Component: immunological synapse (GO:0001772);; Molecular Function: protein tyrosine phosphatase activity (GO:0004725);; Cellular Component: nucleoplasm (GO:0005654);; Cellular Component: cytosol (GO:0005829);; Molecular Function: protein tyrosine/serine/threonine phosphatase activity (GO:0008138);; Molecular Function: prot…	K17614|3.55122e-122|rro:104672424|K17614 dual specificity phosphatase 3 [EC:3.1.3.16 3.1.3.48] | (RefSeq) DUSP3; dual specificity phosphatase 3	MAPK signaling pathway (ko04010)	[V]	Defense mechanisms	Dual specificity phosphatase, catalytic domain	Dual specificity protein phosphatase 3 OS=Homo sapiens OX=9606 GN=DUSP3 PE=1 SV=1	T	Signal transduction mechanisms	dual specificity protein phosphatase 3 [Homo sapiens]	molecular function: catalytic activity (GO:0003824);; molecular function: binding (GO:0005488);; biological process: cellular process (GO:0009987);; biological process: metabolic process (GO:0008152);; biological process: biological regulation (GO:0065007);; cellular component: extracellular region part (GO:0044421);; cellular component: organelle part (GO:0044422);; cellular component: cell (GO:…
ENSG00000175087	PDIK1L	1.27914	200	1.30579	129	2.03048	220	1.21924	151	2.41921	338	1.19332	144	0.0255582	-0.784721	down	[T]	Signal transduction mechanisms	Molecular Function: protein serine/threonine kinase activity (GO:0004674);; Molecular Function: protein binding (GO:0005515);; Molecular Function: ATP binding (GO:0005524);; Cellular Component: nucleoplasm (GO:0005654);; Cellular Component: nucleolus (GO:0005730);; Cellular Component: cytoplasm (GO:0005737);; Biological Process: protein phosphorylation (GO:0006468);;	K17539|0|hgl:101706377|K17539 serine/threonine-protein kinase PDIK1L [EC:2.7.11.1] | (RefSeq) Pdik1l; PDLIM1 interacting kinase 1 like	--	[OUT]	Posttranslational modification, protein turnover, chaperones;; Intracellular trafficking, secretion, and vesicular transport;; Signal transduction mechanisms	Protein kinase domain;; Protein tyrosine kinase	Serine/threonine-protein kinase PDIK1L OS=Homo sapiens OX=9606 GN=PDIK1L PE=1 SV=1	T	Signal transduction mechanisms	serine/threonine-protein kinase PDIK1L isoform X1 [Aotus nancymaae]	cellular component: organelle (GO:0043226);; cellular component: cell part (GO:0044464);; cellular component: cell (GO:0005623);; cellular component: organelle part (GO:0044422);; molecular function: binding (GO:0005488);; molecular function: catalytic activity (GO:0003824);; biological process: metabolic process (GO:0008152);; biological process: cellular process (GO:0009987);;
ENSG00000140992	PDPK1	7.73855	1990	8.43239	2042	14.3976	3382	6.73456	1616	13.8375	3191	7.32018	1607	0.00322913	-0.657654	down	[M]	Cell wall/membrane/envelope biogenesis	--	K06276|0|hsa:5170|K06276 3-phosphoinositide dependent protein kinase-1 [EC:2.7.11.1] | (RefSeq) PDPK1, PDK1, PDPK2, PDPK2P, PRO0461; 3-phosphoinositide dependent protein kinase 1	Platinum drug resistance (ko01524);; PPAR signaling pathway (ko03320);; FoxO signaling pathway (ko04068);; Sphingolipid signaling pathway (ko04071);; mTOR signaling pathway (ko04150);; PI3K-Akt signaling pathway (ko04151);; AMPK signaling pathway (ko04152);; Apoptosis (ko04210);; Focal adhesion (ko04510);; T cell receptor signaling pathway (ko04660);; Fc epsilon RI signaling pathway (ko04664);; N…	[T]	Signal transduction mechanisms	Protein kinase domain;; PH domain;; Protein tyrosine kinase;; Kinase-like	3-phosphoinositide-dependent protein kinase 1 OS=Homo sapiens OX=9606 GN=PDPK1 PE=1 SV=1	T	Signal transduction mechanisms	3-phosphoinositide-dependent protein kinase 1 isoform 1 [Homo sapiens]	--
ENSG00000136997	MYC	50.0278	3205	8.15505	324	6.49336	247	5.95723	245	30.6333	2469	5.74071	227	1.22665e-06	-2.82224	down	--	--	--	K04377|0|hsa:4609|K04377 Myc proto-oncogene protein | (RefSeq) MYC, MRTL, MYCC, bHLHe39, c-Myc; v-myc avian myelocytomatosis viral oncogene homolog	MAPK signaling pathway (ko04010);; ErbB signaling pathway (ko04012);; Cell cycle (ko04110);; PI3K-Akt signaling pathway (ko04151);; Wnt signaling pathway (ko04310);; TGF-beta signaling pathway (ko04350);; Hippo signaling pathway (ko04390);; Signaling pathways regulating pluripotency of stem cells (ko04550);; Jak-STAT signaling pathway (ko04630);; Thyroid hormone signaling pathway (ko04919);; Hepa…	--	--	Myc amino-terminal region;; Myc leucine zipper domain;; Helix-loop-helix DNA-binding domain	Myc proto-oncogene protein OS=Homo sapiens OX=9606 GN=MYC PE=1 SV=1	K	Transcription	myc proto-oncogene protein isoform 1 [Homo sapiens]	--
ENSG00000115738	ID2	37.4446	2168	8.44421	583	12.2128	826	10.9854	759	14.101	872	11.417	634	0.00443368	-0.888856	down	--	--	--	K17693|3.77904e-100|rro:104675219|K17693 DNA-binding protein inhibitor ID2 | (RefSeq) ID2; inhibitor of DNA binding 2, HLH protein	TGF-beta signaling pathway (ko04350);; Hippo signaling pathway (ko04390);; Signaling pathways regulating pluripotency of stem cells (ko04550);; Transcriptional misregulation in cancer (ko05202)	--	--	Helix-loop-helix DNA-binding domain	DNA-binding protein inhibitor ID-2 OS=Homo sapiens OX=9606 GN=ID2 PE=1 SV=1	K	Transcription	DNA-binding protein inhibitor ID-2 [Aotus nancymaae]	--
ENSG00000128342	LIF	23.5188	3943	18.3145	2913	28.2004	4337	17.2238	2640	29.0626	4429	17.1585	2402	0.00017493	-0.624507	down	--	--	--	K05419|7.28851e-110|ptr:736309|K05419 leukemia inhibitory factor | (RefSeq) LIF; leukemia inhibitory factor	Cytokine-cytokine receptor interaction (ko04060);; Signaling pathways regulating pluripotency of stem cells (ko04550);; Jak-STAT signaling pathway (ko04630);; TNF signaling pathway (ko04668)	--	--	LIF / OSM family	Leukemia inhibitory factor OS=Homo sapiens OX=9606 GN=LIF PE=1 SV=1	K	Transcription	leukemia inhibitory factor isoform 1 precursor [Homo sapiens]	--
ENSG00000285547	AL133500.1	1.27934	97	0.618923	45	1.16027	80	0.509791	36	1.96576	135	1.05002	67	0.0249064	-1.00352	down	[BQ]	Chromatin structure and dynamics;; Secondary metabolites biosynthesis, transport and catabolism	Cellular Component: histone deacetylase complex (GO:0000118);; Biological Process: negative regulation of transcription from RNA polymerase II promoter (GO:0000122);; Cellular Component: nuclear chromosome (GO:0000228);; Cellular Component: cytosol (GO:0005829);; Cellular Component: plasma membrane (GO:0005886);; Biological Process: chromatin assembly or disassembly (GO:0006333);; Molecular Funct…	K11405|0|hsa:55869|K11405 histone deacetylase 8 [EC:3.5.1.98] | (RefSeq) HDAC8, CDA07, CDLS5, HD8, HDACL1, MRXS6, RPD3, WTS; histone deacetylase 8	Alcoholism (ko05034);; Viral carcinogenesis (ko05203)	[B]	Chromatin structure and dynamics	Histone deacetylase domain;; CITED	Histone deacetylase 8 OS=Homo sapiens OX=9606 GN=HDAC8 PE=1 SV=2	K	Transcription	PREDICTED: histone deacetylase 8 isoform X3 [Pan troglodytes]	cellular component: membrane (GO:0016020);; cellular component: organelle (GO:0043226);; cellular component: cell part (GO:0044464);; cellular component: macromolecular complex (GO:0032991);; cellular component: cell (GO:0005623);; cellular component: organelle part (GO:0044422);; cellular component: membrane-enclosed lumen (GO:0031974);; biological process: metabolic process (GO:0008152);; biolo…
ENSG00000115507	OTX1	0.896303	110	0.618738	65	1.06066	111	0.477657	39	0.931611	99	0.721387	68	0.0457786	-0.82843	down	--	--	--	K09326|1.24332e-71|chx:102172273|K09326 homeobox protein OTX1 | (RefSeq) OTX1; orthodenticle homeobox 1	Signaling pathways regulating pluripotency of stem cells (ko04550)	[K]	Transcription	Otx1 transcription factor;; Homeobox domain	Homeobox protein OTX1 OS=Homo sapiens OX=9606 GN=OTX1 PE=1 SV=1	K	Transcription	homeobox protein OTX1 [Papio anubis]	--
ENSG00000177192	PUS1	13.1662	1395	12.8249	1285	18.0575	1818	13.5773	1025	19.9814	1878	17.5627	909	0.00342799	-0.616322	down	[J]	Translation, ribosomal structure and biogenesis	Molecular Function: pseudouridylate synthase activity (GO:0004730);; Cellular Component: nucleus (GO:0005634);; Cellular Component: mitochondrial matrix (GO:0005759);; Molecular Function: pseudouridine synthase activity (GO:0009982);; Molecular Function: RNA binding (GO:0044822);; Biological Process: mitochondrial tRNA pseudouridine synthesis (GO:0070902);;	K06173|0|hsa:80324|K06173 tRNA pseudouridine38-40 synthase [EC:5.4.99.12] | (RefSeq) PUS1, MLASA1; pseudouridylate synthase 1	--	[J]	Translation, ribosomal structure and biogenesis	tRNA pseudouridine synthase	tRNA pseudouridine synthase A OS=Homo sapiens OX=9606 GN=PUS1 PE=1 SV=3	J	Translation, ribosomal structure and biogenesis	tRNA pseudouridine synthase A isoform 1 [Homo sapiens]	molecular function: catalytic activity (GO:0003824);; biological process: metabolic process (GO:0008152);; biological process: cellular process (GO:0009987);; cellular component: cell part (GO:0044464);; cellular component: organelle (GO:0043226);; cellular component: cell (GO:0005623);; cellular component: organelle part (GO:0044422);; cellular component: membrane-enclosed lumen (GO:0031974);;
Human_newGene_8626	--	4.56422	382	5.1923	447	5.73029	323	8.53826	614	8.13478	502	10.7675	730	0.029782	0.636936	up	--	--	Cellular Component: endoplasmic reticulum membrane (GO:0005789);; Biological Process: small molecule metabolic process (GO:0044281);; Biological Process: ceramide biosynthetic process (GO:0046513);; Molecular Function: sphingosine N-acyltransferase activity (GO:0050291);;	--	--	--	--	--	Putative uncharacterized protein encoded by LINC00269 OS=Homo sapiens OX=9606 GN=LINC00269 PE=5 SV=1	--	--	hCG1814151 [Homo sapiens]	molecular function: catalytic activity (GO:0003824);; biological process: single-organism process (GO:0044699);; biological process: metabolic process (GO:0008152);; biological process: cellular process (GO:0009987);; cellular component: cell (GO:0005623);; cellular component: organelle part (GO:0044422);; cellular component: membrane part (GO:0044425);; cellular component: cell part (GO:0044464)…
Human_newGene_13486	--	1.24794	94	1.41407	119	0.671371	31	1.3009	116	0.919498	73	1.68487	134	0.0295378	0.971907	up	--	--	Molecular Function: double-stranded DNA binding (GO:0003690);; Molecular Function: transcription factor activity, sequence-specific DNA binding (GO:0003700);; Cellular Component: nucleus (GO:0005634);; Biological Process: multicellular organism development (GO:0007275);; Molecular Function: zinc ion binding (GO:0008270);; Molecular Function: protein homodimerization activity (GO:0042803);; Molecu…	--	--	--	--	--	Putative uncharacterized protein encoded by LINC00596 OS=Homo sapiens OX=9606 GN=LINC00596 PE=5 SV=1	--	--	hCG2038800, partial [Homo sapiens]	cellular component: cell (GO:0005623);; cellular component: cell part (GO:0044464);; cellular component: organelle (GO:0043226);; biological process: single-organism process (GO:0044699);; biological process: multicellular organismal process (GO:0032501);; biological process: developmental process (GO:0032502);; biological process: rhythmic process (GO:0048511);; biological process: biological re…
Human_newGene_16994	--	2.02821	106	2.59399	125	1.14311	54	2.27747	113	0.716452	35	3.05495	138	0.0232503	1.02706	up	--	--	Cellular Component: Golgi membrane (GO:0000139);; Cellular Component: extracellular space (GO:0005615);; Cellular Component: nucleus (GO:0005634);; Cellular Component: endoplasmic reticulum membrane (GO:0005789);; Cellular Component: cis-Golgi network (GO:0005801);; Biological Process: translation (GO:0006412);; Biological Process: SRP-dependent cotranslational protein targeting to membrane (GO:0…	--	--	--	--	--	UPF0764 protein C16orf89 OS=Homo sapiens OX=9606 GN=C16orf89 PE=1 SV=2	--	--	similar to FKSG60, partial [Homo sapiens]	cellular component: extracellular region part (GO:0044421);; cellular component: cell (GO:0005623);; cellular component: organelle part (GO:0044422);; cellular component: extracellular region (GO:0005576);; cellular component: membrane (GO:0016020);; cellular component: cell part (GO:0044464);; cellular component: organelle (GO:0043226);; cellular component: membrane part (GO:0044425);; molecular…
Human_newGene_15809	--	0.225111	32	0.642752	50	0.562857	12	0.44008	47	0.357153	30	0.578115	51	0.0283172	1.06351	up	--	--	--	K09699|2.40089e-07|mcf:101926860|K09699 2-oxoisovalerate dehydrogenase E2 component (dihydrolipoyl transacylase) [EC:2.3.1.168] | (RefSeq) DBT; dihydrolipoamide branched chain transacylase E2	Valine, leucine and isoleucine degradation (ko00280);; Propanoate metabolism (ko00640)	--	--	--	--	--	--	unnamed protein product [Homo sapiens]	--
Human_newGene_24991	--	0.332921	45	0.410401	53	0.323964	40	0.77342	97	0.254637	32	0.842645	97	0.00984145	1.14632	up	--	--	--	--	--	--	--	--	--	--	--	--	--
Human_newGene_23275	--	0.342264	45	2.01331	231	2.48201	299	2.93773	361	1.00526	110	3.63586	386	0.0339845	1.15121	up	--	--	Cellular Component: Golgi membrane (GO:0000139);; Cellular Component: extracellular space (GO:0005615);; Cellular Component: nucleus (GO:0005634);; Cellular Component: endoplasmic reticulum membrane (GO:0005789);; Cellular Component: cis-Golgi network (GO:0005801);; Biological Process: translation (GO:0006412);; Biological Process: SRP-dependent cotranslational protein targeting to membrane (GO:0…	--	--	--	--	--	UPF0764 protein C16orf89 OS=Homo sapiens OX=9606 GN=C16orf89 PE=1 SV=2	--	--	hCG2038827, partial [Homo sapiens]	molecular function: catalytic activity (GO:0003824);; biological process: metabolic process (GO:0008152);; biological process: cellular process (GO:0009987);; biological process: biological regulation (GO:0065007);; biological process: developmental process (GO:0032502);; biological process: single-organism process (GO:0044699);; biological process: multicellular organismal process (GO:0032501);;…
Human_newGene_7137	--	2.07834	72	3.05608	90	3.48008	104	11.1108	505	2.81221	81	1.31088	51	0.0368652	1.34802	up	--	--	--	--	--	--	--	--	--	--	--	hCG2005374 [Homo sapiens]	--
Human_newGene_31350	--	0.649983	35	0.600302	129	0.303953	64	0.332299	71	0.491249	20	0.487824	95	0.00607108	1.35895	up	--	--	Cellular Component: endoplasmic reticulum membrane (GO:0005789);; Biological Process: drug metabolic process (GO:0017144);; Biological Process: peptidyl-glutamic acid carboxylation (GO:0017187);; Biological Process: post-translational protein modification (GO:0043687);;	K05357|1.82969e-24|pps:103784246|K05357 vitamin-K-epoxide reductase (warfarin-sensitive) [EC:1.17.4.4] | (RefSeq) VKORC1; vitamin K epoxide reductase complex subunit 1	Ubiquinone and other terpenoid-quinone biosynthesis (ko00130)	--	--	--	Putative uncharacterized protein encoded by LINC00269 OS=Homo sapiens OX=9606 GN=LINC00269 PE=5 SV=1	--	--	hypothetical protein EGM_14979, partial [Macaca fascicularis]	cellular component: organelle part (GO:0044422);; cellular component: cell (GO:0005623);; cellular component: membrane part (GO:0044425);; cellular component: cell part (GO:0044464);; cellular component: membrane (GO:0016020);; cellular component: organelle (GO:0043226);; biological process: metabolic process (GO:0008152);; biological process: cellular process (GO:0009987);;
Human_newGene_2469	--	1.15956	103	3.76102	313	0.266255	21	4.09108	334	1.60203	129	0.619741	47	0.0249578	1.48219	up	--	--	--	--	--	--	--	--	--	--	--	hCG2018832, partial [Homo sapiens]	--
ENSG00000241360	PDXP	1.44574	126	13.1775	1076	2.69866	212	2.49035	200	2.13714	168	13.9855	1022	5.93739e-06	2.24661	up	[F]	Nucleotide transport and metabolism	Molecular Function: magnesium ion binding (GO:0000287);; Molecular Function: phosphoserine phosphatase activity (GO:0004647);; Molecular Function: phosphoprotein phosphatase activity (GO:0004721);; Cellular Component: cytosol (GO:0005829);; Biological Process: protein dephosphorylation (GO:0006470);; Biological Process: regulation of mitotic nuclear division (GO:0007088);; Cellular Component: act…	K07758|1.93638e-166|hsa:57026|K07758 pyridoxal phosphatase [EC:3.1.3.74] | (RefSeq) PDXP, CIN, PLP, dJ37E16.5; pyridoxal phosphatase	Vitamin B6 metabolism (ko00750)	[P]	Inorganic ion transport and metabolism	Haloacid dehalogenase-like hydrolase;; HAD-hyrolase-like;; haloacid dehalogenase-like hydrolase;; Haloacid dehalogenase-like hydrolase	Pyridoxal phosphate phosphatase OS=Homo sapiens OX=9606 GN=PDXP PE=1 SV=2	G	Carbohydrate transport and metabolism	pyridoxal phosphate phosphatase [Homo sapiens]	molecular function: binding (GO:0005488);; molecular function: catalytic activity (GO:0003824);; biological process: single-organism process (GO:0044699);; biological process: response to stimulus (GO:0050896);; biological process: cellular component organization or biogenesis (GO:0071840);; biological process: biological regulation (GO:0065007);; biological process: metabolic process (GO:0008152…
ENSG00000184661	CDCA2	14.719	2302	19.1488	2846	12.7901	1813	21.4303	3127	12.0321	1725	21.228	2825	0.000146922	0.653706	up	--	--	Cellular Component: nucleoplasm (GO:0005654);; Cellular Component: chromosome (GO:0005694);; Cellular Component: cytoplasm (GO:0005737);; Biological Process: chromosome segregation (GO:0007059);; Biological Process: mitotic cell cycle (GO:0007067);; Biological Process: positive regulation of protein dephosphorylation (GO:0035307);; Biological Process: cell division (GO:0051301);;	K17590|0|hsa:157313|K17590 cell division cycle-associated protein 2 | (RefSeq) CDCA2, PPP1R81, Repo-Man; cell division cycle associated 2	--	--	--	Protein phosphatase 1 binding	Cell division cycle-associated protein 2 OS=Homo sapiens OX=9606 GN=CDCA2 PE=1 SV=2	D	Cell cycle control, cell division, chromosome partitioning	cell division cycle-associated protein 2 isoform 1 [Homo sapiens]	cellular component: organelle part (GO:0044422);; cellular component: cell (GO:0005623);; cellular component: cell part (GO:0044464);; cellular component: organelle (GO:0043226);; biological process: cellular process (GO:0009987);; biological process: biological regulation (GO:0065007);; biological process: single-organism process (GO:0044699);;
ENSG00000134690	CDCA8	65.1345	6649	81.0807	7831	44.5121	4083	80.401	7581	42.9448	3962	80.2615	6925	0.000493953	0.670772	up	--	--	Cellular Component: chromosome, centromeric region (GO:0000775);; Molecular Function: protein binding (GO:0005515);; Cellular Component: nucleoplasm (GO:0005654);; Cellular Component: nucleolus (GO:0005730);; Cellular Component: cytosol (GO:0005829);; Biological Process: sister chromatid cohesion (GO:0007062);; Biological Process: mitotic metaphase plate congression (GO:0007080);; Cellular Compon…	K11514|0|pon:100174395|K11514 Borealin | (RefSeq) CDCA8, Borealin; cell division cycle associated 8	--	--	--	Cell division cycle-associated protein 8;; Nbl1 / Borealin N terminal	Borealin OS=Homo sapiens OX=9606 GN=CDCA8 PE=1 SV=2	D	Cell cycle control, cell division, chromosome partitioning	PREDICTED: borealin isoform X1 [Callithrix jacchus]	cellular component: organelle (GO:0043226);; cellular component: cell part (GO:0044464);; cellular component: macromolecular complex (GO:0032991);; cellular component: extracellular region part (GO:0044421);; cellular component: extracellular region (GO:0005576);; cellular component: organelle part (GO:0044422);; cellular component: cell (GO:0005623);; molecular function: binding (GO:0005488);; b…
Human_newGene_41016	--	5.56747	419	5.83731	720	5.30645	344	5.05928	508	4.36176	354	6.11351	496	0.00850857	0.681178	up	--	--	Cellular Component: chromosome, centromeric region (GO:0000775);; Cellular Component: transverse filament (GO:0000802);; Cellular Component: male germ cell nucleus (GO:0001673);; Biological Process: chromosome segregation (GO:0007059);; Biological Process: synaptonemal complex assembly (GO:0007130);; Cellular Component: meiotic cohesin complex (GO:0030893);;	K13055|5.72981e-46|ggo:101129443|K13055 cohesin complex subunit SA-3 | (RefSeq) STAG3; stromal antigen 3	Oocyte meiosis (ko04114)	[D]	Cell cycle control, cell division, chromosome partitioning	--	Putative STAG3-like protein 2 OS=Homo sapiens OX=9606 GN=STAG3L2 PE=5 SV=1	D	Cell cycle control, cell division, chromosome partitioning	unnamed protein product [Macaca fascicularis]	biological process: cellular process (GO:0009987);; biological process: reproduction (GO:0000003);; biological process: reproductive process (GO:0022414);; biological process: cellular component organization or biogenesis (GO:0071840);; biological process: single-organism process (GO:0044699);; cellular component: macromolecular complex (GO:0032991);; cellular component: cell part (GO:0044464);; …
ENSG00000162063	CCNF	31.3585	5659	42.9265	7358	25.6475	4226	48.2584	8137	25.1037	4054	47.1138	7242	5.44827e-06	0.769308	up	--	--	Biological Process: re-entry into mitotic cell cycle (GO:0000320);; Biological Process: placenta development (GO:0001890);; Molecular Function: protein binding (GO:0005515);; Cellular Component: nucleus (GO:0005634);; Cellular Component: centriole (GO:0005814);; Biological Process: mitotic cell cycle (GO:0007067);; Biological Process: negative regulation of centrosome duplication (GO:0010826);; B…	K10289|0|hsa:899|K10289 F-box protein 1 (cyclin F) | (RefSeq) CCNF, FBX1, FBXO1; cyclin F	--	[D]	Cell cycle control, cell division, chromosome partitioning	Cyclin, N-terminal domain;; Cyclin, C-terminal domain;; F-box domain;; F-box-like	Cyclin-F OS=Homo sapiens OX=9606 GN=CCNF PE=1 SV=2	D	Cell cycle control, cell division, chromosome partitioning	cyclin F [Homo sapiens]	biological process: reproduction (GO:0000003);; biological process: reproductive process (GO:0022414);; biological process: multicellular organismal process (GO:0032501);; biological process: single-organism process (GO:0044699);; biological process: developmental process (GO:0032502);; biological process: metabolic process (GO:0008152);; biological process: cellular process (GO:0009987);; biolog…
ENSG00000263020	AL662899.2	4.56161	430	9.19778	889	16.8644	1583	22.508	2185	4.90359	405	28.6481	2536	0.00848671	1.27449	up	--	--	Molecular Function: chromatin binding (GO:0003682);; Molecular Function: protein serine/threonine kinase activity (GO:0004674);; Molecular Function: receptor binding (GO:0005102);; Cellular Component: nucleoplasm (GO:0005654);; Cellular Component: cytosol (GO:0005829);; Cellular Component: plasma membrane (GO:0005886);; Cellular Component: protein kinase CK2 complex (GO:0005956);; Biological Proc…	K03115|4.20339e-119|phd:102316431|K03115 casein kinase II subunit beta | (RefSeq) CSNK2B; casein kinase 2 beta	Ribosome biogenesis in eukaryotes (ko03008);; NF-kappa B signaling pathway (ko04064);; Wnt signaling pathway (ko04310);; Adherens junction (ko04520);; Tight junction (ko04530);; Measles (ko05162);; Herpes simplex infection (ko05168);; Epstein-Barr virus infection (ko05169)	[TDK]	Signal transduction mechanisms;; Cell cycle control, cell division, chromosome partitioning;; Transcription	Casein kinase II regulatory subunit	Casein kinase II subunit beta OS=Homo sapiens OX=9606 GN=CSNK2B PE=1 SV=1	DKT	Cell cycle control, cell division, chromosome partitioning;; Transcription;; Signal transduction mechanisms	chimera CSNK2B-LY6G5B splicing isoform 1181 [Homo sapiens]	biological process: signaling (GO:0023052);; biological process: biological regulation (GO:0065007);; biological process: response to stimulus (GO:0050896);; biological process: cellular process (GO:0009987);; biological process: metabolic process (GO:0008152);; biological process: developmental process (GO:0032502);; biological process: multicellular organismal process (GO:0032501);; biological …
ENSG00000255112	CHMP1B	7.95213	1042	8.78715	1090	12.2264	1455	22.7171	2761	12.9836	1544	21.2321	2356	0.0234627	0.678011	up	--	--	--	K12197|7.919e-103|umr:103673369|K12197 charged multivesicular body protein 1 | (RefSeq) CHMP1B; charged multivesicular body protein 1B	Endocytosis (ko04144)	[U]	Intracellular trafficking, secretion, and vesicular transport	Snf7	Charged multivesicular body protein 1b OS=Homo sapiens OX=9606 GN=CHMP1B PE=1 SV=1	N	Cell motility	charged multivesicular body protein 1b [Homo sapiens]	--
ENSG00000121621	KIF18A	15.3644	2351	19.0186	2756	17.016	2365	29.8788	4242	18.1505	2522	26.971	3496	0.00206557	0.594009	up	--	--	--	K10401|0|hsa:81930|K10401 kinesin family member 18/19 | (RefSeq) KIF18A, MS-KIF18A, PPP1R99; kinesin family member 18A	--	[Z]	Cytoskeleton	Kinesin motor domain;; Microtubule binding	Kinesin-like protein KIF18A OS=Homo sapiens OX=9606 GN=KIF18A PE=1 SV=2	Z	Cytoskeleton	kinesin-like protein KIF18A [Homo sapiens]	--
ENSG00000133318	RTN3	27.7294	3247	55.1521	5718	24.963	3246	54.9333	5577	22.2845	2451	52.2974	4848	1.44929e-07	0.908126	up	--	--	Cellular Component: Golgi membrane (GO:0000139);; Molecular Function: protein binding (GO:0005515);; Cellular Component: extracellular space (GO:0005615);; Cellular Component: endoplasmic reticulum membrane (GO:0005789);; Cellular Component: plasma membrane (GO:0005886);; Biological Process: apoptotic process (GO:0006915);; Biological Process: chemical synaptic transmission (GO:0007268);; Cellula…	K20723|0|hsa:10313|K20723 reticulon-3 | (RefSeq) RTN3, ASYIP, HAP, NSPL2, NSPLII, RTN3-A1; reticulon 3	--	--	--	Reticulon	Reticulon-3 OS=Homo sapiens OX=9606 GN=RTN3 PE=1 SV=2	U	Intracellular trafficking, secretion, and vesicular transport	reticulon-3 isoform e [Homo sapiens]	cellular component: extracellular region (GO:0005576);; cellular component: membrane part (GO:0044425);; cellular component: membrane (GO:0016020);; cellular component: cell part (GO:0044464);; cellular component: organelle (GO:0043226);; cellular component: cell (GO:0005623);; cellular component: extracellular region part (GO:0044421);; cellular component: organelle part (GO:0044422);; biologica…
ENSG00000109501	WFS1	8.08963	1207	7.63938	1086	8.42724	1131	20.1647	2876	8.71226	1164	21.8343	2839	0.000648356	1.03018	up	--	--	--	K14020|0|nle:100582796|K14020 wolfamin | (RefSeq) WFS1; wolframin ER transmembrane glycoprotein	Protein processing in endoplasmic reticulum (ko04141)	--	--	--	Wolframin OS=Homo sapiens OX=9606 GN=WFS1 PE=1 SV=2	U	Intracellular trafficking, secretion, and vesicular transport	PREDICTED: wolframin isoform X1 [Nomascus leucogenys]	--
ENSG00000273003	ARL2-SNX15	1.29115	133	5.0229	488	0.408701	39	3.80705	363	0.173216	17	0.192718	17	0.00824296	2.24432	up	[R]	General function prediction only	--	K17927|0|pps:100970178|K17927 sorting nexin-15 | (RefSeq) SNX15; sorting nexin 15	--	[ZUD]	Cytoskeleton;; Intracellular trafficking, secretion, and vesicular transport;; Cell cycle control, cell division, chromosome partitioning	PX domain;; MIT (microtubule interacting and transport) domain;; ADP-ribosylation factor family;; Ras of Complex, Roc, domain of DAPkinase;; Gtr1/RagA G protein conserved region;; Ras family;; Signal recognition particle receptor beta subunit;; 50S ribosome-binding GTPase	Sorting nexin-15 OS=Homo sapiens OX=9606 GN=SNX15 PE=1 SV=1	U	Intracellular trafficking, secretion, and vesicular transport	hCG23393, isoform CRA_a [Homo sapiens]	--
ENSG00000124222	STX16	8.53105	1077	10.2598	1655	10.4364	1472	18.8307	2847	6.86605	1010	9.67898	1172	0.00921621	0.710636	up	--	--	--	K08489|0|hsa:8675|K08489 syntaxin 16 | (RefSeq) STX16, SYN16; syntaxin 16	SNARE interactions in vesicular transport (ko04130)	[U]	Intracellular trafficking, secretion, and vesicular transport	SNARE domain;; Syntaxin	Syntaxin-16 OS=Homo sapiens OX=9606 GN=STX16 PE=1 SV=3	U	Intracellular trafficking, secretion, and vesicular transport	syntaxin-16 isoform a [Homo sapiens]	--
ENSG00000104660	LEPROTL1	9.6558	1237	10.8684	1337	5.47993	616	11.7437	1405	5.73984	639	9.95485	1126	0.00481085	0.702304	up	--	--	--	--	--	[T]	Signal transduction mechanisms	Vacuolar protein sorting 55	Leptin receptor overlapping transcript-like 1 OS=Homo sapiens OX=9606 GN=LEPROTL1 PE=1 SV=2	U	Intracellular trafficking, secretion, and vesicular transport	leptin receptor overlapping transcript-like 1 isoform 1 [Homo sapiens]	--
ENSG00000243708	PLA2G4B	1.47327	189	1.4705	179	0.169888	20	1.92173	229	0.605659	71	1.6021	174	0.0445623	1.14111	up	--	--	Molecular Function: lysophospholipase activity (GO:0004622);; Molecular Function: calcium ion binding (GO:0005509);; Molecular Function: calcium-dependent phospholipid binding (GO:0005544);; Cellular Component: extracellular region (GO:0005576);; Cellular Component: mitochondrial inner membrane (GO:0005743);; Cellular Component: cytosol (GO:0005829);; Biological Process: phosphatidic acid biosynt…	K16342|0|hsa:100137049|K16342 cytosolic phospholipase A2 [EC:3.1.1.4] | (RefSeq) PLA2G4B, HsT16992, cPLA2-beta; phospholipase A2 group IVB	Glycerophospholipid metabolism (ko00564);; Ether lipid metabolism (ko00565);; Arachidonic acid metabolism (ko00590);; Linoleic acid metabolism (ko00591);; alpha-Linolenic acid metabolism (ko00592);; MAPK signaling pathway (ko04010);; Ras signaling pathway (ko04014);; Phospholipase D signaling pathway (ko04072);; Vascular smooth muscle contraction (ko04270);; VEGF signaling pathway (ko04370);; Pla…	[I]	Lipid transport and metabolism	Lysophospholipase catalytic domain;; C2 domain	Cytosolic phospholipase A2 beta OS=Homo sapiens OX=9606 GN=PLA2G4B PE=1 SV=2	I	Lipid transport and metabolism	cytosolic phospholipase A2 beta [Homo sapiens]	biological process: cellular process (GO:0009987);; biological process: metabolic process (GO:0008152);; biological process: reproductive process (GO:0022414);; biological process: reproduction (GO:0000003);; biological process: single-organism process (GO:0044699);; biological process: multicellular organismal process (GO:0032501);; biological process: multi-organism process (GO:0051704);; biolo…
ENSG00000158747	NBL1	9.80877	820	18.3061	1595	21.0871	1747	21.7429	1844	8.92154	733	22.0261	1720	0.0170738	0.694336	up	--	--	Cellular Component: extracellular space (GO:0005615);; Molecular Function: morphogen activity (GO:0016015);; Biological Process: sequestering of BMP in extracellular matrix (GO:0035582);; Molecular Function: BMP binding (GO:0036122);; Biological Process: sequestering of BMP from receptor via BMP binding (GO:0038098);; Molecular Function: protein homodimerization activity (GO:0042803);; Biological…	K19558|4.9639e-89|nle:100593798|K19558 neuroblastoma suppressor of tumorigenicity 1 | (RefSeq) NBL1; neuroblastoma suppressor of tumorigenicity 1	TGF-beta signaling pathway (ko04350)	--	--	DAN domain;; Cystine-knot domain	Neuroblastoma suppressor of tumorigenicity 1 OS=Homo sapiens OX=9606 GN=NBL1 PE=1 SV=2	O	Posttranslational modification, protein turnover, chaperones	PREDICTED: neuroblastoma suppressor of tumorigenicity 1 isoform X1 [Colobus angolensis palliatus]	cellular component: macromolecular complex (GO:0032991);; cellular component: organelle part (GO:0044422);; cellular component: cell (GO:0005623);; cellular component: extracellular region part (GO:0044421);; cellular component: cell part (GO:0044464);; cellular component: membrane (GO:0016020);; cellular component: organelle (GO:0043226);; cellular component: membrane part (GO:0044425);; cellula…
ENSG00000153094	BCL2L11	2.13605	207	4.71843	524	4.23919	455	4.90303	545	4.21091	258	4.88114	510	0.0110541	0.825366	up	--	--	--	K16341|1.45281e-101|pon:100443209|K16341 Bcl-2-like protein 11 | (RefSeq) BCL2L11; BCL2 like 11	EGFR tyrosine kinase inhibitor resistance (ko01521);; FoxO signaling pathway (ko04068);; PI3K-Akt signaling pathway (ko04151);; Apoptosis (ko04210);; Apoptosis - multiple species (ko04215);; Non-alcoholic fatty liver disease (NAFLD) (ko04932);; MicroRNAs in cancer (ko05206)	--	--	Bim protein N-terminus;; Bcl-x interacting, BH3 domain	Bcl-2-like protein 11 OS=Homo sapiens OX=9606 GN=BCL2L11 PE=1 SV=1	O	Posttranslational modification, protein turnover, chaperones	bcl-2-like protein 11 isoform X1 [Pongo abelii]	--
ENSG00000035862	TIMP2	17.8889	2663	56.0566	8216	45.2523	6050	79.8124	11249	37.1616	4976	45.4275	5661	0.00153468	0.905601	up	--	--	Molecular Function: protease binding (GO:0002020);; Molecular Function: integrin binding (GO:0005178);; Cellular Component: proteinaceous extracellular matrix (GO:0005578);; Cellular Component: extracellular space (GO:0005615);; Biological Process: central nervous system development (GO:0007417);; Biological Process: aging (GO:0007568);; Molecular Function: metalloendopeptidase inhibitor activity…	--	--	[R]	General function prediction only	Tissue inhibitor of metalloproteinase	Metalloproteinase inhibitor 2 OS=Homo sapiens OX=9606 GN=TIMP2 PE=1 SV=2	O	Posttranslational modification, protein turnover, chaperones	metalloproteinase inhibitor 2 precursor [Homo sapiens]	biological process: cellular component organization or biogenesis (GO:0071840);; biological process: response to stimulus (GO:0050896);; biological process: single-organism process (GO:0044699);; biological process: multicellular organismal process (GO:0032501);; biological process: developmental process (GO:0032502);; biological process: cellular process (GO:0009987);; biological process: biolog…
Human_newGene_2105	--	1.58444	257	1.5996	345	2.71414	533	3.75072	725	1.90682	321	4.0469	711	0.0403342	0.739169	up	--	--	--	--	--	--	--	RNase H;; Reverse transcriptase (RNA-dependent DNA polymerase);; Gag P30 core shell protein;; Zinc knuckle	Syncytin-1 OS=Homo sapiens OX=9606 GN=ERVW-1 PE=1 SV=1	L	Replication, recombination and repair	hCG2041486, partial [Homo sapiens]	--
ENSG00000140451	PIF1	15.3494	1770	19.6296	2143	11.1734	1167	21.6935	2314	8.8912	931	20.5013	1996	0.000188354	0.805226	up	[L]	Replication, recombination and repair	--	K15255|0|hsa:80119|K15255 ATP-dependent DNA helicase PIF1 [EC:3.6.4.12] | (RefSeq) PIF1, C15orf20, PIF; PIF1 5'-to-3' DNA helicase	--	[D]	Cell cycle control, cell division, chromosome partitioning	PIF1-like helicase;; AAA domain;; AAA domain;; Helicase	ATP-dependent DNA helicase PIF1 OS=Homo sapiens OX=9606 GN=PIF1 PE=1 SV=2	L	Replication, recombination and repair	PREDICTED: ATP-dependent DNA helicase PIF1 isoform X1 [Pan troglodytes]	--
Human_newGene_20990	--	0.379018	32	1.37539	108	0.274109	21	0.428548	33	0.498931	38	3.77079	193	0.000991651	1.96422	up	--	--	Molecular Function: signal transducer activity (GO:0004871);; Cellular Component: endosome (GO:0005768);; Biological Process: regulation of transcription, DNA-templated (GO:0006355);; Biological Process: signal transduction (GO:0007165);; Cellular Component: cytoplasmic vesicle membrane (GO:0030659);; Cellular Component: integral component of organelle membrane (GO:0031301);;	--	--	--	--	--	Vesicular, overexpressed in cancer, prosurvival protein 1 OS=Homo sapiens OX=9606 GN=VOPP1 PE=2 SV=1	A	RNA processing and modification	vesicular, overexpressed in cancer, prosurvival protein 1 isoform 5 [Homo sapiens]	biological process: biological regulation (GO:0065007);; biological process: cellular process (GO:0009987);; molecular function: signal transducer activity (GO:0004871);; cellular component: membrane part (GO:0044425);; cellular component: membrane (GO:0016020);; cellular component: cell part (GO:0044464);; cellular component: organelle (GO:0043226);; cellular component: cell (GO:0005623);; cellu…
ENSG00000166483	WEE1	21.3102	2580	26.1655	3021	22.0647	2290	43.2599	4550	24.3743	2501	40.7907	3961	0.000207507	0.707717	up	[T]	Signal transduction mechanisms	Biological Process: G2/M transition of mitotic cell cycle (GO:0000086);; Biological Process: microtubule cytoskeleton organization (GO:0000226);; Molecular Function: magnesium ion binding (GO:0000287);; Molecular Function: protein serine/threonine kinase activity (GO:0004674);; Molecular Function: non-membrane spanning protein tyrosine kinase activity (GO:0004715);; Molecular Function: protein bi…	K06632|0|nle:100590563|K06632 wee1-like protein kinase [EC:2.7.11.1] | (RefSeq) WEE1; WEE1 G2 checkpoint kinase	Cell cycle (ko04110)	[D]	Cell cycle control, cell division, chromosome partitioning	Protein kinase domain;; Protein tyrosine kinase	Wee1-like protein kinase OS=Homo sapiens OX=9606 GN=WEE1 PE=1 SV=2	T	Signal transduction mechanisms	PREDICTED: wee1-like protein kinase isoform X3 [Nomascus leucogenys]	biological process: cellular component organization or biogenesis (GO:0071840);; biological process: developmental process (GO:0032502);; biological process: single-organism process (GO:0044699);; biological process: metabolic process (GO:0008152);; biological process: cellular process (GO:0009987);; biological process: biological regulation (GO:0065007);; molecular function: catalytic activity (…
ENSG00000087586	AURKA	110.515	8442	157.15	10800	79.674	5690	134.495	9508	59.7596	3796	117.343	7737	0.00206123	0.708663	up	[T]	Signal transduction mechanisms	--	K11481|0|hsa:6790|K11481 aurora kinase A [EC:2.7.11.1] | (RefSeq) AURKA, AIK, ARK1, AURA, BTAK, PPP1R47, STK15, STK6, STK7; aurora kinase A	Oocyte meiosis (ko04114)	[D]	Cell cycle control, cell division, chromosome partitioning	Protein kinase domain;; Protein tyrosine kinase;; Kinase-like	Aurora kinase A OS=Homo sapiens OX=9606 GN=AURKA PE=1 SV=2	T	Signal transduction mechanisms	PREDICTED: aurora kinase A isoform X1 [Homo sapiens]	--
ENSG00000124762	CDKN1A	44.9334	4175	80.9231	7256	41.5514	3500	45.2376	3886	40.4015	3420	91.6817	7292	0.000590358	0.803016	up	--	--	Biological Process: G2/M transition of mitotic cell cycle (GO:0000086);; Cellular Component: cyclin-dependent protein kinase holoenzyme complex (GO:0000307);; Molecular Function: cyclin-dependent protein serine/threonine kinase inhibitor activity (GO:0004861);; Cellular Component: nucleoplasm (GO:0005654);; Cellular Component: cytosol (GO:0005829);; Biological Process: DNA damage response, signal…	K06625|2.10663e-93|ptr:104001067|K06625 cyclin-dependent kinase inhibitor 1A | (RefSeq) CDKN1A; cyclin dependent kinase inhibitor 1A	Endocrine resistance (ko01522);; Platinum drug resistance (ko01524);; ErbB signaling pathway (ko04012);; HIF-1 signaling pathway (ko04066);; FoxO signaling pathway (ko04068);; Cell cycle (ko04110);; p53 signaling pathway (ko04115);; PI3K-Akt signaling pathway (ko04151);; Jak-STAT signaling pathway (ko04630);; Oxytocin signaling pathway (ko04921);; Hepatitis C (ko05160);; Hepatitis B (ko05161);; H…	[T]	Signal transduction mechanisms	Cyclin-dependent kinase inhibitor	Cyclin-dependent kinase inhibitor 1 OS=Homo sapiens OX=9606 GN=CDKN1A PE=1 SV=3	T	Signal transduction mechanisms	Cyclin-dependent kinase variant, partial [Homo sapiens]	biological process: metabolic process (GO:0008152);; biological process: cellular process (GO:0009987);; biological process: multicellular organismal process (GO:0032501);; biological process: developmental process (GO:0032502);; biological process: single-organism process (GO:0044699);; biological process: signaling (GO:0023052);; biological process: biological regulation (GO:0065007);; biologic…
ENSG00000173039	RELA	22.63	2465	44.0534	4800	21.4915	2144	36.3669	3868	38.3194	3754	37.6613	3597	0.00566442	0.601148	up	--	--	Biological Process: negative regulation of transcription from RNA polymerase II promoter (GO:0000122);; Molecular Function: RNA polymerase II core promoter proximal region sequence-specific DNA binding (GO:0000978);; Molecular Function: RNA polymerase II distal enhancer sequence-specific DNA binding (GO:0000980);; Molecular Function: transcriptional activator activity, RNA polymerase II core prom…	K04735|0|hsa:5970|K04735 transcription factor p65 | (RefSeq) RELA, NFKB3, p65; RELA proto-oncogene, NF-kB subunit	MAPK signaling pathway (ko04010);; Ras signaling pathway (ko04014);; cAMP signaling pathway (ko04024);; Chemokine signaling pathway (ko04062);; NF-kappa B signaling pathway (ko04064);; HIF-1 signaling pathway (ko04066);; Sphingolipid signaling pathway (ko04071);; PI3K-Akt signaling pathway (ko04151);; Apoptosis (ko04210);; Longevity regulating pathway (ko04211);; Osteoclast differentiation (ko043…	--	--	Rel homology DNA-binding domain;; Rel homology dimerisation domain	Transcription factor p65 OS=Homo sapiens OX=9606 GN=RELA PE=1 SV=2	K	Transcription	RELA protein [Homo sapiens]	cellular component: organelle part (GO:0044422);; cellular component: cell (GO:0005623);; cellular component: macromolecular complex (GO:0032991);; cellular component: organelle (GO:0043226);; cellular component: cell part (GO:0044464);; molecular function: nucleic acid binding transcription factor activity (GO:0001071);; molecular function: binding (GO:0005488);; biological process: multi-organi…
ENSG00000130066	SAT1	5.87936	255	7.46951	297	7.17374	274	11.5554	474	6.63939	262	11.9126	418	0.0331415	0.648172	up	[J]	Translation, ribosomal structure and biogenesis	Biological Process: neurotransmitter uptake (GO:0001504);; Biological Process: angiogenesis (GO:0001525);; Molecular Function: diamine N-acetyltransferase activity (GO:0004145);; Molecular Function: chloride channel activity (GO:0005254);; Molecular Function: sodium:amino acid symporter activity (GO:0005283);; Molecular Function: L-histidine transmembrane transporter activity (GO:0005290);; Molec…	K00657|5.96954e-122|ptr:465538|K00657 diamine N-acetyltransferase [EC:2.3.1.57] | (RefSeq) SAT; diamine acetyltransferase 1	Arginine and proline metabolism (ko00330)	[E]	Amino acid transport and metabolism	Acetyltransferase (GNAT) family;; Acetyltransferase (GNAT) domain;; Acetyltransferase (GNAT) domain	Diamine acetyltransferase 1 OS=Homo sapiens OX=9606 GN=SAT1 PE=1 SV=1	K	Transcription	diamine acetyltransferase 1 [Homo sapiens]	cellular component: extracellular region (GO:0005576);; cellular component: extracellular region part (GO:0044421);; cellular component: cell (GO:0005623);; cellular component: membrane part (GO:0044425);; cellular component: organelle (GO:0043226);; cellular component: cell part (GO:0044464);; cellular component: membrane (GO:0016020);; molecular function: binding (GO:0005488);; molecular functi…
ENSG00000125743	SNRPD2	90.0166	2772	71.3064	2544	42.7159	1393	97.0161	3241	45.5105	1469	78.6366	2513	0.00704246	0.628428	up	--	--	--	K11096|2.33028e-57|nve:NEMVE_v1g247177|K11096 small nuclear ribonucleoprotein D2 | (RefSeq) hypothetical protein	Spliceosome (ko03040)	[A]	RNA processing and modification	LSM domain	Small nuclear ribonucleoprotein Sm D2 OS=Homo sapiens OX=9606 GN=SNRPD2 PE=1 SV=1	K	Transcription	small nuclear ribonucleoprotein Sm D2 [Aotus nancymaae]	--
ENSG00000198517	MAFK	35.5279	4334	87.5232	11275	78.2615	8881	105.709	13453	74.6452	9241	103.644	12098	0.00298242	0.757771	up	--	--	Molecular Function: transcription regulatory region sequence-specific DNA binding (GO:0000976);; Molecular Function: transcription cofactor binding (GO:0001221);; Molecular Function: transcriptional activator activity, RNA polymerase II transcription regulatory region sequence-specific binding (GO:0001228);; Biological Process: in utero embryonic development (GO:0001701);; Molecular Function: GTP…	--	--	[K]	Transcription	bZIP Maf transcription factor	Transcription factor MafK OS=Homo sapiens OX=9606 GN=MAFK PE=1 SV=1	K	Transcription	PREDICTED: LOW QUALITY PROTEIN: uncharacterized protein LOC106634934 [Pan paniscus]	molecular function: nucleic acid binding transcription factor activity (GO:0001071);; molecular function: binding (GO:0005488);; biological process: behavior (GO:0007610);; biological process: developmental process (GO:0032502);; biological process: single-organism process (GO:0044699);; biological process: multicellular organismal process (GO:0032501);; biological process: biological regulation …
ENSG00000125740	FOSB	2.26058	272	3.73459	477	2.09251	263	3.11009	384	2.13261	245	3.75786	447	0.00402077	0.805993	up	--	--	--	K09029|3.78054e-136|pps:100989480|K09029 protein FosB | (RefSeq) FOSB; FosB proto-oncogene, AP-1 transcription factor subunit	Osteoclast differentiation (ko04380);; Cocaine addiction (ko05030);; Amphetamine addiction (ko05031);; Alcoholism (ko05034)	[K]	Transcription	bZIP transcription factor;; Basic region leucine zipper;; bZIP Maf transcription factor	Protein fosB OS=Homo sapiens OX=9606 GN=FOSB PE=1 SV=1	K	Transcription	protein fosB isoform 1 [Homo sapiens]	--
ENSG00000157514	TSC22D3	2.18694	182	2.46613	194	1.86822	136	4.21295	329	1.89389	145	3.81831	271	0.0137856	0.843228	up	--	--	--	--	--	[K]	Transcription	TSC-22/dip/bun family	TSC22 domain family protein 3 OS=Homo sapiens OX=9606 GN=TSC22D3 PE=1 SV=2	K	Transcription	PREDICTED: TSC22 domain family protein 3 isoform X1 [Chlorocebus sabaeus]	--
ENSG00000170345	FOS	9.52069	622	12.4103	903	6.47201	464	13.9535	911	6.82763	490	16.4567	949	9.50034e-05	0.875295	up	--	--	Molecular Function: RNA polymerase II core promoter proximal region sequence-specific DNA binding (GO:0000978);; Molecular Function: RNA polymerase II core promoter sequence-specific DNA binding (GO:0000979);; Molecular Function: transcriptional activator activity, RNA polymerase II core promoter proximal region sequence-specific binding (GO:0001077);; Biological Process: conditioned taste aversi…	K04379|0|hsa:2353|K04379 proto-oncogene protein c-fos | (RefSeq) FOS, AP-1, C-FOS, p55; Fos proto-oncogene, AP-1 transcription factor subunit	Endocrine resistance (ko01522);; MAPK signaling pathway (ko04010);; cAMP signaling pathway (ko04024);; Apoptosis (ko04210);; Osteoclast differentiation (ko04380);; Toll-like receptor signaling pathway (ko04620);; T cell receptor signaling pathway (ko04660);; B cell receptor signaling pathway (ko04662);; TNF signaling pathway (ko04668);; Circadian entrainment (ko04713);; Cholinergic synapse (ko047…	[K]	Transcription	bZIP transcription factor;; Basic region leucine zipper;; bZIP Maf transcription factor	Proto-oncogene c-Fos OS=Homo sapiens OX=9606 GN=FOS PE=1 SV=1	K	Transcription	proto-oncogene c-Fos [Homo sapiens]	molecular function: binding (GO:0005488);; molecular function: nucleic acid binding transcription factor activity (GO:0001071);; biological process: response to stimulus (GO:0050896);; biological process: behavior (GO:0007610);; biological process: biological regulation (GO:0065007);; biological process: signaling (GO:0023052);; biological process: multi-organism process (GO:0051704);; biological…
ENSG00000153234	NR4A2	5.23643	690	5.21849	574	9.77618	1209	29.9331	2628	8.31902	909	25.3053	2083	0.0174863	0.972403	up	--	--	Biological Process: negative regulation of transcription from RNA polymerase II promoter (GO:0000122);; Molecular Function: RNA polymerase II core promoter sequence-specific DNA binding (GO:0000979);; Molecular Function: transcriptional activator activity, RNA polymerase II core promoter proximal region sequence-specific binding (GO:0001077);; Biological Process: response to hypoxia (GO:0001666);…	K08558|0|ssc:100157120|K08558 nuclear receptor subfamily 4 group A member 2 | (RefSeq) NR4A2; nuclear receptor subfamily 4 group A member 2	Aldosterone synthesis and secretion (ko04925)	[K]	Transcription	Zinc finger, C4 type (two domains);; Ligand-binding domain of nuclear hormone receptor	Nuclear receptor subfamily 4 group A member 2 OS=Homo sapiens OX=9606 GN=NR4A2 PE=1 SV=1	K	Transcription	PREDICTED: nuclear receptor subfamily 4 group A member 2 isoform X1 [Homo sapiens]	molecular function: binding (GO:0005488);; molecular function: nucleic acid binding transcription factor activity (GO:0001071);; molecular function: signal transducer activity (GO:0004871);; molecular function: molecular transducer activity (GO:0060089);; biological process: locomotion (GO:0040011);; biological process: cellular process (GO:0009987);; biological process: metabolic process (GO:000…
ENSG00000172733	PURG	0.782866	40	1.06283	47	0.953057	42	2.32814	111	0.878503	37	2.71628	119	0.00657589	1.28852	up	--	--	Molecular Function: DNA binding (GO:0003677);; Cellular Component: nucleus (GO:0005634);; Molecular Function: RNA binding (GO:0044822);;	--	--	[K]	Transcription	PurA ssDNA and RNA-binding protein	Purine-rich element-binding protein gamma OS=Homo sapiens OX=9606 GN=PURG PE=2 SV=1	K	Transcription	purine-rich element-binding protein gamma isoform A [Homo sapiens]	molecular function: binding (GO:0005488);; cellular component: cell part (GO:0044464);; cellular component: organelle (GO:0043226);; cellular component: cell (GO:0005623);;
ENSG00000115364	MRPL19	11.9298	1291	24.4645	1684	11.8232	1209	18.1224	2373	25.9144	1501	16.1392	1955	0.00117936	0.644187	up	[J]	Translation, ribosomal structure and biogenesis	--	K02884|0|pps:100979894|K02884 large subunit ribosomal protein L19 | (RefSeq) MRPL19; mitochondrial ribosomal protein L19	Ribosome (ko03010)	[J]	Translation, ribosomal structure and biogenesis	Ribosomal protein L19	39S ribosomal protein L19, mitochondrial OS=Homo sapiens OX=9606 GN=MRPL19 PE=1 SV=2	J	Translation, ribosomal structure and biogenesis	39S ribosomal protein L19, mitochondrial [Homo sapiens]	--

## Sheet: BMK 8h DMSO vs 8h LY2606368
#ID	gene_name	T03_FPKM	T03_count	T06_FPKM	T06_count	T09_FPKM	T09_count	T12_FPKM	T12_count	T15_FPKM	T15_count	T18_FPKM	T18_count	Pvalue	log2FC	regulated	COG_class	COG_class_annotation	GO_annotation	KEGG_annotation	KEGG_pathway_annotation	KOG_class	KOG_class_annotation	Pfam_annotation	Swiss_Prot_annotation	eggNOG_class	eggNOG_class_annotation	NR_annotation	GO_second_level_annotation
Human_newGene_26321	--	0.160789	54	0.212556	72	0.896157	196	0.347218	118	1.19004	415	0.23201	91	0.0323084	-1.19477	down	--	--	--	--	--	--	--	--	Putative uncharacterized protein FLJ38264 OS=Homo sapiens OX=9606 PE=5 SV=1	--	--	PREDICTED: MAPK-interacting and spindle-stabilizing protein-like, partial [Homo sapiens]	--
Human_newGene_4942	--	0.133954	22	0.112982	35	0.657665	105	0.277543	38	0.761535	159	0.27229	40	0.024582	-1.32106	down	--	--	--	--	--	--	--	--	--	--	--	--	--
ENSG00000109099	PMP22	4.42697	280	4.9495	326	7.80233	416	3.86663	242	11.1358	772	4.48339	307	0.0356889	-0.731363	down	--	--	Molecular Function: protein binding (GO:0005515);; Cellular Component: peroxisomal membrane (GO:0005778);; Cellular Component: plasma membrane (GO:0005886);; Cellular Component: bicellular tight junction (GO:0005923);; Biological Process: cell cycle arrest (GO:0007050);; Biological Process: chemical synaptic transmission (GO:0007268);; Biological Process: peripheral nervous system development (GO…	K19289|1.64107e-78|ptr:744977|K19289 peripheral myelin protein 22 | (RefSeq) PMP22; peripheral myelin protein 22	--	--	--	PMP-22/EMP/MP20/Claudin family	Peripheral myelin protein 22 OS=Homo sapiens OX=9606 GN=PMP22 PE=1 SV=1	--	--	peripheral myelin protein 22, isoform CRA_a [Homo sapiens]	biological process: single-organism process (GO:0044699);; biological process: developmental process (GO:0032502);; biological process: multicellular organismal process (GO:0032501);; biological process: cellular component organization or biogenesis (GO:0071840);; biological process: biological regulation (GO:0065007);; biological process: signaling (GO:0023052);; biological process: cellular pro…
Human_newGene_43073	--	0.104001	42	0.05337	28	0.198107	94	0.135225	66	0.397876	185	0.070636	43	0.033086	-1.18392	down	--	--	--	--	--	--	--	--	--	--	--	uncharacterized protein LOC103886823 isoform X2 [Papio anubis]	--
Human_newGene_39656	--	0.234939	69	0.421522	26	0.425883	100	0.285629	66	0.898636	217	0.316286	60	0.0114122	-1.31251	down	--	--	--	--	--	--	--	--	Zinc finger protein ENSP00000375192 OS=Homo sapiens OX=9606 PE=2 SV=1	--	--	PREDICTED: uncharacterized protein LOC105592224 [Cercocebus atys]	--
Human_newGene_39439	--	0.438836	42	0.321229	31	1.1163	102	0.465681	34	1.49731	151	0.535471	62	0.0175861	-1.22464	down	--	--	Molecular Function: DNA binding (GO:0003677);; Cellular Component: nucleus (GO:0005634);; Biological Process: regulation of transcription, DNA-templated (GO:0006355);; Molecular Function: metal ion binding (GO:0046872);;	--	--	--	--	--	Putative uncharacterized protein encoded by LINC00269 OS=Homo sapiens OX=9606 GN=LINC00269 PE=5 SV=1	--	--	similar to zinc finger protein 569, isoform CRA_a [Homo sapiens]	cellular component: cell (GO:0005623);; cellular component: cell part (GO:0044464);; cellular component: organelle (GO:0043226);; biological process: biological regulation (GO:0065007);; molecular function: binding (GO:0005488);;
ENSG00000175643	RMI2	7.33465	407	5.8351	369	13.1234	682	6.00588	342	10.6628	622	6.50556	427	0.0374093	-0.615418	down	--	--	Biological Process: DNA synthesis involved in DNA repair (GO:0000731);; Biological Process: strand displacement (GO:0000732);; Molecular Function: DNA binding (GO:0003677);; Cellular Component: nucleoplasm (GO:0005654);; Cellular Component: cytoplasm (GO:0005737);; Biological Process: DNA replication (GO:0006260);; Biological Process: regulation of signal transduction by p53 class mediator (GO:19…	K15365|1.14342e-24|cjc:100385843|K15365 RecQ-mediated genome instability protein 2 | (RefSeq) recQ-mediated genome instability protein 2	Fanconi anemia pathway (ko03460)	--	--	RecQ-mediated genome instability protein 2	RecQ-mediated genome instability protein 2 OS=Homo sapiens OX=9606 GN=RMI2 PE=1 SV=2	--	--	C16orf75 protein [Homo sapiens]	cellular component: organelle (GO:0043226);; cellular component: cell part (GO:0044464);; cellular component: cell (GO:0005623);; cellular component: organelle part (GO:0044422);; biological process: biological regulation (GO:0065007);; biological process: cellular process (GO:0009987);; biological process: metabolic process (GO:0008152);; molecular function: binding (GO:0005488);;
Human_newGene_47403	--	2.24467	271	2.38802	292	2.77503	314	1.28853	160	4.68936	596	1.88072	269	0.0473948	-0.706268	down	--	--	Biological Process: negative regulation of transcription from RNA polymerase II promoter (GO:0000122);; Cellular Component: nuclear chromatin (GO:0000790);; Biological Process: in utero embryonic development (GO:0001701);; Biological Process: maternal placenta development (GO:0001893);; Molecular Function: steroid hormone receptor activity (GO:0003707);; Molecular Function: transcription coactiva…	--	--	--	--	--	--	--	--	ORF-3 [Homo sapiens]	molecular function: signal transducer activity (GO:0004871);; molecular function: nucleic acid binding transcription factor activity (GO:0001071);; molecular function: molecular transducer activity (GO:0060089);; molecular function: binding (GO:0005488);; molecular function: transcription factor activity, protein binding (GO:0000988);; biological process: multicellular organismal process (GO:0032…
Human_newGene_47468	--	0.429774	45	0.527198	56	0.822247	81	0.351503	38	1.03392	114	0.178456	23	0.0493709	-1.01337	down	--	--	--	--	--	--	--	--	--	--	--	PREDICTED: uncharacterized protein LOC104008052 [Pan troglodytes]	--
Human_newGene_10008	--	1.31579	168	2.54451	230	1.92179	394	1.14441	173	1.80849	518	0.990939	175	0.0239196	-0.895257	down	--	--	Molecular Function: protein binding (GO:0005515);; Cellular Component: nucleolus (GO:0005730);; Cellular Component: plasma membrane (GO:0005886);; Cellular Component: cytoplasmic vesicle (GO:0031410);;	--	--	--	--	--	UPF0764 protein C16orf89 OS=Homo sapiens OX=9606 GN=C16orf89 PE=1 SV=2	--	--	hypothetical protein EGM_09449, partial [Macaca fascicularis]	cellular component: cell (GO:0005623);; cellular component: organelle part (GO:0044422);; cellular component: membrane (GO:0016020);; cellular component: organelle (GO:0043226);; cellular component: cell part (GO:0044464);; molecular function: binding (GO:0005488);;
Human_newGene_12708	--	2.5561	293	1.20652	195	3.21762	311	1.6664	195	2.45662	354	1.71591	234	0.040589	-0.636117	down	--	--	Molecular Function: aminomethyltransferase activity (GO:0004047);; Cellular Component: mitochondrial matrix (GO:0005759);; Biological Process: glycine catabolic process (GO:0006546);; Biological Process: regulation of acetyl-CoA biosynthetic process from pyruvate (GO:0010510);; Molecular Function: oxidoreductase activity (GO:0016491);; Biological Process: oxidation-reduction process (GO:0055114);;	K17509|0|hsa:55066|K17509 pyruvate dehydrogenase phosphatase regulatory subunit | (RefSeq) PDPR, PDP3; pyruvate dehydrogenase phosphatase regulatory subunit	--	[E]	Amino acid transport and metabolism	Aminomethyltransferase folate-binding domain;; FAD dependent oxidoreductase;; FAD dependent oxidoreductase central domain;; Pyridine nucleotide-disulphide oxidoreductase;; FAD binding domain	Pyruvate dehydrogenase phosphatase regulatory subunit, mitochondrial OS=Homo sapiens OX=9606 GN=PDPR PE=1 SV=2	E	Amino acid transport and metabolism	PREDICTED: pyruvate dehydrogenase phosphatase regulatory subunit, mitochondrial isoform X3 [Homo sapiens]	cellular component: cell part (GO:0044464);; cellular component: organelle (GO:0043226);; cellular component: organelle part (GO:0044422);; cellular component: cell (GO:0005623);; cellular component: membrane-enclosed lumen (GO:0031974);; molecular function: catalytic activity (GO:0003824);; biological process: single-organism process (GO:0044699);; biological process: biological regulation (GO:0…
Human_newGene_13853	--	1.16405	72	0.449977	21	1.687	68	0.959324	45	1.36358	95	0.464849	33	0.0088249	-1.23847	down	--	--	Biological Process: protein polyubiquitination (GO:0000209);; Biological Process: antigen processing and presentation of peptide antigen via MHC class I (GO:0002474);; Molecular Function: aminopeptidase activity (GO:0004177);; Cellular Component: nucleus (GO:0005634);; Cellular Component: cytosol (GO:0005829);; Biological Process: proteolysis (GO:0006508);; Molecular Function: metallopeptidase ac…	--	--	[EO]	Amino acid transport and metabolism;; Posttranslational modification, protein turnover, chaperones	Peptidase family M1 domain	Puromycin-sensitive aminopeptidase-like protein OS=Homo sapiens OX=9606 GN=NPEPPSL1 PE=2 SV=3	E	Amino acid transport and metabolism	PREDICTED: puromycin-sensitive aminopeptidase [Propithecus coquereli]	molecular function: catalytic activity (GO:0003824);; molecular function: binding (GO:0005488);; biological process: cellular process (GO:0009987);; biological process: metabolic process (GO:0008152);; biological process: response to stimulus (GO:0050896);; biological process: immune system process (GO:0002376);; cellular component: cell part (GO:0044464);; cellular component: organelle (GO:00432…
ENSG00000117394	SLC2A1	11.8353	1602	10.8468	1460	12.3597	1561	6.39359	820	18.5557	2641	8.0618	1220	0.00511412	-0.729379	down	[G]	Carbohydrate transport and metabolism	Cellular Component: Golgi membrane (GO:0000139);; Cellular Component: female pronucleus (GO:0001939);; Cellular Component: cytosol (GO:0005829);; Cellular Component: integral component of plasma membrane (GO:0005887);; Cellular Component: caveola (GO:0005901);; Cellular Component: cell-cell junction (GO:0005911);; Biological Process: lactose biosynthetic process (GO:0005989);; Biological Process:…	K07299|0|pps:100991584|K07299 MFS transporter, SP family, solute carrier family 2 (facilitated glucose transporter), member 1 | (RefSeq) SLC2A1; solute carrier family 2 member 1	HIF-1 signaling pathway (ko04066);; Insulin secretion (ko04911);; Thyroid hormone signaling pathway (ko04919);; Adipocytokine signaling pathway (ko04920);; Glucagon signaling pathway (ko04922);; Insulin resistance (ko04931);; Bile secretion (ko04976);; HTLV-I infection (ko05166);; Pathways in cancer (ko05200);; Renal cell carcinoma (ko05211);; Central carbon metabolism in cancer (ko05230)	[G]	Carbohydrate transport and metabolism	Sugar (and other) transporter;; Major Facilitator Superfamily	Solute carrier family 2, facilitated glucose transporter member 1 OS=Homo sapiens OX=9606 GN=SLC2A1 PE=1 SV=2	G	Carbohydrate transport and metabolism	solute carrier family 2 (facilitated glucose transporter), member 1 variant, partial [Homo sapiens]	cellular component: cell junction (GO:0030054);; cellular component: extracellular region (GO:0005576);; cellular component: membrane (GO:0016020);; cellular component: organelle (GO:0043226);; cellular component: cell part (GO:0044464);; cellular component: membrane part (GO:0044425);; cellular component: extracellular region part (GO:0044421);; cellular component: cell (GO:0005623);; cellular c…
ENSG00000114268	PFKFB4	1.47453	200	2.09936	289	4.23453	531	2.07472	260	7.58419	1071	2.09536	337	0.0199055	-0.999426	down	[E]	Amino acid transport and metabolism	--	K19030|0|pps:100978268|K19030 6-phosphofructo-2-kinase / fructose-2,6-biphosphatase 4 [EC:2.7.1.105 3.1.3.46] | (RefSeq) PFKFB4; 6-phosphofructo-2-kinase/fructose-2,6-biphosphatase 4	Fructose and mannose metabolism (ko00051);; AMPK signaling pathway (ko04152)	[G]	Carbohydrate transport and metabolism	6-phosphofructo-2-kinase;; Histidine phosphatase superfamily (branch 1);; AAA domain	6-phosphofructo-2-kinase/fructose-2,6-bisphosphatase 4 OS=Homo sapiens OX=9606 GN=PFKFB4 PE=2 SV=6	G	Carbohydrate transport and metabolism	6-phosphofructo-2-kinase/fructose-2,6-bisphosphatase 4 isoform b [Homo sapiens]	--
ENSG00000076351	SLC46A1	1.80209	425	1.68876	390	2.12242	413	1.14368	266	2.69043	644	1.14807	320	0.0424141	-0.601411	down	--	--	--	K14613|0|mcc:708727|K14613 MFS transporter, PCFT/HCP family, solute carrier family 46 (folate transporter), member 1 | (RefSeq) SLC46A1; solute carrier family 46 member 1	--	[R]	General function prediction only	Major Facilitator Superfamily	Proton-coupled folate transporter OS=Homo sapiens OX=9606 GN=SLC46A1 PE=1 SV=1	G	Carbohydrate transport and metabolism	PREDICTED: proton-coupled folate transporter [Macaca mulatta]	--
ENSG00000258674	AC011448.1	0.56844	24	0.824062	35	2.91964	114	0.410733	18	4.1565	183	0.408047	21	0.000981339	-2.09032	down	--	--	--	--	--	[CD]	Energy production and conversion;; Cell cycle control, cell division, chromosome partitioning	GRIM-19 protein;; YjeF-related protein N-terminus	YjeF N-terminal domain-containing protein 3 OS=Homo sapiens OX=9606 GN=YJEFN3 PE=1 SV=1	G	Carbohydrate transport and metabolism	unnamed protein product [Homo sapiens]	--
ENSG00000105173	CCNE1	11.1677	732	10.9217	727	24.2875	1278	10.5228	701	23.8726	1595	11.631	776	0.0101386	-0.714013	down	--	--	Biological Process: regulation of transcription involved in G1/S transition of mitotic cell cycle (GO:0000083);; Cellular Component: cyclin-dependent protein kinase holoenzyme complex (GO:0000307);; Biological Process: antral ovarian follicle growth (GO:0001547);; Biological Process: liver development (GO:0001889);; Molecular Function: transcription coactivator activity (GO:0003713);; Cellular Co…	K06626|0|hsa:898|K06626 cyclin E | (RefSeq) CCNE1, CCNE, pCCNE1; cyclin E1	Cell cycle (ko04110);; Oocyte meiosis (ko04114);; p53 signaling pathway (ko04115);; PI3K-Akt signaling pathway (ko04151);; Hepatitis B (ko05161);; Measles (ko05162);; Pathways in cancer (ko05200);; Viral carcinogenesis (ko05203);; MicroRNAs in cancer (ko05206);; Prostate cancer (ko05215);; Small cell lung cancer (ko05222)	[D]	Cell cycle control, cell division, chromosome partitioning	Cyclin, N-terminal domain;; Cyclin, C-terminal domain	G1/S-specific cyclin-E1 OS=Homo sapiens OX=9606 GN=CCNE1 PE=1 SV=2	D	Cell cycle control, cell division, chromosome partitioning	G1/S-specific cyclin-E1 isoform 1 [Homo sapiens]	biological process: response to stimulus (GO:0050896);; biological process: biological regulation (GO:0065007);; biological process: signaling (GO:0023052);; biological process: rhythmic process (GO:0048511);; biological process: reproductive process (GO:0022414);; biological process: reproduction (GO:0000003);; biological process: multicellular organismal process (GO:0032501);; biological proces…
ENSG00000268651	CTAG1A	4.52506	129	0.330761	13	6.04354	162	1.7331	68	3.84235	140	2.35895	106	0.0281929	-1.25381	down	--	--	Molecular Function: protein binding (GO:0005515);; Cellular Component: cytoplasm (GO:0005737);; Cellular Component: centrosome (GO:0005813);;	--	--	--	--	--	Cancer/testis antigen 2 OS=Homo sapiens OX=9606 GN=CTAG2 PE=1 SV=2	D	Cell cycle control, cell division, chromosome partitioning	LOW QUALITY PROTEIN: CTAG1A isoform 1 [Pan troglodytes]	molecular function: binding (GO:0005488);; cellular component: cell part (GO:0044464);; cellular component: organelle (GO:0043226);; cellular component: cell (GO:0005623);; cellular component: organelle part (GO:0044422);;
ENSG00000175305	CCNE2	1.74352	120	1.07878	138	2.99489	285	2.3063	164	4.35646	454	1.236	152	0.0350523	-0.900198	down	--	--	Biological Process: cell cycle checkpoint (GO:0000075);; Biological Process: regulation of cyclin-dependent protein serine/threonine kinase activity (GO:0000079);; Biological Process: G1/S transition of mitotic cell cycle (GO:0000082);; Cellular Component: nucleoplasm (GO:0005654);; Cellular Component: cytosol (GO:0005829);; Biological Process: DNA replication initiation (GO:0006270);; Molecular …	K06626|0|hsa:9134|K06626 cyclin E | (RefSeq) CCNE2, CYCE2; cyclin E2	Cell cycle (ko04110);; Oocyte meiosis (ko04114);; p53 signaling pathway (ko04115);; PI3K-Akt signaling pathway (ko04151);; Hepatitis B (ko05161);; Measles (ko05162);; Pathways in cancer (ko05200);; Viral carcinogenesis (ko05203);; MicroRNAs in cancer (ko05206);; Prostate cancer (ko05215);; Small cell lung cancer (ko05222)	[D]	Cell cycle control, cell division, chromosome partitioning	Cyclin, N-terminal domain;; Cyclin, C-terminal domain	G1/S-specific cyclin-E2 OS=Homo sapiens OX=9606 GN=CCNE2 PE=1 SV=1	D	Cell cycle control, cell division, chromosome partitioning	G1/S-specific cyclin-E2 [Homo sapiens]	molecular function: molecular function regulator (GO:0098772);; molecular function: binding (GO:0005488);; biological process: single-organism process (GO:0044699);; biological process: cellular process (GO:0009987);; biological process: metabolic process (GO:0008152);; biological process: biological regulation (GO:0065007);; cellular component: cell (GO:0005623);; cellular component: organelle p…
ENSG00000182963	GJC1	3.26932	319	3.25409	396	7.19472	815	4.58361	504	12.0869	1779	3.01586	368	0.00781642	-1.1502	down	--	--	Biological Process: vasculogenesis (GO:0001570);; Molecular Function: ion channel activity (GO:0005216);; Molecular Function: gap junction channel activity (GO:0005243);; Molecular Function: protein binding (GO:0005515);; Cellular Component: endoplasmic reticulum membrane (GO:0005789);; Cellular Component: integral component of plasma membrane (GO:0005887);; Cellular Component: connexin complex (…	K07616|0|ptr:454736|K07616 gap junction protein, alpha 7 | (RefSeq) GJC1, GJA7; gap junction protein gamma 1	--	--	--	Connexin	Gap junction gamma-1 protein OS=Homo sapiens OX=9606 GN=GJC1 PE=1 SV=2	D	Cell cycle control, cell division, chromosome partitioning	gap junction gamma-1 protein [Homo sapiens]	molecular function: binding (GO:0005488);; molecular function: transporter activity (GO:0005215);; biological process: developmental process (GO:0032502);; biological process: multicellular organismal process (GO:0032501);; biological process: single-organism process (GO:0044699);; biological process: cellular component organization or biogenesis (GO:0071840);; biological process: cellular proces…
ENSG00000164045	CDC25A	3.54788	420	3.23297	404	5.18982	601	2.48483	315	6.86156	866	2.50937	375	0.00874026	-0.785283	down	--	--	Biological Process: regulation of cyclin-dependent protein serine/threonine kinase activity (GO:0000079);; Biological Process: G1/S transition of mitotic cell cycle (GO:0000082);; Biological Process: G2/M transition of mitotic cell cycle (GO:0000086);; Molecular Function: protein tyrosine phosphatase activity (GO:0004725);; Cellular Component: nucleoplasm (GO:0005654);; Cellular Component: cytoso…	K06645|0|hsa:993|K06645 M-phase inducer phosphatase 1 [EC:3.1.3.48] | (RefSeq) CDC25A, CDC25A2; cell division cycle 25A	Cell cycle (ko04110);; Progesterone-mediated oocyte maturation (ko04914);; MicroRNAs in cancer (ko05206)	[D]	Cell cycle control, cell division, chromosome partitioning	M-phase inducer phosphatase;; Rhodanese-like domain	M-phase inducer phosphatase 1 OS=Homo sapiens OX=9606 GN=CDC25A PE=1 SV=2	D	Cell cycle control, cell division, chromosome partitioning	M-phase inducer phosphatase 1 isoform a [Homo sapiens]	cellular component: cell (GO:0005623);; cellular component: organelle part (GO:0044422);; cellular component: organelle (GO:0043226);; cellular component: cell part (GO:0044464);; biological process: single-organism process (GO:0044699);; biological process: response to stimulus (GO:0050896);; biological process: biological regulation (GO:0065007);; biological process: metabolic process (GO:00081…
ENSG00000179051	RCC2	10.4594	1598	10.7597	1661	16.9816	2427	9.77675	1523	22.0331	3563	10.323	1863	0.0220949	-0.587497	down	[DZ]	Cell cycle control, cell division, chromosome partitioning;; Cytoskeleton	Cellular Component: nucleolus (GO:0005730);; Cellular Component: cytosol (GO:0005829);; Cellular Component: microtubule (GO:0005874);; Cellular Component: plasma membrane (GO:0005886);; Biological Process: sister chromatid cohesion (GO:0007062);; Biological Process: mitotic cell cycle (GO:0007067);; Biological Process: integrin-mediated signaling pathway (GO:0007229);; Molecular Function: microtu…	--	--	[S]	Function unknown	Regulator of chromosome condensation (RCC1) repeat;; Regulator of chromosome condensation (RCC1) repeat	Protein RCC2 OS=Homo sapiens OX=9606 GN=RCC2 PE=1 SV=2	DZ	Cell cycle control, cell division, chromosome partitioning;; Cytoskeleton	protein RCC2 isoform X1 [Papio anubis]	molecular function: binding (GO:0005488);; biological process: cellular process (GO:0009987);; biological process: signaling (GO:0023052);; biological process: biological regulation (GO:0065007);; biological process: localization (GO:0051179);; biological process: response to stimulus (GO:0050896);; biological process: cellular component organization or biogenesis (GO:0071840);; biological proces…
ENSG00000148154	UGCG	0.936069	142	0.934576	144	1.34484	192	0.787186	123	2.76177	442	0.908116	163	0.0439378	-0.827705	down	[N]	Cell motility	--	K00720|0|ptr:464660|K00720 ceramide glucosyltransferase [EC:2.4.1.80] | (RefSeq) UGCG; UDP-glucose ceramide glucosyltransferase	Sphingolipid metabolism (ko00600)	[IM]	Lipid transport and metabolism;; Cell wall/membrane/envelope biogenesis	Glycosyl transferase family 21;; Glycosyltransferase like family 2;; Glycosyl transferase family group 2	Ceramide glucosyltransferase OS=Homo sapiens OX=9606 GN=UGCG PE=1 SV=1	M	Cell wall/membrane/envelope biogenesis	ceramide glucosyltransferase [Microcebus murinus]	--
ENSG00000100281	HMGXB4	4.53388	572	4.60713	635	9.40334	1040	4.7716	632	13.3573	1710	5.15843	711	0.0192871	-0.735385	down	--	--	--	K11298|0|hsa:10042|K11298 high mobility group protein 2-like 1 | (RefSeq) HMGXB4, HMG2L1, HMGBCG, THC211630; HMG-box containing 4	--	--	--	Domain of unknown function (DUF4171);; HMG (high mobility group) box;; HMG-box domain	HMG domain-containing protein 4 OS=Homo sapiens OX=9606 GN=HMGXB4 PE=1 SV=2	B	Chromatin structure and dynamics	HMG domain-containing protein 4 [Homo sapiens]	--
ENSG00000184898	RBM43	0.642129	65	0.437734	71	1.19289	148	0.35583	49	2.06034	286	0.871414	101	0.0196397	-1.16901	down	--	--	Molecular Function: nucleotide binding (GO:0000166);; Molecular Function: RNA binding (GO:0003723);;	--	--	--	--	Nmi/IFP 35 domain (NID)	RNA-binding protein 43 OS=Homo sapiens OX=9606 GN=RBM43 PE=1 SV=1	B	Chromatin structure and dynamics	RNA-binding protein 43 [Homo sapiens]	molecular function: binding (GO:0005488);;
ENSG00000083168	KAT6A	1.33624	347	1.89133	478	3.37182	806	1.62647	398	4.39103	1215	1.76904	520	0.0325993	-0.757279	down	--	--	--	K11305|0|hsa:7994|K11305 histone acetyltransferase MYST3 [EC:2.3.1.48] | (RefSeq) KAT6A, MOZ, MRD32, MYST-3, MYST3, RUNXBP2, ZC2HC6A, ZNF220; lysine acetyltransferase 6A	Signaling pathways regulating pluripotency of stem cells (ko04550)	[B]	Chromatin structure and dynamics	MOZ/SAS family;; PHD-finger;; linker histone H1 and H5 family	Histone acetyltransferase KAT6A OS=Homo sapiens OX=9606 GN=KAT6A PE=1 SV=2	B	Chromatin structure and dynamics	histone acetyltransferase KAT6A isoform 1 [Homo sapiens]	--
ENSG00000177732	SOX12	2.64185	463	3.14774	559	4.82285	792	2.51497	453	6.76323	1249	2.92607	607	0.0446203	-0.625138	down	--	--	Biological Process: negative regulation of transcription from RNA polymerase II promoter (GO:0000122);; Molecular Function: RNA polymerase II core promoter sequence-specific DNA binding (GO:0000979);; Molecular Function: transcriptional activator activity, RNA polymerase II core promoter proximal region sequence-specific binding (GO:0001077);; Molecular Function: RNA polymerase II transcription c…	K09268|6.2987e-61|oas:105606202|K09268 transcription factor SOX4/11/12 (SOX group C) | (RefSeq) SOX12; SRY-box 12	--	[K]	Transcription	HMG (high mobility group) box;; HMG-box domain	Transcription factor SOX-12 OS=Homo sapiens OX=9606 GN=SOX12 PE=2 SV=2	B	Chromatin structure and dynamics	SOX22 protein [Homo sapiens]	biological process: metabolic process (GO:0008152);; biological process: cellular process (GO:0009987);; biological process: reproductive process (GO:0022414);; biological process: reproduction (GO:0000003);; biological process: multicellular organismal process (GO:0032501);; biological process: immune system process (GO:0002376);; biological process: single-organism process (GO:0044699);; biolog…
ENSG00000169375	SIN3A	2.96356	605	4.11915	895	7.12179	1481	3.82432	691	11.3188	2624	3.88011	913	0.0148232	-0.898084	down	--	--	--	K11644|0|hsa:25942|K11644 paired amphipathic helix protein Sin3a | (RefSeq) SIN3A, WITKOS; SIN3 transcription regulator family member A	Thyroid hormone signaling pathway (ko04919);; Huntington's disease (ko05016);; Transcriptional misregulation in cancer (ko05202)	[B]	Chromatin structure and dynamics	C-terminal domain of Sin3a protein;; Paired amphipathic helix repeat;; Sin3 family co-repressor	Paired amphipathic helix protein Sin3a OS=Homo sapiens OX=9606 GN=SIN3A PE=1 SV=2	B	Chromatin structure and dynamics	PREDICTED: paired amphipathic helix protein Sin3a isoform X1 [Pan troglodytes]	--
ENSG00000169925	BRD3	1.21121	259	1.51483	304	2.64816	519	1.21376	260	3.62005	816	1.44333	363	0.0300129	-0.778507	down	--	--	--	K11721|0|hsa:8019|K11721 bromodomain-containing protein 3 | (RefSeq) BRD3, ORFX, RING3L; bromodomain containing 3	--	[K]	Transcription	Bromodomain;; Bromodomain extra-terminal - transcription regulation	Bromodomain-containing protein 3 OS=Homo sapiens OX=9606 GN=BRD3 PE=1 SV=1	BK	Chromatin structure and dynamics;; Transcription	bromodomain-containing protein 3 [Homo sapiens]	--
ENSG00000100596	SPTLC2	2.46314	735	2.12658	655	3.29932	936	2.21981	704	4.65127	1509	1.91856	696	0.0218161	-0.618469	down	[H]	Coenzyme transport and metabolism	--	K00654|0|hsa:9517|K00654 serine palmitoyltransferase [EC:2.3.1.50] | (RefSeq) SPTLC2, HSN1C, LCB2, LCB2A, NSAN1C, SPT2, hLCB2a; serine palmitoyltransferase long chain base subunit 2	Sphingolipid metabolism (ko00600);; Sphingolipid signaling pathway (ko04071)	[O]	Posttranslational modification, protein turnover, chaperones	Aminotransferase class I and II	Serine palmitoyltransferase 2 OS=Homo sapiens OX=9606 GN=SPTLC2 PE=1 SV=1	H	Coenzyme transport and metabolism	serine palmitoyltransferase 2 [Homo sapiens]	--
ENSG00000163738	MTHFD2L	4.456	349	2.09435	175	3.11579	201	0.744769	64	3.09037	145	1.46783	141	0.0453217	-0.924702	down	[H]	Coenzyme transport and metabolism	--	K13403|0|pps:100974548|K13403 methylenetetrahydrofolate dehydrogenase(NAD+) / 5,10-methenyltetrahydrofolate cyclohydrolase [EC:1.5.1.15 3.5.4.9] | (RefSeq) MTHFD2L; methylenetetrahydrofolate dehydrogenase (NADP+ dependent) 2-like	One carbon pool by folate (ko00670)	[H]	Coenzyme transport and metabolism	Tetrahydrofolate dehydrogenase/cyclohydrolase, NAD(P)-binding domain;; Tetrahydrofolate dehydrogenase/cyclohydrolase, catalytic domain	Probable bifunctional methylenetetrahydrofolate dehydrogenase/cyclohydrolase 2 OS=Homo sapiens OX=9606 GN=MTHFD2L PE=2 SV=3	H	Coenzyme transport and metabolism	PREDICTED: probable bifunctional methylenetetrahydrofolate dehydrogenase/cyclohydrolase 2 isoform X2 [Pan troglodytes]	--
ENSG00000152782	PANK1	0.133249	35	0.238998	63	0.765113	184	0.256255	65	0.883707	244	0.259641	82	0.0428398	-1.13784	down	--	--	--	K09680|0|cjc:100407841|K09680 type II pantothenate kinase [EC:2.7.1.33] | (RefSeq) PANK1; pantothenate kinase 1	Pantothenate and CoA biosynthesis (ko00770)	[H]	Coenzyme transport and metabolism	Fumble	Pantothenate kinase 1 OS=Homo sapiens OX=9606 GN=PANK1 PE=1 SV=2	H	Coenzyme transport and metabolism	PANK1 isoform 1 [Pongo abelii]	--
ENSG00000138771	SHROOM3	0.375104	157	0.311051	132	0.661763	259	0.35953	154	0.83195	366	0.310433	154	0.0278239	-0.824002	down	--	--	Biological Process: neural tube closure (GO:0001843);; Biological Process: epithelial cell development (GO:0002064);; Cellular Component: cytoplasm (GO:0005737);; Cellular Component: microtubule (GO:0005874);; Cellular Component: adherens junction (GO:0005912);; Biological Process: pattern specification process (GO:0007389);; Biological Process: regulation of cell shape (GO:0008360);; Cellular Co…	K18625|0|hsa:57619|K18625 protein Shroom | (RefSeq) SHROOM3, APXL3, MSTP013, SHRM, ShrmL; shroom family member 3	Tight junction (ko04530)	--	--	Apx/Shroom domain ASD2;; Apx/Shroom domain ASD1;; PDZ domain (Also known as DHR or GLGF)	Protein Shroom3 OS=Homo sapiens OX=9606 GN=SHROOM3 PE=1 SV=2	Z	Cytoskeleton	protein Shroom3 [Homo sapiens]	biological process: biological regulation (GO:0065007);; biological process: cellular process (GO:0009987);; biological process: single-organism process (GO:0044699);; biological process: multicellular organismal process (GO:0032501);; biological process: developmental process (GO:0032502);; biological process: response to stimulus (GO:0050896);; biological process: localization (GO:0051179);; mo…
ENSG00000183889	AC138969.1	6.58	378	5.08741	300	10.0878	369	5.61538	189	6.17275	373	3.76747	251	0.0473055	-0.6226	down	--	--	Molecular Function: protein binding (GO:0005515);; Cellular Component: nuclear pore (GO:0005643);; Biological Process: protein transport (GO:0015031);; Cellular Component: integral component of membrane (GO:0016021);; Cellular Component: nuclear membrane (GO:0031965);; Biological Process: mRNA transport (GO:0051028);;	--	--	--	--	Nuclear pore complex interacting protein (NPIP)	Nuclear pore complex-interacting protein family member A5 OS=Homo sapiens OX=9606 GN=NPIPA5 PE=2 SV=1	Z	Cytoskeleton	LOC339047 protein [Homo sapiens]	molecular function: binding (GO:0005488);; biological process: localization (GO:0051179);; cellular component: macromolecular complex (GO:0032991);; cellular component: membrane part (GO:0044425);; cellular component: organelle (GO:0043226);; cellular component: membrane (GO:0016020);; cellular component: cell part (GO:0044464);; cellular component: organelle part (GO:0044422);; cellular componen…
ENSG00000167552	TUBA1A	36.4453	2570	36.9073	2664	119.734	7949	47.7255	3429	116.439	6938	49.6886	4013	0.0152324	-0.815262	down	--	--	--	K07374|0|dpe:Dper_GL12416|K07374 tubulin alpha | (RefSeq) GL12416 gene product from transcript GL12416-RA	Phagosome (ko04145)	[Z]	Cytoskeleton	Tubulin/FtsZ family, GTPase domain;; Tubulin C-terminal domain	Tubulin alpha-1A chain OS=Homo sapiens OX=9606 GN=TUBA1A PE=1 SV=1	Z	Cytoskeleton	PREDICTED: tubulin alpha-1C chain isoform X2 [Pan paniscus]	--
Human_newGene_9838	--	0.857227	40	0.237554	21	1.36777	65	0.332941	13	1.21283	80	0.456956	32	0.00281023	-1.50957	down	--	--	Molecular Function: actin binding (GO:0003779);; Cellular Component: endoplasmic reticulum-Golgi intermediate compartment (GO:0005793);; Cellular Component: Golgi apparatus (GO:0005794);; Cellular Component: cytoplasmic vesicle membrane (GO:0030659);;	K20479|1.37773e-39|mcc:693446|K20479 WASP homolog-associated protein with actin, membranes and microtubules | (RefSeq) WHAMM; WAS protein homolog associated with actin, golgi membranes and microtubules	--	--	--	--	WASP homolog-associated protein with actin, membranes and microtubules OS=Homo sapiens OX=9606 GN=WHAMM PE=1 SV=2	Z	Cytoskeleton	LOW QUALITY PROTEIN: WASP homolog-associated protein with actin, membranes and microtubules [Pongo abelii]	cellular component: organelle part (GO:0044422);; cellular component: cell (GO:0005623);; cellular component: cell part (GO:0044464);; cellular component: membrane (GO:0016020);; cellular component: organelle (GO:0043226);; molecular function: binding (GO:0005488);;
ENSG00000116852	KIF21B	0.243766	89	0.448146	94	0.664552	228	0.342674	117	1.29303	383	0.3889	110	0.0171824	-1.10149	down	[R]	General function prediction only	Molecular Function: microtubule motor activity (GO:0003777);; Molecular Function: ATP binding (GO:0005524);; Cellular Component: cytoplasm (GO:0005737);; Cellular Component: kinesin complex (GO:0005871);; Cellular Component: microtubule (GO:0005874);; Biological Process: microtubule-based movement (GO:0007018);; Molecular Function: microtubule binding (GO:0008017);; Molecular Function: ATPase act…	K10395|0|hsa:23046|K10395 kinesin family member 4/21/27 | (RefSeq) KIF21B; kinesin family member 21B	--	[Z]	Cytoskeleton	Kinesin motor domain;; WD domain, G-beta repeat;; Microtubule binding;; Nucleoporin Nup120/160	Kinesin-like protein KIF21B OS=Homo sapiens OX=9606 GN=KIF21B PE=1 SV=2	Z	Cytoskeleton	kinesin-like protein KIF21B isoform 2 [Homo sapiens]	biological process: cellular process (GO:0009987);; biological process: single-organism process (GO:0044699);; molecular function: catalytic activity (GO:0003824);; molecular function: binding (GO:0005488);; cellular component: supramolecular complex (GO:0099080);; cellular component: cell (GO:0005623);; cellular component: organelle part (GO:0044422);; cellular component: macromolecular complex …
ENSG00000061337	LZTS1	0.097117	22	0.193381	41	0.846411	167	0.172332	39	0.922994	210	0.219603	57	0.0138445	-1.5454	down	--	--	Molecular Function: DNA binding (GO:0003677);; Molecular Function: transcription factor activity, sequence-specific DNA binding (GO:0003700);; Cellular Component: cytoplasm (GO:0005737);; Biological Process: regulation of transcription, DNA-templated (GO:0006355);; Molecular Function: microtubule binding (GO:0008017);; Cellular Component: postsynaptic density of dendrite (GO:0014069);; Biological…	--	--	--	--	Fez1	Leucine zipper putative tumor suppressor 1 OS=Homo sapiens OX=9606 GN=LZTS1 PE=1 SV=3	Z	Cytoskeleton	leucine zipper putative tumor suppressor 1 [Homo sapiens]	molecular function: nucleic acid binding transcription factor activity (GO:0001071);; molecular function: binding (GO:0005488);; biological process: multicellular organismal process (GO:0032501);; biological process: developmental process (GO:0032502);; biological process: single-organism process (GO:0044699);; biological process: biological regulation (GO:0065007);; biological process: cellular …
ENSG00000130035	GALNT8	0.856194	194	0.859521	20	2.53675	251	0.73941	25	1.58443	373	0.459773	23	3.78922e-16	-3.57493	down	[T]	Signal transduction mechanisms	Molecular Function: delayed rectifier potassium channel activity (GO:0005251);; Cellular Component: voltage-gated potassium channel complex (GO:0008076);; Cellular Component: axon (GO:0030424);; Biological Process: regulation of ion transmembrane transport (GO:0034765);; Cellular Component: axon terminus (GO:0043679);; Biological Process: protein homooligomerization (GO:0051260);; Biological Proc…	K04879|0|hsa:3742|K04879 potassium voltage-gated channel Shaker-related subfamily A member 6 | (RefSeq) KCNA6, HBK2, KV1.6, PPP1R96; potassium voltage-gated channel subfamily A member 6	--	[P]	Inorganic ion transport and metabolism	Ion transport protein;; BTB/POZ domain;; Ion channel	Potassium voltage-gated channel subfamily A member 6 OS=Homo sapiens OX=9606 GN=KCNA6 PE=2 SV=1	P	Inorganic ion transport and metabolism	potassium voltage-gated channel, shaker-related subfamily, member 6, partial [Homo sapiens]	biological process: biological regulation (GO:0065007);; biological process: cellular process (GO:0009987);; biological process: localization (GO:0051179);; biological process: single-organism process (GO:0044699);; biological process: cellular component organization or biogenesis (GO:0071840);; molecular function: transporter activity (GO:0005215);; cellular component: synapse part (GO:0044456);…
ENSG00000058668	ATP2B4	4.59375	1466	2.60237	772	9.06977	2535	6.93435	2349	11.083	3824	3.68534	1336	0.0416845	-0.780306	down	[P]	Inorganic ion transport and metabolism	Biological Process: neural retina development (GO:0003407);; Molecular Function: calcium-transporting ATPase activity (GO:0005388);; Molecular Function: calmodulin binding (GO:0005516);; Molecular Function: ATP binding (GO:0005524);; Cellular Component: integral component of plasma membrane (GO:0005887);; Cellular Component: caveola (GO:0005901);; Biological Process: regulation of transcription f…	K05850|0|pps:100988724|K05850 Ca2+ transporting ATPase, plasma membrane [EC:3.6.3.8] | (RefSeq) ATP2B4; ATPase plasma membrane Ca2+ transporting 4	Calcium signaling pathway (ko04020);; cGMP-PKG signaling pathway (ko04022);; cAMP signaling pathway (ko04024);; Adrenergic signaling in cardiomyocytes (ko04261);; Salivary secretion (ko04970);; Pancreatic secretion (ko04972)	[P]	Inorganic ion transport and metabolism	Cation transporting ATPase, C-terminus;; E1-E2 ATPase;; Plasma membrane calcium transporter ATPase C terminal;; Cation transport ATPase (P-type);; Cation transporter/ATPase, N-terminus;; haloacid dehalogenase-like hydrolase;; haloacid dehalogenase-like hydrolase	Plasma membrane calcium-transporting ATPase 4 OS=Homo sapiens OX=9606 GN=ATP2B4 PE=1 SV=2	P	Inorganic ion transport and metabolism	plasma membrane calcium-transporting ATPase 4 isoform 4b [Homo sapiens]	cellular component: cell part (GO:0044464);; cellular component: membrane (GO:0016020);; cellular component: organelle (GO:0043226);; cellular component: membrane part (GO:0044425);; cellular component: organelle part (GO:0044422);; cellular component: supramolecular complex (GO:0099080);; cellular component: cell (GO:0005623);; cellular component: macromolecular complex (GO:0032991);; biological…
ENSG00000197622	CDC42SE1	20.8953	2415	8.08302	954	15.0998	1635	11.1669	1326	17.4435	2130	5.50556	764	0.000265724	-1.01222	down	--	--	Molecular Function: GTPase inhibitor activity (GO:0005095);; Molecular Function: structural molecule activity (GO:0005198);; Molecular Function: protein binding (GO:0005515);; Cellular Component: cytoplasm (GO:0005737);; Cellular Component: cytoskeleton (GO:0005856);; Cellular Component: plasma membrane (GO:0005886);; Biological Process: phagocytosis (GO:0006909);; Biological Process: regulation …	--	--	--	--	--	CDC42 small effector protein 1 OS=Homo sapiens OX=9606 GN=CDC42SE1 PE=1 SV=1	U	Intracellular trafficking, secretion, and vesicular transport	CDC42 small effector protein 1 [Homo sapiens]	cellular component: extracellular region part (GO:0044421);; cellular component: cell (GO:0005623);; cellular component: extracellular region (GO:0005576);; cellular component: organelle (GO:0043226);; cellular component: membrane (GO:0016020);; cellular component: cell part (GO:0044464);; molecular function: binding (GO:0005488);; molecular function: structural molecule activity (GO:0005198);; m…
ENSG00000177427	MIEF2	1.02853	96	0.891744	91	2.72958	146	0.852625	68	4.16279	225	0.818724	84	0.0247588	-0.937133	down	--	--	Molecular Function: protein binding (GO:0005515);; Cellular Component: mitochondrial outer membrane (GO:0005741);; Cellular Component: peroxisome (GO:0005777);; Biological Process: mitochondrial fusion (GO:0008053);; Cellular Component: integral component of membrane (GO:0016021);; Biological Process: positive regulation of protein homooligomerization (GO:0032464);; Biological Process: positive r…	--	--	--	--	Mab-21 protein	Mitochondrial dynamics protein MID49 OS=Homo sapiens OX=9606 GN=MIEF2 PE=1 SV=1	U	Intracellular trafficking, secretion, and vesicular transport	mitochondrial dynamics protein MID49 isoform X1 [Papio anubis]	molecular function: binding (GO:0005488);; biological process: single-organism process (GO:0044699);; biological process: cellular component organization or biogenesis (GO:0071840);; biological process: biological regulation (GO:0065007);; biological process: cellular process (GO:0009987);; cellular component: organelle (GO:0043226);; cellular component: cell part (GO:0044464);; cellular componen…
ENSG00000169184	MN1	0.339053	97	0.320408	93	0.992211	266	0.330854	98	1.39121	420	0.448528	152	0.010407	-1.18959	down	--	--	--	--	--	--	--	--	Transcriptional activator MN1 OS=Homo sapiens OX=9606 GN=MN1 PE=1 SV=3	U	Intracellular trafficking, secretion, and vesicular transport	transcriptional activator MN1 [Homo sapiens]	--
ENSG00000166225	FRS2	0.522206	90	1.24629	76	1.51404	86	1.27923	60	2.11079	352	0.947663	63	0.00934827	-1.34703	down	--	--	Biological Process: activation of MAPKK activity (GO:0000186);; Biological Process: activation of MAPK activity (GO:0000187);; Biological Process: gastrulation with mouth forming second (GO:0001702);; Biological Process: organ induction (GO:0001759);; Biological Process: ventricular septum development (GO:0003281);; Molecular Function: transmembrane receptor protein tyrosine kinase adaptor activi…	K12461|0|hsa:10818|K12461 fibroblast growth factor receptor substrate 2 | (RefSeq) FRS2, FRS1A, FRS2A, FRS2alpha, SNT, SNT-1, SNT1; fibroblast growth factor receptor substrate 2	Neurotrophin signaling pathway (ko04722);; Proteoglycans in cancer (ko05205)	[T]	Signal transduction mechanisms	PTB domain (IRS-1 type)	Fibroblast growth factor receptor substrate 2 OS=Homo sapiens OX=9606 GN=FRS2 PE=1 SV=4	U	Intracellular trafficking, secretion, and vesicular transport	fibroblast growth factor receptor substrate 2 [Homo sapiens]	cellular component: cell junction (GO:0030054);; cellular component: cell (GO:0005623);; cellular component: membrane part (GO:0044425);; cellular component: membrane (GO:0016020);; cellular component: organelle (GO:0043226);; cellular component: cell part (GO:0044464);; molecular function: signal transducer activity (GO:0004871);; molecular function: molecular function regulator (GO:0098772);; m…
ENSG00000135245	HILPDA	0.739433	37	0.76838	41	3.18173	137	1.32491	52	10.9443	398	1.57647	96	0.0138548	-1.56415	down	--	--	--	--	--	--	--	Hypoxia-inducible lipid droplet-associated	Hypoxia-inducible lipid droplet-associated protein OS=Homo sapiens OX=9606 GN=HILPDA PE=1 SV=1	U	Intracellular trafficking, secretion, and vesicular transport	hypoxia-inducible protein 2, isoform CRA_b, partial [Homo sapiens]	--
ENSG00000109220	CHIC2	4.56793	198	4.66013	206	4.83816	205	1.89509	72	5.92612	283	2.24224	109	0.0479999	-0.831245	down	--	--	--	--	--	[R]	General function prediction only	Golgin subfamily A member 7/ERF4 family	Cysteine-rich hydrophobic domain-containing protein 2 OS=Homo sapiens OX=9606 GN=CHIC2 PE=1 SV=1	U	Intracellular trafficking, secretion, and vesicular transport	cysteine-rich hydrophobic domain-containing protein 2 [Homo sapiens]	--
ENSG00000121361	KCNJ8	0.54843	50	0.808109	74	1.21128	103	0.346321	33	2.41013	230	0.574396	62	0.0315468	-1.15711	down	[S]	Function unknown	Biological Process: kidney development (GO:0001822);; Biological Process: response to ischemia (GO:0002931);; Molecular Function: ATP binding (GO:0005524);; Cellular Component: nuclear envelope (GO:0005635);; Cellular Component: mitochondrion (GO:0005739);; Cellular Component: endosome (GO:0005768);; Cellular Component: endoplasmic reticulum (GO:0005783);; Cellular Component: cytosol (GO:0005829)…	K05001|0|rro:104660757|K05001 potassium inwardly-rectifying channel subfamily J member 8 | (RefSeq) KCNJ8; potassium voltage-gated channel subfamily J member 8	cGMP-PKG signaling pathway (ko04022)	[P]	Inorganic ion transport and metabolism	Inward rectifier potassium channel	ATP-sensitive inward rectifier potassium channel 8 OS=Homo sapiens OX=9606 GN=KCNJ8 PE=1 SV=1	U	Intracellular trafficking, secretion, and vesicular transport	ATP-sensitive inward rectifier potassium channel 8 [Homo sapiens]	biological process: biological regulation (GO:0065007);; biological process: multi-organism process (GO:0051704);; biological process: response to stimulus (GO:0050896);; biological process: localization (GO:0051179);; biological process: cellular process (GO:0009987);; biological process: metabolic process (GO:0008152);; biological process: immune system process (GO:0002376);; biological process…
ENSG00000113384	GOLPH3	6.54893	675	6.92879	723	8.47834	815	5.0736	535	13.5606	1429	5.41671	655	0.033099	-0.599504	down	--	--	--	K15620|9.07153e-173|rro:104673855|K15620 golgi phosphoprotein 3 | (RefSeq) GOLPH3; golgi phosphoprotein 3	Transcriptional misregulation in cancer (ko05202)	[U]	Intracellular trafficking, secretion, and vesicular transport	Golgi phosphoprotein 3 (GPP34)	Golgi phosphoprotein 3 OS=Homo sapiens OX=9606 GN=GOLPH3 PE=1 SV=1	U	Intracellular trafficking, secretion, and vesicular transport	Golgi phosphoprotein 3 [Homo sapiens]	--
ENSG00000171227	TMEM37	1.20919	73	1.00818	66	1.79615	108	0.990451	65	2.55958	173	0.765794	58	0.0428196	-0.888769	down	--	--	--	--	--	--	--	Voltage-dependent calcium channel gamma-like subunit protein family	Voltage-dependent calcium channel gamma-like subunit OS=Homo sapiens OX=9606 GN=TMEM37 PE=2 SV=2	U	Intracellular trafficking, secretion, and vesicular transport	voltage-dependent calcium channel gamma-like subunit [Homo sapiens]	--
ENSG00000158470	B4GALT5	5.92566	1059	7.33829	1328	11.5069	1928	5.75098	1056	17.6037	3314	5.93457	1254	0.0118531	-0.777365	down	[G]	Carbohydrate transport and metabolism	Molecular Function: beta-N-acetylglucosaminylglycopeptide beta-1,4-galactosyltransferase activity (GO:0003831);; Biological Process: carbohydrate metabolic process (GO:0005975);; Cellular Component: integral component of membrane (GO:0016021);; Biological Process: O-glycan processing (GO:0016266);; Biological Process: keratan sulfate biosynthetic process (GO:0018146);; Cellular Component: Golgi c…	K09905|0|nle:100592572|K09905 beta-1,4-galactosyltransferase 5 [EC:2.4.1.-] | (RefSeq) B4GALT5; beta-1,4-galactosyltransferase 5	Mucin type O-Glycan biosynthesis (ko00512)	[G]	Carbohydrate transport and metabolism	N-terminal region of glycosyl transferase group 7;; N-terminal domain of galactosyltransferase	Beta-1,4-galactosyltransferase 5 OS=Homo sapiens OX=9606 GN=B4GALT5 PE=2 SV=1	U	Intracellular trafficking, secretion, and vesicular transport	PREDICTED: beta-1,4-galactosyltransferase 5 [Macaca nemestrina]	cellular component: extracellular region part (GO:0044421);; cellular component: cell (GO:0005623);; cellular component: organelle part (GO:0044422);; cellular component: extracellular region (GO:0005576);; cellular component: membrane (GO:0016020);; cellular component: cell part (GO:0044464);; cellular component: organelle (GO:0043226);; cellular component: membrane part (GO:0044425);; biologica…
ENSG00000213402	PTPRCAP	1.75755	86	0.584313	29	1.73711	80	0.490212	25	1.48554	77	0	0	0.00406228	-2.1372	down	--	--	Cellular Component: plasma membrane (GO:0005886);; Biological Process: defense response (GO:0006952);; Cellular Component: integral component of membrane (GO:0016021);;	--	--	--	--	Protein tyrosine phosphatase receptor type C-associated	Protein tyrosine phosphatase receptor type C-associated protein OS=Homo sapiens OX=9606 GN=PTPRCAP PE=1 SV=1	U	Intracellular trafficking, secretion, and vesicular transport	PREDICTED: protein tyrosine phosphatase receptor type C-associated protein [Pan troglodytes]	biological process: response to stimulus (GO:0050896);; cellular component: membrane (GO:0016020);; cellular component: cell part (GO:0044464);; cellular component: membrane part (GO:0044425);; cellular component: cell (GO:0005623);;
ENSG00000118804	STBD1	1.46602	190	1.28322	169	2.28012	277	1.12415	150	3.27803	447	1.51358	232	0.0434275	-0.733012	down	--	--	--	--	--	--	--	Starch binding domain	Starch-binding domain-containing protein 1 OS=Homo sapiens OX=9606 GN=STBD1 PE=1 SV=1	U	Intracellular trafficking, secretion, and vesicular transport	starch-binding domain-containing protein 1 [Homo sapiens]	--
ENSG00000166272	WBP1L	1.36174	176	2.00494	267	3.14064	344	1.12317	141	4.36245	593	1.59543	222	0.0466396	-0.811455	down	--	--	Molecular Function: protein binding (GO:0005515);; Cellular Component: integral component of membrane (GO:0016021);;	--	--	--	--	WW domain-binding protein 1	WW domain binding protein 1-like OS=Homo sapiens OX=9606 GN=WBP1L PE=1 SV=2	U	Intracellular trafficking, secretion, and vesicular transport	WW domain binding protein 1-like isoform 2 [Homo sapiens]	cellular component: membrane (GO:0016020);; cellular component: membrane part (GO:0044425);; molecular function: binding (GO:0005488);;
ENSG00000065308	TRAM2	2.93639	768	2.79819	741	3.17112	777	1.79663	483	5.14919	1418	2.25443	697	0.0247491	-0.620362	down	--	--	Molecular Function: protein binding (GO:0005515);; Cellular Component: rough endoplasmic reticulum (GO:0005791);; Biological Process: cotranslational protein targeting to membrane (GO:0006613);; Cellular Component: integral component of membrane (GO:0016021);; Biological Process: collagen biosynthetic process (GO:0032964);;	--	--	[U]	Intracellular trafficking, secretion, and vesicular transport	TLC domain;; TRAM1-like protein	Translocating chain-associated membrane protein 2 OS=Homo sapiens OX=9606 GN=TRAM2 PE=1 SV=1	U	Intracellular trafficking, secretion, and vesicular transport	translocating chain-associated membrane protein 2 [Homo sapiens]	cellular component: membrane part (GO:0044425);; cellular component: cell part (GO:0044464);; cellular component: membrane (GO:0016020);; cellular component: organelle (GO:0043226);; cellular component: cell (GO:0005623);; biological process: localization (GO:0051179);; biological process: multicellular organismal process (GO:0032501);; biological process: single-organism process (GO:0044699);; b…
ENSG00000166734	CASC4	15.7744	2276	11.7694	1698	16.9777	2304	11.4191	1641	18.5766	2833	6.82062	1098	0.00332553	-0.733579	down	--	--	Cellular Component: Golgi apparatus (GO:0005794);; Cellular Component: integral component of membrane (GO:0016021);;	--	--	--	--	--	Protein CASC4 OS=Homo sapiens OX=9606 GN=CASC4 PE=1 SV=1	U	Intracellular trafficking, secretion, and vesicular transport	protein CASC4 isoform a [Homo sapiens]	cellular component: cell (GO:0005623);; cellular component: membrane (GO:0016020);; cellular component: organelle (GO:0043226);; cellular component: cell part (GO:0044464);; cellular component: membrane part (GO:0044425);;
ENSG00000125629	INSIG2	0.754687	67	0.859105	77	2.07115	171	0.959994	80	4.39152	410	1.24286	121	0.0223331	-1.19279	down	--	--	--	--	--	[T]	Signal transduction mechanisms	Insulin-induced protein (INSIG)	Insulin-induced gene 2 protein OS=Homo sapiens OX=9606 GN=INSIG2 PE=1 SV=2	U	Intracellular trafficking, secretion, and vesicular transport	insulin-induced gene 2 protein isoform a [Homo sapiens]	--
ENSG00000162426	SLC45A1	0.330648	35	0.133979	15	0.396551	40	0.089238	10	0.400275	45	0.23556	30	0.0272014	-1.16227	down	[G]	Carbohydrate transport and metabolism	Molecular Function: glucose transmembrane transporter activity (GO:0005355);; Molecular Function: symporter activity (GO:0015293);; Cellular Component: integral component of membrane (GO:0016021);; Biological Process: glucose transmembrane transport (GO:1904659);;	K15378|0|hsa:50651|K15378 solute carrier family 45, member 1/2/4 | (RefSeq) SLC45A1, DNB5; solute carrier family 45 member 1	--	[G]	Carbohydrate transport and metabolism	Major Facilitator Superfamily;; MFS/sugar transport protein	Proton-associated sugar transporter A OS=Homo sapiens OX=9606 GN=SLC45A1 PE=1 SV=5	U	Intracellular trafficking, secretion, and vesicular transport	PREDICTED: proton-associated sugar transporter A isoform X1 [Chlorocebus sabaeus]	biological process: localization (GO:0051179);; biological process: single-organism process (GO:0044699);; molecular function: transporter activity (GO:0005215);; cellular component: membrane (GO:0016020);; cellular component: membrane part (GO:0044425);;
ENSG00000100100	PIK3IP1	1.78901	153	1.75141	164	4.10377	353	2.31262	222	7.06282	637	2.27646	248	0.0493175	-0.830858	down	--	--	--	--	--	--	--	Kringle domain	Phosphoinositide-3-kinase-interacting protein 1 OS=Homo sapiens OX=9606 GN=PIK3IP1 PE=1 SV=2	U	Intracellular trafficking, secretion, and vesicular transport	phosphoinositide-3-kinase-interacting protein 1 isoform 1 precursor [Homo sapiens]	--
ENSG00000037749	MFAP3	6.68983	535	3.47646	90	8.9615	618	5.58842	469	9.53963	726	3.48822	111	0.00571086	-1.44493	down	--	--	Cellular Component: extracellular region (GO:0005576);; Cellular Component: plasma membrane (GO:0005886);; Cellular Component: integral component of membrane (GO:0016021);;	--	--	--	--	Immunoglobulin domain;; Immunoglobulin I-set domain	Microfibril-associated glycoprotein 3 OS=Homo sapiens OX=9606 GN=MFAP3 PE=2 SV=1	U	Intracellular trafficking, secretion, and vesicular transport	PREDICTED: microfibril-associated glycoprotein 3 isoform X1 [Gorilla gorilla gorilla]	cellular component: extracellular region (GO:0005576);; cellular component: cell (GO:0005623);; cellular component: cell part (GO:0044464);; cellular component: membrane (GO:0016020);; cellular component: membrane part (GO:0044425);;
ENSG00000110723	EXPH5	0.125431	49	0.053382	21	0.105033	38	0.082949	33	0.388231	127	0.10207	47	0.0467989	-1.05454	down	--	--	--	--	--	--	--	--	Exophilin-5 OS=Homo sapiens OX=9606 GN=EXPH5 PE=1 SV=3	U	Intracellular trafficking, secretion, and vesicular transport	exophilin-5 isoform 1 [Homo sapiens]	--
ENSG00000153395	LPCAT1	5.84466	877	5.95606	907	13.3525	1882	7.27013	1121	16.5823	2622	6.9636	1236	0.0225409	-0.717901	down	[I]	Lipid transport and metabolism	Cellular Component: Golgi membrane (GO:0000139);; Molecular Function: 1-acylglycerol-3-phosphate O-acyltransferase activity (GO:0003841);; Molecular Function: calcium ion binding (GO:0005509);; Cellular Component: endoplasmic reticulum membrane (GO:0005789);; Cellular Component: lipid droplet (GO:0005811);; Biological Process: phosphatidic acid biosynthetic process (GO:0006654);; Cellular Compone…	K13510|0|hsa:79888|K13510 lysophosphatidylcholine acyltransferase / lyso-PAF acetyltransferase [EC:2.3.1.23 2.3.1.67] | (RefSeq) LPCAT1, AGPAT10, AGPAT9, AYTL2, LPCAT-1, PFAAP3, lpcat, lysoPAFAT; lysophosphatidylcholine acyltransferase 1	Glycerophospholipid metabolism (ko00564);; Ether lipid metabolism (ko00565)	[I]	Lipid transport and metabolism	Acyltransferase;; EF-hand domain pair;; EF-hand domain;; EF-hand domain pair;; EF hand	Lysophosphatidylcholine acyltransferase 1 OS=Homo sapiens OX=9606 GN=LPCAT1 PE=1 SV=2	I	Lipid transport and metabolism	lysophosphatidylcholine acyltransferase 1 [Homo sapiens]	molecular function: binding (GO:0005488);; molecular function: catalytic activity (GO:0003824);; biological process: metabolic process (GO:0008152);; biological process: cellular process (GO:0009987);; biological process: biological regulation (GO:0065007);; biological process: developmental process (GO:0032502);; biological process: multicellular organismal process (GO:0032501);; biological proc…
ENSG00000094841	UPRT	2.86596	231	1.23486	73	2.17068	163	1.6614	144	2.8999	255	1.06552	70	0.00669621	-1.15255	down	[F]	Nucleotide transport and metabolism	--	K00761|0|ptr:465722|K00761 uracil phosphoribosyltransferase [EC:2.4.2.9] | (RefSeq) UPRT; uracil phosphoribosyltransferase homolog	Pyrimidine metabolism (ko00240)	[R]	General function prediction only	Uracil phosphoribosyltransferase	Uracil phosphoribosyltransferase homolog OS=Homo sapiens OX=9606 GN=UPRT PE=1 SV=1	F	Nucleotide transport and metabolism	uracil phosphoribosyltransferase homolog isoform 2 [Homo sapiens]	--
ENSG00000197852	INKA2	1.9895	429	2.15396	495	3.56049	757	1.64573	380	4.16378	994	1.78321	463	0.0217547	-0.707155	down	--	--	--	--	--	--	--	FAM212 family	PAK4-inhibitor INKA2 OS=Homo sapiens OX=9606 GN=FAM212B PE=1 SV=1	O	Posttranslational modification, protein turnover, chaperones	PREDICTED: protein FAM212B [Pan troglodytes]	--
ENSG00000119699	TGFB3	2.17686	184	1.8019	166	2.77351	242	1.33196	126	3.58652	355	1.40273	155	0.0235333	-0.804715	down	--	--	--	K13377|0|cfa:490796|K13377 transforming growth factor beta-3 | (RefSeq) TGFB3, TGFbeta3; transforming growth factor beta 3	MAPK signaling pathway (ko04010);; Cytokine-cytokine receptor interaction (ko04060);; FoxO signaling pathway (ko04068);; Cell cycle (ko04110);; Endocytosis (ko04144);; TGF-beta signaling pathway (ko04350);; Hippo signaling pathway (ko04390);; AGE-RAGE signaling pathway in diabetic complications (ko04933);; Leishmaniasis (ko05140);; Chagas disease (American trypanosomiasis) (ko05142);; Malaria (ko…	[T]	Signal transduction mechanisms	TGF-beta propeptide;; Transforming growth factor beta like domain	Transforming growth factor beta-3 OS=Homo sapiens OX=9606 GN=TGFB3 PE=1 SV=1	O	Posttranslational modification, protein turnover, chaperones	transforming growth factor beta-3 isoform 1 preproprotein [Homo sapiens]	--
ENSG00000170677	SOCS6	0.699311	155	0.492228	111	0.869967	181	0.523602	120	1.47346	342	0.603301	158	0.038905	-0.793238	down	--	--	Cellular Component: immunological synapse (GO:0001772);; Molecular Function: protein kinase inhibitor activity (GO:0004860);; Cellular Component: nucleus (GO:0005634);; Cellular Component: cytoplasm (GO:0005737);; Biological Process: negative regulation of protein kinase activity (GO:0006469);; Biological Process: defense response (GO:0006952);; Biological Process: insulin receptor signaling path…	K04699|0|hsa:9306|K04699 suppressor of cytokine signaling 6/7 | (RefSeq) SOCS6, CIS-4, CIS4, HSPC060, SOCS-4, SOCS-6, SOCS4, SSI4, STAI4, STATI4; suppressor of cytokine signaling 6	Jak-STAT signaling pathway (ko04630);; Prolactin signaling pathway (ko04917)	[T]	Signal transduction mechanisms	SH2 domain;; SOCS box	Suppressor of cytokine signaling 6 OS=Homo sapiens OX=9606 GN=SOCS6 PE=1 SV=2	O	Posttranslational modification, protein turnover, chaperones	suppressor of cytokine signaling 6 [Homo sapiens]	cellular component: organelle (GO:0043226);; cellular component: membrane (GO:0016020);; cellular component: cell part (GO:0044464);; cellular component: membrane part (GO:0044425);; cellular component: cell (GO:0005623);; molecular function: molecular function regulator (GO:0098772);; molecular function: binding (GO:0005488);; biological process: single-organism process (GO:0044699);; biological…
ENSG00000183579	ZNRF3	0.581774	131	0.571584	131	0.931592	215	0.258435	69	1.45394	374	0.358595	110	0.00473946	-1.20741	down	--	--	Molecular Function: frizzled binding (GO:0005109);; Cellular Component: integral component of plasma membrane (GO:0005887);; Biological Process: ubiquitin-dependent protein catabolic process (GO:0006511);; Molecular Function: zinc ion binding (GO:0008270);; Biological Process: protein ubiquitination (GO:0016567);; Molecular Function: ligase activity (GO:0016874);; Biological Process: Wnt receptor…	K16273|0|hsa:84133|K16273 E3 ubiquitin-protein ligase ZNRF3 [EC:2.3.2.27] | (RefSeq) ZNRF3, BK747E2.3, RNF203; zinc and ring finger 3	--	--	--	Ring finger domain;; RING-like zinc finger;; Zinc finger, C3HC4 type (RING finger);; Zinc finger, C3HC4 type (RING finger)	E3 ubiquitin-protein ligase ZNRF3 OS=Homo sapiens OX=9606 GN=ZNRF3 PE=1 SV=3	O	Posttranslational modification, protein turnover, chaperones	KIAA1133 protein, partial [Homo sapiens]	biological process: single-organism process (GO:0044699);; biological process: response to stimulus (GO:0050896);; biological process: biological regulation (GO:0065007);; biological process: signaling (GO:0023052);; biological process: cellular process (GO:0009987);; biological process: metabolic process (GO:0008152);; molecular function: catalytic activity (GO:0003824);; molecular function: bin…
ENSG00000129521	EGLN3	0.528295	57	0.522003	57	1.1082	108	0.588121	64	2.34158	257	0.493814	62	0.0211518	-1.16439	down	--	--	Molecular Function: iron ion binding (GO:0005506);; Molecular Function: protein binding (GO:0005515);; Cellular Component: nucleoplasm (GO:0005654);; Cellular Component: cytosol (GO:0005829);; Biological Process: activation of cysteine-type endopeptidase activity involved in apoptotic process (GO:0006919);; Biological Process: cellular response to DNA damage stimulus (GO:0006974);; Biological Pro…	K09592|7.94765e-83|rno:54702|K09592 hypoxia-inducible factor prolyl hydroxylase [EC:1.14.11.29] | (RefSeq) Egln3, PHD-3, PHD3, SM-20; egl-9 family hypoxia-inducible factor 3	HIF-1 signaling pathway (ko04066);; Pathways in cancer (ko05200);; Renal cell carcinoma (ko05211)	[T]	Signal transduction mechanisms	--	Egl nine homolog 3 OS=Homo sapiens OX=9606 GN=EGLN3 PE=1 SV=1	O	Posttranslational modification, protein turnover, chaperones	EGLN3 isoform 5 [Pan troglodytes]	biological process: biological regulation (GO:0065007);; biological process: cellular process (GO:0009987);; biological process: metabolic process (GO:0008152);; biological process: single-organism process (GO:0044699);; biological process: multicellular organismal process (GO:0032501);; biological process: developmental process (GO:0032502);; biological process: response to stimulus (GO:0050896)…
ENSG00000133874	RNF122	0.509276	36	0.253642	19	0.525193	35	0.162579	12	0.882559	66	0.396455	34	0.0382271	-1.08774	down	--	--	Cellular Component: Golgi membrane (GO:0000139);; Biological Process: protein polyubiquitination (GO:0000209);; Molecular Function: protein binding (GO:0005515);; Cellular Component: endoplasmic reticulum (GO:0005783);; Molecular Function: zinc ion binding (GO:0008270);; Cellular Component: integral component of membrane (GO:0016021);; Biological Process: protein ubiquitination involved in ubiqui…	K15699|2.76904e-105|oas:101116204|K15699 RING finger protein 122 | (RefSeq) RNF122; ring finger protein 122	--	[O]	Posttranslational modification, protein turnover, chaperones	Ring finger domain;; RING-like zinc finger;; RING-type zinc-finger;; RING-H2 zinc finger domain;; Zinc finger, C3HC4 type (RING finger);; Zinc finger, C3HC4 type (RING finger)	RING finger protein 122 OS=Homo sapiens OX=9606 GN=RNF122 PE=2 SV=2	O	Posttranslational modification, protein turnover, chaperones	RING finger protein 122 [Homo sapiens]	biological process: cellular process (GO:0009987);; biological process: metabolic process (GO:0008152);; molecular function: binding (GO:0005488);; molecular function: catalytic activity (GO:0003824);; cellular component: membrane part (GO:0044425);; cellular component: cell part (GO:0044464);; cellular component: membrane (GO:0016020);; cellular component: organelle (GO:0043226);; cellular compo…
ENSG00000156735	BAG4	3.00689	251	1.76201	141	2.38572	302	1.28563	185	1.88134	295	1.12064	214	0.0446527	-0.675819	down	--	--	--	K09558|0|pps:100992629|K09558 BCL2-associated athanogene 4 | (RefSeq) BAG4; BCL2 associated athanogene 4	TNF signaling pathway (ko04668)	[T]	Signal transduction mechanisms	BAG domain	BAG family molecular chaperone regulator 4 OS=Homo sapiens OX=9606 GN=BAG4 PE=1 SV=1	O	Posttranslational modification, protein turnover, chaperones	PREDICTED: BAG family molecular chaperone regulator 4 isoform X1 [Pan paniscus]	--
ENSG00000182378	PLCXD1	3.23404	510	2.736	507	3.29026	498	2.62011	314	5.84925	963	2.24294	412	0.0294277	-0.665168	down	--	--	Biological Process: lipid metabolic process (GO:0006629);; Molecular Function: phosphoric diester hydrolase activity (GO:0008081);;	--	--	[T]	Signal transduction mechanisms	Phosphatidylinositol-specific phospholipase C, X domain	PI-PLC X domain-containing protein 1 OS=Homo sapiens OX=9606 GN=PLCXD1 PE=2 SV=1	O	Posttranslational modification, protein turnover, chaperones	PI-PLC X domain-containing protein 1 isoform X1 [Pongo abelii]	molecular function: catalytic activity (GO:0003824);; biological process: metabolic process (GO:0008152);; biological process: single-organism process (GO:0044699);;
ENSG00000135913	USP37	1.69532	418	1.58267	400	2.13585	519	1.19965	363	3.28199	805	1.09037	390	0.0429206	-0.588935	down	--	--	Biological Process: G1/S transition of mitotic cell cycle (GO:0000082);; Molecular Function: cysteine-type endopeptidase activity (GO:0004197);; Molecular Function: thiol-dependent ubiquitin-specific protease activity (GO:0004843);; Cellular Component: nucleus (GO:0005634);; Biological Process: ubiquitin-dependent protein catabolic process (GO:0006511);; Biological Process: mitotic cell cycle (GO…	K11850|0|hsa:57695|K11850 ubiquitin carboxyl-terminal hydrolase 26/29/37 [EC:3.4.19.12] | (RefSeq) USP37; ubiquitin specific peptidase 37	--	[O]	Posttranslational modification, protein turnover, chaperones	Ubiquitin carboxyl-terminal hydrolase;; N-terminal of ubiquitin carboxyl-terminal hydrolase 37;; Ubiquitin carboxyl-terminal hydrolase;; Ubiquitin interaction motif	Ubiquitin carboxyl-terminal hydrolase 37 OS=Homo sapiens OX=9606 GN=USP37 PE=1 SV=2	O	Posttranslational modification, protein turnover, chaperones	PREDICTED: ubiquitin carboxyl-terminal hydrolase 37 isoform X1 [Homo sapiens]	biological process: single-organism process (GO:0044699);; biological process: metabolic process (GO:0008152);; biological process: cellular process (GO:0009987);; molecular function: catalytic activity (GO:0003824);; molecular function: binding (GO:0005488);; cellular component: organelle (GO:0043226);; cellular component: cell part (GO:0044464);; cellular component: cell (GO:0005623);;
ENSG00000132669	RIN2	1.97819	338	1.95976	339	2.516	403	1.25899	221	3.76391	677	1.48778	300	0.0262081	-0.71675	down	--	--	Molecular Function: GTPase activator activity (GO:0005096);; Cellular Component: cytoplasm (GO:0005737);; Biological Process: endocytosis (GO:0006897);; Biological Process: small GTPase mediated signal transduction (GO:0007264);; Molecular Function: Rab guanyl-nucleotide exchange factor activity (GO:0017112);; Biological Process: positive regulation of GTPase activity (GO:0043547);;	--	--	[U]	Intracellular trafficking, secretion, and vesicular transport	Vacuolar sorting protein 9 (VPS9) domain;; Ras association (RalGDS/AF-6) domain	Ras and Rab interactor 2 OS=Homo sapiens OX=9606 GN=RIN2 PE=1 SV=1	O	Posttranslational modification, protein turnover, chaperones	ras and Rab interactor 2 isoform 1 [Homo sapiens]	molecular function: molecular function regulator (GO:0098772);; biological process: signaling (GO:0023052);; biological process: biological regulation (GO:0065007);; biological process: cellular process (GO:0009987);; biological process: single-organism process (GO:0044699);; biological process: response to stimulus (GO:0050896);; biological process: localization (GO:0051179);; cellular component…
ENSG00000183691	NOG	1.74055	125	2.12068	154	9.83429	660	3.74802	276	18.2943	1380	4.26553	362	0.0119767	-1.42397	down	--	--	Biological Process: negative regulation of transcription from RNA polymerase II promoter (GO:0000122);; Biological Process: in utero embryonic development (GO:0001701);; Biological Process: endoderm formation (GO:0001706);; Biological Process: mesoderm formation (GO:0001707);; Biological Process: epithelial to mesenchymal transition (GO:0001837);; Biological Process: neural plate morphogenesis (G…	K04658|9.89904e-128|bacu:103016038|K04658 noggin | (RefSeq) NOG; noggin	TGF-beta signaling pathway (ko04350)	--	--	Noggin	Noggin OS=Homo sapiens OX=9606 GN=NOG PE=1 SV=1	O	Posttranslational modification, protein turnover, chaperones	PREDICTED: noggin [Pan troglodytes]	cellular component: extracellular region (GO:0005576);; cellular component: extracellular region part (GO:0044421);; biological process: cellular component organization or biogenesis (GO:0071840);; biological process: multicellular organismal process (GO:0032501);; biological process: single-organism process (GO:0044699);; biological process: developmental process (GO:0032502);; biological proces…
ENSG00000258311	AC009779.3	3.12977	360	0.904008	116	4.26567	470	2.02125	257	4.59359	587	2.99549	426	0.0313161	-0.856586	down	[C]	Energy production and conversion	--	K00061|8.20632e-44|myb:102250054|K00061 11-cis-retinol dehydrogenase [EC:1.1.1.315] | (RefSeq) RDH5; retinol dehydrogenase 5	Retinol metabolism (ko00830)	[QR]	Secondary metabolites biosynthesis, transport and catabolism;; General function prediction only	GCN5-like protein 1 (GCN5L1);; short chain dehydrogenase	Biogenesis of lysosome-related organelles complex 1 subunit 1 OS=Homo sapiens OX=9606 GN=BLOC1S1 PE=1 SV=2	O	Posttranslational modification, protein turnover, chaperones	PREDICTED: 11-cis retinol dehydrogenase [Cercocebus atys]	--
ENSG00000070404	FSTL3	73.8928	7026	71.4711	6830	87.4264	7679	33.834	3250	73.172	7350	30.9858	3418	0.0103284	-0.725455	down	--	--	Biological Process: ossification (GO:0001503);; Biological Process: kidney development (GO:0001822);; Molecular Function: fibronectin binding (GO:0001968);; Biological Process: hematopoietic progenitor cell differentiation (GO:0002244);; Cellular Component: extracellular space (GO:0005615);; Cellular Component: nucleoplasm (GO:0005654);; Cellular Component: Golgi apparatus (GO:0005794);; Biologic…	--	--	[R]	General function prediction only	Kazal-type serine protease inhibitor domain;; Kazal-type serine protease inhibitor domain;; Follistatin/Osteonectin-like EGF domain;; WG containing repeat	Follistatin-related protein 3 OS=Homo sapiens OX=9606 GN=FSTL3 PE=1 SV=1	O	Posttranslational modification, protein turnover, chaperones	PREDICTED: follistatin-related protein 3 isoform X2 [Gorilla gorilla gorilla]	cellular component: organelle part (GO:0044422);; cellular component: extracellular region part (GO:0044421);; cellular component: cell (GO:0005623);; cellular component: extracellular region (GO:0005576);; cellular component: cell part (GO:0044464);; cellular component: organelle (GO:0043226);; molecular function: binding (GO:0005488);; biological process: reproduction (GO:0000003);; biological …
ENSG00000175931	UBE2O	3.02416	438	2.8394	545	4.68379	859	2.62959	533	8.86064	1804	2.69104	568	0.0166098	-0.882536	down	--	--	Molecular Function: ATP binding (GO:0005524);; Cellular Component: nucleus (GO:0005634);; Cellular Component: cytosol (GO:0005829);; Biological Process: protein monoubiquitination (GO:0006513);; Biological Process: positive regulation of BMP signaling pathway (GO:0030513);; Molecular Function: ubiquitin protein ligase binding (GO:0031625);; Biological Process: retrograde transport, endosome to Go…	K10581|0|hsa:63893|K10581 ubiquitin-conjugating enzyme E2 O [EC:2.3.2.24] | (RefSeq) UBE2O, E2-230K; ubiquitin conjugating enzyme E2 O	Ubiquitin mediated proteolysis (ko04120)	[O]	Posttranslational modification, protein turnover, chaperones	Ubiquitin-conjugating enzyme	(E3-independent) E2 ubiquitin-conjugating enzyme OS=Homo sapiens OX=9606 GN=UBE2O PE=1 SV=3	O	Posttranslational modification, protein turnover, chaperones	(E3-independent) E2 ubiquitin-conjugating enzyme [Homo sapiens]	molecular function: catalytic activity (GO:0003824);; molecular function: binding (GO:0005488);; biological process: cellular process (GO:0009987);; biological process: metabolic process (GO:0008152);; biological process: biological regulation (GO:0065007);; biological process: localization (GO:0051179);; cellular component: organelle (GO:0043226);; cellular component: cell part (GO:0044464);; ce…
ENSG00000180611	MB21D2	0.726694	93	0.603015	78	0.997603	120	0.351516	47	1.99016	268	0.571617	87	0.0105536	-1.16852	down	--	--	Molecular Function: protein complex binding (GO:0032403);;	--	--	[T]	Signal transduction mechanisms	Mab-21 protein	Protein MB21D2 OS=Homo sapiens OX=9606 GN=MB21D2 PE=1 SV=3	O	Posttranslational modification, protein turnover, chaperones	protein MB21D2 [Homo sapiens]	molecular function: binding (GO:0005488);;
ENSG00000185567	AHNAK2	4.48791	3095	5.21025	732	4.54228	598	2.9492	407	5.30867	810	3.20772	527	0.00268468	-1.46626	down	--	--	Biological Process: plasma membrane repair (GO:0001778);; Molecular Function: protein binding (GO:0005515);; Cellular Component: nucleus (GO:0005634);; Cellular Component: Z disc (GO:0030018);; Cellular Component: T-tubule (GO:0030315);; Cellular Component: cytoplasmic vesicle membrane (GO:0030659);; Cellular Component: costamere (GO:0043034);;	--	--	--	--	Domain of unknown function (DUF4882);; AsmA-like C-terminal region	Protein AHNAK2 OS=Homo sapiens OX=9606 GN=AHNAK2 PE=1 SV=2	O	Posttranslational modification, protein turnover, chaperones	protein AHNAK2 isoform 1 [Homo sapiens]	molecular function: binding (GO:0005488);; biological process: single-organism process (GO:0044699);; biological process: cellular component organization or biogenesis (GO:0071840);; biological process: cellular process (GO:0009987);; cellular component: cell part (GO:0044464);; cellular component: membrane (GO:0016020);; cellular component: organelle (GO:0043226);; cellular component: membrane p…
ENSG00000189057	FAM111B	6.05831	788	4.49635	599	8.27497	1007	2.20081	286	10.6039	1440	3.34279	523	6.51749e-05	-1.21117	down	--	--	Molecular Function: protein binding (GO:0005515);;	--	--	--	--	Trypsin-like peptidase domain;; Protein of unknown function (DUF1725)	Protein FAM111B OS=Homo sapiens OX=9606 GN=FAM111B PE=1 SV=1	O	Posttranslational modification, protein turnover, chaperones	protein FAM111B isoform a [Homo sapiens]	molecular function: binding (GO:0005488);;
ENSG00000101236	RNF24	0.695999	188	1.13739	171	1.47008	335	0.746219	148	2.45742	520	0.656117	215	0.00987804	-0.965802	down	--	--	--	--	--	[O]	Posttranslational modification, protein turnover, chaperones	Ring finger domain;; RING-like zinc finger;; RING-H2 zinc finger domain;; Zinc finger, C3HC4 type (RING finger);; Zinc finger, C3HC4 type (RING finger);; Anaphase-promoting complex subunit 11 RING-H2 finger	RING finger protein 24 OS=Homo sapiens OX=9606 GN=RNF24 PE=1 SV=1	O	Posttranslational modification, protein turnover, chaperones	PREDICTED: RING finger protein 24 isoform X1 [Macaca fascicularis]	--
ENSG00000182263	FIGN	0.337762	83	0.273673	101	0.412203	140	0.199574	75	0.997007	323	0.205826	88	0.0296342	-1.01529	down	[MDT]	Cell wall/membrane/envelope biogenesis;; Cell cycle control, cell division, chromosome partitioning;; Signal transduction mechanisms	Molecular Function: ATP binding (GO:0005524);; Cellular Component: cytoplasm (GO:0005737);; Cellular Component: microtubule organizing center (GO:0005815);; Cellular Component: microtubule (GO:0005874);; Biological Process: mitotic cell cycle (GO:0007067);; Molecular Function: protein C-terminus binding (GO:0008022);; Molecular Function: microtubule-severing ATPase activity (GO:0008568);; Biologi…	--	--	[O]	Posttranslational modification, protein turnover, chaperones	ATPase family associated with various cellular activities (AAA);; Vps4 C terminal oligomerisation domain;; AAA domain (dynein-related subfamily)	Fidgetin OS=Homo sapiens OX=9606 GN=FIGN PE=1 SV=2	O	Posttranslational modification, protein turnover, chaperones	fidgetin isoform 1 [Homo sapiens]	cellular component: supramolecular complex (GO:0099080);; cellular component: organelle part (GO:0044422);; cellular component: cell (GO:0005623);; cellular component: cell part (GO:0044464);; cellular component: organelle (GO:0043226);; biological process: cellular component organization or biogenesis (GO:0071840);; biological process: single-organism process (GO:0044699);; biological process: c…
ENSG00000182175	RGMA	0.794518	122	1.01338	132	2.90262	341	0.481691	164	3.93479	542	0.853483	154	0.0104058	-1.13859	down	--	--	Biological Process: neural tube closure (GO:0001843);; Molecular Function: protein binding (GO:0001948);; Cellular Component: endoplasmic reticulum (GO:0005783);; Cellular Component: plasma membrane (GO:0005886);; Cellular Component: cell surface (GO:0009986);; Biological Process: positive regulation of neuron projection development (GO:0010976);; Molecular Function: coreceptor activity (GO:00150…	K06847|0|hsa:56963|K06847 RGM domain family | (RefSeq) RGMA, RGM; repulsive guidance molecule family member a	--	--	--	Repulsive guidance molecule (RGM) C-terminus;; Repulsive guidance molecule (RGM) N-terminus;; Protein of unknown function (DUF1725)	Repulsive guidance molecule A OS=Homo sapiens OX=9606 GN=RGMA PE=1 SV=3	O	Posttranslational modification, protein turnover, chaperones	PREDICTED: repulsive guidance molecule A [Gorilla gorilla gorilla]	biological process: signaling (GO:0023052);; biological process: biological regulation (GO:0065007);; biological process: response to stimulus (GO:0050896);; biological process: cellular process (GO:0009987);; biological process: multicellular organismal process (GO:0032501);; biological process: developmental process (GO:0032502);; biological process: single-organism process (GO:0044699);; biolo…
ENSG00000204131	NHSL2	0.956006	344	0.721864	136	0.523899	109	0.47644	241	1.33731	590	0.439583	141	0.0498377	-0.943504	down	--	--	--	--	--	--	--	NHS-like	NHS-like protein 2 OS=Homo sapiens OX=9606 GN=NHSL2 PE=1 SV=1	O	Posttranslational modification, protein turnover, chaperones	NHS-like protein 2 [Homo sapiens]	--
ENSG00000153094	BCL2L11	1.96851	162	2.7079	115	3.4845	384	2.04928	114	5.1547	543	2.21409	120	7.86698e-05	-1.63286	down	--	--	--	K16341|1.45281e-101|pon:100443209|K16341 Bcl-2-like protein 11 | (RefSeq) BCL2L11; BCL2 like 11	EGFR tyrosine kinase inhibitor resistance (ko01521);; FoxO signaling pathway (ko04068);; PI3K-Akt signaling pathway (ko04151);; Apoptosis (ko04210);; Apoptosis - multiple species (ko04215);; Non-alcoholic fatty liver disease (NAFLD) (ko04932);; MicroRNAs in cancer (ko05206)	--	--	Bim protein N-terminus;; Bcl-x interacting, BH3 domain	Bcl-2-like protein 11 OS=Homo sapiens OX=9606 GN=BCL2L11 PE=1 SV=1	O	Posttranslational modification, protein turnover, chaperones	bcl-2-like protein 11 isoform X1 [Pongo abelii]	--
ENSG00000196227	FAM217B	0.753798	142	0.754249	146	1.49817	266	0.348424	70	1.36904	274	0.734666	167	0.0375038	-0.868113	down	--	--	--	--	--	--	--	FAM217 family	Protein FAM217B OS=Homo sapiens OX=9606 GN=FAM217B PE=2 SV=1	O	Posttranslational modification, protein turnover, chaperones	PREDICTED: protein FAM217B isoform X1 [Homo sapiens]	--
ENSG00000167513	CDT1	17.572	2127	13.6499	1695	17.6961	1996	9.63714	1214	19.8693	2530	9.93933	1441	0.00505779	-0.6237	down	--	--	--	K10727|0|hsa:81620|K10727 chromatin licensing and DNA replication factor 1 | (RefSeq) CDT1, DUP, RIS2; chromatin licensing and DNA replication factor 1	--	[L]	Replication, recombination and repair	DNA replication factor CDT1 like;; DNA replication factor Cdt1 C-terminal domain	DNA replication factor Cdt1 OS=Homo sapiens OX=9606 GN=CDT1 PE=1 SV=3	L	Replication, recombination and repair	DNA replication factor Cdt1 [Homo sapiens]	--
Human_newGene_39578	--	2.55538	329	2.30056	226	3.10753	292	1.84862	213	3.42485	398	1.77992	233	0.046804	-0.607058	down	--	--	Molecular Function: single-stranded DNA binding (GO:0003697);; Molecular Function: endonuclease activity (GO:0004519);; Molecular Function: ATP binding (GO:0005524);; Biological Process: obsolete ATP catabolic process (GO:0006200);; Biological Process: mismatch repair (GO:0006298);; Biological Process: reciprocal meiotic recombination (GO:0007131);; Biological Process: somatic hypermutation of im…	K10858|0|hsa:5395|K10858 DNA mismatch repair protein PMS2 | (RefSeq) PMS2, HNPCC4, MLH4, PMS2CL, PMSL2; PMS1 homolog 2, mismatch repair system component	Mismatch repair (ko03430);; Fanconi anemia pathway (ko03460)	[L]	Replication, recombination and repair	MutL C terminal dimerisation domain	Mismatch repair endonuclease PMS2 OS=Homo sapiens OX=9606 GN=PMS2 PE=1 SV=2	L	Replication, recombination and repair	mismatch repair endonuclease PMS2 isoform i [Homo sapiens]	cellular component: cell (GO:0005623);; cellular component: organelle part (GO:0044422);; cellular component: cell part (GO:0044464);; cellular component: organelle (GO:0043226);; cellular component: macromolecular complex (GO:0032991);; molecular function: catalytic activity (GO:0003824);; molecular function: binding (GO:0005488);; biological process: reproduction (GO:0000003);; biological proce…
ENSG00000197275	RAD54B	2.22195	189	1.29275	146	1.80322	164	1.05049	100	2.12897	216	0.886825	94	0.0493878	-0.744355	down	[S]	Function unknown	--	K10877|0|hsa:25788|K10877 DNA repair and recombination protein RAD54B [EC:3.6.4.-] | (RefSeq) RAD54B, RDH54; RAD54 homolog B (S. cerevisiae)	Homologous recombination (ko03440)	[L]	Replication, recombination and repair	SNF2 family N-terminal domain;; Helicase conserved C-terminal domain;; Type III restriction enzyme, res subunit	DNA repair and recombination protein RAD54B OS=Homo sapiens OX=9606 GN=RAD54B PE=1 SV=1	L	Replication, recombination and repair	DNA repair and recombination protein RAD54B isoform 1 [Homo sapiens]	--
ENSG00000171316	CHD7	0.672767	295	0.827136	337	1.75346	531	0.85983	283	2.15484	889	0.677777	351	0.0196781	-0.809621	down	[S]	Function unknown	--	K14437|0|ptr:464198|K14437 chromodomain-helicase-DNA-binding protein 7 [EC:3.6.4.12] | (RefSeq) CHD7; chromodomain helicase DNA binding protein 7	--	[K]	Transcription	SNF2 family N-terminal domain;; BRK domain;; Chromo (CHRromatin Organisation MOdifier) domain;; Helicase conserved C-terminal domain;; Type III restriction enzyme, res subunit;; CHDCT2 (NUC038) domain	Chromodomain-helicase-DNA-binding protein 7 OS=Homo sapiens OX=9606 GN=CHD7 PE=1 SV=3	L	Replication, recombination and repair	PREDICTED: chromodomain-helicase-DNA-binding protein 7 isoform X1 [Homo sapiens]	--
ENSG00000002016	RAD52	2.34474	164	1.54647	132	3.16231	183	1.79425	124	3.06584	249	1.17593	104	0.0498125	-0.721535	down	[L]	Replication, recombination and repair	Biological Process: DNA recombinase assembly (GO:0000730);; Molecular Function: DNA binding (GO:0003677);; Cellular Component: nucleoplasm (GO:0005654);; Biological Process: DNA double-strand break processing involved in repair via single-strand annealing (GO:0010792);; Biological Process: protein sumoylation (GO:0016925);; Biological Process: cellular response to oxidative stress (GO:0034599);; …	K10873|0|hsa:5893|K10873 DNA repair and recombination protein RAD52 | (RefSeq) RAD52; RAD52 homolog, DNA repair protein	Homologous recombination (ko03440)	[L]	Replication, recombination and repair	Rad52/22 family double-strand break repair protein	DNA repair protein RAD52 homolog OS=Homo sapiens OX=9606 GN=RAD52 PE=1 SV=1	L	Replication, recombination and repair	DNA repair protein RAD52 homolog isoform a [Homo sapiens]	cellular component: macromolecular complex (GO:0032991);; cellular component: organelle (GO:0043226);; cellular component: cell part (GO:0044464);; cellular component: cell (GO:0005623);; cellular component: organelle part (GO:0044422);; biological process: cellular component organization or biogenesis (GO:0071840);; biological process: response to stimulus (GO:0050896);; biological process: biol…
ENSG00000134899	ERCC5	0.504276	94	0.288063	51	0.227231	38	0.19381	39	1.59229	307	0.252118	56	0.0102633	-1.52344	down	[L]	Replication, recombination and repair	Molecular Function: bubble DNA binding (GO:0000405);; Molecular Function: double-stranded DNA binding (GO:0003690);; Molecular Function: single-stranded DNA binding (GO:0003697);; Molecular Function: endodeoxyribonuclease activity (GO:0004520);; Cellular Component: DNA replication factor A complex (GO:0005662);; Cellular Component: holo TFIIH complex (GO:0005675);; Biological Process: transcripti…	K10846|0|hsa:100533467|K10846 DNA excision repair protein ERCC-5 | (RefSeq) BIVM-ERCC5, ERCC5-202; BIVM-ERCC5 readthrough	Nucleotide excision repair (ko03420)	[L]	Replication, recombination and repair	XPG I-region;; XPG N-terminal domain	DNA repair protein complementing XP-G cells OS=Homo sapiens OX=9606 GN=ERCC5 PE=1 SV=3	L	Replication, recombination and repair	ERCC5-202 [Homo sapiens]	cellular component: macromolecular complex (GO:0032991);; cellular component: membrane-enclosed lumen (GO:0031974);; cellular component: organelle part (GO:0044422);; cellular component: cell (GO:0005623);; cellular component: membrane part (GO:0044425);; cellular component: cell part (GO:0044464);; cellular component: organelle (GO:0043226);; cellular component: membrane (GO:0016020);; biologica…
ENSG00000126705	AHDC1	0.543204	133	0.722229	175	1.2834	273	0.46232	114	2.13102	525	0.571441	158	0.0161345	-1.03896	down	--	--	--	--	--	--	--	Domain of unknown function (DUF4683)	AT-hook DNA-binding motif-containing protein 1 OS=Homo sapiens OX=9606 GN=AHDC1 PE=1 SV=1	L	Replication, recombination and repair	AT-hook DNA-binding motif-containing protein 1 [Homo sapiens]	--
ENSG00000113300	CNOT6	1.29372	279	1.63177	376	2.22579	459	1.3361	283	3.72595	882	1.12132	289	0.0403186	-0.746669	down	[K]	Transcription	--	K12603|0|ptr:462338|K12603 CCR4-NOT transcription complex subunit 6 [EC:3.1.13.4] | (RefSeq) CNOT6; CCR4-NOT transcription complex subunit 6	RNA degradation (ko03018)	[K]	Transcription	Endonuclease/Exonuclease/phosphatase family;; Leucine rich repeat;; Leucine Rich repeats (2 copies)	CCR4-NOT transcription complex subunit 6 OS=Homo sapiens OX=9606 GN=CNOT6 PE=1 SV=2	A	RNA processing and modification	CCR4-NOT transcription complex subunit 6 [Homo sapiens]	--
ENSG00000165494	PCF11	1.99814	575	2.30471	373	5.45083	744	1.63868	342	3.74537	966	1.70592	348	7.12851e-05	-1.10548	down	--	--	--	K14400|0|nle:100602884|K14400 pre-mRNA cleavage complex 2 protein Pcf11 | (RefSeq) PCF11; PCF11 cleavage and polyadenylation factor subunit	mRNA surveillance pathway (ko03015)	[A]	RNA processing and modification	RNA polymerase II-binding domain.	Pre-mRNA cleavage complex 2 protein Pcf11 OS=Homo sapiens OX=9606 GN=PCF11 PE=1 SV=3	A	RNA processing and modification	PREDICTED: pre-mRNA cleavage complex 2 protein Pcf11 [Nomascus leucogenys]	--
ENSG00000108861	DUSP3	8.53534	971	5.76618	739	19.4398	2722	4.01218	507	6.72284	697	3.96248	580	0.00224406	-1.34558	down	[T]	Signal transduction mechanisms	Biological Process: inactivation of MAPK activity (GO:0000188);; Cellular Component: immunological synapse (GO:0001772);; Molecular Function: protein tyrosine phosphatase activity (GO:0004725);; Cellular Component: nucleoplasm (GO:0005654);; Cellular Component: cytosol (GO:0005829);; Molecular Function: protein tyrosine/serine/threonine phosphatase activity (GO:0008138);; Molecular Function: prot…	K17614|3.55122e-122|rro:104672424|K17614 dual specificity phosphatase 3 [EC:3.1.3.16 3.1.3.48] | (RefSeq) DUSP3; dual specificity phosphatase 3	MAPK signaling pathway (ko04010)	[V]	Defense mechanisms	Dual specificity phosphatase, catalytic domain	Dual specificity protein phosphatase 3 OS=Homo sapiens OX=9606 GN=DUSP3 PE=1 SV=1	T	Signal transduction mechanisms	dual specificity protein phosphatase 3 [Homo sapiens]	molecular function: catalytic activity (GO:0003824);; molecular function: binding (GO:0005488);; biological process: cellular process (GO:0009987);; biological process: metabolic process (GO:0008152);; biological process: biological regulation (GO:0065007);; cellular component: extracellular region part (GO:0044421);; cellular component: organelle part (GO:0044422);; cellular component: cell (GO:…
ENSG00000142149	HUNK	0.319313	90	0.368217	105	0.811553	213	0.485266	95	1.44966	427	0.40155	133	0.0182322	-1.11197	down	[S]	Function unknown	Molecular Function: protein serine/threonine kinase activity (GO:0004674);; Molecular Function: ATP binding (GO:0005524);; Cellular Component: nucleus (GO:0005634);; Cellular Component: cytoplasm (GO:0005737);; Biological Process: protein phosphorylation (GO:0006468);; Biological Process: multicellular organism development (GO:0007275);; Biological Process: intracellular signal transduction (GO:0…	K08797|0|hsa:30811|K08797 hormonally upregulated Neu-associated kinase [EC:2.7.11.1] | (RefSeq) HUNK; hormonally up-regulated Neu-associated kinase	--	[T]	Signal transduction mechanisms	Protein kinase domain;; Protein tyrosine kinase;; Kinase-like;; Lipopolysaccharide kinase (Kdo/WaaP) family;; RIO1 family	Hormonally up-regulated neu tumor-associated kinase OS=Homo sapiens OX=9606 GN=HUNK PE=1 SV=1	T	Signal transduction mechanisms	hormonally up-regulated neu tumor-associated kinase [Homo sapiens]	biological process: response to stimulus (GO:0050896);; biological process: signaling (GO:0023052);; biological process: biological regulation (GO:0065007);; biological process: single-organism process (GO:0044699);; biological process: multicellular organismal process (GO:0032501);; biological process: developmental process (GO:0032502);; biological process: cellular process (GO:0009987);; biolo…
ENSG00000006432	MAP3K9	1.49466	356	1.22935	382	1.61592	460	1.25219	289	2.31741	806	0.819831	155	0.0159335	-0.936932	down	[M]	Cell wall/membrane/envelope biogenesis	Molecular Function: JUN kinase kinase kinase activity (GO:0004706);; Molecular Function: MAP kinase kinase activity (GO:0004708);; Molecular Function: protein tyrosine kinase activity (GO:0004713);; Molecular Function: ATP binding (GO:0005524);; Cellular Component: intracellular (GO:0005622);; Biological Process: regulation of transcription, DNA-templated (GO:0006355);; Biological Process: activa…	K04417|0|hsa:4293|K04417 mitogen-activated protein kinase kinase kinase 9 [EC:2.7.11.25] | (RefSeq) MAP3K9, MEKK9, MLK1, PRKE1; mitogen-activated protein kinase kinase kinase 9	--	[T]	Signal transduction mechanisms	Protein kinase domain;; Protein tyrosine kinase;; Variant SH3 domain;; SH3 domain;; Variant SH3 domain	Mitogen-activated protein kinase kinase kinase 9 OS=Homo sapiens OX=9606 GN=MAP3K9 PE=1 SV=3	T	Signal transduction mechanisms	MAP3K9 protein, partial [Homo sapiens]	cellular component: membrane (GO:0016020);; cellular component: cell part (GO:0044464);; cellular component: membrane part (GO:0044425);; cellular component: cell (GO:0005623);; molecular function: binding (GO:0005488);; molecular function: signal transducer activity (GO:0004871);; molecular function: catalytic activity (GO:0003824);; biological process: metabolic process (GO:0008152);; biologica…
ENSG00000111266	DUSP16	2.91042	492	2.62844	498	3.22558	590	1.86673	364	5.18125	1062	1.88763	437	0.0180754	-0.710506	down	[T]	Signal transduction mechanisms	--	K04459|0|hsa:80824|K04459 dual specificity MAP kinase phosphatase [EC:3.1.3.16 3.1.3.48] | (RefSeq) DUSP16, MKP-7, MKP7; dual specificity phosphatase 16	MAPK signaling pathway (ko04010)	[V]	Defense mechanisms	Dual specificity phosphatase, catalytic domain;; Rhodanese-like domain	Dual specificity protein phosphatase 16 OS=Homo sapiens OX=9606 GN=DUSP16 PE=1 SV=1	T	Signal transduction mechanisms	dual specificity protein phosphatase 16 [Homo sapiens]	--
ENSG00000074964	ARHGEF10L	0.206011	35	0.316299	55	0.696354	111	0.221449	39	0.966234	173	0.246626	50	0.0336072	-1.13444	down	--	--	--	K16727|0|hsa:55160|K16727 Rho guanine nucleotide exchange factor 10 | (RefSeq) ARHGEF10L, GrinchGEF; Rho guanine nucleotide exchange factor 10 like	--	[T]	Signal transduction mechanisms	RhoGEF domain	Rho guanine nucleotide exchange factor 10-like protein OS=Homo sapiens OX=9606 GN=ARHGEF10L PE=1 SV=3	T	Signal transduction mechanisms	rho guanine nucleotide exchange factor 10-like protein isoform 1 [Homo sapiens]	--
ENSG00000135503	ACVR1B	2.9306	286	2.323	198	5.05023	489	2.35867	261	5.71323	455	2.27798	278	0.0216546	-0.760562	down	[T]	Signal transduction mechanisms	Biological Process: G1/S transition of mitotic cell cycle (GO:0000082);; Biological Process: in utero embryonic development (GO:0001701);; Biological Process: hair follicle development (GO:0001942);; Molecular Function: signal transducer, downstream of receptor, with serine/threonine kinase activity (GO:0004702);; Molecular Function: ATP binding (GO:0005524);; Biological Process: central nervous …	K13567|0|ptr:451911|K13567 activin receptor type-1B [EC:2.7.11.30] | (RefSeq) ACVR1B; activin A receptor type 1B	Cytokine-cytokine receptor interaction (ko04060);; TGF-beta signaling pathway (ko04350);; Signaling pathways regulating pluripotency of stem cells (ko04550)	[T]	Signal transduction mechanisms	Protein kinase domain;; Protein tyrosine kinase;; Transforming growth factor beta type I GS-motif;; Activin types I and II receptor domain	Activin receptor type-1B OS=Homo sapiens OX=9606 GN=ACVR1B PE=1 SV=1	T	Signal transduction mechanisms	activin receptor type-1B isoform a precursor [Homo sapiens]	biological process: reproductive process (GO:0022414);; biological process: reproduction (GO:0000003);; biological process: single-organism process (GO:0044699);; biological process: developmental process (GO:0032502);; biological process: multicellular organismal process (GO:0032501);; biological process: cellular process (GO:0009987);; biological process: metabolic process (GO:0008152);; biolog…
ENSG00000145675	PIK3R1	0.302898	75	0.547381	139	1.2492	281	0.696491	140	3.34869	706	0.655067	184	0.033299	-1.15762	down	--	--	Biological Process: cellular glucose homeostasis (GO:0001678);; Biological Process: negative regulation of cell-matrix adhesion (GO:0001953);; Molecular Function: transmembrane receptor protein tyrosine kinase adaptor activity (GO:0005068);; Molecular Function: insulin receptor binding (GO:0005158);; Molecular Function: insulin-like growth factor receptor binding (GO:0005159);; Molecular Function…	K02649|0|hsa:5295|K02649 phosphoinositide-3-kinase regulatory subunit alpha/beta/delta | (RefSeq) PIK3R1, AGM7, GRB1, IMD36, p85, p85-ALPHA; phosphoinositide-3-kinase regulatory subunit 1	EGFR tyrosine kinase inhibitor resistance (ko01521);; Endocrine resistance (ko01522);; Platinum drug resistance (ko01524);; ErbB signaling pathway (ko04012);; Ras signaling pathway (ko04014);; Rap1 signaling pathway (ko04015);; cGMP-PKG signaling pathway (ko04022);; cAMP signaling pathway (ko04024);; Chemokine signaling pathway (ko04062);; HIF-1 signaling pathway (ko04066);; FoxO signaling pathwa…	[T]	Signal transduction mechanisms	Phosphatidylinositol 3-kinase regulatory subunit P85 inter-SH2 domain;; SH2 domain;; RhoGAP domain;; SH3 domain;; Variant SH3 domain	Phosphatidylinositol 3-kinase regulatory subunit alpha OS=Homo sapiens OX=9606 GN=PIK3R1 PE=1 SV=2	T	Signal transduction mechanisms	phosphatidylinositol 3-kinase regulatory subunit alpha isoform 1 [Homo sapiens]	molecular function: binding (GO:0005488);; molecular function: catalytic activity (GO:0003824);; molecular function: signal transducer activity (GO:0004871);; molecular function: molecular function regulator (GO:0098772);; biological process: metabolic process (GO:0008152);; biological process: locomotion (GO:0040011);; biological process: cellular process (GO:0009987);; biological process: immun…
ENSG00000172081	MOB3A	1.97448	210	1.97967	212	2.13768	220	1.63162	130	3.35446	368	0.784993	108	0.0368899	-0.807703	down	--	--	--	--	--	[D]	Cell cycle control, cell division, chromosome partitioning	Mob1/phocein family	MOB kinase activator 3A OS=Homo sapiens OX=9606 GN=MOB3A PE=1 SV=1	T	Signal transduction mechanisms	MOB kinase activator 3A [Homo sapiens]	--
ENSG00000067182	TNFRSF1A	9.86522	700	13.4848	993	16.9799	1077	7.42889	585	23.133	1914	10.0719	801	0.0489038	-0.621252	down	--	--	--	K03158|0|hsa:7132|K03158 tumor necrosis factor receptor superfamily member 1A | (RefSeq) TNFRSF1A, CD120a, FPF, TBP1, TNF-R, TNF-R-I, TNF-R55, TNFAR, TNFR1, TNFR55, TNFR60, p55, p55-R, p60; TNF receptor superfamily member 1A	MAPK signaling pathway (ko04010);; Cytokine-cytokine receptor interaction (ko04060);; NF-kappa B signaling pathway (ko04064);; Sphingolipid signaling pathway (ko04071);; mTOR signaling pathway (ko04150);; Apoptosis (ko04210);; Apoptosis - multiple species (ko04215);; Osteoclast differentiation (ko04380);; TNF signaling pathway (ko04668);; Adipocytokine signaling pathway (ko04920);; Insulin resist…	--	--	TNFR/NGFR cysteine-rich region;; Death domain	Tumor necrosis factor receptor superfamily member 1A OS=Homo sapiens OX=9606 GN=TNFRSF1A PE=1 SV=1	T	Signal transduction mechanisms	tumor necrosis factor receptor superfamily member 1A isoform 1 precursor [Homo sapiens]	--
ENSG00000171105	INSR	0.709462	92	0.248116	86	0.506858	161	0.283036	99	0.930709	309	0.442921	116	0.0439349	-0.88168	down	--		--	K04527|0|hsa:3643|K04527 insulin receptor [EC:2.7.10.1] | (RefSeq) INSR, CD220, HHF5; insulin receptor	Ras signaling pathway (ko04014);; Rap1 signaling pathway (ko04015);; cGMP-PKG signaling pathway (ko04022);; HIF-1 signaling pathway (ko04066);; FoxO signaling pathway (ko04068);; Phospholipase D signaling pathway (ko04072);; mTOR signaling pathway (ko04150);; PI3K-Akt signaling pathway (ko04151);; AMPK signaling pathway (ko04152);; Longevity regulating pathway (ko04211);; Longevity regulating pat…	[T]	Signal transduction mechanisms	Protein tyrosine kinase;; Receptor L domain;; Protein kinase domain;; Furin-like cysteine rich region;; Fibronectin type III domain	Insulin receptor OS=Homo sapiens OX=9606 GN=INSR PE=1 SV=4	T	Signal transduction mechanisms	insulin receptor isoform Short preproprotein [Homo sapiens]	--
ENSG00000186111	PIP5K1C	1.78225	291	1.88223	322	3.25361	516	1.28131	224	3.69324	681	1.29009	200	0.00577782	-0.987319	down	--	--	Cellular Component: phagocytic cup (GO:0001891);; Cellular Component: uropod (GO:0001931);; Molecular Function: protein binding (GO:0005515);; Molecular Function: ATP binding (GO:0005524);; Cellular Component: nucleus (GO:0005634);; Cellular Component: cytosol (GO:0005829);; Cellular Component: focal adhesion (GO:0005925);; Biological Process: phosphatidylinositol biosynthetic process (GO:0006661…	K00889|0|hsa:23396|K00889 1-phosphatidylinositol-4-phosphate 5-kinase [EC:2.7.1.68] | (RefSeq) PIP5K1C, LCCS3, PIP5K-GAMMA, PIP5K1-gamma, PIP5Kgamma; phosphatidylinositol-4-phosphate 5-kinase type 1 gamma	Inositol phosphate metabolism (ko00562);; Phosphatidylinositol signaling system (ko04070);; Phospholipase D signaling pathway (ko04072);; Endocytosis (ko04144);; Focal adhesion (ko04510);; Fc gamma R-mediated phagocytosis (ko04666);; Regulation of actin cytoskeleton (ko04810);; Choline metabolism in cancer (ko05231)	[T]	Signal transduction mechanisms	Phosphatidylinositol-4-phosphate 5-Kinase	Phosphatidylinositol 4-phosphate 5-kinase type-1 gamma OS=Homo sapiens OX=9606 GN=PIP5K1C PE=1 SV=2	T	Signal transduction mechanisms	phosphatidylinositol 4-phosphate 5-kinase type-1 gamma isoform 2 [Homo sapiens]	biological process: cellular component organization or biogenesis (GO:0071840);; biological process: single-organism process (GO:0044699);; biological process: immune system process (GO:0002376);; biological process: locomotion (GO:0040011);; biological process: cellular process (GO:0009987);; biological process: metabolic process (GO:0008152);; biological process: presynaptic process involved in…
ENSG00000126822	PLEKHG3	3.61267	952	3.62233	726	4.50481	1082	3.04812	839	5.2812	1500	2.32067	677	0.0105683	-0.648258	down	--	--	--	--	--	--	--	RhoGEF domain;; PH domain	Pleckstrin homology domain-containing family G member 3 OS=Homo sapiens OX=9606 GN=PLEKHG3 PE=1 SV=1	T	Signal transduction mechanisms	PREDICTED: pleckstrin homology domain-containing family G member 3 isoform X4 [Gorilla gorilla gorilla]	--
ENSG00000146112	PPP1R18	9.27168	1575	7.08765	857	8.56689	1345	6.27658	700	11.0445	1872	7.09021	1425	0.00573883	-0.714058	down	--	--	Molecular Function: actin binding (GO:0003779);; Cellular Component: cytoplasm (GO:0005737);; Cellular Component: cytoskeleton (GO:0005856);; Molecular Function: phosphatase binding (GO:0019902);;	K17559|0|hsa:170954|K17559 phostensin | (RefSeq) PPP1R18, HKMT1098, KIAA1949; protein phosphatase 1 regulatory subunit 18	--	--	--	PP1-regulatory protein, Phostensin N-terminal;; Phostensin PP1-binding and SH3-binding region	Phostensin OS=Homo sapiens OX=9606 GN=PPP1R18 PE=1 SV=1	T	Signal transduction mechanisms	PPP1R18 [Homo sapiens]	cellular component: cell part (GO:0044464);; cellular component: organelle (GO:0043226);; cellular component: cell (GO:0005623);; molecular function: binding (GO:0005488);;
ENSG00000152402	GUCY1A2	0.188262	116	0.133381	83	0.168258	97	0.085902	55	0.376368	244	0.135236	99	0.0321013	-0.935196	down	[T]	Signal transduction mechanisms	--	K12318|0|hsa:2977|K12318 guanylate cyclase soluble subunit alpha [EC:4.6.1.2] | (RefSeq) GUCY1A2, GC-SA2, GUC1A2; guanylate cyclase 1 soluble subunit alpha 2	Purine metabolism (ko00230);; cGMP-PKG signaling pathway (ko04022);; Vascular smooth muscle contraction (ko04270);; Gap junction (ko04540);; Platelet activation (ko04611);; Circadian entrainment (ko04713);; Long-term depression (ko04730);; Oxytocin signaling pathway (ko04921);; Renin secretion (ko04924);; Salivary secretion (ko04970)	[F]	Nucleotide transport and metabolism	Adenylate and Guanylate cyclase catalytic domain;; Heme NO binding associated;; Haem-NO-binding	Guanylate cyclase soluble subunit alpha-2 OS=Homo sapiens OX=9606 GN=GUCY1A2 PE=1 SV=1	T	Signal transduction mechanisms	guanylate cyclase soluble subunit alpha-2 isoform 2 [Homo sapiens]	--
ENSG00000268643	AC006486.1	1.61657	39	0	0	2.86698	65	0.045086	2	4.63789	118	1.74369	50	0.0289759	-2.16511	down	[T]	Signal transduction mechanisms	Biological Process: regulation of systemic arterial blood pressure (GO:0003073);; Biological Process: cardiac left ventricle morphogenesis (GO:0003214);; Molecular Function: protein serine/threonine kinase activity (GO:0004674);; Molecular Function: ATP binding (GO:0005524);; Cellular Component: mitochondrion (GO:0005739);; Cellular Component: cytosol (GO:0005829);; Biological Process: regulation…	K08822|3.70078e-109|cfr:102506445|K08822 glycogen synthase kinase 3 alpha [EC:2.7.11.26] | (RefSeq) glycogen synthase kinase-3 alpha	Chemokine signaling pathway (ko04062);; Dopaminergic synapse (ko04728);; Non-alcoholic fatty liver disease (NAFLD) (ko04932)	[G]	Carbohydrate transport and metabolism	Protein kinase domain;; Protein tyrosine kinase	Glycogen synthase kinase-3 alpha OS=Homo sapiens OX=9606 GN=GSK3A PE=1 SV=2	T	Signal transduction mechanisms	GSK3A isoform 2 [Pongo abelii]	biological process: signaling (GO:0023052);; biological process: biological regulation (GO:0065007);; biological process: response to stimulus (GO:0050896);; biological process: localization (GO:0051179);; biological process: locomotion (GO:0040011);; biological process: cellular process (GO:0009987);; biological process: metabolic process (GO:0008152);; biological process: cellular component org…
ENSG00000105810	CDK6	1.49656	351	1.34493	303	1.15901	370	0.968003	284	1.90043	686	0.842381	292	0.0344272	-0.662751	down	[M]	Cell wall/membrane/envelope biogenesis	--	K02091|0|rro:104682750|K02091 cyclin-dependent kinase 6 [EC:2.7.11.22] | (RefSeq) CDK6; cyclin dependent kinase 6	Cell cycle (ko04110);; p53 signaling pathway (ko04115);; PI3K-Akt signaling pathway (ko04151);; Hepatitis B (ko05161);; Measles (ko05162);; Pathways in cancer (ko05200);; Viral carcinogenesis (ko05203);; MicroRNAs in cancer (ko05206);; Pancreatic cancer (ko05212);; Glioma (ko05214);; Melanoma (ko05218);; Chronic myeloid leukemia (ko05220);; Small cell lung cancer (ko05222);; Non-small cell lung c…	[R]	General function prediction only	Protein kinase domain;; Protein tyrosine kinase;; Phosphotransferase enzyme family;; Lipopolysaccharide kinase (Kdo/WaaP) family	Cyclin-dependent kinase 6 OS=Homo sapiens OX=9606 GN=CDK6 PE=1 SV=1	T	Signal transduction mechanisms	cyclin-dependent kinase 6 [Homo sapiens]	--
ENSG00000173281	PPP1R3B	0.689697	145	0.821007	175	3.06055	603	1.07368	232	5.00926	1107	1.49614	372	0.0141855	-1.24168	down	--	--	Cellular Component: protein phosphatase type 1 complex (GO:0000164);; Molecular Function: phosphoprotein phosphatase activity (GO:0004721);; Biological Process: regulation of glycogen biosynthetic process (GO:0005979);; Biological Process: regulation of glycogen catabolic process (GO:0005981);; Biological Process: protein dephosphorylation (GO:0006470);; Molecular Function: protein phosphatase re…	K07189|0|hsa:79660|K07189 protein phosphatase 1 regulatory subunit 3A/B/C/D/E | (RefSeq) PPP1R3B, GL, PPP1R4, PTG; protein phosphatase 1 regulatory subunit 3B	Insulin signaling pathway (ko04910);; Insulin resistance (ko04931)	[OT]	Posttranslational modification, protein turnover, chaperones;; Signal transduction mechanisms	Carbohydrate/starch-binding module (family 21);; Starch/carbohydrate-binding module (family 53)	Protein phosphatase 1 regulatory subunit 3B OS=Homo sapiens OX=9606 GN=PPP1R3B PE=1 SV=1	T	Signal transduction mechanisms	protein phosphatase 1 regulatory subunit 3B [Homo sapiens]	cellular component: organelle (GO:0043226);; cellular component: cell part (GO:0044464);; cellular component: macromolecular complex (GO:0032991);; cellular component: cell (GO:0005623);; biological process: metabolic process (GO:0008152);; biological process: cellular process (GO:0009987);; biological process: biological regulation (GO:0065007);; molecular function: binding (GO:0005488);; molecu…
ENSG00000169118	CSNK1G1	1.37408	345	1.63022	329	1.78804	401	1.09775	212	3.70182	900	1.16972	279	0.00553866	-0.982176	down	[T]	Signal transduction mechanisms	--	K08958|0|pps:100974960|K08958 casein kinase 1, gamma [EC:2.7.11.1] | (RefSeq) CSNK1G1; casein kinase 1 gamma 1	Hedgehog signaling pathway (ko04340)	[T]	Signal transduction mechanisms	Protein kinase domain;; Casein kinase 1 gamma C terminal;; Protein tyrosine kinase	Casein kinase I isoform gamma-1 OS=Homo sapiens OX=9606 GN=CSNK1G1 PE=1 SV=1	T	Signal transduction mechanisms	casein kinase I isoform gamma-1 isoform 1 [Homo sapiens]	--
ENSG00000166484	MAPK7	8.43013	863	7.0764	801	9.98881	992	4.57475	481	8.94164	1018	4.40545	510	0.012118	-0.695668	down	[T]	Signal transduction mechanisms	Molecular Function: MAP kinase activity (GO:0004707);; Molecular Function: ATP binding (GO:0005524);; Cellular Component: cytosol (GO:0005829);; Biological Process: cell cycle (GO:0007049);; Cellular Component: integral component of membrane (GO:0016021);; Cellular Component: PML body (GO:0016605);; Biological Process: peptidyl-serine phosphorylation (GO:0018105);; Biological Process: cAMP-mediat…	K04464|0|hsa:5598|K04464 mitogen-activated protein kinase 7 [EC:2.7.11.24] | (RefSeq) MAPK7, BMK1, ERK4, ERK5, PRKM7; mitogen-activated protein kinase 7	MAPK signaling pathway (ko04010);; Gap junction (ko04540);; Neurotrophin signaling pathway (ko04722);; GnRH signaling pathway (ko04912);; Oxytocin signaling pathway (ko04921);; MicroRNAs in cancer (ko05206)	[T]	Signal transduction mechanisms	Protein kinase domain;; Protein tyrosine kinase	Mitogen-activated protein kinase 7 OS=Homo sapiens OX=9606 GN=MAPK7 PE=1 SV=2	T	Signal transduction mechanisms	PREDICTED: mitogen-activated protein kinase 7 isoform X2 [Pan troglodytes]	biological process: response to stimulus (GO:0050896);; biological process: single-organism process (GO:0044699);; biological process: developmental process (GO:0032502);; biological process: metabolic process (GO:0008152);; biological process: cellular process (GO:0009987);; biological process: biological regulation (GO:0065007);; biological process: signaling (GO:0023052);; molecular function: …
ENSG00000166483	WEE1	3.56892	353	2.96172	281	7.19172	703	4.35916	406	7.97137	830	3.74149	411	0.0188532	-0.785437	down	[T]	Signal transduction mechanisms	Biological Process: G2/M transition of mitotic cell cycle (GO:0000086);; Biological Process: microtubule cytoskeleton organization (GO:0000226);; Molecular Function: magnesium ion binding (GO:0000287);; Molecular Function: protein serine/threonine kinase activity (GO:0004674);; Molecular Function: non-membrane spanning protein tyrosine kinase activity (GO:0004715);; Molecular Function: protein bi…	K06632|0|nle:100590563|K06632 wee1-like protein kinase [EC:2.7.11.1] | (RefSeq) WEE1; WEE1 G2 checkpoint kinase	Cell cycle (ko04110)	[D]	Cell cycle control, cell division, chromosome partitioning	Protein kinase domain;; Protein tyrosine kinase	Wee1-like protein kinase OS=Homo sapiens OX=9606 GN=WEE1 PE=1 SV=2	T	Signal transduction mechanisms	PREDICTED: wee1-like protein kinase isoform X3 [Nomascus leucogenys]	biological process: cellular component organization or biogenesis (GO:0071840);; biological process: developmental process (GO:0032502);; biological process: single-organism process (GO:0044699);; biological process: metabolic process (GO:0008152);; biological process: cellular process (GO:0009987);; biological process: biological regulation (GO:0065007);; molecular function: catalytic activity (…
ENSG00000134853	PDGFRA	0.495537	103	1.00992	168	1.3785	281	0.735405	115	2.63347	562	0.768586	187	0.0360611	-0.990827	down	[T]	Signal transduction mechanisms	Biological Process: luteinization (GO:0001553);; Biological Process: in utero embryonic development (GO:0001701);; Biological Process: hematopoietic progenitor cell differentiation (GO:0002244);; Molecular Function: platelet-derived growth factor alpha-receptor activity (GO:0005018);; Molecular Function: vascular endothelial growth factor-activated receptor activity (GO:0005021);; Molecular Funct…	K04363|0|hsa:5156|K04363 platelet-derived growth factor receptor alpha [EC:2.7.10.1] | (RefSeq) PDGFRA, CD140A, PDGFR-2, PDGFR2; platelet derived growth factor receptor alpha	EGFR tyrosine kinase inhibitor resistance (ko01521);; MAPK signaling pathway (ko04010);; Ras signaling pathway (ko04014);; Rap1 signaling pathway (ko04015);; Calcium signaling pathway (ko04020);; Cytokine-cytokine receptor interaction (ko04060);; Phospholipase D signaling pathway (ko04072);; Endocytosis (ko04144);; PI3K-Akt signaling pathway (ko04151);; Focal adhesion (ko04510);; Gap junction (ko…	[T]	Signal transduction mechanisms	Protein tyrosine kinase;; Protein kinase domain;; Immunoglobulin domain;; Immunoglobulin I-set domain;; Immunoglobulin domain;; Immunoglobulin domain	Platelet-derived growth factor receptor alpha OS=Homo sapiens OX=9606 GN=PDGFRA PE=1 SV=1	T	Signal transduction mechanisms	platelet-derived growth factor receptor alpha isoform 4 [Homo sapiens]	cellular component: membrane (GO:0016020);; cellular component: organelle (GO:0043226);; cellular component: cell part (GO:0044464);; cellular component: membrane part (GO:0044425);; cellular component: macromolecular complex (GO:0032991);; cellular component: cell (GO:0005623);; biological process: response to stimulus (GO:0050896);; biological process: biological regulation (GO:0065007);; biolo…
ENSG00000169047	IRS1	1.74917	643	2.46613	918	2.9558	1018	1.11489	421	3.80752	1474	1.46519	637	0.04069	-0.666634	down	--	--	--	K16172|0|hsa:3667|K16172 insulin receptor substrate 1 | (RefSeq) IRS1, HIRS-1; insulin receptor substrate 1	cGMP-PKG signaling pathway (ko04022);; FoxO signaling pathway (ko04068);; mTOR signaling pathway (ko04150);; PI3K-Akt signaling pathway (ko04151);; AMPK signaling pathway (ko04152);; Longevity regulating pathway (ko04211);; Longevity regulating pathway - multiple species (ko04213);; Neurotrophin signaling pathway (ko04722);; Insulin signaling pathway (ko04910);; Adipocytokine signaling pathway (k…	--	--	PTB domain (IRS-1 type);; PH domain	Insulin receptor substrate 1 OS=Homo sapiens OX=9606 GN=IRS1 PE=1 SV=1	T	Signal transduction mechanisms	insulin receptor substrate 1 [Homo sapiens]	--
ENSG00000160551	TAOK1	4.40271	1159	4.41035	1272	5.16775	1731	3.53181	963	10.1842	3720	3.9952	1326	0.00603224	-0.871096	down	[T]	Signal transduction mechanisms	Molecular Function: signal transducer, downstream of receptor, with serine/threonine kinase activity (GO:0004702);; Molecular Function: protein binding (GO:0005515);; Molecular Function: ATP binding (GO:0005524);; Cellular Component: cytosol (GO:0005829);; Biological Process: DNA repair (GO:0006281);; Biological Process: sister chromatid cohesion (GO:0007062);; Biological Process: G2 DNA damage c…	K04429|0|ptr:454548|K04429 thousand and one amino acid protein kinase [EC:2.7.11.1] | (RefSeq) TAOK1; TAO kinase 1	MAPK signaling pathway (ko04010)	[T]	Signal transduction mechanisms	Protein kinase domain;; Protein tyrosine kinase	Serine/threonine-protein kinase TAO1 OS=Homo sapiens OX=9606 GN=TAOK1 PE=1 SV=1	T	Signal transduction mechanisms	serine/threonine-protein kinase TAO1 isoform 1 [Homo sapiens]	biological process: biological regulation (GO:0065007);; biological process: signaling (GO:0023052);; biological process: metabolic process (GO:0008152);; biological process: cellular process (GO:0009987);; biological process: single-organism process (GO:0044699);; biological process: cellular component organization or biogenesis (GO:0071840);; biological process: response to stimulus (GO:0050896…
ENSG00000100311	PDGFB	0	0	0.104473	15	0.847865	106	0.176634	25	2.40196	335	0.259926	41	0.0249167	-2.39202	down	--	--	--	K17386|6.35833e-155|hsa:5155|K17386 platelet-derived growth factor subunit B | (RefSeq) PDGFB, IBGC5, PDGF-2, PDGF2, SIS, SSV, c-sis; platelet derived growth factor subunit B	EGFR tyrosine kinase inhibitor resistance (ko01521);; MAPK signaling pathway (ko04010);; Ras signaling pathway (ko04014);; Rap1 signaling pathway (ko04015);; Cytokine-cytokine receptor interaction (ko04060);; Phospholipase D signaling pathway (ko04072);; PI3K-Akt signaling pathway (ko04151);; Focal adhesion (ko04510);; Gap junction (ko04540);; Regulation of actin cytoskeleton (ko04810);; HTLV-I i…	--	--	PDGF/VEGF domain;; Platelet-derived growth factor, N terminal region	Platelet-derived growth factor subunit B OS=Homo sapiens OX=9606 GN=PDGFB PE=1 SV=1	T	Signal transduction mechanisms	platelet-derived growth factor subunit B isoform 1 preproprotein [Homo sapiens]	--
ENSG00000172840	PDP2	1.32557	253	1.37786	35	1.3532	60	0.555754	27	3.1868	653	1.09696	224	0.0196257	-1.76013	down	--	--	Molecular Function: magnesium-dependent protein serine/threonine phosphatase activity (GO:0004724);; Molecular Function: [pyruvate dehydrogenase (lipoamide)] phosphatase activity (GO:0004741);; Cellular Component: mitochondrial matrix (GO:0005759);; Biological Process: protein dephosphorylation (GO:0006470);; Biological Process: regulation of acetyl-CoA biosynthetic process from pyruvate (GO:0010…	K01102|0|hsa:57546|K01102 pyruvate dehydrogenase phosphatase [EC:3.1.3.43] | (RefSeq) PDP2, PDPC_2, PPM2B, PPM2C2; pyruvate dehyrogenase phosphatase catalytic subunit 2	--	[T]	Signal transduction mechanisms	Protein phosphatase 2C	[Pyruvate dehydrogenase [acetyl-transferring]]-phosphatase 2, mitochondrial OS=Homo sapiens OX=9606 GN=PDP2 PE=2 SV=2	T	Signal transduction mechanisms	PREDICTED: [Pyruvate dehydrogenase [acetyl-transferring]]-phosphatase 2, mitochondrial isoform X1 [Chlorocebus sabaeus]	cellular component: organelle (GO:0043226);; cellular component: cell part (GO:0044464);; cellular component: membrane-enclosed lumen (GO:0031974);; cellular component: cell (GO:0005623);; cellular component: organelle part (GO:0044422);; molecular function: binding (GO:0005488);; molecular function: catalytic activity (GO:0003824);; biological process: metabolic process (GO:0008152);; biological…
ENSG00000071575	TRIB2	1.85128	221	2.12901	321	3.14455	441	1.74009	224	6.28013	986	1.97837	329	0.0311717	-0.889349	down	[NW]	Cell motility;; Extracellular structures	Molecular Function: protein kinase activity (GO:0004672);; Molecular Function: protein kinase inhibitor activity (GO:0004860);; Molecular Function: ATP binding (GO:0005524);; Cellular Component: nucleus (GO:0005634);; Cellular Component: cytoplasm (GO:0005737);; Cellular Component: cytoskeleton (GO:0005856);; Biological Process: JNK cascade (GO:0007254);; Molecular Function: transcription factor …	K08814|0|hsa:28951|K08814 tribbles homolog 1/2 | (RefSeq) TRIB2, C5FW, GS3955, TRB2; tribbles pseudokinase 2	--	[T]	Signal transduction mechanisms	Protein kinase domain;; Protein tyrosine kinase	Tribbles homolog 2 OS=Homo sapiens OX=9606 GN=TRIB2 PE=1 SV=1	T	Signal transduction mechanisms	tribbles homolog 2 [Homo sapiens]	molecular function: molecular function regulator (GO:0098772);; molecular function: catalytic activity (GO:0003824);; molecular function: binding (GO:0005488);; biological process: metabolic process (GO:0008152);; biological process: cellular process (GO:0009987);; biological process: signaling (GO:0023052);; biological process: biological regulation (GO:0065007);; biological process: response to…
ENSG00000205268	PDE7A	0.939299	118	0.638807	89	1.90022	238	0.85918	122	2.26838	325	1.01002	156	0.0329035	-0.89683	down	--	--	Molecular Function: 3',5'-cyclic-AMP phosphodiesterase activity (GO:0004115);; Cellular Component: cytosol (GO:0005829);; Biological Process: cAMP catabolic process (GO:0006198);; Cellular Component: integral component of membrane (GO:0016021);; Biological Process: cAMP-mediated signaling (GO:0019933);; Molecular Function: metal ion binding (GO:0046872);;	K18436|0|ptr:464213|K18436 high affinity cAMP-specific 3',5'-cyclic phosphodiesterase 7 [EC:3.1.4.53] | (RefSeq) PDE7A; phosphodiesterase 7A	Purine metabolism (ko00230);; Morphine addiction (ko05032)	[T]	Signal transduction mechanisms	3'5'-cyclic nucleotide phosphodiesterase	High affinity cAMP-specific 3&apos;,5&apos;-cyclic phosphodiesterase 7A OS=Homo sapiens OX=9606 GN=PDE7A PE=1 SV=2	T	Signal transduction mechanisms	high affinity cAMP-specific 3&apos;,5&apos;-cyclic phosphodiesterase 7A isoform c [Homo sapiens]	biological process: biological regulation (GO:0065007);; biological process: signaling (GO:0023052);; biological process: metabolic process (GO:0008152);; biological process: cellular process (GO:0009987);; biological process: single-organism process (GO:0044699);; biological process: response to stimulus (GO:0050896);; molecular function: catalytic activity (GO:0003824);; molecular function: bin…
ENSG00000007968	E2F2	4.21255	828	4.68016	931	6.94141	1278	3.46814	700	8.93034	1848	3.32552	773	0.011005	-0.71252	down	--	--	--	K09389|0|hsa:1870|K09389 transcription factor E2F2 | (RefSeq) E2F2, E2F-2; E2F transcription factor 2	Endocrine resistance (ko01522);; Cell cycle (ko04110);; Hepatitis B (ko05161);; HTLV-I infection (ko05166);; Pathways in cancer (ko05200);; MicroRNAs in cancer (ko05206);; Pancreatic cancer (ko05212);; Glioma (ko05214);; Prostate cancer (ko05215);; Melanoma (ko05218);; Bladder cancer (ko05219);; Chronic myeloid leukemia (ko05220);; Small cell lung cancer (ko05222);; Non-small cell lung cancer (ko…	[K]	Transcription	E2F transcription factor CC-MB domain;; E2F/DP family winged-helix DNA-binding domain	Transcription factor E2F2 OS=Homo sapiens OX=9606 GN=E2F2 PE=1 SV=1	K	Transcription	PREDICTED: transcription factor E2F2 [Gorilla gorilla gorilla]	--
ENSG00000101126	ADNP	2.0927	269	1.82183	327	7.08751	1313	2.00643	387	9.61205	1765	3.3291	800	0.0175443	-1.16493	down	--	--	--	--	--	--	--	Homeobox domain	Activity-dependent neuroprotector homeobox protein OS=Homo sapiens OX=9606 GN=ADNP PE=1 SV=1	K	Transcription	PREDICTED: activity-dependent neuroprotector homeobox protein isoform X1 [Homo sapiens]	--
ENSG00000049246	PER3	2.18193	446	2.12981	499	2.92146	631	1.85882	419	4.11485	999	1.77951	453	0.0488458	-0.588874	down	--	--	Biological Process: negative regulation of transcription from RNA polymerase II promoter (GO:0000122);; Cellular Component: nucleus (GO:0005634);; Cellular Component: cytoplasm (GO:0005737);; Molecular Function: kinase binding (GO:0019900);; Molecular Function: ubiquitin protein ligase binding (GO:0031625);; Biological Process: circadian regulation of gene expression (GO:0032922);; Biological Pro…	K02633|0|hsa:8863|K02633 period circadian protein | (RefSeq) PER3, FASPS3, GIG13; period circadian clock 3	Circadian rhythm (ko04710);; Circadian entrainment (ko04713);; Herpes simplex infection (ko05168)	[T]	Signal transduction mechanisms	Period protein 2/3C-terminal region;; PAS fold;; PAS fold;; PAS domain	Period circadian protein homolog 3 OS=Homo sapiens OX=9606 GN=PER3 PE=1 SV=4	K	Transcription	period circadian protein homolog 3 isoform 1 [Homo sapiens]	cellular component: cell part (GO:0044464);; cellular component: organelle (GO:0043226);; cellular component: cell (GO:0005623);; biological process: biological regulation (GO:0065007);; biological process: rhythmic process (GO:0048511);; biological process: single-organism process (GO:0044699);; biological process: multicellular organismal process (GO:0032501);; molecular function: binding (GO:0…
ENSG00000112242	E2F3	1.08973	183	1.42299	246	1.95079	312	1.0063	168	2.94091	523	0.910329	184	0.0497381	-0.7511	down	--	--	--	K06620|0|hsa:1871|K06620 transcription factor E2F3 | (RefSeq) E2F3, E2F-3; E2F transcription factor 3	Endocrine resistance (ko01522);; Cell cycle (ko04110);; Hepatitis B (ko05161);; HTLV-I infection (ko05166);; Pathways in cancer (ko05200);; MicroRNAs in cancer (ko05206);; Pancreatic cancer (ko05212);; Glioma (ko05214);; Prostate cancer (ko05215);; Melanoma (ko05218);; Bladder cancer (ko05219);; Chronic myeloid leukemia (ko05220);; Small cell lung cancer (ko05222);; Non-small cell lung cancer (ko…	[K]	Transcription	E2F transcription factor CC-MB domain;; E2F/DP family winged-helix DNA-binding domain	Transcription factor E2F3 OS=Homo sapiens OX=9606 GN=E2F3 PE=1 SV=1	K	Transcription	E2F3 isoform 2 [Pongo abelii]	--
ENSG00000182568	SATB1	0.343998	75	0.411149	63	0.73499	180	0.254004	78	1.21084	293	0.369332	130	0.0341964	-1.01826	down	--	--	Biological Process: negative regulation of transcription from RNA polymerase II promoter (GO:0000122);; Molecular Function: RNA polymerase II regulatory region sequence-specific DNA binding (GO:0000977);; Molecular Function: transcriptional repressor activity, RNA polymerase II transcription regulatory region sequence-specific binding (GO:0001227);; Molecular Function: chromatin binding (GO:00036…	--	--	[K]	Transcription	CUT domain;; CUT1-like DNA-binding domain of SATB;; Ubiquitin-like oligomerisation domain of SATB;; Homeobox domain	DNA-binding protein SATB1 OS=Homo sapiens OX=9606 GN=SATB1 PE=1 SV=1	K	Transcription	DNA-binding protein SATB1 isoform 1 [Homo sapiens]	molecular function: nucleic acid binding transcription factor activity (GO:0001071);; molecular function: binding (GO:0005488);; biological process: metabolic process (GO:0008152);; biological process: cellular process (GO:0009987);; biological process: single-organism process (GO:0044699);; biological process: multicellular organismal process (GO:0032501);; biological process: developmental proc…
ENSG00000215271	HOMEZ	0.516395	98	0.676677	129	1.44427	255	0.54698	106	1.53696	304	0.53306	119	0.037287	-0.894933	down	--	--	Biological Process: negative regulation of transcription from RNA polymerase II promoter (GO:0000122);; Molecular Function: DNA binding (GO:0003677);; Molecular Function: transcription factor activity, sequence-specific DNA binding (GO:0003700);; Molecular Function: transcription corepressor activity (GO:0003714);; Molecular Function: protein binding (GO:0005515);; Cellular Component: nucleolus (…	--	--	--	--	Homeodomain leucine-zipper encoding, Homez;; Homeobox domain;; Homeobox KN domain	Homeobox and leucine zipper protein Homez OS=Homo sapiens OX=9606 GN=HOMEZ PE=1 SV=2	K	Transcription	PREDICTED: homeobox and leucine zipper protein Homez isoform X1 [Chlorocebus sabaeus]	molecular function: nucleic acid binding transcription factor activity (GO:0001071);; molecular function: binding (GO:0005488);; molecular function: transcription factor activity, protein binding (GO:0000988);; biological process: biological regulation (GO:0065007);; cellular component: cell (GO:0005623);; cellular component: organelle part (GO:0044422);; cellular component: organelle (GO:0043226…
ENSG00000168779	SHOX2	1.17532	97	0.940733	68	3.29967	240	0.74369	53	2.23241	202	1.18928	99	0.00304811	-1.33426	down	--	--	--	K09331|5.23001e-155|mcf:102135375|K09331 short stature homeobox protein | (RefSeq) SHOX2; short stature homeobox 2	--	[R]	General function prediction only	Homeobox domain;; OAR domain;; Homeobox KN domain	Short stature homeobox protein 2 OS=Homo sapiens OX=9606 GN=SHOX2 PE=2 SV=4	K	Transcription	short stature homeobox protein 2 isoform a [Homo sapiens]	--
ENSG00000111424	VDR	2.43705	310	2.42726	172	2.13247	314	0.915698	117	2.79943	480	0.787747	160	8.52392e-05	-1.30122	down	--	--	--	K08539|0|mcf:102130594|K08539 vitamin D3 receptor | (RefSeq) VDR; vitamin D (1,25- dihydroxyvitamin D3) receptor	Endocrine and other factor-regulated calcium reabsorption (ko04961);; Mineral absorption (ko04978);; Tuberculosis (ko05152)	[T]	Signal transduction mechanisms	Zinc finger, C4 type (two domains);; Ligand-binding domain of nuclear hormone receptor	Vitamin D3 receptor OS=Homo sapiens OX=9606 GN=VDR PE=1 SV=1	K	Transcription	vitamin D3 receptor isoform VDRB1 [Homo sapiens]	--
ENSG00000107485	GATA3	0.744673	59	0.858648	53	2.01084	116	0.452747	38	1.9505	148	1.00289	60	0.0163965	-1.10754	down	--	--	--	K17895|0|pps:100971194|K17895 GATA-binding protein 3 | (RefSeq) GATA3; GATA binding protein 3	--	[K]	Transcription	GATA zinc finger	Trans-acting T-cell-specific transcription factor GATA-3 OS=Homo sapiens OX=9606 GN=GATA3 PE=1 SV=1	K	Transcription	trans-acting T-cell-specific transcription factor GATA-3 isoform 1 [Homo sapiens]	--
ENSG00000116205	TCEANC2	0.56878	207	0.243826	91	0.625518	184	0.429767	45	1.02038	397	0.63606	69	4.545e-06	-1.92752	down	--	--	Molecular Function: DNA binding (GO:0003677);; Molecular Function: translation elongation factor activity (GO:0003746);; Molecular Function: protein binding (GO:0005515);; Cellular Component: nucleus (GO:0005634);; Biological Process: transcription, DNA-templated (GO:0006351);; Biological Process: translational elongation (GO:0006414);;	--	--	[K]	Transcription	TFIIS helical bundle-like domain;; Transcription factor S-II (TFIIS), central domain	Transcription elongation factor A N-terminal and central domain-containing protein 2 OS=Homo sapiens OX=9606 GN=TCEANC2 PE=1 SV=1	K	Transcription	TCEANC2 isoform 4 [Pan troglodytes]	molecular function: binding (GO:0005488);; biological process: metabolic process (GO:0008152);; biological process: cellular process (GO:0009987);; cellular component: organelle (GO:0043226);; cellular component: cell part (GO:0044464);; cellular component: cell (GO:0005623);;
ENSG00000175879	HOXD8	1.43079	85	0.751508	42	1.04401	58	1.12505	65	2.67066	161	0.623324	46	0.0470711	-0.948969	down	--	--	Biological Process: negative regulation of transcription from RNA polymerase II promoter (GO:0000122);; Molecular Function: RNA polymerase II regulatory region sequence-specific DNA binding (GO:0000977);; Molecular Function: transcriptional activator activity, RNA polymerase II transcription regulatory region sequence-specific binding (GO:0001228);; Cellular Component: nucleus (GO:0005634);; Biol…	K09308|3.36036e-126|hsa:3234|K09308 homeobox protein HoxB/C/D8 | (RefSeq) HOXD8, HOX4, HOX4E, HOX5.4; homeobox D8	--	[R]	General function prediction only	Homeobox domain	Homeobox protein Hox-D8 OS=Homo sapiens OX=9606 GN=HOXD8 PE=2 SV=2	K	Transcription	homeobox protein Hox-D8 isoform 1 [Homo sapiens]	biological process: biological regulation (GO:0065007);; biological process: developmental process (GO:0032502);; biological process: single-organism process (GO:0044699);; biological process: multicellular organismal process (GO:0032501);; molecular function: nucleic acid binding transcription factor activity (GO:0001071);; molecular function: binding (GO:0005488);; cellular component: cell (GO:…
ENSG00000112182	BACH2	0.077598	27	0.107282	38	0.18027	59	0.0381	14	0.661719	146	0.316467	46	0.0413622	-1.22829	down	--	--	--	K09042|0|mcf:102142608|K09042 transcription regulator BACH | (RefSeq) BACH2; BTB domain and CNC homolog 2	--	[K]	Transcription	BTB/POZ domain;; bZIP Maf transcription factor;; bZIP transcription factor;; Basic region leucine zipper	Transcription regulator protein BACH2 OS=Homo sapiens OX=9606 GN=BACH2 PE=1 SV=1	K	Transcription	BTB and CNC homology 1, basic leucine zipper transcription factor 2 variant, partial [Homo sapiens]	--
ENSG00000082512	TRAF5	0.68075	103	0.55008	84	0.998482	142	0.441239	69	1.40829	223	0.51058	91	0.0219548	-0.93746	down	--	--	--	K09849|0|hsa:7188|K09849 TNF receptor-associated factor 5 | (RefSeq) TRAF5, MGC:39780, RNF84; TNF receptor associated factor 5	NF-kappa B signaling pathway (ko04064);; TNF signaling pathway (ko04668);; Herpes simplex infection (ko05168);; Epstein-Barr virus infection (ko05169);; Pathways in cancer (ko05200);; Viral carcinogenesis (ko05203);; Small cell lung cancer (ko05222)	[T]	Signal transduction mechanisms	TRAF-type zinc finger;; Zinc finger, C3HC4 type (RING finger)	TNF receptor-associated factor 5 OS=Homo sapiens OX=9606 GN=TRAF5 PE=1 SV=2	K	Transcription	TNF receptor-associated factor 5, isoform CRA_a [Homo sapiens]	--
ENSG00000164938	TP53INP1	1.01835	218	1.0404	226	2.90597	581	1.42692	313	4.0799	917	1.44017	365	0.0247775	-0.914362	down	--	--	--	K15310|7.13306e-146|hsa:94241|K15310 tumor protein p53-inducible nuclear protein 1 | (RefSeq) TP53INP1, SIP, TP53DINP1, TP53INP1A, TP53INP1B, Teap, p53DINP1; tumor protein p53 inducible nuclear protein 1	HTLV-I infection (ko05166)	--	--	DOR family	Tumor protein p53-inducible nuclear protein 1 OS=Homo sapiens OX=9606 GN=TP53INP1 PE=1 SV=1	K	Transcription	tumor protein p53-inducible nuclear protein 1 isoform a [Homo sapiens]	--
ENSG00000143995	MEIS1	0.326262	40	0.462511	56	0.72284	86	0.320592	44	1.74473	214	0.442384	56	0.0443733	-1.08647	down	--	--	--	K15613|0|ocu:100338305|K15613 homeobox protein Meis1 | (RefSeq) MEIS1; Meis homeobox 1	Signaling pathways regulating pluripotency of stem cells (ko04550);; Transcriptional misregulation in cancer (ko05202)	[K]	Transcription	N-terminal of Homeobox Meis and PKNOX1;; Homeobox KN domain;; Homeobox domain	Homeobox protein Meis1 OS=Homo sapiens OX=9606 GN=MEIS1 PE=1 SV=1	K	Transcription	Meis1, myeloid ecotropic viral integration site 1 homolog (mouse), isoform CRA_b [Homo sapiens]	--
ENSG00000141568	FOXK2	4.63242	829	4.89693	877	5.705	922	3.4106	594	9.34122	1743	3.95274	795	0.0285065	-0.613805	down	--	--	Molecular Function: magnesium ion binding (GO:0000287);; Molecular Function: RNA polymerase II core promoter proximal region sequence-specific DNA binding (GO:0000978);; Molecular Function: transcriptional activator activity, RNA polymerase II core promoter proximal region sequence-specific binding (GO:0001077);; Molecular Function: protein binding (GO:0005515);; Cellular Component: nucleoplasm (…	K09404|0|ptr:454996|K09404 forkhead box protein K | (RefSeq) FOXK2; forkhead box K2	--	[K]	Transcription	Forkhead domain;; FHA domain	Forkhead box protein K2 OS=Homo sapiens OX=9606 GN=FOXK2 PE=1 SV=3	K	Transcription	FOXK2 isoform 2 [Pan troglodytes]	biological process: cellular process (GO:0009987);; biological process: metabolic process (GO:0008152);; biological process: biological regulation (GO:0065007);; molecular function: nucleic acid binding transcription factor activity (GO:0001071);; molecular function: binding (GO:0005488);; cellular component: cell (GO:0005623);; cellular component: organelle part (GO:0044422);; cellular component…
ENSG00000177508	IRX3	0.551932	55	0.775418	78	1.67764	155	0.579971	59	1.97926	206	0.644163	75	0.0442103	-0.971307	down	--	--	Biological Process: metanephros development (GO:0001656);; Cellular Component: nucleus (GO:0005634);; Cellular Component: cytoplasm (GO:0005737);; Biological Process: regulation of transcription, DNA-templated (GO:0006355);; Biological Process: mesoderm development (GO:0007498);; Cellular Component: axon (GO:0030424);; Molecular Function: sequence-specific DNA binding (GO:0043565);; Biological Pr…	--	--	[K]	Transcription	Homeobox KN domain;; Homeobox domain	Iroquois-class homeodomain protein IRX-3 OS=Homo sapiens OX=9606 GN=IRX3 PE=2 SV=3	K	Transcription	homeodomain protein IRXB1 [Homo sapiens]	molecular function: binding (GO:0005488);; biological process: biological regulation (GO:0065007);; biological process: cellular process (GO:0009987);; biological process: multicellular organismal process (GO:0032501);; biological process: single-organism process (GO:0044699);; biological process: developmental process (GO:0032502);; cellular component: cell (GO:0005623);; cellular component: org…
ENSG00000178764	ZHX2	0.708484	124	0.473349	85	0.602888	99	0.274298	50	0.798074	148	0.32315	67	0.0313715	-0.882819	down	--	--	Biological Process: negative regulation of transcription from RNA polymerase II promoter (GO:0000122);; Molecular Function: DNA binding (GO:0003677);; Molecular Function: transcription factor activity, sequence-specific DNA binding (GO:0003700);; Molecular Function: transcription corepressor activity (GO:0003714);; Cellular Component: nucleoplasm (GO:0005654);; Cellular Component: nucleolus (GO:0…	--	--	--	--	Homeobox domain;; Homeobox KN domain;; Homeodomain leucine-zipper encoding, Homez	Zinc fingers and homeoboxes protein 2 OS=Homo sapiens OX=9606 GN=ZHX2 PE=1 SV=1	K	Transcription	zinc fingers and homeoboxes protein 2 [Homo sapiens]	biological process: biological regulation (GO:0065007);; biological process: cellular process (GO:0009987);; biological process: metabolic process (GO:0008152);; biological process: single-organism process (GO:0044699);; biological process: multicellular organismal process (GO:0032501);; biological process: developmental process (GO:0032502);; molecular function: transcription factor activity, pr…
ENSG00000165891	E2F7	1.6464	262	2.07809	330	3.8935	582	2.25013	291	5.86501	856	1.25669	307	0.0176057	-0.862526	down	--	--	Biological Process: negative regulation of transcription from RNA polymerase II promoter (GO:0000122);; Molecular Function: RNA polymerase II regulatory region sequence-specific DNA binding (GO:0000977);; Molecular Function: core promoter binding (GO:0001047);; Molecular Function: transcriptional repressor activity, RNA polymerase II transcription regulatory region sequence-specific binding (GO:0…	K09391|0|hsa:144455|K09391 transcription factor E2F7/8 | (RefSeq) E2F7; E2F transcription factor 7	--	[K]	Transcription	E2F/DP family winged-helix DNA-binding domain	Transcription factor E2F7 OS=Homo sapiens OX=9606 GN=E2F7 PE=1 SV=3	K	Transcription	transcription factor E2F7 [Homo sapiens]	biological process: cellular process (GO:0009987);; biological process: multicellular organismal process (GO:0032501);; biological process: single-organism process (GO:0044699);; biological process: developmental process (GO:0032502);; biological process: reproductive process (GO:0022414);; biological process: reproduction (GO:0000003);; biological process: signaling (GO:0023052);; biological pro…
ENSG00000170577	SIX2	0.468866	40	0.305971	26	0.939892	74	0.385259	34	1.201	106	0.376343	38	0.0170928	-1.16212	down	--	--	Biological Process: negative regulation of transcription from RNA polymerase II promoter (GO:0000122);; Molecular Function: RNA polymerase II core promoter proximal region sequence-specific DNA binding (GO:0000978);; Molecular Function: transcriptional activator activity, RNA polymerase II core promoter proximal region sequence-specific binding (GO:0001077);; Biological Process: organ induction (…	K19472|4.06366e-149|ptr:459197|K19472 homeobox protein SIX2 | (RefSeq) SIX2; SIX homeobox 2	--	[K]	Transcription	Transcriptional regulator, SIX1, N-terminal SD domain;; Homeobox domain;; Homeobox KN domain	Homeobox protein SIX2 OS=Homo sapiens OX=9606 GN=SIX2 PE=1 SV=1	K	Transcription	PREDICTED: homeobox protein SIX2 isoform X1 [Homo sapiens]	cellular component: organelle part (GO:0044422);; cellular component: cell (GO:0005623);; cellular component: macromolecular complex (GO:0032991);; cellular component: membrane (GO:0016020);; cellular component: organelle (GO:0043226);; cellular component: cell part (GO:0044464);; biological process: developmental process (GO:0032502);; biological process: immune system process (GO:0002376);; bio…
ENSG00000090447	TFAP4	1.19094	100	1.32227	113	1.81011	143	0.806412	69	3.07166	272	0.674374	67	0.0229066	-1.02194	down	--	--	--	K09108|1.52367e-146|hsa:7023|K09108 transcription factor AP-4 | (RefSeq) TFAP4, AP-4, bHLHc41; transcription factor AP-4	Proteoglycans in cancer (ko05205)	[K]	Transcription	Helix-loop-helix DNA-binding domain	Transcription factor AP-4 OS=Homo sapiens OX=9606 GN=TFAP4 PE=1 SV=2	K	Transcription	PREDICTED: transcription factor AP-4 [Cebus capucinus imitator]	--
ENSG00000143190	POU2F1	0.62812	332	0.58328	311	0.843165	406	0.426353	231	1.80576	1002	0.593906	371	0.0127605	-0.90974	down	--	--	--	K09364|0|nle:100599529|K09364 POU domain transcription factor, class 2 | (RefSeq) POU2F1; POU class 2 homeobox 1	--	[K]	Transcription	Pou domain - N-terminal to homeobox domain;; Homeobox domain	POU domain, class 2, transcription factor 1 OS=Homo sapiens OX=9606 GN=POU2F1 PE=1 SV=2	K	Transcription	PREDICTED: POU domain, class 2, transcription factor 1 isoform X1 [Cercocebus atys]	--
ENSG00000123095	BHLHE41	4.36711	634	4.83913	712	13.3128	1812	4.27333	638	23.9859	3669	6.20473	1066	0.00164333	-1.32439	down	--	--	--	K03730|0|ggo:101150769|K03730 class B basic helix-loop-helix protein 3 | (RefSeq) BHLHE41; basic helix-loop-helix family member e41	Circadian rhythm (ko04710)	[K]	Transcription	Helix-loop-helix DNA-binding domain;; Hairy Orange	Class E basic helix-loop-helix protein 41 OS=Homo sapiens OX=9606 GN=BHLHE41 PE=1 SV=1	K	Transcription	PREDICTED: class E basic helix-loop-helix protein 41 [Gorilla gorilla gorilla]	--
ENSG00000173894	CBX2	3.38074	541	4.30197	706	8.6669	1306	3.50202	579	11.5252	1986	3.97555	709	0.00733634	-0.93411	down	--	--	Biological Process: negative regulation of transcription from RNA polymerase II promoter (GO:0000122);; Cellular Component: euchromatin (GO:0000791);; Cellular Component: heterochromatin (GO:0000792);; Molecular Function: DNA binding (GO:0003677);; Molecular Function: chromatin binding (GO:0003682);; Cellular Component: nucleoplasm (GO:0005654);; Biological Process: protein sumoylation (GO:001692…	K11451|0|hsa:84733|K11451 chromobox protein 2 | (RefSeq) CBX2, CDCA6, M33, SRXY5; chromobox 2	--	--	--	Chromo (CHRromatin Organisation MOdifier) domain;; CBX family C-terminal motif	Chromobox protein homolog 2 OS=Homo sapiens OX=9606 GN=CBX2 PE=1 SV=2	K	Transcription	chromobox protein homolog 2 isoform 1 [Homo sapiens]	cellular component: organelle part (GO:0044422);; cellular component: cell (GO:0005623);; cellular component: macromolecular complex (GO:0032991);; cellular component: cell part (GO:0044464);; cellular component: organelle (GO:0043226);; biological process: reproductive process (GO:0022414);; biological process: reproduction (GO:0000003);; biological process: developmental process (GO:0032502);; …
ENSG00000116128	BCL9	1.92002	456	2.07634	500	3.74089	833	2.05891	503	4.92025	1232	2.21945	624	0.0435556	-0.629786	down	--	--	--	--	--	--	--	B-cell lymphoma 9 protein	B-cell CLL/lymphoma 9 protein OS=Homo sapiens OX=9606 GN=BCL9 PE=1 SV=4	K	Transcription	B-cell CLL/lymphoma 9 [Homo sapiens]	--
ENSG00000118689	FOXO3	0.618987	173	0.904849	255	1.75898	458	0.72442	207	2.92795	856	0.744653	245	0.0150974	-1.04838	down	--	--	--	K09408|0|hsa:2309|K09408 forkhead box protein O3 | (RefSeq) FOXO3, AF6q21, FKHRL1, FKHRL1P2, FOXO2, FOXO3A; forkhead box O3	EGFR tyrosine kinase inhibitor resistance (ko01521);; Chemokine signaling pathway (ko04062);; FoxO signaling pathway (ko04068);; PI3K-Akt signaling pathway (ko04151);; AMPK signaling pathway (ko04152);; Longevity regulating pathway (ko04211);; Longevity regulating pathway - multiple species (ko04213);; Neurotrophin signaling pathway (ko04722);; Prolactin signaling pathway (ko04917);; Endometrial …	[K]	Transcription	KIX-binding domain of forkhead box O, CR2;; Forkhead domain;; Transactivation domain of FOXO protein family	Forkhead box protein O3 OS=Homo sapiens OX=9606 GN=FOXO3 PE=1 SV=1	K	Transcription	forkhead box protein O3 [Homo sapiens]	--
ENSG00000137504	CREBZF	3.81987	393	5.14803	583	6.80163	860	3.47006	405	7.40501	1059	3.10689	417	0.0345667	-0.716801	down	--	--	--	--	--	--	--	bZIP transcription factor	CREB/ATF bZIP transcription factor OS=Homo sapiens OX=9606 GN=CREBZF PE=1 SV=2	K	Transcription	PREDICTED: CREB/ATF bZIP transcription factor isoform X2 [Pan paniscus]	--
ENSG00000078900	TP73	1.09557	147	0.729079	90	1.18324	133	0.443525	86	2.56004	434	0.68245	159	0.0193616	-1.06838	down	--	--	--	K10148|0|hsa:7161|K10148 tumor protein p73 | (RefSeq) TP73, P73; tumor protein p73	p53 signaling pathway (ko04115);; Hippo signaling pathway (ko04390);; Neurotrophin signaling pathway (ko04722);; Measles (ko05162)	--	--	P53 DNA-binding domain;; P53 tetramerisation motif;; SAM domain (Sterile alpha motif)	Tumor protein p73 OS=Homo sapiens OX=9606 GN=TP73 PE=1 SV=1	K	Transcription	tumor protein p73 isoform a [Homo sapiens]	--
ENSG00000164916	FOXK1	3.22916	1102	3.28837	1303	5.49838	1880	2.26958	954	7.90346	3311	3.16246	1264	0.006914	-0.825396	down	--	--	--	K09404|0|hsa:221937|K09404 forkhead box protein K | (RefSeq) FOXK1, FOXK1L; forkhead box K1	--	[K]	Transcription	Forkhead domain;; FHA domain	Forkhead box protein K1 OS=Homo sapiens OX=9606 GN=FOXK1 PE=1 SV=1	K	Transcription	forkhead box protein K1 [Homo sapiens]	--
ENSG00000173039	RELA	33.7839	3499	18.5523	1918	26.1878	2235	11.4718	1066	24.3092	2463	20.2072	2290	0.0135818	-0.678896	down	--	--	Biological Process: negative regulation of transcription from RNA polymerase II promoter (GO:0000122);; Molecular Function: RNA polymerase II core promoter proximal region sequence-specific DNA binding (GO:0000978);; Molecular Function: RNA polymerase II distal enhancer sequence-specific DNA binding (GO:0000980);; Molecular Function: transcriptional activator activity, RNA polymerase II core prom…	K04735|0|hsa:5970|K04735 transcription factor p65 | (RefSeq) RELA, NFKB3, p65; RELA proto-oncogene, NF-kB subunit	MAPK signaling pathway (ko04010);; Ras signaling pathway (ko04014);; cAMP signaling pathway (ko04024);; Chemokine signaling pathway (ko04062);; NF-kappa B signaling pathway (ko04064);; HIF-1 signaling pathway (ko04066);; Sphingolipid signaling pathway (ko04071);; PI3K-Akt signaling pathway (ko04151);; Apoptosis (ko04210);; Longevity regulating pathway (ko04211);; Osteoclast differentiation (ko043…	--	--	Rel homology DNA-binding domain;; Rel homology dimerisation domain	Transcription factor p65 OS=Homo sapiens OX=9606 GN=RELA PE=1 SV=2	K	Transcription	RELA protein [Homo sapiens]	cellular component: organelle part (GO:0044422);; cellular component: cell (GO:0005623);; cellular component: macromolecular complex (GO:0032991);; cellular component: organelle (GO:0043226);; cellular component: cell part (GO:0044464);; molecular function: nucleic acid binding transcription factor activity (GO:0001071);; molecular function: binding (GO:0005488);; biological process: multi-organi…
Human_newGene_48926	--	0.187074	35	0.575775	109	0.218503	39	0.727455	140	0.225477	45	0.464347	103	0.000292623	1.56184	up	--	--	--	--	--	--	--	--	--	--	--	PREDICTED: phosphatidylinositol 4,5-bisphosphate 5-phosphatase A-like [Pan troglodytes]	--
Human_newGene_27426	--	0.870575	89	2.27196	222	1.66046	149	3.79648	371	1.66117	163	3.05424	347	0.00120862	1.21983	up	--	--	Molecular Function: DNA binding (GO:0003677);; Molecular Function: NAD+ ADP-ribosyltransferase activity (GO:0003950);; Molecular Function: NAD(P)+-protein-arginine ADP-ribosyltransferase activity (GO:0003956);; Molecular Function: protein tyrosine phosphatase activity (GO:0004725);; Cellular Component: nucleus (GO:0005634);; Cellular Component: endoplasmic reticulum membrane (GO:0005789);; Cellul…	--	--	--	--	--	Putative uncharacterized protein FLJ38264 OS=Homo sapiens OX=9606 PE=5 SV=1	--	--	hypothetical protein EGM_16173, partial [Macaca fascicularis]	molecular function: catalytic activity (GO:0003824);; molecular function: binding (GO:0005488);; biological process: developmental process (GO:0032502);; biological process: single-organism process (GO:0044699);; biological process: multicellular organismal process (GO:0032501);; biological process: biological regulation (GO:0065007);; biological process: metabolic process (GO:0008152);; biologic…
Human_newGene_15110	--	1.07938	99	1.83528	305	1.53507	175	1.29921	158	1.84163	161	2.67952	337	0.0321271	0.838089	up	--	--	Cellular Component: extracellular region (GO:0005576);;	--	--	--	--	--	Putative uncharacterized protein FLJ38264 OS=Homo sapiens OX=9606 PE=5 SV=1	--	--	unnamed protein product [Homo sapiens]	cellular component: extracellular region (GO:0005576);;
Human_newGene_17687	--	0.321235	16	0.780302	39	0.488978	23	0.923772	47	0.435853	23	1.00632	58	0.0145053	1.18827	up	--	--	--	K13625|5.18103e-12|pps:100992627|K13625 ferritin light chain | (RefSeq) FTL; ferritin light chain	Mineral absorption (ko04978)	--	--	--	--	--	--	--	--
Human_newGene_23275	--	0	0	0.694865	83	0.094874	11	0.351586	43	0.455839	57	1.10132	152	0.0180723	2.06908	up	--	--	Cellular Component: Golgi membrane (GO:0000139);; Cellular Component: extracellular space (GO:0005615);; Cellular Component: nucleus (GO:0005634);; Cellular Component: endoplasmic reticulum membrane (GO:0005789);; Cellular Component: cis-Golgi network (GO:0005801);; Biological Process: translation (GO:0006412);; Biological Process: SRP-dependent cotranslational protein targeting to membrane (GO:0…	--	--	--	--	--	UPF0764 protein C16orf89 OS=Homo sapiens OX=9606 GN=C16orf89 PE=1 SV=2	--	--	hCG2038827, partial [Homo sapiens]	molecular function: catalytic activity (GO:0003824);; biological process: metabolic process (GO:0008152);; biological process: cellular process (GO:0009987);; biological process: biological regulation (GO:0065007);; biological process: developmental process (GO:0032502);; biological process: single-organism process (GO:0044699);; biological process: multicellular organismal process (GO:0032501);;…
Human_newGene_27194	--	26.367	415	32.5985	520	18.3749	272	35.8979	581	16.2077	269	33.7402	628	0.00598862	0.828251	up	--	--	--	--	--	--	--	--	--	--	--	--	--
Human_newGene_32080	--	58.4671	1558	69.1508	1881	39.9103	946	59.6045	1592	38.4685	1042	66.567	2055	0.0151918	0.612685	up	--	--	--	--	--	--	--	--	--	--	--	hCG39909 [Homo sapiens]	--
Human_newGene_23267	--	0.194473	22	0.485629	54	0.275949	29	0.493325	56	0.339415	40	0.492644	65	0.0440251	0.935032	up	--	--	Molecular Function: nucleic acid binding (GO:0003676);; Cellular Component: endoplasmic reticulum membrane (GO:0005789);; Biological Process: transcription, DNA-templated (GO:0006351);; Cellular Component: integral component of membrane (GO:0016021);; Biological Process: drug metabolic process (GO:0017144);; Biological Process: peptidyl-glutamic acid carboxylation (GO:0017187);; Biological Proces…	--	--	--	--	--	Putative uncharacterized protein encoded by LINC00269 OS=Homo sapiens OX=9606 GN=LINC00269 PE=5 SV=1	--	--	hypothetical protein EGK_14950, partial [Macaca mulatta]	molecular function: catalytic activity (GO:0003824);; molecular function: binding (GO:0005488);; biological process: cellular process (GO:0009987);; biological process: metabolic process (GO:0008152);; biological process: single-organism process (GO:0044699);; cellular component: organelle part (GO:0044422);; cellular component: cell (GO:0005623);; cellular component: organelle (GO:0043226);; cel…
Human_newGene_22989	--	1.17539	237	1.2138	181	1.15935	177	2.10211	435	1.05452	224	2.0244	482	0.0447789	0.764625	up	--	--	--	--	--	--	--	--	--	--	--	PREDICTED: ankyrin repeat and SOCS box protein 1 [Gorilla gorilla gorilla]	--
Human_newGene_46591	--	8.65139	381	11.5208	514	8.05284	334	9.85885	447	5.10796	238	10.5083	548	0.0458889	0.621471	up	--	--	--	--	--	--	--	--	--	--	--	--	--
Human_newGene_47402	--	0.318614	50	0.540204	85	0.480078	70	0.656483	105	0.198037	33	0.620625	114	0.0441493	0.937412	up	--	--	--	--	--	--	--	--	--	--	--	--	--
Human_newGene_6296	--	0.184729	30	0.37585	62	0.392423	55	0.883474	147	0.200061	33	1.07136	151	0.00210452	1.5641	up	--	--	--	--	--	--	--	--	--	--	--	uncharacterized protein LOC110740786 isoform X1 [Papio anubis]	--
Human_newGene_10682	--	0.289824	38	0.392668	27	0.231277	29	1.21641	113	0.124611	18	1.04431	153	0.00452672	1.72348	up	--	--	Molecular Function: DNA binding (GO:0003677);; Cellular Component: nucleus (GO:0005634);; Cellular Component: endoplasmic reticulum membrane (GO:0005789);; Biological Process: regulation of transcription from RNA polymerase II promoter (GO:0006357);; Biological Process: small molecule metabolic process (GO:0044281);; Biological Process: ceramide biosynthetic process (GO:0046513);; Molecular Funct…	--	--	--	--	--	Zinc finger protein ENSP00000375192 OS=Homo sapiens OX=9606 PE=2 SV=1	--	--	PREDICTED: zinc finger protein 454 isoform X2 [Pan troglodytes]	cellular component: cell (GO:0005623);; cellular component: organelle part (GO:0044422);; cellular component: organelle (GO:0043226);; cellular component: membrane (GO:0016020);; cellular component: cell part (GO:0044464);; cellular component: membrane part (GO:0044425);; molecular function: catalytic activity (GO:0003824);; molecular function: binding (GO:0005488);; biological process: cellular …
Human_newGene_37908	--	7.7861	520	10.3199	738	7.57022	436	12.9496	822	10.836	659	14.2162	1049	0.00717911	0.682651	up	--	--	Biological Process: eye development (GO:0001654);; Molecular Function: protein binding (GO:0005515);; Biological Process: post-Golgi vesicle-mediated transport (GO:0006892);; Biological Process: membrane organization (GO:0016044);; Cellular Component: transport vesicle (GO:0030133);; Biological Process: platelet activation (GO:0030168);; Cellular Component: BLOC-1 complex (GO:0031083);; Biologica…	--	--	--	--	--	Putative uncharacterized protein encoded by LINC00269 OS=Homo sapiens OX=9606 GN=LINC00269 PE=5 SV=1	--	--	hCG2031039 [Homo sapiens]	molecular function: binding (GO:0005488);; biological process: response to stimulus (GO:0050896);; biological process: single-organism process (GO:0044699);; biological process: multicellular organismal process (GO:0032501);; biological process: developmental process (GO:0032502);; biological process: localization (GO:0051179);; biological process: cellular process (GO:0009987);; cellular compone…
Human_newGene_2402	--	20.368	1308	27.1662	2092	26.9032	1887	33.0239	2780	19.5237	1691	29.6742	2869	0.00857787	0.639837	up	--	--	--	--	--	--	--	--	--	--	--	unnamed protein product [Macaca fascicularis]	--
ENSG00000197019	SERTAD1	13.0786	1046	25.287	2049	12.5665	943	30.7119	2523	12.6139	1063	32.4428	3069	1.30874e-08	1.30145	up	--	--	--	--	--	--	--	SERTA motif	SERTA domain-containing protein 1 OS=Homo sapiens OX=9606 GN=SERTAD1 PE=1 SV=2	--	--	SERTA domain-containing protein 1 [Homo sapiens]	--
Human_newGene_30573	--	0.426298	42	2.31589	177	0.534357	45	4.70087	419	0.618509	54	3.87636	383	1.44159e-10	2.78449	up	--	--	--	--	--	--	--	--	--	--	--	--	--
Human_newGene_36935	--	1.06692	94	1.77607	168	1.39555	163	2.13295	210	0.734424	125	1.85954	295	0.0482025	0.773753	up	--	--	Cellular Component: Golgi membrane (GO:0000139);; Cellular Component: extracellular space (GO:0005615);; Cellular Component: nucleus (GO:0005634);; Cellular Component: endoplasmic reticulum membrane (GO:0005789);; Cellular Component: cis-Golgi network (GO:0005801);; Biological Process: translation (GO:0006412);; Biological Process: SRP-dependent cotranslational protein targeting to membrane (GO:0…	--	--	--	--	--	Uncharacterized protein C9orf85 OS=Homo sapiens OX=9606 GN=C9orf85 PE=1 SV=1	--	--	similar to FKSG60, partial [Homo sapiens]	cellular component: extracellular region (GO:0005576);; cellular component: membrane part (GO:0044425);; cellular component: organelle (GO:0043226);; cellular component: cell part (GO:0044464);; cellular component: membrane (GO:0016020);; cellular component: extracellular region part (GO:0044421);; cellular component: organelle part (GO:0044422);; cellular component: cell (GO:0005623);; biologica…
Human_newGene_27297	--	0.019919	7	1.19111	271	0.299294	38	0.681157	236	0.022513	8	0.827758	227	1.28309e-09	3.71328	up	--	--	Biological Process: microtubule cytoskeleton organization (GO:0000226);; Biological Process: neuron migration (GO:0001764);; Biological Process: positive regulation of neuroblast proliferation (GO:0002052);; Molecular Function: protein binding (GO:0005515);; Cellular Component: mitochondrion (GO:0005739);; Cellular Component: centrosome (GO:0005813);; Cellular Component: membrane (GO:0016020);; B…	--	--	--	--	--	--	--	--	disrupted in schizophrenia 1, isoform CRA_b [Homo sapiens]	cellular component: cell (GO:0005623);; cellular component: organelle part (GO:0044422);; cellular component: synapse part (GO:0044456);; cellular component: membrane (GO:0016020);; cellular component: cell part (GO:0044464);; cellular component: organelle (GO:0043226);; biological process: localization (GO:0051179);; biological process: biological regulation (GO:0065007);; biological process: ce…
Human_newGene_31286	--	9.48175	587	15.0014	878	13.9971	847	27.566	1703	15.2478	993	18.5306	1463	0.0124374	0.733952	up	--	--	Cellular Component: endoplasmic reticulum membrane (GO:0005789);; Cellular Component: integral component of membrane (GO:0016021);; Biological Process: drug metabolic process (GO:0017144);; Biological Process: peptidyl-glutamic acid carboxylation (GO:0017187);; Biological Process: post-translational protein modification (GO:0043687);; Molecular Function: vitamin-K-epoxide reductase (warfarin-sens…	K05357|2.90943e-27|pps:103784246|K05357 vitamin-K-epoxide reductase (warfarin-sensitive) [EC:1.17.4.4] | (RefSeq) VKORC1; vitamin K epoxide reductase complex subunit 1	Ubiquinone and other terpenoid-quinone biosynthesis (ko00130)	--	--	--	Putative uncharacterized protein encoded by LINC00269 OS=Homo sapiens OX=9606 GN=LINC00269 PE=5 SV=1	--	--	hypothetical protein EGK_14950, partial [Macaca mulatta]	cellular component: cell part (GO:0044464);; cellular component: membrane (GO:0016020);; cellular component: organelle (GO:0043226);; cellular component: membrane part (GO:0044425);; cellular component: cell (GO:0005623);; cellular component: organelle part (GO:0044422);; biological process: cellular process (GO:0009987);; biological process: metabolic process (GO:0008152);; biological process: s…
Human_newGene_13007	--	0.593525	30	1.19344	66	0.14547	9	0.44706	23	0.409816	34	0.764673	73	0.0477573	1.1376	up	--	--	--	--	--	--	--	--	--	--	--	hCG1818647 [Homo sapiens]	--
Human_newGene_3813	--	0.064035	13	0.25211	52	0.135161	26	0.197558	42	0.143804	31	0.217421	53	0.034946	1.05592	up	--	--	Cellular Component: endoplasmic reticulum membrane (GO:0005789);; Cellular Component: integral component of membrane (GO:0016021);; Biological Process: drug metabolic process (GO:0017144);; Biological Process: peptidyl-glutamic acid carboxylation (GO:0017187);; Biological Process: post-translational protein modification (GO:0043687);; Molecular Function: vitamin-K-epoxide reductase (warfarin-sens…	--	--	--	--	--	Putative uncharacterized protein encoded by LINC00269 OS=Homo sapiens OX=9606 GN=LINC00269 PE=5 SV=1	--	--	hypothetical protein EGM_11598, partial [Macaca fascicularis]	cellular component: membrane part (GO:0044425);; cellular component: organelle (GO:0043226);; cellular component: cell part (GO:0044464);; cellular component: membrane (GO:0016020);; cellular component: cell (GO:0005623);; cellular component: organelle part (GO:0044422);; molecular function: catalytic activity (GO:0003824);; biological process: metabolic process (GO:0008152);; biological process:…
Human_newGene_37441	--	2.76656	60	3.60805	79	1.3194	27	4.15406	92	0.738196	17	3.57545	91	0.0145847	1.29129	up	--	--	Biological Process: eye development (GO:0001654);; Molecular Function: phospholipid binding (GO:0005543);; Cellular Component: cytoskeleton (GO:0005856);; Cellular Component: plasma membrane (GO:0005886);; Biological Process: phagocytosis, engulfment (GO:0006911);; Biological Process: apoptotic process (GO:0006915);; Biological Process: movement of cell or subcellular component (GO:0006928);; Bio…	--	--	--	--	--	Putative uncharacterized protein encoded by LINC00269 OS=Homo sapiens OX=9606 GN=LINC00269 PE=5 SV=1	--	--	hCG2038441, partial [Homo sapiens]	cellular component: cell (GO:0005623);; cellular component: membrane (GO:0016020);; cellular component: cell part (GO:0044464);; cellular component: organelle (GO:0043226);; cellular component: macromolecular complex (GO:0032991);; biological process: cellular process (GO:0009987);; biological process: cellular component organization or biogenesis (GO:0071840);; biological process: immune system …
Human_newGene_4093	--	1.17689	93	1.71152	166	2.00673	177	4.82946	463	2.99369	296	3.97037	420	0.0442931	0.907808	up	--	--	--	--	--	--	--	--	Putative uncharacterized protein encoded by LINC00269 OS=Homo sapiens OX=9606 GN=LINC00269 PE=5 SV=1	--	--	hCG2038441, partial [Homo sapiens]	--
Human_newGene_22988	--	0.124359	13	0.725216	50	0.440327	40	1.75529	117	0.520354	43	1.05132	97	0.00747383	1.45419	up	--	--	--	--	--	--	--	--	--	--	--	--	--
Human_newGene_27327	--	0.548114	151	0.880737	284	0.109017	33	0.562185	186	0.274547	94	0.616058	227	0.00573032	1.32326	up	--	--	Molecular Function: transcription factor activity, sequence-specific DNA binding (GO:0003700);; Cellular Component: endoplasmic reticulum membrane (GO:0005789);; Cellular Component: integral component of membrane (GO:0016021);; Cellular Component: nuclear membrane (GO:0031965);; Molecular Function: sequence-specific DNA binding (GO:0043565);; Biological Process: small molecule metabolic process (…	--	--	--	--	--	Zinc finger protein ENSP00000375192 OS=Homo sapiens OX=9606 PE=2 SV=1	--	--	hCG2040615, partial [Homo sapiens]	cellular component: membrane part (GO:0044425);; cellular component: organelle (GO:0043226);; cellular component: cell part (GO:0044464);; cellular component: membrane (GO:0016020);; cellular component: organelle part (GO:0044422);; cellular component: cell (GO:0005623);; biological process: single-organism process (GO:0044699);; biological process: biological regulation (GO:0065007);; biological…
Human_newGene_15882	--	0.296416	19	0.523152	34	0.416199	25	0.681148	45	0.23696	16	0.611901	47	0.0425594	1.03101	up	--	--	--	--	--	--	--	--	--	--	--	--	--
Human_newGene_34176	--	2.60002	114	3.56726	158	2.60468	107	4.30957	194	2.45614	114	4.4125	229	0.0342861	0.770664	up	--	--	--	--	--	--	--	--	--	--	--	PREDICTED: dual specificity tyrosine-phosphorylation-regulated kinase 3 isoform X1 [Nomascus leucogenys]	--
ENSG00000003989	SLC7A2	1.22778	307	1.61004	422	0.929869	184	1.01994	303	1.67812	188	1.11846	382	0.047021	0.676341	up	[E]	Amino acid transport and metabolism	Biological Process: nitric oxide production involved in inflammatory response (GO:0002537);; Molecular Function: high-affinity arginine transmembrane transporter activity (GO:0005289);; Molecular Function: high-affinity lysine transmembrane transporter activity (GO:0005292);; Cellular Component: integral component of plasma membrane (GO:0005887);; Biological Process: cellular amino acid metabolic…	K13864|0|hsa:6542|K13864 solute carrier family 7 (cationic amino acid transporter), member 2 | (RefSeq) SLC7A2, ATRC2, CAT2, HCAT2; solute carrier family 7 member 2	--	[E]	Amino acid transport and metabolism	Amino acid permease;; Amino acid permease;; C-terminus of AA_permease	Cationic amino acid transporter 2 OS=Homo sapiens OX=9606 GN=SLC7A2 PE=1 SV=2	E	Amino acid transport and metabolism	cationic amino acid transporter 2 isoform 1 [Homo sapiens]	molecular function: transporter activity (GO:0005215);; biological process: biological regulation (GO:0065007);; biological process: metabolic process (GO:0008152);; biological process: cellular process (GO:0009987);; biological process: localization (GO:0051179);; biological process: single-organism process (GO:0044699);; biological process: multicellular organismal process (GO:0032501);; biolog…
ENSG00000145386	CCNA2	26.0569	2758	36.7963	3945	16.4248	1631	31.6478	3440	25.626	2858	29.7808	3728	0.00689208	0.618055	up	--	--	Biological Process: regulation of cyclin-dependent protein serine/threonine kinase activity (GO:0000079);; Cellular Component: female pronucleus (GO:0001939);; Cellular Component: male pronucleus (GO:0001940);; Cellular Component: nucleoplasm (GO:0005654);; Cellular Component: Golgi apparatus (GO:0005794);; Biological Process: mitotic cell cycle (GO:0007067);; Biological Process: mitotic G2 DNA d…	K06627|0|hsa:890|K06627 cyclin A | (RefSeq) CCNA2, CCN1, CCNA; cyclin A2	Cell cycle (ko04110);; AMPK signaling pathway (ko04152);; Progesterone-mediated oocyte maturation (ko04914);; Hepatitis B (ko05161);; Epstein-Barr virus infection (ko05169);; Viral carcinogenesis (ko05203)	[D]	Cell cycle control, cell division, chromosome partitioning	N-terminal region of cyclin_N;; Cyclin, N-terminal domain;; Cyclin, C-terminal domain	Cyclin-A2 OS=Homo sapiens OX=9606 GN=CCNA2 PE=1 SV=2	D	Cell cycle control, cell division, chromosome partitioning	RecName: Full=Cyclin-A2; Short=Cyclin-A; AltName: Full=Cyclin A	molecular function: binding (GO:0005488);; biological process: cellular process (GO:0009987);; biological process: single-organism process (GO:0044699);; biological process: multicellular organismal process (GO:0032501);; biological process: developmental process (GO:0032502);; biological process: biological regulation (GO:0065007);; biological process: signaling (GO:0023052);; biological process…
ENSG00000117399	CDC20	428.503	27635	467.91	30543	188.598	11376	387.625	25561	167.975	11386	365.542	27845	0.0259791	0.706417	up	[T]	Signal transduction mechanisms	Cellular Component: spindle pole (GO:0000922);; Cellular Component: nucleoplasm (GO:0005654);; Cellular Component: anaphase-promoting complex (GO:0005680);; Cellular Component: centrosome (GO:0005813);; Cellular Component: cytosol (GO:0005829);; Biological Process: sister chromatid cohesion (GO:0007062);; Biological Process: mitotic cell cycle (GO:0007067);; Molecular Function: protein C-terminus…	K03363|0|pps:100985744|K03363 cell division cycle 20, cofactor of APC complex | (RefSeq) CDC20; cell division cycle 20	Cell cycle (ko04110);; Oocyte meiosis (ko04114);; Ubiquitin mediated proteolysis (ko04120);; HTLV-I infection (ko05166);; Viral carcinogenesis (ko05203)	[DO]	Cell cycle control, cell division, chromosome partitioning;; Posttranslational modification, protein turnover, chaperones	WD domain, G-beta repeat;; Anaphase-promoting complex subunit 4 WD40 domain;; Eukaryotic translation initiation factor eIF2A	Cell division cycle protein 20 homolog OS=Homo sapiens OX=9606 GN=CDC20 PE=1 SV=2	D	Cell cycle control, cell division, chromosome partitioning	cell division cycle protein 20 homolog [Homo sapiens]	cellular component: macromolecular complex (GO:0032991);; cellular component: organelle (GO:0043226);; cellular component: cell part (GO:0044464);; cellular component: organelle part (GO:0044422);; cellular component: cell (GO:0005623);; molecular function: molecular function regulator (GO:0098772);; molecular function: binding (GO:0005488);; biological process: cellular component organization or…
ENSG00000080986	NDC80	43.6773	3487	52.2273	4152	23.2298	1734	45.0122	3642	26.0188	2146	42.1262	3994	0.0117238	0.658923	up	--	--	Biological Process: establishment of mitotic spindle orientation (GO:0000132);; Cellular Component: condensed nuclear chromosome outer kinetochore (GO:0000942);; Molecular Function: structural constituent of cytoskeleton (GO:0005200);; Cellular Component: cytosol (GO:0005829);; Biological Process: mitotic spindle organization (GO:0007052);; Biological Process: sister chromatid cohesion (GO:000706…	K11547|0|hsa:10403|K11547 kinetochore protein NDC80 | (RefSeq) NDC80, HEC, HEC1, HsHec1, KNTC2, TID3, hsNDC80; NDC80, kinetochore complex component	--	[D]	Cell cycle control, cell division, chromosome partitioning	HEC/Ndc80p family	Kinetochore protein NDC80 homolog OS=Homo sapiens OX=9606 GN=NDC80 PE=1 SV=1	D	Cell cycle control, cell division, chromosome partitioning	kinetochore protein NDC80 homolog [Homo sapiens]	biological process: cellular process (GO:0009987);; biological process: cellular component organization or biogenesis (GO:0071840);; biological process: single-organism process (GO:0044699);; biological process: localization (GO:0051179);; molecular function: binding (GO:0005488);; molecular function: structural molecule activity (GO:0005198);; cellular component: membrane-enclosed lumen (GO:0031…
ENSG00000134057	CCNB1	132.727	9500	164.057	11939	67.5441	4699	133.594	9923	84.027	6080	136.482	11755	0.00578511	0.709298	up	--	--	Biological Process: G2/M transition of mitotic cell cycle (GO:0000086);; Cellular Component: spindle pole (GO:0000922);; Cellular Component: condensed nuclear chromosome outer kinetochore (GO:0000942);; Biological Process: oocyte maturation (GO:0001556);; Biological Process: in utero embryonic development (GO:0001701);; Biological Process: negative regulation of protein phosphorylation (GO:000193…	K05868|0|hsa:891|K05868 cyclin B | (RefSeq) CCNB1, CCNB; cyclin B1	FoxO signaling pathway (ko04068);; Cell cycle (ko04110);; Oocyte meiosis (ko04114);; p53 signaling pathway (ko04115);; Progesterone-mediated oocyte maturation (ko04914)	[D]	Cell cycle control, cell division, chromosome partitioning	Cyclin, N-terminal domain;; Cyclin, C-terminal domain	G2/mitotic-specific cyclin-B1 OS=Homo sapiens OX=9606 GN=CCNB1 PE=1 SV=1	D	Cell cycle control, cell division, chromosome partitioning	G2/mitotic-specific cyclin-B1 isoform 1 [Homo sapiens]	cellular component: cell (GO:0005623);; cellular component: organelle part (GO:0044422);; cellular component: membrane-enclosed lumen (GO:0031974);; cellular component: membrane (GO:0016020);; cellular component: cell part (GO:0044464);; cellular component: organelle (GO:0043226);; cellular component: macromolecular complex (GO:0032991);; biological process: growth (GO:0040007);; biological proce…
ENSG00000103044	HAS3	0.810259	48	1.66653	178	1.18092	50	1.82175	80	1.2377	56	1.73726	213	0.000462606	1.5705	up	[N]	Cell motility	Cellular Component: cytoplasm (GO:0005737);; Cellular Component: integral component of plasma membrane (GO:0005887);; Biological Process: cell adhesion (GO:0007155);; Biological Process: hyaluronan biosynthetic process (GO:0030213);; Cellular Component: hyaluranon cable (GO:0036117);; Biological Process: extracellular polysaccharide biosynthetic process (GO:0045226);; Biological Process: positive…	K00752|0|ptr:454195|K00752 hyaluronan synthase [EC:2.4.1.212] | (RefSeq) HAS3; hyaluronan synthase 3	--	[M]	Cell wall/membrane/envelope biogenesis	Glycosyltransferase like family 2;; Chitin synthase;; Glycosyl transferase family group 2;; Glycosyl transferase family 2;; Glycosyl transferase family 21	Hyaluronan synthase 3 OS=Homo sapiens OX=9606 GN=HAS3 PE=2 SV=3	M	Cell wall/membrane/envelope biogenesis	hyaluronan synthase 3 isoform a [Homo sapiens]	cellular component: membrane part (GO:0044425);; cellular component: cell part (GO:0044464);; cellular component: membrane (GO:0016020);; cellular component: extracellular region (GO:0005576);; cellular component: extracellular region part (GO:0044421);; cellular component: cell (GO:0005623);; molecular function: catalytic activity (GO:0003824);; biological process: single-organism process (GO:00…
ENSG00000196787	HIST1H2AG	5.6525	482	7.07311	610	2.63827	211	7.14889	625	3.39219	305	6.49787	655	0.00494581	0.907556	up	--	--	--	K11251|4.09231e-63|bacu:102998434|K11251 histone H2A | (RefSeq) histone H2A type 1-like	Alcoholism (ko05034);; Systemic lupus erythematosus (ko05322)	[B]	Chromatin structure and dynamics	C-terminus of histone H2A;; Core histone H2A/H2B/H3/H4;; Histone-like transcription factor (CBF/NF-Y) and archaeal histone	Histone H2A type 1 OS=Homo sapiens OX=9606 GN=HIST1H2AG PE=1 SV=2	B	Chromatin structure and dynamics	histone H2A type 1-like [Otolemur garnettii]	--
ENSG00000203811	HIST2H3C	2.76946	174	4.93426	314	1.67092	99	2.87725	186	1.4148	94	3.20969	238	0.0148883	0.976506	up	--	--	Biological Process: negative regulation of transcription from RNA polymerase II promoter (GO:0000122);; Biological Process: chromatin silencing at rDNA (GO:0000183);; Cellular Component: nuclear chromosome, telomeric region (GO:0000784);; Cellular Component: nuclear nucleosome (GO:0000788);; Biological Process: positive regulation of defense response to virus by host (GO:0002230);; Cellular Compo…	K11253|1.52386e-90|nle:100593725|K11253 histone H3 | (RefSeq) histone H3-like	Alcoholism (ko05034);; Transcriptional misregulation in cancer (ko05202);; Systemic lupus erythematosus (ko05322)	[B]	Chromatin structure and dynamics	Core histone H2A/H2B/H3/H4	Histone H3.2 OS=Homo sapiens OX=9606 GN=HIST2H3A PE=1 SV=3	B	Chromatin structure and dynamics	PREDICTED: uncharacterized protein LOC704845 [Macaca mulatta]	molecular function: binding (GO:0005488);; biological process: multicellular organismal process (GO:0032501);; biological process: single-organism process (GO:0044699);; biological process: cellular component organization or biogenesis (GO:0071840);; biological process: biological regulation (GO:0065007);; biological process: biological adhesion (GO:0022610);; biological process: cellular process…
ENSG00000197238	HIST1H4J	7.23381	103	10.2623	147	7.5078	100	11.6754	170	6.90446	103	12.5572	210	0.0397327	0.757847	up	--	--	--	K11254|1.15664e-50|dse:Dsec_GM19606|K11254 histone H4 | (RefSeq) GM19606 gene product from transcript GM19606-RA	--	[B]	Chromatin structure and dynamics	Centromere kinetochore component CENP-T histone fold;; TATA box binding protein associated factor (TAF)	Histone H4 OS=Homo sapiens OX=9606 GN=HIST1H4A PE=1 SV=2	B	Chromatin structure and dynamics	PREDICTED: histone H4-like [Chlorocebus sabaeus]	--
ENSG00000164104	HMGB2	166.819	8143	226.98	11266	159.177	7300	282.573	14072	171.328	8695	274.162	15630	0.000265761	0.74724	up	--	--	--	K11295|1.02871e-113|oas:101120892|K11295 high mobility group protein B2 | (RefSeq) HMGB2; high mobility group box 2	--	[R]	General function prediction only	HMG-box domain;; HMG (high mobility group) box	High mobility group protein B2 OS=Homo sapiens OX=9606 GN=HMGB2 PE=1 SV=2	B	Chromatin structure and dynamics	PREDICTED: high mobility group protein B2 [Callithrix jacchus]	--
ENSG00000188375	H3F3C	0.551743	23	1.14325	47	0.620667	24	1.12164	47	0.394438	17	1.29076	62	0.0111734	1.24172	up	--	--	Biological Process: chromatin silencing at rDNA (GO:0000183);; Cellular Component: nuclear chromosome, telomeric region (GO:0000784);; Cellular Component: nuclear nucleosome (GO:0000788);; Molecular Function: RNA polymerase II core promoter sequence-specific DNA binding (GO:0000979);; Molecular Function: RNA polymerase II distal enhancer sequence-specific DNA binding (GO:0000980);; Biological Pro…	K11253|2.83431e-93|lve:103081391|K11253 histone H3 | (RefSeq) histone H3.3-like	Alcoholism (ko05034);; Transcriptional misregulation in cancer (ko05202);; Systemic lupus erythematosus (ko05322)	[B]	Chromatin structure and dynamics	Core histone H2A/H2B/H3/H4	Histone H3.3C OS=Homo sapiens OX=9606 GN=H3F3C PE=1 SV=3	B	Chromatin structure and dynamics	histone H3.3C [Homo sapiens]	molecular function: catalytic activity (GO:0003824);; molecular function: binding (GO:0005488);; biological process: biological regulation (GO:0065007);; biological process: biological adhesion (GO:0022610);; biological process: multi-organism process (GO:0051704);; biological process: response to stimulus (GO:0050896);; biological process: metabolic process (GO:0008152);; biological process: cel…
ENSG00000203852	HIST2H3A	2.79883	176	4.95611	315	1.6607	98	2.87839	186	1.36652	91	3.20745	238	0.0153994	0.985288	up	--	--	Biological Process: negative regulation of transcription from RNA polymerase II promoter (GO:0000122);; Biological Process: chromatin silencing at rDNA (GO:0000183);; Cellular Component: nuclear chromosome, telomeric region (GO:0000784);; Cellular Component: nuclear nucleosome (GO:0000788);; Biological Process: positive regulation of defense response to virus by host (GO:0002230);; Cellular Compo…	K11253|1.52386e-90|nle:100593725|K11253 histone H3 | (RefSeq) histone H3-like	Alcoholism (ko05034);; Transcriptional misregulation in cancer (ko05202);; Systemic lupus erythematosus (ko05322)	[B]	Chromatin structure and dynamics	Core histone H2A/H2B/H3/H4	Histone H3.2 OS=Homo sapiens OX=9606 GN=HIST2H3A PE=1 SV=3	B	Chromatin structure and dynamics	PREDICTED: uncharacterized protein LOC704845 [Macaca mulatta]	molecular function: binding (GO:0005488);; biological process: biological adhesion (GO:0022610);; biological process: biological regulation (GO:0065007);; biological process: cellular process (GO:0009987);; biological process: metabolic process (GO:0008152);; biological process: single-organism process (GO:0044699);; biological process: multicellular organismal process (GO:0032501);; biological p…
ENSG00000153487	ING1	1.82958	222	2.6904	343	2.26839	200	3.36465	330	1.91229	255	2.84043	406	0.0295199	0.657495	up	--	--	Cellular Component: nucleoplasm (GO:0005654);; Cellular Component: cytoplasm (GO:0005737);; Biological Process: protein import into nucleus (GO:0006606);; Biological Process: cell cycle (GO:0007049);; Molecular Function: zinc ion binding (GO:0008270);; Biological Process: negative regulation of cell proliferation (GO:0008285);; Biological Process: regulation of cell death (GO:0010941);; Biologica…	K19197|4.02139e-155|ptr:736462|K19197 inhibitor of growth protein 1 | (RefSeq) ING1; inhibitor of growth family member 1	--	[B]	Chromatin structure and dynamics	Inhibitor of growth proteins N-terminal histone-binding	Inhibitor of growth protein 1 OS=Homo sapiens OX=9606 GN=ING1 PE=1 SV=2	B	Chromatin structure and dynamics	inhibitor of growth protein 1 isoform A [Homo sapiens]	cellular component: cell part (GO:0044464);; cellular component: organelle (GO:0043226);; cellular component: cell (GO:0005623);; cellular component: organelle part (GO:0044422);; biological process: cellular process (GO:0009987);; biological process: biological regulation (GO:0065007);; biological process: localization (GO:0051179);; biological process: single-organism process (GO:0044699);; mol…
ENSG00000184678	HIST2H2BE	7.30795	607	10.131	852	3.44858	269	6.70554	572	4.43772	389	7.30241	717	0.0213261	0.742045	up	--	--	Cellular Component: nuclear chromosome, telomeric region (GO:0000784);; Cellular Component: nuclear nucleosome (GO:0000788);; Biological Process: innate immune response in mucosa (GO:0002227);; Molecular Function: DNA binding (GO:0003677);; Cellular Component: extracellular space (GO:0005615);; Cellular Component: nucleoplasm (GO:0005654);; Cellular Component: cytoplasm (GO:0005737);; Biological …	K11252|4.04688e-55|cge:100761268|K11252 histone H2B | (RefSeq) histone H2B type 1	Alcoholism (ko05034);; Viral carcinogenesis (ko05203);; Systemic lupus erythematosus (ko05322)	[B]	Chromatin structure and dynamics	Core histone H2A/H2B/H3/H4;; Histone-like transcription factor (CBF/NF-Y) and archaeal histone	Histone H2B type 2-E OS=Homo sapiens OX=9606 GN=HIST2H2BE PE=1 SV=3	B	Chromatin structure and dynamics	PREDICTED: histone H2B type 2-F isoform X2 [Rhinopithecus roxellana]	cellular component: macromolecular complex (GO:0032991);; cellular component: membrane-enclosed lumen (GO:0031974);; cellular component: extracellular region part (GO:0044421);; cellular component: cell (GO:0005623);; cellular component: organelle part (GO:0044422);; cellular component: membrane part (GO:0044425);; cellular component: cell part (GO:0044464);; cellular component: membrane (GO:0016…
ENSG00000273542	HIST1H4K	7.46972	89	12.6732	152	8.56537	95	13.9995	170	9.66141	121	13.5936	190	0.0458455	0.736577	up	--	--	--	K11254|7.94727e-51|dse:Dsec_GM19606|K11254 histone H4 | (RefSeq) GM19606 gene product from transcript GM19606-RA	--	[B]	Chromatin structure and dynamics	Centromere kinetochore component CENP-T histone fold;; TATA box binding protein associated factor (TAF);; Histone-like transcription factor (CBF/NF-Y) and archaeal histone	Histone H4 OS=Homo sapiens OX=9606 GN=HIST1H4A PE=1 SV=2	B	Chromatin structure and dynamics	PREDICTED: LOW QUALITY PROTEIN: histone H4 [Cercocebus atys]	--
ENSG00000274267	HIST1H3B	5.0875	80	6.29603	100	1.24084	19	5.89428	95	0.805259	14	4.49132	83	0.0392104	1.263	up	--	--	--	K11253|1.35124e-93|umr:103665101|K11253 histone H3 | (RefSeq) histone H3.1	Alcoholism (ko05034);; Transcriptional misregulation in cancer (ko05202);; Systemic lupus erythematosus (ko05322)	[B]	Chromatin structure and dynamics	Core histone H2A/H2B/H3/H4	Histone H3.1 OS=Homo sapiens OX=9606 GN=HIST1H3A PE=1 SV=2	B	Chromatin structure and dynamics	PREDICTED: histone H3.1-like [Chlorocebus sabaeus]	--
ENSG00000184897	H1FX	96.9794	5529	112.957	6524	119.918	6410	170.379	9977	100.244	6023	179.618	12111	0.00811631	0.64063	up	--	--	Cellular Component: nucleosome (GO:0000786);; Molecular Function: DNA binding (GO:0003677);; Cellular Component: nucleolus (GO:0005730);; Biological Process: nucleosome assembly (GO:0006334);; Molecular Function: RNA binding (GO:0044822);;	K11275|2.60487e-71|mcf:102131764|K11275 histone H1/5 | (RefSeq) histone H1x-like	--	[B]	Chromatin structure and dynamics	linker histone H1 and H5 family	Histone H1x OS=Homo sapiens OX=9606 GN=H1FX PE=1 SV=1	B	Chromatin structure and dynamics	H1 histone family, member X [Macaca mulatta]	molecular function: binding (GO:0005488);; biological process: cellular component organization or biogenesis (GO:0071840);; biological process: cellular process (GO:0009987);; cellular component: cell part (GO:0044464);; cellular component: organelle (GO:0043226);; cellular component: macromolecular complex (GO:0032991);; cellular component: cell (GO:0005623);; cellular component: organelle part …
ENSG00000164736	SOX17	3.29273	292	5.73389	515	3.47696	289	7.38405	672	3.34052	312	6.36906	668	0.0002249	1.03892	up	--	--	--	K04495|0|hsa:64321|K04495 transcription factor SOX17 (SOX group F) | (RefSeq) SOX17, VUR3; SRY-box 17	Wnt signaling pathway (ko04310)	[K]	Transcription	HMG (high mobility group) box;; Sox 17/18 central domain;; HMG-box domain	Transcription factor SOX-17 OS=Homo sapiens OX=9606 GN=SOX17 PE=1 SV=1	B	Chromatin structure and dynamics	transcription factor SOX-17 [Homo sapiens]	--
ENSG00000138778	CENPE	5.56986	1760	7.86046	2294	5.71819	1429	14.2615	3545	5.96477	1884	10.3299	3727	0.000123227	0.904373	up	--	--	Cellular Component: condensed chromosome outer kinetochore (GO:0000940);; Molecular Function: microtubule motor activity (GO:0003777);; Molecular Function: ATP binding (GO:0005524);; Cellular Component: nucleus (GO:0005634);; Cellular Component: cytosol (GO:0005829);; Cellular Component: kinesin complex (GO:0005871);; Cellular Component: microtubule (GO:0005874);; Biological Process: retrograde v…	K11498|0|hsa:1062|K11498 centromeric protein E | (RefSeq) CENPE, CENP-E, KIF10, MCPH13, PPP1R61; centromere protein E	--	--	--	Kinesin motor domain;; Microtubule binding	Centromere-associated protein E OS=Homo sapiens OX=9606 GN=CENPE PE=1 SV=2	Z	Cytoskeleton	centromere-associated protein E isoform 1 precursor [Homo sapiens]	cellular component: macromolecular complex (GO:0032991);; cellular component: membrane (GO:0016020);; cellular component: organelle (GO:0043226);; cellular component: cell part (GO:0044464);; cellular component: supramolecular complex (GO:0099080);; cellular component: organelle part (GO:0044422);; cellular component: cell (GO:0005623);; biological process: localization (GO:0051179);; biological …
ENSG00000139354	GAS2L3	3.72165	377	5.37958	595	2.67428	259	6.59221	701	2.82273	349	4.95932	554	0.0016685	0.909306	up	--	--	--	--	--	--	--	--	GAS2-like protein 3 OS=Homo sapiens OX=9606 GN=GAS2L3 PE=1 SV=1	Z	Cytoskeleton	GAS2-like protein 3 isoform a [Homo sapiens]	--
ENSG00000188229	TUBB4B	405.277	25096	528.134	33130	330.027	19161	626.465	39847	310.614	20270	588.06	43069	0.000133133	0.824164	up	--	--	Biological Process: G2/M transition of mitotic cell cycle (GO:0000086);; Biological Process: neuron migration (GO:0001764);; Molecular Function: double-stranded RNA binding (GO:0003725);; Molecular Function: GTPase activity (GO:0003924);; Molecular Function: structural constituent of cytoskeleton (GO:0005200);; Molecular Function: GTP binding (GO:0005525);; Cellular Component: nuclear envelope lu…	K07375|0|xtr:779904|K07375 tubulin beta | (RefSeq) tubb4b, tubb2, tubb2c, tubb4; tubulin beta 4B class IVb	Phagosome (ko04145);; Gap junction (ko04540)	[Z]	Cytoskeleton	Tubulin/FtsZ family, GTPase domain;; Tubulin C-terminal domain	Tubulin beta-4B chain OS=Homo sapiens OX=9606 GN=TUBB4B PE=1 SV=1	Z	Cytoskeleton	tubulin beta-4B chain [Homo sapiens]	molecular function: catalytic activity (GO:0003824);; molecular function: binding (GO:0005488);; molecular function: structural molecule activity (GO:0005198);; biological process: cell killing (GO:0001906);; biological process: localization (GO:0051179);; biological process: response to stimulus (GO:0050896);; biological process: cellular process (GO:0009987);; biological process: locomotion (GO…
ENSG00000112984	KIF20A	39.9871	4803	55.2215	6660	28.8767	3222	62.5024	7662	33.0594	4171	59.2148	8299	5.16502e-05	0.877266	up	--	--	--	K10402|0|hsa:10112|K10402 kinesin family member 20 | (RefSeq) KIF20A, MKLP2, RAB6KIFL; kinesin family member 20A	--	[Z]	Cytoskeleton	Kinesin motor domain;; Microtubule binding	Kinesin-like protein KIF20A OS=Homo sapiens OX=9606 GN=KIF20A PE=1 SV=1	Z	Cytoskeleton	kinesin-like protein KIF20A [Homo sapiens]	--
ENSG00000176014	TUBB6	46.5439	2181	36.8346	2285	38.651	2139	83.923	5708	29.5604	1917	28.2496	2080	0.0492624	0.703063	up	--	--	Molecular Function: GTPase activity (GO:0003924);; Molecular Function: structural constituent of cytoskeleton (GO:0005200);; Molecular Function: protein binding (GO:0005515);; Molecular Function: GTP binding (GO:0005525);; Cellular Component: nucleus (GO:0005634);; Cellular Component: cytoplasm (GO:0005737);; Cellular Component: microtubule (GO:0005874);; Biological Process: microtubule-based pro…	K07375|0|ptr:455508|K07375 tubulin beta | (RefSeq) TUBB6, TUBB, TUBB-5; tubulin beta 6 class V	Phagosome (ko04145);; Gap junction (ko04540)	[Z]	Cytoskeleton	Tubulin/FtsZ family, GTPase domain;; Tubulin C-terminal domain	Tubulin beta-6 chain OS=Homo sapiens OX=9606 GN=TUBB6 PE=1 SV=1	Z	Cytoskeleton	tubulin beta-6 chain isoform 1 [Homo sapiens]	biological process: cellular process (GO:0009987);; biological process: locomotion (GO:0040011);; biological process: cellular component organization or biogenesis (GO:0071840);; biological process: response to stimulus (GO:0050896);; biological process: multicellular organismal process (GO:0032501);; biological process: single-organism process (GO:0044699);; biological process: developmental pro…
ENSG00000103018	CYB5B	16.4562	2543	29.4775	4843	20.7738	3090	22.9572	3852	11.0513	1300	23.3999	4489	0.00524294	0.867024	up	[CI]	Energy production and conversion;; Lipid transport and metabolism	Cellular Component: mitochondrial outer membrane (GO:0005741);; Cellular Component: mitochondrial inner membrane (GO:0005743);; Molecular Function: enzyme activator activity (GO:0008047);; Cellular Component: integral component of membrane (GO:0016021);; Molecular Function: heme binding (GO:0020037);; Biological Process: positive regulation of catalytic activity (GO:0043085);; Molecular Function:…	--	--	[C]	Energy production and conversion	Cytochrome b5-like Heme/Steroid binding domain	Cytochrome b5 type B OS=Homo sapiens OX=9606 GN=CYB5B PE=1 SV=2	CI	Energy production and conversion;; Lipid transport and metabolism	cytochrome b5 type B [Homo sapiens]	molecular function: binding (GO:0005488);; molecular function: molecular function regulator (GO:0098772);; biological process: biological regulation (GO:0065007);; biological process: metabolic process (GO:0008152);; biological process: single-organism process (GO:0044699);; cellular component: cell (GO:0005623);; cellular component: organelle part (GO:0044422);; cellular component: membrane part…
ENSG00000151079	KCNA6	0.225326	37	1.20505	196	0.314817	48	0.680206	112	0.164616	28	1.03827	197	3.87368e-06	2.10278	up	[T]	Signal transduction mechanisms	--	K04879|0|hsa:3742|K04879 potassium voltage-gated channel Shaker-related subfamily A member 6 | (RefSeq) KCNA6, HBK2, KV1.6, PPP1R96; potassium voltage-gated channel subfamily A member 6	--	[P]	Inorganic ion transport and metabolism	Ion transport protein;; BTB/POZ domain;; Ion channel	Potassium voltage-gated channel subfamily A member 6 OS=Homo sapiens OX=9606 GN=KCNA6 PE=2 SV=1	P	Inorganic ion transport and metabolism	potassium voltage-gated channel, shaker-related subfamily, member 6, partial [Homo sapiens]	--
ENSG00000137331	IER3	64.5894	3080	84.9037	4097	68.3604	3082	120.433	6039	72.3592	3895	114.719	6416	0.0015379	0.708416	up	--	--	--	--	--	--	--	--	Radiation-inducible immediate-early gene IEX-1 OS=Homo sapiens OX=9606 GN=IER3 PE=1 SV=4	U	Intracellular trafficking, secretion, and vesicular transport	radiation-inducible immediate-early gene IEX-1 [Homo sapiens]	--
ENSG00000137575	SDCBP	19.2307	1639	18.0863	1587	22.9691	1785	36.3613	3292	25.9618	2230	39.6404	3888	0.0298626	0.616311	up	--	--	--	K17254|0|rro:104680719|K17254 syntenin-1 | (RefSeq) SDCBP; syndecan binding protein	--	--	--	PDZ domain (Also known as DHR or GLGF);; PDZ domain	Syntenin-1 OS=Homo sapiens OX=9606 GN=SDCBP PE=1 SV=1	U	Intracellular trafficking, secretion, and vesicular transport	syntenin-1 isoform 4 [Homo sapiens]	--
ENSG00000162783	IER5	5.91676	938	12.7308	2044	12.8885	1915	24.0827	3919	11.8952	1986	25.3298	4747	0.000492965	1.12389	up	--	--	--	--	--	--	--	Immediate early response protein (IER)	Immediate early response gene 5 protein OS=Homo sapiens OX=9606 GN=IER5 PE=1 SV=3	U	Intracellular trafficking, secretion, and vesicular transport	hypothetical protein [Homo sapiens]	--
ENSG00000177283	FZD8	0.960509	147	3.44927	533	1.78692	256	5.21175	817	2.74924	442	5.3997	974	5.15394e-05	1.4684	up	--	--	Biological Process: negative regulation of transcription from RNA polymerase II promoter (GO:0000122);; Biological Process: embryonic axis specification (GO:0000578);; Biological Process: angiogenesis (GO:0001525);; Biological Process: positive regulation of cytokine production (GO:0001819);; Biological Process: regionalization (GO:0003002);; Molecular Function: G-protein coupled receptor activit…	K02375|0|hsa:8325|K02375 frizzled 5/8 | (RefSeq) FZD8, FZ-8, hFZ8; frizzled class receptor 8	mTOR signaling pathway (ko04150);; Wnt signaling pathway (ko04310);; Hippo signaling pathway (ko04390);; Signaling pathways regulating pluripotency of stem cells (ko04550);; Melanogenesis (ko04916);; HTLV-I infection (ko05166);; Pathways in cancer (ko05200);; Proteoglycans in cancer (ko05205);; Basal cell carcinoma (ko05217)	[T]	Signal transduction mechanisms	Frizzled/Smoothened family membrane region;; Fz domain	Frizzled-8 OS=Homo sapiens OX=9606 GN=FZD8 PE=1 SV=1	U	Intracellular trafficking, secretion, and vesicular transport	frizzled-8 precursor [Homo sapiens]	cellular component: cell (GO:0005623);; cellular component: membrane part (GO:0044425);; cellular component: macromolecular complex (GO:0032991);; cellular component: membrane (GO:0016020);; cellular component: organelle (GO:0043226);; cellular component: cell part (GO:0044464);; biological process: reproductive process (GO:0022414);; biological process: reproduction (GO:0000003);; biological pro…
ENSG00000125841	NRSN2	6.31772	380	13.658	852	7.47778	387	14.4237	1078	7.39135	466	6.82717	425	0.0060371	0.954824	up	--	--	--	--	--	--	--	Neurensin	Neurensin-2 OS=Homo sapiens OX=9606 GN=NRSN2 PE=2 SV=1	U	Intracellular trafficking, secretion, and vesicular transport	neurensin-2 isoform 1 [Homo sapiens]	--
ENSG00000139112	GABARAPL1	4.59161	315	3.62634	238	4.16259	244	5.74863	274	5.06621	275	13.6403	1246	0.0400724	0.99528	up	--	--	Biological Process: autophagosome assembly (GO:0000045);; Cellular Component: autophagosome membrane (GO:0000421);; Biological Process: autophagy of mitochondrion (GO:0000422);; Cellular Component: mitochondrion (GO:0005739);; Cellular Component: endoplasmic reticulum (GO:0005783);; Cellular Component: Golgi apparatus (GO:0005794);; Cellular Component: cytosol (GO:0005829);; Cellular Component: m…	K08341|7.6649e-52|fch:102047079|K08341 GABA(A) receptor-associated protein | (RefSeq) GABARAPL1; GABA type A receptor associated protein like 1	FoxO signaling pathway (ko04068);; Regulation of autophagy (ko04140)	[Z]	Cytoskeleton	Autophagy protein Atg8 ubiquitin like	Gamma-aminobutyric acid receptor-associated protein-like 1 OS=Homo sapiens OX=9606 GN=GABARAPL1 PE=1 SV=1	U	Intracellular trafficking, secretion, and vesicular transport	GABA(A) receptor-associated protein like 1, isoform CRA_e [Homo sapiens]	biological process: single-organism process (GO:0044699);; biological process: cellular component organization or biogenesis (GO:0071840);; biological process: response to stimulus (GO:0050896);; biological process: biological regulation (GO:0065007);; biological process: signaling (GO:0023052);; biological process: cellular process (GO:0009987);; biological process: metabolic process (GO:0008152…
ENSG00000172803	SNX32	0.215127	17	0.525467	41	0.239315	18	0.913187	72	0.330103	27	0.781764	71	0.00171595	1.56256	up	--	--	Molecular Function: protein binding (GO:0005515);; Cellular Component: endosome (GO:0005768);; Biological Process: endocytosis (GO:0006897);; Biological Process: protein transport (GO:0015031);; Biological Process: vesicle organization (GO:0016050);; Biological Process: regulation of macroautophagy (GO:0016241);; Cellular Component: extrinsic component of membrane (GO:0019898);; Molecular Functio…	K17920|0|ptr:744687|K17920 sorting nexin-5/6/32 | (RefSeq) SNX32, SNX6B; sorting nexin 32	Endocytosis (ko04144)	[V]	Defense mechanisms	PX domain;; Vps5 C terminal like	Sorting nexin-32 OS=Homo sapiens OX=9606 GN=SNX32 PE=1 SV=1	U	Intracellular trafficking, secretion, and vesicular transport	PREDICTED: sorting nexin-32 isoform X2 [Chlorocebus sabaeus]	molecular function: binding (GO:0005488);; biological process: localization (GO:0051179);; biological process: cellular component organization or biogenesis (GO:0071840);; biological process: biological regulation (GO:0065007);; biological process: cellular process (GO:0009987);; cellular component: cell (GO:0005623);; cellular component: organelle (GO:0043226);; cellular component: membrane (GO:…
ENSG00000170540	ARL6IP1	61.8787	5579	94.2334	8590	78.9214	6729	146.852	13651	89.3529	8524	127.786	13341	0.00135321	0.76764	up	--	--	Biological Process: positive regulation of L-glutamate transport (GO:0002038);; Molecular Function: protein binding (GO:0005515);; Cellular Component: Sec61 translocon complex (GO:0005784);; Cellular Component: cytosol (GO:0005829);; Biological Process: cotranslational protein targeting to membrane (GO:0006613);; Cellular Component: integral component of endoplasmic reticulum membrane (GO:0030176…	--	--	--	--	--	ADP-ribosylation factor-like protein 6-interacting protein 1 OS=Homo sapiens OX=9606 GN=ARL6IP1 PE=1 SV=2	U	Intracellular trafficking, secretion, and vesicular transport	PREDICTED: ADP-ribosylation factor-like protein 6-interacting protein 1 [Rhinopithecus roxellana]	biological process: single-organism process (GO:0044699);; biological process: cellular component organization or biogenesis (GO:0071840);; biological process: localization (GO:0051179);; biological process: biological regulation (GO:0065007);; biological process: cellular process (GO:0009987);; molecular function: binding (GO:0005488);; cellular component: membrane part (GO:0044425);; cellular c…
ENSG00000186891	TNFRSF18	0.386459	18	0.939496	39	0.304133	13	0.975535	45	0.328059	11	0.720551	39	0.0038763	1.5225	up	--	--	Biological Process: positive regulation of leukocyte migration (GO:0002687);; Molecular Function: tumor necrosis factor-activated receptor activity (GO:0005031);; Cellular Component: extracellular region (GO:0005576);; Cellular Component: integral component of plasma membrane (GO:0005887);; Biological Process: inflammatory response (GO:0006954);; Biological Process: immune response (GO:0006955);;…	K05154|7.50501e-90|hsa:8784|K05154 tumor necrosis factor receptor superfamily member 18 | (RefSeq) TNFRSF18, AITR, CD357, GITR, GITR-D; TNF receptor superfamily member 18	Cytokine-cytokine receptor interaction (ko04060)	--	--	--	Tumor necrosis factor receptor superfamily member 18 OS=Homo sapiens OX=9606 GN=TNFRSF18 PE=1 SV=1	U	Intracellular trafficking, secretion, and vesicular transport	tumor necrosis factor receptor superfamily member 18 isoform 1 precursor [Homo sapiens]	cellular component: membrane part (GO:0044425);; cellular component: membrane (GO:0016020);; cellular component: cell part (GO:0044464);; cellular component: cell (GO:0005623);; cellular component: extracellular region (GO:0005576);; biological process: response to stimulus (GO:0050896);; biological process: multi-organism process (GO:0051704);; biological process: signaling (GO:0023052);; biolog…
ENSG00000198719	DLL1	0.502857	61	0.961281	115	0.73291	83	1.35895	160	0.884659	112	1.33317	187	0.037397	0.843435	up	--	--	--	K06051|0|hsa:28514|K06051 delta | (RefSeq) DLL1, DELTA1, DL1, Delta; delta like canonical Notch ligand 1	Endocrine resistance (ko01522);; Notch signaling pathway (ko04330)	[T]	Signal transduction mechanisms	EGF-like domain;; N terminus of Notch ligand;; Delta serrate ligand;; Human growth factor-like EGF;; EGF-like domain	Delta-like protein 1 OS=Homo sapiens OX=9606 GN=DLL1 PE=1 SV=2	U	Intracellular trafficking, secretion, and vesicular transport	delta-like protein 1 precursor [Homo sapiens]	--
ENSG00000136099	PCDH8	0.155671	30	0.535424	105	0.25485	46	0.582255	116	0.186522	38	0.454468	104	0.000721512	1.48918	up	[U]	Intracellular trafficking, secretion, and vesicular transport	--	K16499|0|hsa:5100|K16499 protocadherin delta 2 | (RefSeq) PCDH8, ARCADLIN, PAPC; protocadherin 8	--	[S]	Function unknown	Cadherin domain;; Cadherin-like	Protocadherin-8 OS=Homo sapiens OX=9606 GN=PCDH8 PE=2 SV=2	U	Intracellular trafficking, secretion, and vesicular transport	protocadherin-8 isoform 1 precursor [Homo sapiens]	--
ENSG00000178343	SHISA3	0.637108	48	0.96113	73	0.293349	21	1.654	127	0.972451	77	1.77557	157	0.00899108	1.3076	up	--	--	Molecular Function: protein binding (GO:0005515);; Cellular Component: endoplasmic reticulum membrane (GO:0005789);; Biological Process: multicellular organism development (GO:0007275);; Cellular Component: integral component of membrane (GO:0016021);;	--	--	--	--	Wnt and FGF inhibitory regulator	Protein shisa-3 homolog OS=Homo sapiens OX=9606 GN=SHISA3 PE=1 SV=1	U	Intracellular trafficking, secretion, and vesicular transport	protein shisa-3 homolog precursor [Homo sapiens]	molecular function: binding (GO:0005488);; biological process: developmental process (GO:0032502);; biological process: single-organism process (GO:0044699);; biological process: multicellular organismal process (GO:0032501);; cellular component: organelle (GO:0043226);; cellular component: cell part (GO:0044464);; cellular component: membrane (GO:0016020);; cellular component: membrane part (GO:…
ENSG00000168476	REEP4	31.6086	2007	46.5869	2977	25.6918	1538	41.4576	2672	24.5047	1578	38.3914	2857	0.00146158	0.70979	up	--	--	--	K17338|1.7661e-177|hsa:80346|K17338 receptor expression-enhancing protein 1/2/3/4 | (RefSeq) REEP4, C8orf20, PP432, Yip2c; receptor accessory protein 4	--	[V]	Defense mechanisms	TB2/DP1, HVA22 family	Receptor expression-enhancing protein 4 OS=Homo sapiens OX=9606 GN=REEP4 PE=1 SV=1	U	Intracellular trafficking, secretion, and vesicular transport	receptor expression-enhancing protein 4 isoform 1 precursor [Homo sapiens]	--
ENSG00000111432	FZD10	0.072495	10	0.365226	46	0.360378	42	0.586417	75	0.366627	48	0.791723	117	0.0329218	1.22552	up	--	--	--	K02842|0|hsa:11211|K02842 frizzled 9/10 | (RefSeq) FZD10, CD350, FZ-10, Fz10, FzE7, hFz10; frizzled class receptor 10	mTOR signaling pathway (ko04150);; Wnt signaling pathway (ko04310);; Hippo signaling pathway (ko04390);; Signaling pathways regulating pluripotency of stem cells (ko04550);; Melanogenesis (ko04916);; HTLV-I infection (ko05166);; Pathways in cancer (ko05200);; Proteoglycans in cancer (ko05205);; Basal cell carcinoma (ko05217)	[T]	Signal transduction mechanisms	Frizzled/Smoothened family membrane region;; Fz domain	Frizzled-10 OS=Homo sapiens OX=9606 GN=FZD10 PE=1 SV=1	U	Intracellular trafficking, secretion, and vesicular transport	frizzled-10 precursor [Homo sapiens]	--
ENSG00000181649	PHLDA2	206.629	6086	232.356	6916	104.777	2887	170.585	5157	82.8041	2566	176.428	6135	0.0431526	0.622804	up	--	--	Biological Process: placenta development (GO:0001890);; Cellular Component: cytoplasm (GO:0005737);; Biological Process: apoptotic process (GO:0006915);; Biological Process: animal organ morphogenesis (GO:0009887);; Biological Process: regulation of gene expression (GO:0010468);; Cellular Component: membrane (GO:0016020);; Biological Process: regulation of cell migration (GO:0030334);; Biological…	--	--	--	--	--	Pleckstrin homology-like domain family A member 2 OS=Homo sapiens OX=9606 GN=PHLDA2 PE=1 SV=2	O	Posttranslational modification, protein turnover, chaperones	PREDICTED: pleckstrin homology-like domain family A member 2 isoform X2 [Cercocebus atys]	cellular component: cell (GO:0005623);; cellular component: membrane (GO:0016020);; cellular component: cell part (GO:0044464);; biological process: single-organism process (GO:0044699);; biological process: developmental process (GO:0032502);; biological process: multicellular organismal process (GO:0032501);; biological process: reproduction (GO:0000003);; biological process: reproductive proce…
ENSG00000162771	FAM71A	0.437667	39	0.8916	79	0.550153	45	1.28339	115	0.573611	53	1.27082	132	0.00408936	1.23263	up	--	--	--	--	--	--	--	Protein of unknown function (DUF3699)	Protein FAM71A OS=Homo sapiens OX=9606 GN=FAM71A PE=2 SV=2	O	Posttranslational modification, protein turnover, chaperones	protein FAM71A [Homo sapiens]	--
ENSG00000175063	UBE2C	197.955	6260	264.021	8051	143.795	4228	261.356	8470	134.83	4495	251.056	9317	0.000736631	0.76259	up	[O]	Posttranslational modification, protein turnover, chaperones	Molecular Function: ATP binding (GO:0005524);; Cellular Component: nucleoplasm (GO:0005654);; Cellular Component: anaphase-promoting complex (GO:0005680);; Cellular Component: cytosol (GO:0005829);; Biological Process: free ubiquitin chain polymerization (GO:0010994);; Biological Process: regulation of mitotic metaphase/anaphase transition (GO:0030071);; Biological Process: anaphase-promoting com…	K06688|2.3246e-102|ptr:736246|K06688 ubiquitin-conjugating enzyme E2 C [EC:2.3.2.23] | (RefSeq) ubiquitin-conjugating enzyme E2 C	Ubiquitin mediated proteolysis (ko04120)	[O]	Posttranslational modification, protein turnover, chaperones	Ubiquitin-conjugating enzyme	Ubiquitin-conjugating enzyme E2 C OS=Homo sapiens OX=9606 GN=UBE2C PE=1 SV=1	O	Posttranslational modification, protein turnover, chaperones	ubiquitin-conjugating enzyme E2 C isoform 1 [Homo sapiens]	cellular component: cell part (GO:0044464);; cellular component: organelle (GO:0043226);; cellular component: macromolecular complex (GO:0032991);; cellular component: organelle part (GO:0044422);; cellular component: cell (GO:0005623);; biological process: biological regulation (GO:0065007);; biological process: metabolic process (GO:0008152);; biological process: cellular process (GO:0009987);;…
ENSG00000204388	HSPA1B	22.36	2133	38.3326	3704	44.126	3946	71.9678	7050	57.6273	5792	71.9716	8118	0.0388065	0.669703	up	[O]	Posttranslational modification, protein turnover, chaperones	Cellular Component: ubiquitin ligase complex (GO:0000151);; Biological Process: telomere maintenance (GO:0000723);; Molecular Function: virus receptor activity (GO:0001618);; Molecular Function: G-protein coupled receptor binding (GO:0001664);; Cellular Component: zona pellucida receptor complex (GO:0002199);; Molecular Function: ATP binding (GO:0005524);; Cellular Component: nucleoplasm (GO:0005…	K03283|0|rro:104678130|K03283 heat shock 70kDa protein 1/8 | (RefSeq) heat shock 70 kDa protein 1	Spliceosome (ko03040);; MAPK signaling pathway (ko04010);; Protein processing in endoplasmic reticulum (ko04141);; Endocytosis (ko04144);; Longevity regulating pathway - multiple species (ko04213);; Antigen processing and presentation (ko04612);; Estrogen signaling pathway (ko04915);; Legionellosis (ko05134);; Toxoplasmosis (ko05145);; Measles (ko05162);; Influenza A (ko05164);; Epstein-Barr viru…	[O]	Posttranslational modification, protein turnover, chaperones	Hsp70 protein;; MreB/Mbl protein	Heat shock 70 kDa protein 1B OS=Homo sapiens OX=9606 GN=HSPA1B PE=1 SV=1	O	Posttranslational modification, protein turnover, chaperones	heat shock 70kDa protein 1A variant, partial [Homo sapiens]	cellular component: cell junction (GO:0030054);; cellular component: extracellular region (GO:0005576);; cellular component: cell part (GO:0044464);; cellular component: organelle (GO:0043226);; cellular component: extracellular region part (GO:0044421);; cellular component: organelle part (GO:0044422);; cellular component: cell (GO:0005623);; cellular component: macromolecular complex (GO:003299…
ENSG00000092140	G2E3	2.37799	241	1.914	411	1.75129	245	2.31114	453	1.88499	386	2.09605	495	0.0308051	0.642085	up	--	--	--	--	--	[K]	Transcription	PHD-like zinc-binding domain;; HECT-domain (ubiquitin-transferase);; PHD-zinc-finger like domain	G2/M phase-specific E3 ubiquitin-protein ligase OS=Homo sapiens OX=9606 GN=G2E3 PE=1 SV=1	O	Posttranslational modification, protein turnover, chaperones	G2/M phase-specific E3 ubiquitin-protein ligase isoform 1 [Homo sapiens]	--
Human_newGene_13609	--	1.66775	53	2.41354	76	0.118222	5	3.1145	100	0.098133	4	1.29832	53	0.0185817	1.86019	up	--	--	Biological Process: negative regulation of transcription from RNA polymerase II promoter (GO:0000122);; Biological Process: activation of MAPK activity (GO:0000187);; Biological Process: protein polyubiquitination (GO:0000209);; Molecular Function: protease binding (GO:0002020);; Biological Process: antigen processing and presentation of exogenous peptide antigen via MHC class I, TAP-dependent (G…	K04551|5.28432e-128|umr:103658519|K04551 ubiquitin B | (RefSeq) UBB; ubiquitin B	--	[OR]	Posttranslational modification, protein turnover, chaperones;; General function prediction only	Ubiquitin family;; Ubiquitin-2 like Rad60 SUMO-like;; Ubiquitin-like domain;; Ubiquitin family;; Ubiquitin-2 like Rad60 SUMO-like;; Ubiquitin-like domain	Polyubiquitin-C OS=Homo sapiens OX=9606 GN=UBC PE=1 SV=3	O	Posttranslational modification, protein turnover, chaperones	unnamed protein product [Homo sapiens]	biological process: multi-organism process (GO:0051704);; biological process: biological regulation (GO:0065007);; biological process: signaling (GO:0023052);; biological process: localization (GO:0051179);; biological process: response to stimulus (GO:0050896);; biological process: cellular process (GO:0009987);; biological process: metabolic process (GO:0008152);; biological process: single-org…
Human_newGene_13463	--	0.276367	60	0.55719	123	0.214251	44	0.826472	184	0.213844	49	0.940968	241	1.91335e-05	1.80928	up	--	--	Cellular Component: endoplasmic reticulum membrane (GO:0005789);; Biological Process: drug metabolic process (GO:0017144);; Biological Process: peptidyl-glutamic acid carboxylation (GO:0017187);; Biological Process: post-translational protein modification (GO:0043687);;	--	--	--	--	--	Zinc finger protein ENSP00000375192 OS=Homo sapiens OX=9606 PE=2 SV=1	O	Posttranslational modification, protein turnover, chaperones	hypothetical protein EGK_03078, partial [Macaca mulatta]	cellular component: membrane part (GO:0044425);; cellular component: cell part (GO:0044464);; cellular component: membrane (GO:0016020);; cellular component: organelle (GO:0043226);; cellular component: organelle part (GO:0044422);; cellular component: cell (GO:0005623);; biological process: metabolic process (GO:0008152);; biological process: cellular process (GO:0009987);;
ENSG00000099860	GADD45B	17.9244	889	31.9174	1545	18.8618	863	62.8259	2956	13.9193	692	55.9748	2684	1.10841e-07	1.52751	up	--	--	--	K04402|1.54718e-87|ptr:744311|K04402 growth arrest and DNA-damage-inducible protein | (RefSeq) GADD45B; growth arrest and DNA damage inducible beta	MAPK signaling pathway (ko04010);; FoxO signaling pathway (ko04068);; Cell cycle (ko04110);; p53 signaling pathway (ko04115);; Apoptosis (ko04210)	--	--	Ribosomal protein L7Ae/L30e/S12e/Gadd45 family	Growth arrest and DNA damage-inducible protein GADD45 beta OS=Homo sapiens OX=9606 GN=GADD45B PE=1 SV=1	O	Posttranslational modification, protein turnover, chaperones	growth arrest and DNA-damage-inducible, beta, isoform CRA_b, partial [Homo sapiens]	--
ENSG00000169429	CXCL8	5.1963	320	5.83874	375	8.26036	481	17.484	1118	9.06552	600	17.195	1264	0.0123299	0.963979	up	--	--	--	K10030|2.54106e-46|pon:100437111|K10030 interleukin 8 | (RefSeq) interleukin-8	Cytokine-cytokine receptor interaction (ko04060);; Chemokine signaling pathway (ko04062);; NF-kappa B signaling pathway (ko04064);; Phospholipase D signaling pathway (ko04072);; Toll-like receptor signaling pathway (ko04620);; NOD-like receptor signaling pathway (ko04621);; RIG-I-like receptor signaling pathway (ko04622);; Non-alcoholic fatty liver disease (NAFLD) (ko04932);; AGE-RAGE signaling p…	--	--	Small cytokines (intecrine/chemokine), interleukin-8 like	Interleukin-8 OS=Homo sapiens OX=9606 GN=CXCL8 PE=1 SV=1	O	Posttranslational modification, protein turnover, chaperones	LOW QUALITY PROTEIN: interleukin-8 [Pongo abelii]	--
ENSG00000163273	NPPC	2.01462	58	2.93109	101	2.91673	104	4.78062	191	2.47997	99	4.64331	215	0.0320437	0.932952	up	--	--	--	K12336|1.83324e-31|hsa:4880|K12336 natriuretic peptide C | (RefSeq) NPPC, CNP, CNP2; natriuretic peptide C	--	--	--	Atrial natriuretic peptide	C-type natriuretic peptide OS=Homo sapiens OX=9606 GN=NPPC PE=1 SV=1	O	Posttranslational modification, protein turnover, chaperones	C-type natriuretic peptide preproprotein [Homo sapiens]	--
ENSG00000157870	PRXL2B	3.52291	300	3.55976	362	3.96411	224	7.69817	814	3.63199	254	3.39353	299	0.0197417	0.941887	up	--	--	Biological Process: prostaglandin biosynthetic process (GO:0001516);; Cellular Component: endoplasmic reticulum (GO:0005783);; Cellular Component: cytosol (GO:0005829);; Cellular Component: myelin sheath (GO:0043209);; Molecular Function: prostaglandin-F synthase activity (GO:0047017);; Biological Process: oxidation-reduction process (GO:0055114);; Cellular Component: extracellular exosome (GO:00…	K15717|3.26652e-111|ptr:744202|K15717 prostamide/prostaglandin F2alpha synthase [EC:1.11.1.20] | (RefSeq) FAM213B; family with sequence similarity 213 member B	Arachidonic acid metabolism (ko00590)	[S]	Function unknown	AhpC/TSA antioxidant enzyme	Prostamide/prostaglandin F synthase OS=Homo sapiens OX=9606 GN=FAM213B PE=1 SV=1	O	Posttranslational modification, protein turnover, chaperones	PREDICTED: prostamide/prostaglandin F synthase isoform X1 [Pan troglodytes]	molecular function: catalytic activity (GO:0003824);; biological process: cellular process (GO:0009987);; biological process: metabolic process (GO:0008152);; biological process: single-organism process (GO:0044699);; cellular component: organelle (GO:0043226);; cellular component: cell part (GO:0044464);; cellular component: extracellular region part (GO:0044421);; cellular component: cell (GO:0…
Human_newGene_43656	--	0.35091	38	1.37456	151	0.418553	43	0.898346	100	0.462351	53	0.678049	87	0.00263156	1.3324	up	--	--	Molecular Function: nucleic acid binding (GO:0003676);; Molecular Function: exonuclease activity (GO:0004527);; Cellular Component: nucleus (GO:0005634);; Cellular Component: cytoplasm (GO:0005737);; Biological Process: nucleic acid phosphodiester bond hydrolysis (GO:0090305);;	K14570|0|hsa:100288562|K14570 RNA exonuclease 1 [EC:3.1.-.-] | (RefSeq) putative exonuclease GOR	Ribosome biogenesis in eukaryotes (ko03008)	[L]	Replication, recombination and repair	ElonginA binding-protein 1	Putative exonuclease GOR OS=Homo sapiens OX=9606 GN=REXO1L1P PE=5 SV=2	L	Replication, recombination and repair	PREDICTED: putative exonuclease GOR [Homo sapiens]	cellular component: cell (GO:0005623);; cellular component: cell part (GO:0044464);; cellular component: organelle (GO:0043226);; biological process: cellular process (GO:0009987);; biological process: metabolic process (GO:0008152);; molecular function: catalytic activity (GO:0003824);; molecular function: binding (GO:0005488);;
ENSG00000116717	GADD45A	45.606	2509	60.8611	3388	50.0481	2620	78.0834	4036	44.1984	2604	74.5842	4866	0.00271044	0.641393	up	--	--	Biological Process: regulation of cyclin-dependent protein serine/threonine kinase activity (GO:0000079);; Biological Process: G2/M transition of mitotic cell cycle (GO:0000086);; Biological Process: activation of MAPKKK activity (GO:0000185);; Molecular Function: core promoter binding (GO:0001047);; Molecular Function: protein binding (GO:0005515);; Cellular Component: nucleoplasm (GO:0005654);;…	K04402|3.0572e-112|rro:104657306|K04402 growth arrest and DNA-damage-inducible protein | (RefSeq) GADD45A; growth arrest and DNA damage inducible alpha	MAPK signaling pathway (ko04010);; FoxO signaling pathway (ko04068);; Cell cycle (ko04110);; p53 signaling pathway (ko04115);; Apoptosis (ko04210)	--	--	Ribosomal protein L7Ae/L30e/S12e/Gadd45 family	Growth arrest and DNA damage-inducible protein GADD45 alpha OS=Homo sapiens OX=9606 GN=GADD45A PE=1 SV=1	L	Replication, recombination and repair	growth arrest and DNA damage-inducible protein GADD45 alpha isoform 1 [Homo sapiens]	biological process: biological regulation (GO:0065007);; biological process: signaling (GO:0023052);; biological process: response to stimulus (GO:0050896);; biological process: metabolic process (GO:0008152);; biological process: cellular process (GO:0009987);; biological process: single-organism process (GO:0044699);; biological process: developmental process (GO:0032502);; biological process: …
ENSG00000140451	PIF1	9.35842	952	14.623	1506	7.75045	739	15.8082	1647	5.9702	618	15.6966	1883	2.56574e-05	1.09027	up	[L]	Replication, recombination and repair	--	K15255|0|hsa:80119|K15255 ATP-dependent DNA helicase PIF1 [EC:3.6.4.12] | (RefSeq) PIF1, C15orf20, PIF; PIF1 5'-to-3' DNA helicase	--	[D]	Cell cycle control, cell division, chromosome partitioning	PIF1-like helicase;; AAA domain;; AAA domain;; Helicase	ATP-dependent DNA helicase PIF1 OS=Homo sapiens OX=9606 GN=PIF1 PE=1 SV=2	L	Replication, recombination and repair	PREDICTED: ATP-dependent DNA helicase PIF1 isoform X1 [Pan troglodytes]	--
ENSG00000125657	TNFSF9	10.8583	684	13.0339	832	8.79305	520	14.4248	934	8.58864	571	14.4812	1079	0.00938802	0.657664	up	--	--	--	K05472|5.68629e-118|hsa:8744|K05472 tumor necrosis factor ligand superfamily member 9 | (RefSeq) TNFSF9, 4-1BB-L, CD137L, TNLG5A; tumor necrosis factor superfamily member 9	Cytokine-cytokine receptor interaction (ko04060)	--	--	TNF(Tumour Necrosis Factor) family	Tumor necrosis factor ligand superfamily member 9 OS=Homo sapiens OX=9606 GN=TNFSF9 PE=1 SV=1	A	RNA processing and modification	tumor necrosis factor ligand superfamily member 9 [Homo sapiens]	--
ENSG00000158050	DUSP2	10.2291	654	16.8288	1089	17.7951	1066	25.5941	1679	20.1614	1357	27.2443	2058	0.0284378	0.638258	up	[T]	Signal transduction mechanisms	Biological Process: inactivation of MAPK activity (GO:0000188);; Biological Process: endoderm formation (GO:0001706);; Molecular Function: protein tyrosine phosphatase activity (GO:0004725);; Cellular Component: nucleus (GO:0005634);; Molecular Function: protein tyrosine/threonine phosphatase activity (GO:0008330);; Molecular Function: MAP kinase tyrosine/serine/threonine phosphatase activity (GO…	K04459|0|mcc:718442|K04459 dual specificity MAP kinase phosphatase [EC:3.1.3.16 3.1.3.48] | (RefSeq) DUSP2; dual specificity phosphatase 2	MAPK signaling pathway (ko04010)	[V]	Defense mechanisms	Dual specificity phosphatase, catalytic domain;; Rhodanese-like domain;; Protein-tyrosine phosphatase	Dual specificity protein phosphatase 2 OS=Homo sapiens OX=9606 GN=DUSP2 PE=1 SV=1	T	Signal transduction mechanisms	PREDICTED: dual specificity protein phosphatase 2 [Pan troglodytes]	molecular function: catalytic activity (GO:0003824);; molecular function: binding (GO:0005488);; biological process: single-organism process (GO:0044699);; biological process: multicellular organismal process (GO:0032501);; biological process: developmental process (GO:0032502);; biological process: metabolic process (GO:0008152);; biological process: cellular process (GO:0009987);; biological pr…
ENSG00000118515	SGK1	12.4477	1146	24.8142	2292	16.58	1423	42.5899	4009	23.4838	2254	31.3375	3388	0.000199594	1.02099	up	[T]	Signal transduction mechanisms	--	K13302|0|pps:100984960|K13302 serum/glucocorticoid-regulated kinase 1 [EC:2.7.11.1] | (RefSeq) SGK1; serum/glucocorticoid regulated kinase 1	FoxO signaling pathway (ko04068);; mTOR signaling pathway (ko04150);; PI3K-Akt signaling pathway (ko04151);; Aldosterone-regulated sodium reabsorption (ko04960)	[RT]	General function prediction only;; Signal transduction mechanisms	Protein kinase domain;; Protein tyrosine kinase;; Kinase-like;; Protein kinase C terminal domain;; PX domain	Serine/threonine-protein kinase Sgk1 OS=Homo sapiens OX=9606 GN=SGK1 PE=1 SV=2	T	Signal transduction mechanisms	serine/threonine-protein kinase Sgk1 isoform 2 [Homo sapiens]	--
ENSG00000140992	PDPK1	2.73161	382	5.42387	1257	3.50596	665	4.44896	1124	3.59303	526	5.51286	1243	2.14713e-05	1.17415	up	[M]	Cell wall/membrane/envelope biogenesis	--	K06276|0|hsa:5170|K06276 3-phosphoinositide dependent protein kinase-1 [EC:2.7.11.1] | (RefSeq) PDPK1, PDK1, PDPK2, PDPK2P, PRO0461; 3-phosphoinositide dependent protein kinase 1	Platinum drug resistance (ko01524);; PPAR signaling pathway (ko03320);; FoxO signaling pathway (ko04068);; Sphingolipid signaling pathway (ko04071);; mTOR signaling pathway (ko04150);; PI3K-Akt signaling pathway (ko04151);; AMPK signaling pathway (ko04152);; Apoptosis (ko04210);; Focal adhesion (ko04510);; T cell receptor signaling pathway (ko04660);; Fc epsilon RI signaling pathway (ko04664);; N…	[T]	Signal transduction mechanisms	Protein kinase domain;; PH domain;; Protein tyrosine kinase;; Kinase-like	3-phosphoinositide-dependent protein kinase 1 OS=Homo sapiens OX=9606 GN=PDPK1 PE=1 SV=1	T	Signal transduction mechanisms	3-phosphoinositide-dependent protein kinase 1 isoform 1 [Homo sapiens]	--
ENSG00000117650	NEK2	23.3836	1819	27.1992	2152	13.4602	961	23.9584	1901	17.3448	1409	25.6826	2319	0.018417	0.590547	up	[R]	General function prediction only	--	K20872|0|pps:100977113|K20872 NIMA (never in mitosis gene a)-related kinase 2 [EC:2.7.11.1] | (RefSeq) NEK2; NIMA related kinase 2	--	[V]	Defense mechanisms	Protein kinase domain;; Protein tyrosine kinase	Serine/threonine-protein kinase Nek2 OS=Homo sapiens OX=9606 GN=NEK2 PE=1 SV=1	T	Signal transduction mechanisms	serine/threonine-protein kinase Nek2 isoform 1 [Homo sapiens]	--
ENSG00000167657	DAPK3	16.4546	881	26.5185	1693	11.0786	543	12.4257	803	11.8383	700	13.2437	1011	0.0202771	0.709177	up	[T]	Signal transduction mechanisms	--	K08803|0|ptr:455594|K08803 death-associated protein kinase [EC:2.7.11.1] | (RefSeq) DAPK3; death associated protein kinase 3	Pathways in cancer (ko05200);; Bladder cancer (ko05219)	[T]	Signal transduction mechanisms	Protein kinase domain;; Protein tyrosine kinase;; Lipopolysaccharide kinase (Kdo/WaaP) family;; RIO1 family	Death-associated protein kinase 3 OS=Homo sapiens OX=9606 GN=DAPK3 PE=1 SV=1	T	Signal transduction mechanisms	death-associated protein kinase 3 isoform X1 [Aotus nancymaae]	--
ENSG00000145632	PLK2	15.2166	1702	29.3832	3333	21.7636	2285	39.65	4561	24.027	2836	34.2327	4534	0.000268554	0.860295	up	[T]	Signal transduction mechanisms	Cellular Component: chromatin (GO:0000785);; Molecular Function: protein serine/threonine kinase activity (GO:0004674);; Molecular Function: signal transducer activity (GO:0004871);; Molecular Function: ATP binding (GO:0005524);; Cellular Component: centriole (GO:0005814);; Cellular Component: cytosol (GO:0005829);; Biological Process: DNA damage response, signal transduction by p53 class mediato…	K08861|0|pps:100968426|K08861 polo-like kinase 2 [EC:2.7.11.21] | (RefSeq) PLK2; polo like kinase 2	FoxO signaling pathway (ko04068)	[D]	Cell cycle control, cell division, chromosome partitioning	Protein kinase domain;; Protein tyrosine kinase;; POLO box duplicated region	Serine/threonine-protein kinase PLK2 OS=Homo sapiens OX=9606 GN=PLK2 PE=1 SV=3	T	Signal transduction mechanisms	serine/threonine-protein kinase PLK2 isoform 1 [Homo sapiens]	molecular function: binding (GO:0005488);; molecular function: signal transducer activity (GO:0004871);; molecular function: catalytic activity (GO:0003824);; biological process: signaling (GO:0023052);; biological process: biological regulation (GO:0065007);; biological process: behavior (GO:0007610);; biological process: response to stimulus (GO:0050896);; biological process: cellular process (…
ENSG00000169627	BOLA2B	30.8156	1124	51.4813	1887	30.3561	1040	28.3232	1050	27.5519	1059	48.0457	2093	0.020526	0.602685	up	[T]	Signal transduction mechanisms	--	--	--	[T]	Signal transduction mechanisms	BolA-like protein;; GIY-YIG catalytic domain	BolA-like protein 2 OS=Homo sapiens OX=9606 GN=BOLA2 PE=1 SV=1	T	Signal transduction mechanisms	bolA-like protein 2 isoform 1 [Homo sapiens]	--
ENSG00000123358	NR4A1	15.1045	1106	27.2163	1921	27.1592	1914	43.6255	3174	28.2887	2030	36.2904	3112	0.0129792	0.688608	up	--	--	--	K04465|0|pps:100976569|K04465 nuclear receptor subfamily 4 group A member 1 | (RefSeq) NR4A1; nuclear receptor subfamily 4 group A member 1	MAPK signaling pathway (ko04010);; PI3K-Akt signaling pathway (ko04151);; Aldosterone synthesis and secretion (ko04925)	[K]	Transcription	Ligand-binding domain of nuclear hormone receptor;; Zinc finger, C4 type (two domains)	Nuclear receptor subfamily 4 group A member 1 OS=Homo sapiens OX=9606 GN=NR4A1 PE=1 SV=1	K	Transcription	nuclear receptor subfamily 4 group A member 1 isoform 3 [Homo sapiens]	--
ENSG00000163132	MSX1	1.5952	117	2.30776	172	2.12128	146	3.88202	293	2.80844	218	4.06092	353	0.0436317	0.760774	up	--	--	--	K09341|1.47477e-135|ptr:461092|K09341 homeobox protein MSX | (RefSeq) MSX1; msh homeobox 1	HTLV-I infection (ko05166)	[R]	General function prediction only	Homeobox domain	Homeobox protein MSX-1 OS=Homo sapiens OX=9606 GN=MSX1 PE=1 SV=3	K	Transcription	homeobox protein MSX-1 [Homo sapiens]	--
ENSG00000182759	MAFA	1.47754	132	2.19197	198	1.77831	149	3.16836	289	1.49444	140	3.24	341	0.00755691	0.946506	up	--	--	Molecular Function: RNA polymerase II core promoter proximal region sequence-specific DNA binding (GO:0000978);; Molecular Function: transcriptional activator activity, RNA polymerase II core promoter proximal region sequence-specific binding (GO:0001077);; Biological Process: antigen processing and presentation of peptide antigen via MHC class I (GO:0002474);; Molecular Function: receptor activi…	K07595|9.85862e-89|hsa:389692|K07595 transcription factor MAFA | (RefSeq) MAFA, RIPE3b1, hMafA; MAF bZIP transcription factor A	Type II diabetes mellitus (ko04930);; Maturity onset diabetes of the young (ko04950)	--	--	bZIP Maf transcription factor;; Maf N-terminal region	Transcription factor MafA OS=Homo sapiens OX=9606 GN=MAFA PE=1 SV=2	K	Transcription	transcription factor MafA [Homo sapiens]	molecular function: binding (GO:0005488);; molecular function: nucleic acid binding transcription factor activity (GO:0001071);; molecular function: molecular transducer activity (GO:0060089);; biological process: response to stimulus (GO:0050896);; biological process: localization (GO:0051179);; biological process: signaling (GO:0023052);; biological process: biological regulation (GO:0065007);;…
ENSG00000157514	TSC22D3	4.80949	331	5.60026	393	2.67526	181	4.74043	344	2.95566	228	6.09036	478	0.0355237	0.689036	up	--	--	--	--	--	[K]	Transcription	TSC-22/dip/bun family	TSC22 domain family protein 3 OS=Homo sapiens OX=9606 GN=TSC22D3 PE=1 SV=2	K	Transcription	PREDICTED: TSC22 domain family protein 3 isoform X1 [Chlorocebus sabaeus]	--
ENSG00000171223	JUNB	181.335	12484	279.998	19528	189.191	12212	388.624	27482	176.365	12796	394.865	32153	2.14022e-06	1.05351	up	--	--	--	K09028|9.09879e-167|pps:100982854|K09028 transcription factor jun-B | (RefSeq) JUNB; JunB proto-oncogene, AP-1 transcription factor subunit	Osteoclast differentiation (ko04380);; TNF signaling pathway (ko04668)	[K]	Transcription	Jun-like transcription factor;; bZIP transcription factor;; Basic region leucine zipper;; bZIP Maf transcription factor	Transcription factor jun-B OS=Homo sapiens OX=9606 GN=JUNB PE=1 SV=1	K	Transcription	Jun B proto-oncogene [Homo sapiens]	--
ENSG00000141582	CBX4	11.7044	1180	22.2583	2200	13.2582	1202	28.4441	2817	15.6521	1650	26.7279	3090	9.54526e-06	1.00144	up	--	--	Biological Process: negative regulation of transcription from RNA polymerase II promoter (GO:0000122);; Molecular Function: chromatin binding (GO:0003682);; Molecular Function: transcription corepressor activity (GO:0003714);; Molecular Function: single-stranded RNA binding (GO:0003727);; Cellular Component: nuclear speck (GO:0016607);; Molecular Function: ligase activity (GO:0016874);; Biologica…	K11452|0|ptr:744720|K11452 chromobox protein 4 | (RefSeq) CBX4; chromobox 4	--	[B]	Chromatin structure and dynamics	Chromo (CHRromatin Organisation MOdifier) domain;; CBX family C-terminal motif	E3 SUMO-protein ligase CBX4 OS=Homo sapiens OX=9606 GN=CBX4 PE=1 SV=3	K	Transcription	E3 SUMO-protein ligase CBX4 [Homo sapiens]	cellular component: cell part (GO:0044464);; cellular component: organelle (GO:0043226);; cellular component: macromolecular complex (GO:0032991);; cellular component: organelle part (GO:0044422);; cellular component: cell (GO:0005623);; cellular component: membrane-enclosed lumen (GO:0031974);; biological process: biological regulation (GO:0065007);; biological process: cellular process (GO:0009…
ENSG00000170345	FOS	14.8777	1103	46.9281	2759	22.3536	1246	97.9584	5207	19.7311	1284	64.6252	4874	8.82662e-12	1.80559	up	--	--	Molecular Function: RNA polymerase II core promoter proximal region sequence-specific DNA binding (GO:0000978);; Molecular Function: RNA polymerase II core promoter sequence-specific DNA binding (GO:0000979);; Molecular Function: transcriptional activator activity, RNA polymerase II core promoter proximal region sequence-specific binding (GO:0001077);; Biological Process: conditioned taste aversi…	K04379|0|hsa:2353|K04379 proto-oncogene protein c-fos | (RefSeq) FOS, AP-1, C-FOS, p55; Fos proto-oncogene, AP-1 transcription factor subunit	Endocrine resistance (ko01522);; MAPK signaling pathway (ko04010);; cAMP signaling pathway (ko04024);; Apoptosis (ko04210);; Osteoclast differentiation (ko04380);; Toll-like receptor signaling pathway (ko04620);; T cell receptor signaling pathway (ko04660);; B cell receptor signaling pathway (ko04662);; TNF signaling pathway (ko04668);; Circadian entrainment (ko04713);; Cholinergic synapse (ko047…	[K]	Transcription	bZIP transcription factor;; Basic region leucine zipper;; bZIP Maf transcription factor	Proto-oncogene c-Fos OS=Homo sapiens OX=9606 GN=FOS PE=1 SV=1	K	Transcription	proto-oncogene c-Fos [Homo sapiens]	molecular function: binding (GO:0005488);; molecular function: nucleic acid binding transcription factor activity (GO:0001071);; biological process: response to stimulus (GO:0050896);; biological process: behavior (GO:0007610);; biological process: biological regulation (GO:0065007);; biological process: signaling (GO:0023052);; biological process: multi-organism process (GO:0051704);; biological…
ENSG00000125740	FOSB	4.86696	533	8.7233	1067	2.78226	271	9.05465	1034	3.08008	368	8.43783	1130	4.09028e-07	1.44759	up	--	--	--	K09029|3.78054e-136|pps:100989480|K09029 protein FosB | (RefSeq) FOSB; FosB proto-oncogene, AP-1 transcription factor subunit	Osteoclast differentiation (ko04380);; Cocaine addiction (ko05030);; Amphetamine addiction (ko05031);; Alcoholism (ko05034)	[K]	Transcription	bZIP transcription factor;; Basic region leucine zipper;; bZIP Maf transcription factor	Protein fosB OS=Homo sapiens OX=9606 GN=FOSB PE=1 SV=1	K	Transcription	protein fosB isoform 1 [Homo sapiens]	--
ENSG00000164442	CITED2	16.3952	1460	27.031	2438	18.0551	1508	46.9606	4295	18.2202	1710	42.2206	4447	7.51704e-07	1.24122	up	--	--	--	--	--	--	--	CITED	Cbp/p300-interacting transactivator 2 OS=Homo sapiens OX=9606 GN=CITED2 PE=1 SV=2	K	Transcription	PREDICTED: cbp/p300-interacting transactivator 2 [Callithrix jacchus]	--
ENSG00000114315	HES1	3.67645	220	9.22462	558	6.34558	356	12.7862	784	7.51114	473	13.6659	965	0.000380303	1.12847	up	--	--	--	K06054|8.97585e-152|rro:104669884|K06054 hairy and enhancer of split 1 | (RefSeq) HES1; hes family bHLH transcription factor 1	Fanconi anemia pathway (ko03460);; Notch signaling pathway (ko04330);; Maturity onset diabetes of the young (ko04950)	[K]	Transcription	Hairy Orange;; Helix-loop-helix DNA-binding domain	Transcription factor HES-1 OS=Homo sapiens OX=9606 GN=HES1 PE=1 SV=1	K	Transcription	transcription factor HES-1 [Homo sapiens]	--
ENSG00000119508	NR4A3	2.96351	428	4.03805	639	4.667	665	11.4222	1801	4.25858	683	11.1967	1979	0.000367626	1.29297	up	--	--	--	K08559|0|ocu:100344785|K08559 nuclear receptor subfamily 4 group A member 3 | (RefSeq) NR4A3; nuclear receptor subfamily 4 group A member 3	Transcriptional misregulation in cancer (ko05202)	[K]	Transcription	Zinc finger, C4 type (two domains);; Ligand-binding domain of nuclear hormone receptor	Nuclear receptor subfamily 4 group A member 3 OS=Homo sapiens OX=9606 GN=NR4A3 PE=1 SV=3	K	Transcription	PREDICTED: nuclear receptor subfamily 4 group A member 3 isoform X1 [Cebus capucinus imitator]	--
ENSG00000186834	HEXIM1	45.1851	6154	77.4381	10683	58.3471	7450	120.66	16878	60.5765	8694	112.444	18111	1.75658e-05	1.02097	up	--	--	Biological Process: negative regulation of transcription from RNA polymerase II promoter (GO:0000122);; Molecular Function: cyclin-dependent protein serine/threonine kinase inhibitor activity (GO:0004861);; Molecular Function: protein binding (GO:0005515);; Cellular Component: nucleoplasm (GO:0005654);; Cellular Component: cytoplasm (GO:0005737);; Biological Process: heart development (GO:0007507…	K15189|1.60258e-159|nle:100601526|K15189 protein HEXIM1/2 | (RefSeq) HEXIM1; hexamethylene bisacetamide inducible 1	--	--	--	Hexamethylene bis-acetamide-inducible protein	Protein HEXIM1 OS=Homo sapiens OX=9606 GN=HEXIM1 PE=1 SV=1	K	Transcription	PREDICTED: protein HEXIM1 [Nomascus leucogenys]	cellular component: cell (GO:0005623);; cellular component: organelle part (GO:0044422);; cellular component: cell part (GO:0044464);; cellular component: organelle (GO:0043226);; molecular function: binding (GO:0005488);; molecular function: molecular function regulator (GO:0098772);; biological process: biological regulation (GO:0065007);; biological process: single-organism process (GO:0044699…
ENSG00000143333	RGS16	0.940841	87	2.33619	218	1.08101	94	2.36346	223	1.17155	114	2.11327	230	0.000976619	1.17575	up	--	--	--	K16449|2.52464e-123|cjc:100404849|K16449 regulator of G-protein signaling | (RefSeq) RGS16; regulator of G-protein signaling 16	--	[T]	Signal transduction mechanisms	Regulator of G protein signaling domain	Regulator of G-protein signaling 16 OS=Homo sapiens OX=9606 GN=RGS16 PE=1 SV=2	K	Transcription	PREDICTED: regulator of G-protein signaling 16 isoform X1 [Callithrix jacchus]	--
ENSG00000177606	JUN	37.8594	5070	81.4853	11054	41.9256	5264	111.759	15372	42.043	5933	110.039	17428	2.34371e-10	1.41201	up	--	--	Molecular Function: RNA polymerase II core promoter proximal region sequence-specific DNA binding (GO:0000978);; Molecular Function: RNA polymerase II distal enhancer sequence-specific DNA binding (GO:0000980);; Molecular Function: transcriptional activator activity, RNA polymerase II core promoter proximal region sequence-specific binding (GO:0001077);; Molecular Function: RNA polymerase II acti…	K04448|1.54428e-161|ptr:456893|K04448 transcription factor AP-1 | (RefSeq) JUN; Jun proto-oncogene, AP-1 transcription factor subunit	Endocrine resistance (ko01522);; MAPK signaling pathway (ko04010);; ErbB signaling pathway (ko04012);; cAMP signaling pathway (ko04024);; Apoptosis (ko04210);; Wnt signaling pathway (ko04310);; Osteoclast differentiation (ko04380);; Focal adhesion (ko04510);; Toll-like receptor signaling pathway (ko04620);; T cell receptor signaling pathway (ko04660);; B cell receptor signaling pathway (ko04662);…	[K]	Transcription	Jun-like transcription factor;; bZIP transcription factor;; Basic region leucine zipper;; bZIP Maf transcription factor	Transcription factor AP-1 OS=Homo sapiens OX=9606 GN=JUN PE=1 SV=2	K	Transcription	JUN [Homo sapiens]	cellular component: cell (GO:0005623);; cellular component: organelle part (GO:0044422);; cellular component: membrane-enclosed lumen (GO:0031974);; cellular component: organelle (GO:0043226);; cellular component: cell part (GO:0044464);; cellular component: macromolecular complex (GO:0032991);; biological process: multi-organism process (GO:0051704);; biological process: rhythmic process (GO:004…
ENSG00000204103	MAFB	0.160557	21	0.261497	35	0.21374	26	0.54746	73	0.17744	25	0.405835	62	0.0155366	1.22161	up	--	--	Biological Process: negative regulation of transcription from RNA polymerase II promoter (GO:0000122);; Molecular Function: RNA polymerase II core promoter proximal region sequence-specific DNA binding (GO:0000978);; Molecular Function: transcriptional activator activity, RNA polymerase II core promoter proximal region sequence-specific binding (GO:0001077);; Biological Process: cytokine producti…	K09036|9.02612e-152|rro:104671242|K09036 transcription factor MAFB | (RefSeq) MAFB; MAF bZIP transcription factor B	--	[K]	Transcription	bZIP Maf transcription factor;; Maf N-terminal region	Transcription factor MafB OS=Homo sapiens OX=9606 GN=MAFB PE=1 SV=2	K	Transcription	PREDICTED: transcription factor MafB [Rhinopithecus roxellana]	cellular component: cell (GO:0005623);; cellular component: macromolecular complex (GO:0032991);; cellular component: organelle (GO:0043226);; cellular component: cell part (GO:0044464);; molecular function: binding (GO:0005488);; molecular function: nucleic acid binding transcription factor activity (GO:0001071);; biological process: immune system process (GO:0002376);; biological process: devel…
Human_newGene_37012	--	0.396314	68	1.50459	158	0.231629	37	0.648236	114	0.316482	57	0.706714	127	0.00240456	1.29098	up	--	--	Biological Process: nuclear-transcribed mRNA catabolic process, nonsense-mediated decay (GO:0000184);; Molecular Function: RNA binding (GO:0003723);; Molecular Function: structural constituent of ribosome (GO:0003735);; Molecular Function: protein binding (GO:0005515);; Biological Process: translational initiation (GO:0006413);; Biological Process: translational elongation (GO:0006414);; Biologic…	K02873|2.70355e-65|ecb:100050173|K02873 large subunit ribosomal protein L13e | (RefSeq) RPL13; ribosomal protein L13	Ribosome (ko03010)	--	--	Ribosomal protein L13e	60S ribosomal protein L13 OS=Homo sapiens OX=9606 GN=RPL13 PE=1 SV=4	J	Translation, ribosomal structure and biogenesis	60S ribosomal protein L13 [Carlito syrichta]	cellular component: organelle part (GO:0044422);; cellular component: cell (GO:0005623);; cellular component: macromolecular complex (GO:0032991);; cellular component: organelle (GO:0043226);; cellular component: cell part (GO:0044464);; biological process: localization (GO:0051179);; biological process: single-organism process (GO:0044699);; biological process: cellular component organization or…
Human_newGene_35376	--	0.162348	18	0.632515	71	0.038665	5	0.742007	85	0.398419	47	0.689317	90	0.00149576	1.86239	up	--	--	Biological Process: nuclear-transcribed mRNA catabolic process, nonsense-mediated decay (GO:0000184);; Molecular Function: DNA binding (GO:0003677);; Molecular Function: mRNA binding (GO:0003729);; Molecular Function: structural constituent of ribosome (GO:0003735);; Biological Process: rRNA processing (GO:0006364);; Biological Process: translational initiation (GO:0006413);; Biological Process: …	K02937|1.54849e-79|ptg:102961001|K02937 large subunit ribosomal protein L7e | (RefSeq) RPL7; ribosomal protein L7	Ribosome (ko03010)	[J]	Translation, ribosomal structure and biogenesis	--	60S ribosomal protein L7 OS=Homo sapiens OX=9606 GN=RPL7 PE=1 SV=1	J	Translation, ribosomal structure and biogenesis	PREDICTED: 60S ribosomal protein L7-like isoform X1 [Gorilla gorilla gorilla]	cellular component: macromolecular complex (GO:0032991);; cellular component: cell part (GO:0044464);; cellular component: organelle (GO:0043226);; cellular component: cell (GO:0005623);; cellular component: organelle part (GO:0044422);; biological process: localization (GO:0051179);; biological process: single-organism process (GO:0044699);; biological process: cellular component organization or…

## Sheet: BMK 24h DMSO vs 24h LY2606368
#ID	gene_name	T04_FPKM	T04_count	T07_FPKM	T07_count	T10_FPKM	T10_count	T13_FPKM	T13_count	T16_FPKM	T16_count	T19_FPKM	T19_count	Pvalue	log2FC	regulated	COG_class	COG_class_annotation	GO_annotation	KEGG_annotation	KEGG_pathway_annotation	KOG_class	KOG_class_annotation	Pfam_annotation	Swiss_Prot_annotation	eggNOG_class	eggNOG_class_annotation	NR_annotation	GO_second_level_annotation
Human_newGene_17082	--	1.2707	92	0.843335	56	1.72886	151	0.212433	27	1.36162	134	0.21615	24	0.00530895	-1.4535	down	--	--	--	K04460|1.32893e-09|ptr:100610545|K04460 serine/threonine-protein phosphatase 5 [EC:3.1.3.16] | (RefSeq) PPP5D1; PPP5 tetratricopeptide repeat domain containing 1	MAPK signaling pathway (ko04010)	--	--	--	Protein PPP5D1 OS=Homo sapiens OX=9606 GN=PPP5D1 PE=2 SV=2	--	--	hypothetical protein EGK_04398, partial [Macaca mulatta]	--
Human_newGene_26321	--	0.441983	138	0.296606	88	1.12887	369	0.356234	123	1.41524	423	0.295307	112	0.00389234	-1.18726	down	--	--	--	--	--	--	--	--	Putative uncharacterized protein FLJ38264 OS=Homo sapiens OX=9606 PE=5 SV=1	--	--	PREDICTED: MAPK-interacting and spindle-stabilizing protein-like, partial [Homo sapiens]	--
Human_newGene_20163	--	0.21756	56	0.105001	26	0.594906	172	0.147866	42	0.394481	107	0.156855	49	0.0137539	-1.19575	down	--	--	--	--	--	--	--	--	Putative uncharacterized protein C8orf44 OS=Homo sapiens OX=9606 GN=C8orf44 PE=2 SV=2	--	--	PREDICTED: MAPK-interacting and spindle-stabilizing protein-like, partial [Homo sapiens]	--
Human_newGene_4534	--	1.15253	95	0.896012	70	3.60933	272	2.39395	110	3.22496	267	0.74576	73	0.0246	-0.985097	down	--	--	--	--	--	--	--	--	--	--	--	--	--
Human_newGene_40525	--	0.42295	43	0.30636	30	0.875169	100	0.182894	21	0.608531	66	0.247973	31	0.0479541	-1.00948	down	--	--	--	--	--	--	--	--	--	--	--	--	--
Human_newGene_22943	--	0.625113	32	0.288999	12	0.963464	47	0.131032	6	1.34574	66	0.118756	7	0.000250326	-2.18508	down	--	--	--	--	--	--	--	--	--	--	--	hCG1655607 [Homo sapiens]	--
Human_newGene_25823	--	1.07906	286	0.502658	113	2.65852	779	0.878663	231	2.21621	491	0.942922	228	0.00247987	-1.1416	down	--	--	--	--	--	--	--	--	Putative uncharacterized protein encoded by LINC00205 OS=Homo sapiens OX=9606 GN=LINC00205 PE=5 SV=1	--	--	PREDICTED: LOW QUALITY PROTEIN: uncharacterized protein LOC108539766 [Rhinopithecus bieti]	--
Human_newGene_44616	--	0.180219	36	0.122012	23	0.301864	69	0.100529	22	0.431857	92	0.098492	24	0.0225126	-1.17911	down	--	--	--	--	--	--	--	--	--	--	--	hypothetical protein EGM_13849 [Macaca fascicularis]	--
Human_newGene_21173	--	1.11098	60	0.666314	37	2.25425	146	0.634939	43	2.89118	152	0.542595	45	0.0109362	-1.18214	down	--	--	--	--	--	--	--	--	--	--	--	PREDICTED: uncharacterized protein LOC103247567 [Chlorocebus sabaeus]	--
Human_newGene_8675	--	0.834725	52	0.226292	9	1.86406	118	0.541773	36	1.35686	80	0.743805	48	0.0347371	-1.16455	down	--	--	--	--	--	--	--	--	--	--	--	hCG1813033, isoform CRA_b [Homo sapiens]	--
Human_newGene_43073	--	0.159173	66	0.134344	51	0.462031	228	0.036657	20	0.763679	271	0.125425	68	0.00370321	-1.63513	down	--	--	--	--	--	--	--	--	--	--	--	uncharacterized protein LOC103886823 isoform X2 [Papio anubis]	--
Human_newGene_26093	--	0.222591	58	0.093836	24	0.280765	83	0.099996	29	0.735011	204	0.156892	50	0.00828404	-1.43546	down	--	--	--	--	--	--	--	--	EEF1A lysine methyltransferase 2 OS=Homo sapiens OX=9606 GN=EEF1AKMT2 PE=1 SV=2	--	--	unnamed portein product [Macaca fascicularis]	--
Human_newGene_33326	--	0.414126	34	0.705658	19	0.478044	43	0.119516	11	0.58441	50	0.082391	9	0.0166301	-1.37221	down	--	--	--	--	--	--	--	--	--	--	--	--	--
Human_newGene_26472	--	2.64272	230	0.569641	57	2.17512	262	1.18018	174	2.65479	324	2.31037	162	0.0493158	-0.831434	down	--	--	--	--	--	--	--	--	--	--	--	PREDICTED: uncharacterized protein LOC100580223 [Nomascus leucogenys]	--
Human_newGene_15578	--	0.633575	120	1.30431	65	0.912514	186	0.621654	80	1.06637	185	0.312928	78	0.0373508	-0.845232	down	--	--	--	--	--	--	--	--	--	--	--	--	--
ENSG00000275034	TP53TG3E	1.03704	58	0	0	1.3691	86	0	0	1.29869	78	0	0	1.32176e-17	-9.07805	down	--	--	--	--	--	--	--	--	TP53-target gene 3 protein OS=Homo sapiens OX=9606 GN=TP53TG3 PE=2 SV=1	--	--	TP53-target gene 3 protein [Homo sapiens]	--
Human_newGene_38758	--	0.39077	38	0.096304	9	0.692655	77	0.138949	15	0.344273	36	0.136752	16	0.00291043	-1.62738	down	--	--	--	--	--	--	--	--	--	--	--	--	--
Human_newGene_18407	--	1.10187	94	0.305502	25	0.871363	84	0.345228	33	1.21718	110	0.331656	34	0.00323383	-1.40072	down	--	--	--	--	--	--	--	--	--	--	--	--	--
Human_newGene_6451	--	0.706868	39	0.173664	15	0.485647	43	0.169254	16	1.33335	56	0.476919	16	0.0155256	-1.27103	down	--	--	--	--	--	--	--	--	--	--	--	hCG2019553, partial [Homo sapiens]	--
Human_newGene_28898	--	0.255044	50	0.295437	55	0.885952	196	0.260079	56	0.994923	207	0.245331	58	0.0353506	-1.04549	down	--	--	--	--	--	--	--	--	--	--	--	PREDICTED: uncharacterized protein LOC105600926 [Cercocebus atys]	--
ENSG00000105889	STEAP1B	4.83502	204	3.4139	142	6.01541	321	2.51517	123	6.63541	321	1.9394	111	0.0266547	-0.847878	down	--	--	--	K14737|2.46187e-166|ggo:101151089|K14737 metalloreductase STEAP1 [EC:1.16.1.-] | (RefSeq) STEAP1B; STEAP family member 1B	Mineral absorption (ko04978)	--	--	Ferric reductase like transmembrane component	Metalloreductase STEAP1 OS=Homo sapiens OX=9606 GN=STEAP1 PE=2 SV=1	--	--	STEAP family member 1B isoform 1 [Homo sapiens]	--
Human_newGene_20265	--	4.10814	224	3.08724	162	6.11261	378	2.96438	178	7.30967	424	2.54227	168	0.0468829	-0.699677	down	--	--	--	--	--	--	--	--	--	--	--	--	--
Human_newGene_39212	--	0.38666	94	0.154545	36	0.362136	100	0.090497	25	0.472247	122	0.188295	55	0.0153925	-1.17432	down	--	--	--	--	--	--	--	--	Putative uncharacterized protein encoded by LINC00269 OS=Homo sapiens OX=9606 GN=LINC00269 PE=5 SV=1	--	--	hypothetical protein EGM_14979, partial [Macaca fascicularis]	--
Human_newGene_35237	--	0.26908	32	0.10644	12	0.75263	102	0.278452	37	0.446796	57	0.111264	16	0.0301957	-1.24198	down	--	--	--	--	--	--	--	--	--	--	--	--	--
Human_newGene_34847	--	0.452787	37	0.156415	12	0.397446	36	0.198867	18	0.586119	45	0.08045	8	0.0148227	-1.36573	down	--	--	--	--	--	--	--	--	Embryonic stem cell-related gene protein OS=Homo sapiens OX=9606 GN=ESRG PE=2 SV=2	--	--	RecName: Full=Embryonic stem cell-related gene protein; Short=hES cell-related gene protein	--
Human_newGene_17092	--	3.6702	352	2.7241	258	3.23029	541	1.60018	156	3.60939	528	2.18072	194	0.0158636	-0.889927	down	--	--	Biological Process: fibroblast growth factor receptor signaling pathway (GO:0008543);; Biological Process: regulation of neural precursor cell proliferation (GO:2000177);;	--	--	--	--	--	SHC SH2 domain-binding protein 1 OS=Homo sapiens OX=9606 GN=SHCBP1 PE=1 SV=3	--	--	unnamed protein product [Homo sapiens]	biological process: response to stimulus (GO:0050896);; biological process: single-organism process (GO:0044699);; biological process: cellular process (GO:0009987);; biological process: signaling (GO:0023052);; biological process: biological regulation (GO:0065007);;
Human_newGene_23563	--	0.589827	63	0.299554	30	2.68857	308	1.25774	107	2.98392	304	0.522738	64	0.00952137	-1.41521	down	--	--	Biological Process: negative regulation of transcription from RNA polymerase II promoter (GO:0000122);; Cellular Component: nuclear chromosome (GO:0000228);; Molecular Function: transcription factor activity, protein binding (GO:0000988);; Molecular Function: core promoter binding (GO:0001047);; Molecular Function: transcriptional activator activity, RNA polymerase II core promoter proximal regio…	--	--	--	--	--	Putative uncharacterized protein encoded by LINC00596 OS=Homo sapiens OX=9606 GN=LINC00596 PE=5 SV=1	--	--	hypothetical protein EGK_02111, partial [Macaca mulatta]	biological process: cellular process (GO:0009987);; biological process: metabolic process (GO:0008152);; biological process: reproductive process (GO:0022414);; biological process: multicellular organismal process (GO:0032501);; biological process: developmental process (GO:0032502);; biological process: single-organism process (GO:0044699);; biological process: cellular component organization or…
Human_newGene_16189	--	0.324486	75	0.063467	13	0.299151	90	0.073635	21	0.341762	93	0.097452	32	0.000579323	-1.71748	down	--	--	Cellular Component: endoplasmic reticulum membrane (GO:0005789);; Cellular Component: integral component of membrane (GO:0016021);; Biological Process: drug metabolic process (GO:0017144);; Biological Process: peptidyl-glutamic acid carboxylation (GO:0017187);; Biological Process: post-translational protein modification (GO:0043687);; Molecular Function: vitamin-K-epoxide reductase (warfarin-sens…	--	--	--	--	--	Putative uncharacterized protein encoded by LINC00269 OS=Homo sapiens OX=9606 GN=LINC00269 PE=5 SV=1	--	--	hCG1660224, isoform CRA_b [Homo sapiens]	molecular function: catalytic activity (GO:0003824);; biological process: single-organism process (GO:0044699);; biological process: metabolic process (GO:0008152);; biological process: cellular process (GO:0009987);; cellular component: cell (GO:0005623);; cellular component: organelle part (GO:0044422);; cellular component: membrane part (GO:0044425);; cellular component: cell part (GO:0044464)…
Human_newGene_26704	--	0.28109	30	0.020007	2	0.957708	114	0	0	1.03929	116	0.365264	47	0.034575	-2.11045	down	--	--	Cellular Component: endoplasmic reticulum membrane (GO:0005789);; Cellular Component: integral component of membrane (GO:0016021);; Biological Process: drug metabolic process (GO:0017144);; Biological Process: peptidyl-glutamic acid carboxylation (GO:0017187);; Biological Process: post-translational protein modification (GO:0043687);; Molecular Function: vitamin-K-epoxide reductase (warfarin-sens…	--	--	--	--	--	Putative uncharacterized protein encoded by LINC00269 OS=Homo sapiens OX=9606 GN=LINC00269 PE=5 SV=1	--	--	PREDICTED: LOW QUALITY PROTEIN: uncharacterized protein LOC105487202 [Macaca nemestrina]	biological process: cellular process (GO:0009987);; biological process: metabolic process (GO:0008152);; biological process: single-organism process (GO:0044699);; molecular function: catalytic activity (GO:0003824);; cellular component: membrane part (GO:0044425);; cellular component: cell part (GO:0044464);; cellular component: membrane (GO:0016020);; cellular component: organelle (GO:0043226);…
Human_newGene_33896	--	0.426605	43	0.282971	27	0.988388	113	0.360477	40	0.847664	91	0.274151	34	0.0459124	-0.963757	down	--	--	Cellular Component: endoplasmic reticulum membrane (GO:0005789);; Cellular Component: integral component of membrane (GO:0016021);; Biological Process: drug metabolic process (GO:0017144);; Biological Process: peptidyl-glutamic acid carboxylation (GO:0017187);; Biological Process: post-translational protein modification (GO:0043687);; Molecular Function: vitamin-K-epoxide reductase (warfarin-sens…	--	--	--	--	--	Zinc finger protein ENSP00000375192 OS=Homo sapiens OX=9606 PE=2 SV=1	--	--	hypothetical protein EGM_12441, partial [Macaca fascicularis]	cellular component: organelle part (GO:0044422);; cellular component: cell (GO:0005623);; cellular component: membrane part (GO:0044425);; cellular component: cell part (GO:0044464);; cellular component: organelle (GO:0043226);; cellular component: membrane (GO:0016020);; biological process: cellular process (GO:0009987);; biological process: metabolic process (GO:0008152);; biological process: s…
Human_newGene_40700	--	0.286173	109	0.121742	45	0.432904	188	0.108945	46	0.623664	253	0.204438	95	0.00628889	-1.2631	down	--	--	Molecular Function: catalytic activity (GO:0003824);;	--	--	--	--	Protein of unknown function (DUF1725)	LINE-1 retrotransposable element ORF2 protein OS=Homo sapiens OX=9606 PE=1 SV=1	--	--	unknown protein, partial [Homo sapiens]	molecular function: catalytic activity (GO:0003824);;
Human_newGene_22818	--	1.52341	106	0.274313	40	1.23911	140	0.630547	42	1.06597	145	0.836103	48	0.00295802	-1.30363	down	--	--	Molecular Function: DNA binding (GO:0003677);; Cellular Component: nucleus (GO:0005634);; Biological Process: regulation of transcription, DNA-templated (GO:0006355);; Molecular Function: metal ion binding (GO:0046872);;	--	--	--	--	--	Putative uncharacterized protein encoded by LINC00471 OS=Homo sapiens OX=9606 GN=LINC00471 PE=5 SV=1	--	--	uncharacterized protein LOC103876592 isoform X1 [Papio anubis]	molecular function: binding (GO:0005488);; biological process: biological regulation (GO:0065007);; cellular component: organelle (GO:0043226);; cellular component: cell part (GO:0044464);; cellular component: cell (GO:0005623);;
Human_newGene_42511	--	0.151671	38	0.049891	12	0.517063	133	0.162691	45	0.643153	173	0.164696	50	0.0175841	-1.37482	down	--	--	Molecular Function: DNA binding (GO:0003677);; Cellular Component: nucleus (GO:0005634);; Biological Process: regulation of transcription, DNA-templated (GO:0006355);; Molecular Function: metal ion binding (GO:0046872);;	--	--	--	--	--	UPF0764 protein C16orf89 OS=Homo sapiens OX=9606 GN=C16orf89 PE=1 SV=2	--	--	unnamed protein product [Homo sapiens]	cellular component: cell (GO:0005623);; cellular component: cell part (GO:0044464);; cellular component: organelle (GO:0043226);; biological process: biological regulation (GO:0065007);; molecular function: binding (GO:0005488);;
Human_newGene_47816	--	0.906496	38	0.411191	17	1.42407	67	0.304718	14	1.07377	47	0.56594	29	0.0485092	-1.04525	down	--	--	Molecular Function: nucleic acid binding (GO:0003676);; Cellular Component: intracellular (GO:0005622);; Biological Process: transcription, DNA-templated (GO:0006351);;	--	--	--	--	--	Putative uncharacterized protein encoded by LINC00269 OS=Homo sapiens OX=9606 GN=LINC00269 PE=5 SV=1	--	--	hCG2014340 [Homo sapiens]	molecular function: binding (GO:0005488);; biological process: cellular process (GO:0009987);; biological process: metabolic process (GO:0008152);; cellular component: cell part (GO:0044464);; cellular component: cell (GO:0005623);;
Human_newGene_10781	--	1.26447	52	1.09447	43	1.51077	106	0.904205	30	2.26786	116	0.778209	37	0.0469678	-0.966588	down	--	--	Molecular Function: protein binding (GO:0005515);; Cellular Component: Golgi apparatus (GO:0005794);; Cellular Component: trans-Golgi network (GO:0005802);; Biological Process: post-Golgi vesicle-mediated transport (GO:0006892);; Biological Process: protein transport (GO:0015031);; Cellular Component: integral component of membrane (GO:0016021);; Cellular Component: recycling endosome membrane (G…	--	--	--	--	--	--	--	--	hCG1780097 [Homo sapiens]	molecular function: binding (GO:0005488);; biological process: localization (GO:0051179);; cellular component: cell (GO:0005623);; cellular component: organelle part (GO:0044422);; cellular component: membrane part (GO:0044425);; cellular component: cell part (GO:0044464);; cellular component: membrane (GO:0016020);; cellular component: organelle (GO:0043226);;
Human_newGene_10008	--	1.22678	263	0.794133	169	1.86645	465	0.6418	185	2.05371	472	0.986346	200	0.0179681	-0.803966	down	--	--	Molecular Function: protein binding (GO:0005515);; Cellular Component: nucleolus (GO:0005730);; Cellular Component: plasma membrane (GO:0005886);; Cellular Component: cytoplasmic vesicle (GO:0031410);;	--	--	--	--	--	UPF0764 protein C16orf89 OS=Homo sapiens OX=9606 GN=C16orf89 PE=1 SV=2	--	--	hypothetical protein EGM_09449, partial [Macaca fascicularis]	cellular component: cell (GO:0005623);; cellular component: organelle part (GO:0044422);; cellular component: membrane (GO:0016020);; cellular component: organelle (GO:0043226);; cellular component: cell part (GO:0044464);; molecular function: binding (GO:0005488);;
ENSG00000111371	SLC38A1	2.5742	583	2.08005	493	4.61632	1124	1.66572	455	3.83405	1018	1.56829	424	0.0291065	-0.656408	down	--	--	--	K14990|0|pps:100974272|K14990 solute carrier family 38 (sodium-coupled neutral amino acid transporter), member 1 | (RefSeq) SLC38A1; solute carrier family 38 member 1	Glutamatergic synapse (ko04724);; GABAergic synapse (ko04727)	[E]	Amino acid transport and metabolism	Transmembrane amino acid transporter protein	Sodium-coupled neutral amino acid transporter 1 OS=Homo sapiens OX=9606 GN=SLC38A1 PE=1 SV=1	E	Amino acid transport and metabolism	unnamed protein product [Homo sapiens]	--
ENSG00000258984	UBE2F-SCLY	2.87773	296	0.417871	42	0.537104	56	0.108634	5	0.608587	67	0.228922	30	0.00619647	-2.30229	down	[E]	Amino acid transport and metabolism	--	K01763|0|hsa:51540|K01763 selenocysteine lyase [EC:4.4.1.16] | (RefSeq) SCLY, SCL, hSCL; selenocysteine lyase	Selenocompound metabolism (ko00450)	[E]	Amino acid transport and metabolism	Aminotransferase class-V	Selenocysteine lyase OS=Homo sapiens OX=9606 GN=SCLY PE=1 SV=4	E	Amino acid transport and metabolism	RecName: Full=Selenocysteine lyase; Short=hSCL	--
ENSG00000168679	SLC16A4	0.78919	68	0.335267	29	0.522607	52	0.116416	13	0.424821	39	0.053665	7	0.0297921	-1.40948	down	[P]	Inorganic ion transport and metabolism	--	K08181|0|hsa:9122|K08181 MFS transporter, MCP family, solute carrier family 16 (monocarboxylic acid transporters), member 4 | (RefSeq) SLC16A4, MCT4, MCT5; solute carrier family 16 member 4	--	[G]	Carbohydrate transport and metabolism	Major Facilitator Superfamily	Monocarboxylate transporter 5 OS=Homo sapiens OX=9606 GN=SLC16A4 PE=2 SV=1	E	Amino acid transport and metabolism	monocarboxylate transporter 5 isoform 1 [Homo sapiens]	--
ENSG00000196312	MFSD14C	2.11449	512	2.15445	403	3.82408	1014	1.61042	358	4.03369	983	1.19291	329	0.00594803	-0.861311	down	--	--	--	--	--	--	--	Protein of unknown function (DUF1725)	Hippocampus abundant transcript-like protein 2 OS=Homo sapiens OX=9606 GN=MFSD14C PE=2 SV=1	G	Carbohydrate transport and metabolism	hippocampus abundant transcript-like protein 2 isoform 3 [Homo sapiens]	--
ENSG00000165434	PGM2L1	1.30107	395	0.950558	274	1.88408	649	0.846825	284	2.09384	676	0.886837	326	0.03583	-0.653458	down	[G]	Carbohydrate transport and metabolism	--	K11809|0|hsa:283209|K11809 glucose-1,6-bisphosphate synthase [EC:2.7.1.106] | (RefSeq) PGM2L1, BM32A, PMMLP; phosphoglucomutase 2 like 1	Starch and sucrose metabolism (ko00500)	[G]	Carbohydrate transport and metabolism	Phosphoglucomutase/phosphomannomutase, alpha/beta/alpha domain I;; Phosphoglucomutase/phosphomannomutase, alpha/beta/alpha domain II;; Phosphoglucomutase/phosphomannomutase, alpha/beta/alpha domain III;; Phosphoglucomutase/phosphomannomutase, C-terminal domain	Glucose 1,6-bisphosphate synthase OS=Homo sapiens OX=9606 GN=PGM2L1 PE=1 SV=3	G	Carbohydrate transport and metabolism	glucose 1,6-bisphosphate synthase [Homo sapiens]	--
ENSG00000076351	SLC46A1	1.64909	375	1.40593	288	2.86215	655	1.07313	255	2.79611	615	1.13458	281	0.0361716	-0.675489	down	--	--	--	K14613|0|mcc:708727|K14613 MFS transporter, PCFT/HCP family, solute carrier family 46 (folate transporter), member 1 | (RefSeq) SLC46A1; solute carrier family 46 member 1	--	[R]	General function prediction only	Major Facilitator Superfamily	Proton-coupled folate transporter OS=Homo sapiens OX=9606 GN=SLC46A1 PE=1 SV=1	G	Carbohydrate transport and metabolism	PREDICTED: proton-coupled folate transporter [Macaca mulatta]	--
Human_newGene_36840	--	0.77667	76	0.279939	25	0.779554	114	0.379598	38	0.748324	91	0.331036	53	0.0297782	-1.01426	down	--	--	Molecular Function: beta-glucuronidase activity (GO:0004566);; Biological Process: carbohydrate metabolic process (GO:0005975);; Biological Process: hyaluronan catabolic process (GO:0030214);; Cellular Component: lysosomal lumen (GO:0043202);; Biological Process: small molecule metabolic process (GO:0044281);;	--	--	--	--	Glycosyl hydrolases family 2, TIM barrel domain	Beta-glucuronidase OS=Homo sapiens OX=9606 GN=GUSB PE=1 SV=2	G	Carbohydrate transport and metabolism	PREDICTED: beta-glucuronidase [Callithrix jacchus]	molecular function: catalytic activity (GO:0003824);; biological process: metabolic process (GO:0008152);; biological process: cellular process (GO:0009987);; biological process: single-organism process (GO:0044699);; cellular component: organelle part (GO:0044422);; cellular component: cell (GO:0005623);; cellular component: membrane-enclosed lumen (GO:0031974);; cellular component: organelle (G…
ENSG00000146411	SLC2A12	0.251412	40	0.23148	35	1.24711	226	0.285181	51	1.32703	225	0.23619	46	0.00528738	-1.51773	down	[G]	Carbohydrate transport and metabolism	Molecular Function: sugar:proton symporter activity (GO:0005351);; Cellular Component: integral component of plasma membrane (GO:0005887);; Cellular Component: endomembrane system (GO:0012505);; Biological Process: proton transport (GO:0015992);; Biological Process: glucose import (GO:0046323);; Cellular Component: perinuclear region of cytoplasm (GO:0048471);; Molecular Function: D-glucose trans…	K08149|0|hsa:154091|K08149 MFS transporter, SP family, solute carrier family 2 (facilitated glucose transporter), member 12 | (RefSeq) SLC2A12, GLUT12, GLUT8; solute carrier family 2 member 12	--	[R]	General function prediction only	Sugar (and other) transporter;; Major Facilitator Superfamily	Solute carrier family 2, facilitated glucose transporter member 12 OS=Homo sapiens OX=9606 GN=SLC2A12 PE=2 SV=1	G	Carbohydrate transport and metabolism	solute carrier family 2, facilitated glucose transporter member 12 [Homo sapiens]	molecular function: transporter activity (GO:0005215);; biological process: single-organism process (GO:0044699);; biological process: localization (GO:0051179);; cellular component: cell (GO:0005623);; cellular component: cell part (GO:0044464);; cellular component: membrane (GO:0016020);; cellular component: membrane part (GO:0044425);;
ENSG00000108055	SMC3	10.5862	1551	8.41168	1171	26.1009	4342	12.1691	1966	26.006	4056	10.8144	1917	0.0333555	-0.653404	down	[D]	Cell cycle control, cell division, chromosome partitioning	--	K06669|0|umr:103657014|K06669 structural maintenance of chromosome 3 (chondroitin sulfate proteoglycan 6) | (RefSeq) SMC3; structural maintenance of chromosomes 3	Cell cycle (ko04110);; Oocyte meiosis (ko04114)	[D]	Cell cycle control, cell division, chromosome partitioning	RecF/RecN/SMC N terminal domain;; SMC proteins Flexible Hinge Domain;; AAA ATPase domain;; AAA domain, putative AbiEii toxin, Type IV TA system;; AAA domain	Structural maintenance of chromosomes protein 3 OS=Homo sapiens OX=9606 GN=SMC3 PE=1 SV=2	D	Cell cycle control, cell division, chromosome partitioning	structural maintenance of chromosomes protein 3 [Homo sapiens]	--
ENSG00000175305	CCNE2	0.647466	63	0.553463	35	3.60088	390	1.32625	133	3.27939	361	0.981577	116	0.0356604	-1.18572	down	--	--	Biological Process: cell cycle checkpoint (GO:0000075);; Biological Process: regulation of cyclin-dependent protein serine/threonine kinase activity (GO:0000079);; Biological Process: G1/S transition of mitotic cell cycle (GO:0000082);; Cellular Component: nucleoplasm (GO:0005654);; Cellular Component: cytosol (GO:0005829);; Biological Process: DNA replication initiation (GO:0006270);; Molecular …	K06626|0|hsa:9134|K06626 cyclin E | (RefSeq) CCNE2, CYCE2; cyclin E2	Cell cycle (ko04110);; Oocyte meiosis (ko04114);; p53 signaling pathway (ko04115);; PI3K-Akt signaling pathway (ko04151);; Hepatitis B (ko05161);; Measles (ko05162);; Pathways in cancer (ko05200);; Viral carcinogenesis (ko05203);; MicroRNAs in cancer (ko05206);; Prostate cancer (ko05215);; Small cell lung cancer (ko05222)	[D]	Cell cycle control, cell division, chromosome partitioning	Cyclin, N-terminal domain;; Cyclin, C-terminal domain	G1/S-specific cyclin-E2 OS=Homo sapiens OX=9606 GN=CCNE2 PE=1 SV=1	D	Cell cycle control, cell division, chromosome partitioning	G1/S-specific cyclin-E2 [Homo sapiens]	molecular function: molecular function regulator (GO:0098772);; molecular function: binding (GO:0005488);; biological process: single-organism process (GO:0044699);; biological process: cellular process (GO:0009987);; biological process: metabolic process (GO:0008152);; biological process: biological regulation (GO:0065007);; cellular component: cell (GO:0005623);; cellular component: organelle p…
ENSG00000162063	CCNF	5.60004	828	3.95542	566	15.868	2722	6.48018	1042	17.7927	2694	4.7781	778	0.00171755	-1.04995	down	--	--	Biological Process: re-entry into mitotic cell cycle (GO:0000320);; Biological Process: placenta development (GO:0001890);; Molecular Function: protein binding (GO:0005515);; Cellular Component: nucleus (GO:0005634);; Cellular Component: centriole (GO:0005814);; Biological Process: mitotic cell cycle (GO:0007067);; Biological Process: negative regulation of centrosome duplication (GO:0010826);; B…	K10289|0|hsa:899|K10289 F-box protein 1 (cyclin F) | (RefSeq) CCNF, FBX1, FBXO1; cyclin F	--	[D]	Cell cycle control, cell division, chromosome partitioning	Cyclin, N-terminal domain;; Cyclin, C-terminal domain;; F-box domain;; F-box-like	Cyclin-F OS=Homo sapiens OX=9606 GN=CCNF PE=1 SV=2	D	Cell cycle control, cell division, chromosome partitioning	cyclin F [Homo sapiens]	biological process: reproduction (GO:0000003);; biological process: reproductive process (GO:0022414);; biological process: multicellular organismal process (GO:0032501);; biological process: single-organism process (GO:0044699);; biological process: developmental process (GO:0032502);; biological process: metabolic process (GO:0008152);; biological process: cellular process (GO:0009987);; biolog…
ENSG00000164045	CDC25A	5.18108	657	2.81334	331	10.083	1389	5.4193	679	10.5345	1345	3.88754	533	0.00580704	-0.840556	down	--	--	Biological Process: regulation of cyclin-dependent protein serine/threonine kinase activity (GO:0000079);; Biological Process: G1/S transition of mitotic cell cycle (GO:0000082);; Biological Process: G2/M transition of mitotic cell cycle (GO:0000086);; Molecular Function: protein tyrosine phosphatase activity (GO:0004725);; Cellular Component: nucleoplasm (GO:0005654);; Cellular Component: cytoso…	K06645|0|hsa:993|K06645 M-phase inducer phosphatase 1 [EC:3.1.3.48] | (RefSeq) CDC25A, CDC25A2; cell division cycle 25A	Cell cycle (ko04110);; Progesterone-mediated oocyte maturation (ko04914);; MicroRNAs in cancer (ko05206)	[D]	Cell cycle control, cell division, chromosome partitioning	M-phase inducer phosphatase;; Rhodanese-like domain	M-phase inducer phosphatase 1 OS=Homo sapiens OX=9606 GN=CDC25A PE=1 SV=2	D	Cell cycle control, cell division, chromosome partitioning	M-phase inducer phosphatase 1 isoform a [Homo sapiens]	cellular component: cell (GO:0005623);; cellular component: organelle part (GO:0044422);; cellular component: organelle (GO:0043226);; cellular component: cell part (GO:0044464);; biological process: single-organism process (GO:0044699);; biological process: response to stimulus (GO:0050896);; biological process: biological regulation (GO:0065007);; biological process: metabolic process (GO:00081…
ENSG00000182963	GJC1	8.1049	784	3.67602	323	13.0108	2112	6.26213	991	19.8631	2439	4.16262	549	0.00114615	-1.21309	down	--	--	Biological Process: vasculogenesis (GO:0001570);; Molecular Function: ion channel activity (GO:0005216);; Molecular Function: gap junction channel activity (GO:0005243);; Molecular Function: protein binding (GO:0005515);; Cellular Component: endoplasmic reticulum membrane (GO:0005789);; Cellular Component: integral component of plasma membrane (GO:0005887);; Cellular Component: connexin complex (…	K07616|0|ptr:454736|K07616 gap junction protein, alpha 7 | (RefSeq) GJC1, GJA7; gap junction protein gamma 1	--	--	--	Connexin	Gap junction gamma-1 protein OS=Homo sapiens OX=9606 GN=GJC1 PE=1 SV=2	D	Cell cycle control, cell division, chromosome partitioning	gap junction gamma-1 protein [Homo sapiens]	molecular function: binding (GO:0005488);; molecular function: transporter activity (GO:0005215);; biological process: developmental process (GO:0032502);; biological process: multicellular organismal process (GO:0032501);; biological process: single-organism process (GO:0044699);; biological process: cellular component organization or biogenesis (GO:0071840);; biological process: cellular proces…
ENSG00000184661	CDCA2	2.45805	324	2.48152	305	6.99238	1054	3.03647	436	6.95455	959	2.47228	398	0.046303	-0.691028	down	--	--	Cellular Component: nucleoplasm (GO:0005654);; Cellular Component: chromosome (GO:0005694);; Cellular Component: cytoplasm (GO:0005737);; Biological Process: chromosome segregation (GO:0007059);; Biological Process: mitotic cell cycle (GO:0007067);; Biological Process: positive regulation of protein dephosphorylation (GO:0035307);; Biological Process: cell division (GO:0051301);;	K17590|0|hsa:157313|K17590 cell division cycle-associated protein 2 | (RefSeq) CDCA2, PPP1R81, Repo-Man; cell division cycle associated 2	--	--	--	Protein phosphatase 1 binding	Cell division cycle-associated protein 2 OS=Homo sapiens OX=9606 GN=CDCA2 PE=1 SV=2	D	Cell cycle control, cell division, chromosome partitioning	cell division cycle-associated protein 2 isoform 1 [Homo sapiens]	cellular component: organelle part (GO:0044422);; cellular component: cell (GO:0005623);; cellular component: cell part (GO:0044464);; cellular component: organelle (GO:0043226);; biological process: cellular process (GO:0009987);; biological process: biological regulation (GO:0065007);; biological process: single-organism process (GO:0044699);;
ENSG00000135083	CCNJL	1.71264	198	0.573919	70	4.10754	537	1.23929	159	3.76176	457	1.10384	153	0.00091766	-1.33764	down	--	--	Molecular Function: protein binding (GO:0005515);; Cellular Component: nucleus (GO:0005634);;	--	--	--	--	Cyclin, N-terminal domain;; Cyclin, C-terminal domain	Cyclin-J-like protein OS=Homo sapiens OX=9606 GN=CCNJL PE=2 SV=3	D	Cell cycle control, cell division, chromosome partitioning	PREDICTED: cyclin-J-like protein isoform X4 [Homo sapiens]	cellular component: cell (GO:0005623);; cellular component: cell part (GO:0044464);; cellular component: organelle (GO:0043226);; molecular function: binding (GO:0005488);;
Human_newGene_12083	--	1.30644	131	0.770731	79	2.25541	230	0.61993	75	1.95784	180	0.348268	55	0.0146422	-1.04838	down	--	--	Molecular Function: ubiquitin-protein transferase activity (GO:0004842);; Molecular Function: guanyl-nucleotide exchange factor activity (GO:0005085);; Cellular Component: nucleus (GO:0005634);; Cellular Component: mitochondrial inner membrane (GO:0005743);; Cellular Component: centriole (GO:0005814);; Biological Process: DNA repair (GO:0006281);; Biological Process: intracellular protein transpo…	K10595|0|pps:100976978|K10595 E3 ubiquitin-protein ligase HERC2 [EC:2.3.2.26] | (RefSeq) HERC2; HECT and RLD domain containing E3 ubiquitin protein ligase 2	Ubiquitin mediated proteolysis (ko04120)	[S]	Function unknown	Mib_herc2	E3 ubiquitin-protein ligase HERC2 OS=Homo sapiens OX=9606 GN=HERC2 PE=1 SV=2	DZ	Cell cycle control, cell division, chromosome partitioning;; Cytoskeleton	PREDICTED: LOW QUALITY PROTEIN: E3 ubiquitin-protein ligase HERC2 [Pan paniscus]	cellular component: cell (GO:0005623);; cellular component: organelle part (GO:0044422);; cellular component: membrane (GO:0016020);; cellular component: cell part (GO:0044464);; cellular component: organelle (GO:0043226);; molecular function: catalytic activity (GO:0003824);; molecular function: molecular function regulator (GO:0098772);; molecular function: binding (GO:0005488);; biological pro…
ENSG00000183166	CALN1	0.990769	290	0.888903	264	3.09602	1167	1.32834	463	3.67009	1305	1.04828	424	0.0208703	-0.913188	down	[T]	Signal transduction mechanisms	Molecular Function: calcium ion binding (GO:0005509);; Cellular Component: plasma membrane (GO:0005886);; Cellular Component: integral component of membrane (GO:0016021);; Cellular Component: trans-Golgi network membrane (GO:0032588);; Cellular Component: perinuclear region of cytoplasm (GO:0048471);;	--	--	[T]	Signal transduction mechanisms	EF hand;; EF-hand domain pair;; EF-hand domain;; EF hand;; EF-hand domain pair	Calcium-binding protein 8 OS=Homo sapiens OX=9606 GN=CALN1 PE=1 SV=1	DTZ	Cell cycle control, cell division, chromosome partitioning;; Signal transduction mechanisms;; Cytoskeleton	calcium-binding protein 8 isoform X3 [Aotus nancymaae]	cellular component: organelle part (GO:0044422);; cellular component: cell (GO:0005623);; cellular component: membrane part (GO:0044425);; cellular component: membrane (GO:0016020);; cellular component: organelle (GO:0043226);; cellular component: cell part (GO:0044464);; molecular function: binding (GO:0005488);;
ENSG00000100281	HMGXB4	6.51844	797	3.7783	454	16.6387	2326	7.47049	1022	19.0091	2235	5.30492	818	0.00590762	-0.908384	down	--	--	--	K11298|0|hsa:10042|K11298 high mobility group protein 2-like 1 | (RefSeq) HMGXB4, HMG2L1, HMGBCG, THC211630; HMG-box containing 4	--	--	--	Domain of unknown function (DUF4171);; HMG (high mobility group) box;; HMG-box domain	HMG domain-containing protein 4 OS=Homo sapiens OX=9606 GN=HMGXB4 PE=1 SV=2	B	Chromatin structure and dynamics	HMG domain-containing protein 4 [Homo sapiens]	--
ENSG00000156650	KAT6B	1.78045	256	0.864328	166	2.62082	775	1.26274	301	2.82536	695	0.95333	232	0.0085296	-0.973859	down	--	--	--	K11306|0|pps:100988776|K11306 histone acetyltransferase MYST4 [EC:2.3.1.48] | (RefSeq) KAT6B; lysine acetyltransferase 6B	--	[B]	Chromatin structure and dynamics	MOZ/SAS family;; PHD-finger;; linker histone H1 and H5 family	Histone acetyltransferase KAT6B OS=Homo sapiens OX=9606 GN=KAT6B PE=1 SV=3	B	Chromatin structure and dynamics	PREDICTED: histone acetyltransferase KAT6B isoform X1 [Pan troglodytes]	--
ENSG00000083168	KAT6A	2.30328	630	1.94073	443	5.08	1540	1.86118	539	6.12203	1670	2.08807	591	0.00183394	-0.953626	down	--	--	--	K11305|0|hsa:7994|K11305 histone acetyltransferase MYST3 [EC:2.3.1.48] | (RefSeq) KAT6A, MOZ, MRD32, MYST-3, MYST3, RUNXBP2, ZC2HC6A, ZNF220; lysine acetyltransferase 6A	Signaling pathways regulating pluripotency of stem cells (ko04550)	[B]	Chromatin structure and dynamics	MOZ/SAS family;; PHD-finger;; linker histone H1 and H5 family	Histone acetyltransferase KAT6A OS=Homo sapiens OX=9606 GN=KAT6A PE=1 SV=2	B	Chromatin structure and dynamics	histone acetyltransferase KAT6A isoform 1 [Homo sapiens]	--
ENSG00000169375	SIN3A	5.63106	985	4.5654	619	16.2135	3566	6.77886	1474	19.4129	3804	5.51593	1209	0.00675323	-1.01107	down	--	--	--	K11644|0|hsa:25942|K11644 paired amphipathic helix protein Sin3a | (RefSeq) SIN3A, WITKOS; SIN3 transcription regulator family member A	Thyroid hormone signaling pathway (ko04919);; Huntington's disease (ko05016);; Transcriptional misregulation in cancer (ko05202)	[B]	Chromatin structure and dynamics	C-terminal domain of Sin3a protein;; Paired amphipathic helix repeat;; Sin3 family co-repressor	Paired amphipathic helix protein Sin3a OS=Homo sapiens OX=9606 GN=SIN3A PE=1 SV=2	B	Chromatin structure and dynamics	PREDICTED: paired amphipathic helix protein Sin3a isoform X1 [Pan troglodytes]	--
ENSG00000114439	BBX	4.54849	1102	2.98953	454	8.4581	2214	2.51724	250	7.99194	1050	3.40882	966	0.00979869	-1.09368	down	--	--	--	--	--	[K]	Transcription	Domain of unknown function (DUF2028);; HMG (high mobility group) box;; HMG-box domain	HMG box transcription factor BBX OS=Homo sapiens OX=9606 GN=BBX PE=1 SV=1	B	Chromatin structure and dynamics	HMG box transcription factor BBX isoform 2 [Homo sapiens]	--
ENSG00000143842	SOX13	2.71526	296	1.22584	145	3.53664	498	2.0081	255	3.82837	477	1.66357	222	0.026742	-0.7503	down	--	--	--	K09269|0|hsa:9580|K09269 transcription factor SOX5/6/13 (SOX group D) | (RefSeq) SOX13, ICA12, Sox-13; SRY-box 13	--	[K]	Transcription	HMG (high mobility group) box;; HMG-box domain	Transcription factor SOX-13 OS=Homo sapiens OX=9606 GN=SOX13 PE=1 SV=3	B	Chromatin structure and dynamics	HMG box factor SOX-13 [Homo sapiens]	--
ENSG00000197724	PHF2	1.53263	304	1.04082	197	3.82251	861	1.88178	412	4.03498	852	1.26517	304	0.0225226	-0.823626	down	--	--	Cellular Component: condensed chromosome kinetochore (GO:0000777);; Biological Process: liver development (GO:0001889);; Molecular Function: transcription coactivator activity (GO:0003713);; Molecular Function: iron ion binding (GO:0005506);; Cellular Component: nucleoplasm (GO:0005654);; Cellular Component: nucleolus (GO:0005730);; Cellular Component: cytoplasm (GO:0005737);; Molecular Function:…	K19414|0|hsa:5253|K19414 lysine-specific demethylase PHF2 [EC:1.14.11.-] | (RefSeq) PHF2, CENP-35, GRC5, JHDM1E, KDM7C; PHD finger protein 2	--	[B]	Chromatin structure and dynamics	JmjC domain, hydroxylase;; PHD-finger;; Cupin-like domain	Lysine-specific demethylase PHF2 OS=Homo sapiens OX=9606 GN=PHF2 PE=1 SV=4	B	Chromatin structure and dynamics	lysine-specific demethylase PHF2 [Homo sapiens]	cellular component: organelle part (GO:0044422);; cellular component: cell (GO:0005623);; cellular component: cell part (GO:0044464);; cellular component: organelle (GO:0043226);; cellular component: macromolecular complex (GO:0032991);; biological process: cellular component organization or biogenesis (GO:0071840);; biological process: single-organism process (GO:0044699);; biological process: d…
ENSG00000157106	SMG1	13.576	6326	9.04854	4176	15.8745	8490	6.11681	3427	17.7263	7985	8.20397	4514	0.0245507	-0.617923	down	--	--	--	K08873|0|hsa:23049|K08873 serine/threonine-protein kinase SMG1 [EC:2.7.11.1] | (RefSeq) SMG1, 61E3.4, ATX, LIP; SMG1, nonsense mediated mRNA decay associated PI3K related kinase	mRNA surveillance pathway (ko03015)	[L]	Replication, recombination and repair	Serine/threonine-protein kinase smg-1;; Phosphatidylinositol 3- and 4-kinase;; Region of unknown function (DUF5303);; FATC domain	Serine/threonine-protein kinase SMG1 OS=Homo sapiens OX=9606 GN=SMG1 PE=1 SV=3	BDLTU	Chromatin structure and dynamics;; Cell cycle control, cell division, chromosome partitioning;; Replication, recombination and repair;; Signal transduction mechanisms;; Intracellular trafficking, secretion, and vesicular transport	serine/threonine-protein kinase SMG1 [Homo sapiens]	--
Human_newGene_11809	--	1.91273	71	0.267129	15	0.867137	56	0.06298	4	1.92204	86	0.258453	18	0.000246826	-2.24432	down	--	--	Biological Process: nuclear-transcribed mRNA catabolic process, nonsense-mediated decay (GO:0000184);; Molecular Function: protein serine/threonine kinase activity (GO:0004674);; Molecular Function: protein binding (GO:0005515);; Molecular Function: ATP binding (GO:0005524);; Cellular Component: nucleus (GO:0005634);; Cellular Component: cytosol (GO:0005829);; Biological Process: DNA repair (GO:0…	--	--	[L]	Replication, recombination and repair	--	Serine/threonine-protein kinase SMG1 OS=Homo sapiens OX=9606 GN=SMG1 PE=1 SV=3	BDLTU	Chromatin structure and dynamics;; Cell cycle control, cell division, chromosome partitioning;; Replication, recombination and repair;; Signal transduction mechanisms;; Intracellular trafficking, secretion, and vesicular transport	hypothetical protein CK820_G0056942 [Pan troglodytes]	cellular component: cell (GO:0005623);; cellular component: organelle (GO:0043226);; cellular component: cell part (GO:0044464);; molecular function: catalytic activity (GO:0003824);; molecular function: binding (GO:0005488);; biological process: metabolic process (GO:0008152);; biological process: cellular process (GO:0009987);; biological process: biological regulation (GO:0065007);; biological…
ENSG00000133056	PIK3C2B	1.63032	190	0.533094	87	2.09558	449	0.982698	177	2.79043	541	0.517904	116	0.00107791	-1.31835	down	--	--	Molecular Function: lipid kinase activity (GO:0001727);; Molecular Function: protein binding (GO:0005515);; Molecular Function: ATP binding (GO:0005524);; Cellular Component: nucleus (GO:0005634);; Cellular Component: endoplasmic reticulum (GO:0005783);; Cellular Component: cytosol (GO:0005829);; Cellular Component: plasma membrane (GO:0005886);; Cellular Component: phosphatidylinositol 3-kinase …	K00923|0|hsa:5287|K00923 phosphatidylinositol-4-phosphate 3-kinase [EC:2.7.1.154] | (RefSeq) PIK3C2B, C2-PI3K; phosphatidylinositol-4-phosphate 3-kinase catalytic subunit type 2 beta	Inositol phosphate metabolism (ko00562);; Phosphatidylinositol signaling system (ko04070)	[T]	Signal transduction mechanisms	Phosphatidylinositol 3- and 4-kinase;; Phosphoinositide 3-kinase family, accessory domain (PIK domain);; Phosphoinositide 3-kinase C2;; PI3-kinase family, ras-binding domain;; PX domain;; C2 domain	Phosphatidylinositol 4-phosphate 3-kinase C2 domain-containing subunit beta OS=Homo sapiens OX=9606 GN=PIK3C2B PE=1 SV=2	BDLTU	Chromatin structure and dynamics;; Cell cycle control, cell division, chromosome partitioning;; Replication, recombination and repair;; Signal transduction mechanisms;; Intracellular trafficking, secretion, and vesicular transport	phosphatidylinositol 4-phosphate 3-kinase C2 domain-containing subunit beta [Homo sapiens]	cellular component: membrane (GO:0016020);; cellular component: cell part (GO:0044464);; cellular component: organelle (GO:0043226);; cellular component: macromolecular complex (GO:0032991);; cellular component: membrane part (GO:0044425);; cellular component: cell (GO:0005623);; molecular function: binding (GO:0005488);; molecular function: catalytic activity (GO:0003824);; biological process: r…
ENSG00000048052	HDAC9	2.50309	219	1.70157	156	4.18117	558	2.06478	193	3.47302	473	1.51676	169	0.00972221	-0.934396	down	[BQ]	Chromatin structure and dynamics;; Secondary metabolites biosynthesis, transport and catabolism	Cellular Component: histone deacetylase complex (GO:0000118);; Biological Process: negative regulation of transcription from RNA polymerase II promoter (GO:0000122);; Molecular Function: protein kinase C binding (GO:0005080);; Cellular Component: transcription factor complex (GO:0005667);; Cellular Component: cytoplasm (GO:0005737);; Molecular Function: NAD-dependent histone deacetylase activity …	K11409|0|mcf:102121227|K11409 histone deacetylase 9 [EC:3.5.1.98] | (RefSeq) HDAC9; histone deacetylase 9	Alcoholism (ko05034);; Viral carcinogenesis (ko05203)	[B]	Chromatin structure and dynamics	Histone deacetylase domain;; Glutamine rich N terminal domain of histone deacetylase 4	Histone deacetylase 9 OS=Homo sapiens OX=9606 GN=HDAC9 PE=1 SV=2	BQ	Chromatin structure and dynamics;; Secondary metabolites biosynthesis, transport and catabolism	PREDICTED: histone deacetylase 9 isoform X14 [Macaca fascicularis]	molecular function: catalytic activity (GO:0003824);; molecular function: binding (GO:0005488);; biological process: response to stimulus (GO:0050896);; biological process: cellular component organization or biogenesis (GO:0071840);; biological process: biological regulation (GO:0065007);; biological process: metabolic process (GO:0008152);; biological process: cellular process (GO:0009987);; cel…
ENSG00000198604	BAZ1A	2.42513	510	2.39774	406	6.23963	1408	2.93881	604	6.09401	1342	2.49869	618	0.0332401	-0.672753	down	--	--	--	K11655|0|hsa:11177|K11655 bromodomain adjacent to zinc finger domain protein 1A | (RefSeq) BAZ1A, ACF1, WALp1, WCRF180, hACF1; bromodomain adjacent to zinc finger domain 1A	--	[B]	Chromatin structure and dynamics	ATP-utilising chromatin assembly and remodelling N-terminal;; Williams-Beuren syndrome DDT (WSD), D-TOX E motif;; Bromodomain;; DDT domain;; PHD-finger;; WSTF, HB1, Itc1p, MBD9 motif 1	Bromodomain adjacent to zinc finger domain protein 1A OS=Homo sapiens OX=9606 GN=BAZ1A PE=1 SV=2	BK	Chromatin structure and dynamics;; Transcription	bromodomain adjacent to zinc finger domain protein 1A isoform a [Homo sapiens]	--
ENSG00000123636	BAZ2B	2.1416	246	2.50781	217	7.40677	663	0.732726	196	6.07472	667	1.95185	229	0.0109557	-0.937936	down	--	--	--	--	--	[B]	Chromatin structure and dynamics	Bromodomain;; Methyl-CpG binding domain;; Williams-Beuren syndrome DDT (WSD), D-TOX E motif;; PHD-finger;; DDT domain	Bromodomain adjacent to zinc finger domain protein 2B OS=Homo sapiens OX=9606 GN=BAZ2B PE=1 SV=3	BK	Chromatin structure and dynamics;; Transcription	PREDICTED: bromodomain adjacent to zinc finger domain protein 2B isoform X1 [Homo sapiens]	--
ENSG00000171634	BPTF	7.68268	1600	5.86825	1115	12.287	2925	6.7068	1250	12.1383	2879	5.09904	1402	0.0116973	-0.664024	down	--	--	--	K11728|0|ggo:101132650|K11728 nucleosome-remodeling factor subunit BPTF | (RefSeq) BPTF; bromodomain PHD finger transcription factor	--	[BK]	Chromatin structure and dynamics;; Transcription	Bromodomain;; PHD-finger;; DDT domain;; Williams-Beuren syndrome DDT (WSD), D-TOX E motif;; WSTF, HB1, Itc1p, MBD9 motif 1	Nucleosome-remodeling factor subunit BPTF OS=Homo sapiens OX=9606 GN=BPTF PE=1 SV=3	BK	Chromatin structure and dynamics;; Transcription	RecName: Full=Nucleosome-remodeling factor subunit BPTF; AltName: Full=Bromodomain and PHD finger-containing transcription factor; AltName: Full=Fetal Alz-50 clone 1 protein; AltName: Full=Fetal Alzheimer antigen	--
ENSG00000099954	CECR2	0.755112	135	0.414958	87	2.84852	614	0.7129	178	2.28073	448	0.531801	144	0.00677133	-1.20317	down	--	--	--	--	--	[BK]	Chromatin structure and dynamics;; Transcription	Bromodomain	Cat eye syndrome critical region protein 2 OS=Homo sapiens OX=9606 GN=CECR2 PE=1 SV=2	BK	Chromatin structure and dynamics;; Transcription	CECR2 isoform 7 [Pan troglodytes]	--
ENSG00000169925	BRD3	1.74798	347	1.20125	227	4.42135	954	2.10973	469	4.7106	992	1.89934	419	0.0404483	-0.725287	down	--	--	--	K11721|0|hsa:8019|K11721 bromodomain-containing protein 3 | (RefSeq) BRD3, ORFX, RING3L; bromodomain containing 3	--	[K]	Transcription	Bromodomain;; Bromodomain extra-terminal - transcription regulation	Bromodomain-containing protein 3 OS=Homo sapiens OX=9606 GN=BRD3 PE=1 SV=1	BK	Chromatin structure and dynamics;; Transcription	bromodomain-containing protein 3 [Homo sapiens]	--
ENSG00000100393	EP300	4.76662	1507	3.12638	976	9.18416	3517	4.45108	1676	9.84133	3455	4.19044	1596	0.0183195	-0.687394	down	--	--	--	K04498|0|hsa:2033|K04498 E1A/CREB-binding protein [EC:2.3.1.48] | (RefSeq) EP300, KAT3B, RSTS2, p300; E1A binding protein p300	cAMP signaling pathway (ko04024);; HIF-1 signaling pathway (ko04066);; FoxO signaling pathway (ko04068);; Cell cycle (ko04110);; Wnt signaling pathway (ko04310);; Notch signaling pathway (ko04330);; TGF-beta signaling pathway (ko04350);; Adherens junction (ko04520);; Jak-STAT signaling pathway (ko04630);; Long-term potentiation (ko04720);; Melanogenesis (ko04916);; Thyroid hormone signaling pathw…	[K]	Transcription	Histone acetylation protein;; KIX domain;; Creb binding;; TAZ zinc finger;; Domain of Unknown Function (DUF902);; Bromodomain;; Zinc finger, ZZ type	Histone acetyltransferase p300 OS=Homo sapiens OX=9606 GN=EP300 PE=1 SV=2	BK	Chromatin structure and dynamics;; Transcription	PREDICTED: histone acetyltransferase p300 isoform X1 [Homo sapiens]	--
ENSG00000005339	CREBBP	6.27132	1801	4.24188	1159	11.5473	3795	4.99054	1754	11.1443	3660	4.48889	1632	0.00930202	-0.717052	down	--	--	Biological Process: negative regulation of transcription from RNA polymerase II promoter (GO:0000122);; Cellular Component: histone acetyltransferase complex (GO:0000123);; Cellular Component: nuclear chromatin (GO:0000790);; Molecular Function: core promoter proximal region sequence-specific DNA binding (GO:0000987);; Molecular Function: transcriptional repressor activity, RNA polymerase II core…	K04498|0|ptr:467891|K04498 E1A/CREB-binding protein [EC:2.3.1.48] | (RefSeq) CREBBP; CREB binding protein	cAMP signaling pathway (ko04024);; HIF-1 signaling pathway (ko04066);; FoxO signaling pathway (ko04068);; Cell cycle (ko04110);; Wnt signaling pathway (ko04310);; Notch signaling pathway (ko04330);; TGF-beta signaling pathway (ko04350);; Adherens junction (ko04520);; Jak-STAT signaling pathway (ko04630);; Long-term potentiation (ko04720);; Melanogenesis (ko04916);; Thyroid hormone signaling pathw…	[K]	Transcription	Histone acetylation protein;; KIX domain;; Creb binding;; TAZ zinc finger;; Domain of Unknown Function (DUF902);; Bromodomain;; Zinc finger, ZZ type	CREB-binding protein OS=Homo sapiens OX=9606 GN=CREBBP PE=1 SV=3	BK	Chromatin structure and dynamics;; Transcription	CREB-binding protein isoform b [Homo sapiens]	molecular function: transcription factor activity, protein binding (GO:0000988);; molecular function: binding (GO:0005488);; molecular function: catalytic activity (GO:0003824);; molecular function: signal transducer activity (GO:0004871);; molecular function: nucleic acid binding transcription factor activity (GO:0001071);; biological process: biological regulation (GO:0065007);; biological proc…
ENSG00000185658	BRWD1	0.514209	222	0.282415	97	2.24648	633	0.543132	250	1.52046	515	1.35676	291	0.0490068	-0.807092	down	[R]	General function prediction only	Cellular Component: nucleolus (GO:0005730);; Cellular Component: cytoplasm (GO:0005737);; Biological Process: regulation of transcription from RNA polymerase II promoter (GO:0006357);; Biological Process: cytoskeleton organization (GO:0007010);; Biological Process: regulation of cell shape (GO:0008360);;	K11798|0|cjc:100399542|K11798 bromodomain and WD repeat domain containing protein 1/3 | (RefSeq) BRWD1; bromodomain and WD repeat domain containing 1	--	[R]	General function prediction only	Bromodomain;; WD domain, G-beta repeat;; Anaphase-promoting complex subunit 4 WD40 domain	Bromodomain and WD repeat-containing protein 1 OS=Homo sapiens OX=9606 GN=BRWD1 PE=1 SV=4	BK	Chromatin structure and dynamics;; Transcription	homolog to cAMP response element binding and beta transducin family proteins, partial [Homo sapiens]	cellular component: organelle (GO:0043226);; cellular component: cell part (GO:0044464);; cellular component: cell (GO:0005623);; cellular component: organelle part (GO:0044422);; biological process: biological regulation (GO:0065007);; biological process: cellular process (GO:0009987);; biological process: cellular component organization or biogenesis (GO:0071840);;
ENSG00000171723	GPHN	2.57832	351	1.87086	249	5.22726	862	2.4957	386	4.83629	762	1.64522	299	0.0207672	-0.757206	down	[H]	Coenzyme transport and metabolism	--	K15376|0|pps:100968051|K15376 gephyrin [EC:2.10.1.1 2.7.7.75] | (RefSeq) GPHN; gephyrin	GABAergic synapse (ko04727)	[H]	Coenzyme transport and metabolism	Probable molybdopterin binding domain;; MoeA N-terminal region (domain I and II);; MoeA C-terminal region (domain IV)	Gephyrin OS=Homo sapiens OX=9606 GN=GPHN PE=1 SV=1	H	Coenzyme transport and metabolism	gephyrin isoform 1 [Homo sapiens]	--
ENSG00000152782	PANK1	0.260065	58	0.155101	37	0.907738	251	0.421163	102	0.953557	248	0.238155	65	0.0321416	-1.11305	down	--	--	--	K09680|0|cjc:100407841|K09680 type II pantothenate kinase [EC:2.7.1.33] | (RefSeq) PANK1; pantothenate kinase 1	Pantothenate and CoA biosynthesis (ko00770)	[H]	Coenzyme transport and metabolism	Fumble	Pantothenate kinase 1 OS=Homo sapiens OX=9606 GN=PANK1 PE=1 SV=2	H	Coenzyme transport and metabolism	PANK1 isoform 1 [Pongo abelii]	--
ENSG00000100596	SPTLC2	2.08359	590	1.79098	447	6.44447	2102	3.04825	972	6.38003	1970	1.9185	676	0.0208302	-0.820197	down	[H]	Coenzyme transport and metabolism	--	K00654|0|hsa:9517|K00654 serine palmitoyltransferase [EC:2.3.1.50] | (RefSeq) SPTLC2, HSN1C, LCB2, LCB2A, NSAN1C, SPT2, hLCB2a; serine palmitoyltransferase long chain base subunit 2	Sphingolipid metabolism (ko00600);; Sphingolipid signaling pathway (ko04071)	[O]	Posttranslational modification, protein turnover, chaperones	Aminotransferase class I and II	Serine palmitoyltransferase 2 OS=Homo sapiens OX=9606 GN=SPTLC2 PE=1 SV=1	H	Coenzyme transport and metabolism	serine palmitoyltransferase 2 [Homo sapiens]	--
ENSG00000196526	AFAP1	1.93866	520	1.78638	456	5.59898	1704	2.62372	776	6.16892	1759	1.93786	630	0.0268191	-0.755949	down	--	--	--	K18616|0|pps:100977238|K18616 actin filament associated protein 1 | (RefSeq) AFAP1; actin filament associated protein 1	--	--	--	PH domain	Actin filament-associated protein 1 OS=Homo sapiens OX=9606 GN=AFAP1 PE=1 SV=2	Z	Cytoskeleton	actin filament-associated protein 1 isoform A [Homo sapiens]	--
ENSG00000150764	DIXDC1	1.0851	215	1.04963	190	1.99363	450	0.532882	104	1.94492	413	0.612239	143	0.0206097	-0.937369	down	--	--	--	--	--	--	--	DIX domain;; Calponin homology (CH) domain;; CAMSAP CH domain	Dixin OS=Homo sapiens OX=9606 GN=DIXDC1 PE=1 SV=2	Z	Cytoskeleton	dixin isoform a [Homo sapiens]	--
ENSG00000169641	LUZP1	5.65649	1588	4.32685	1037	9.00058	2726	3.69632	1100	7.72166	2329	3.47239	1125	0.00558313	-0.719031	down	--	--	--	--	--	--	--	--	Leucine zipper protein 1 OS=Homo sapiens OX=9606 GN=LUZP1 PE=1 SV=2	Z	Cytoskeleton	leucine zipper protein 1 [Homo sapiens]	--
ENSG00000066933	MYO9A	2.17112	674	2.03204	516	2.8676	1075	1.38147	492	3.72613	1167	1.71894	535	0.0351374	-0.604535	down	--	--	--	K10360|0|hsa:4649|K10360 myosin IX | (RefSeq) MYO9A; myosin IXA	--	[N]	Cell motility	Myosin head (motor domain);; RhoGAP domain;; Ras association (RalGDS/AF-6) domain;; IQ calmodulin-binding motif	Unconventional myosin-IXa OS=Homo sapiens OX=9606 GN=MYO9A PE=1 SV=2	Z	Cytoskeleton	unconventional myosin-IXa [Homo sapiens]	--
ENSG00000171943	SRGAP2C	2.22732	491	1.77419	375	3.96449	1079	2.03073	575	4.29332	1074	1.4118	406	0.0381045	-0.64309	down	--	--	--	--	--	[Z]	Cytoskeleton	Fes/CIP4, and EFC/F-BAR homology domain	SLIT-ROBO Rho GTPase-activating protein 2C OS=Homo sapiens OX=9606 GN=SRGAP2C PE=1 SV=1	Z	Cytoskeleton	SLIT-ROBO Rho GTPase-activating protein 2C isoform 1 [Homo sapiens]	--
ENSG00000066735	KIF26A	1.11491	267	0.671282	153	2.63295	715	0.975968	258	2.62587	669	0.828696	240	0.00454265	-1.02114	down	--	--	--	K10404|0|hsa:26153|K10404 kinesin family member 26 | (RefSeq) KIF26A; kinesin family member 26A	--	[Z]	Cytoskeleton	Kinesin motor domain;; Microtubule binding	Kinesin-like protein KIF26A OS=Homo sapiens OX=9606 GN=KIF26A PE=1 SV=3	Z	Cytoskeleton	KIF26A variant protein, partial [Homo sapiens]	--
ENSG00000166025	AMOTL1	2.75915	842	2.1913	633	6.07358	2140	2.86558	984	6.04692	1893	2.52482	924	0.0313366	-0.619421	down	--	--	Biological Process: establishment of cell polarity involved in ameboidal cell migration (GO:0003365);; Cellular Component: cytosol (GO:0005829);; Cellular Component: bicellular tight junction (GO:0005923);; Cellular Component: COP9 signalosome (GO:0008180);; Biological Process: Wnt signaling pathway (GO:0016055);; Cellular Component: apical plasma membrane (GO:0016324);; Cellular Component: lamel…	K06104|0|hsa:154810|K06104 angiomotin like | (RefSeq) AMOTL1, JEAP; angiomotin like 1	Tight junction (ko04530)	--	--	Angiomotin C terminal	Angiomotin-like protein 1 OS=Homo sapiens OX=9606 GN=AMOTL1 PE=1 SV=1	Z	Cytoskeleton	angiomotin-like protein 1 isoform 1 [Homo sapiens]	cellular component: macromolecular complex (GO:0032991);; cellular component: cell (GO:0005623);; cellular component: organelle part (GO:0044422);; cellular component: cell part (GO:0044464);; cellular component: membrane (GO:0016020);; cellular component: organelle (GO:0043226);; cellular component: membrane part (GO:0044425);; cellular component: cell junction (GO:0030054);; biological process:…
ENSG00000072864	NDE1	3.7914	334	6.10674	295	13.7637	1225	7.69887	475	22.3912	1441	5.66718	377	0.00714189	-1.0326	down	--	--	Biological Process: G2/M transition of mitotic cell cycle (GO:0000086);; Biological Process: establishment of mitotic spindle orientation (GO:0000132);; Cellular Component: condensed chromosome kinetochore (GO:0000777);; Biological Process: neuron migration (GO:0001764);; Cellular Component: cytosol (GO:0005829);; Cellular Component: kinesin complex (GO:0005871);; Cellular Component: microtubule …	K16738|0|hsa:54820|K16738 nuclear distribution protein NudE | (RefSeq) NDE1, HOM-TES-87, LIS4, MHAC, NDE, NUDE, NUDE1; nudE neurodevelopment protein 1	--	[Z]	Cytoskeleton	NUDE protein, C-terminal conserved region	Nuclear distribution protein nudE homolog 1 OS=Homo sapiens OX=9606 GN=NDE1 PE=1 SV=3	Z	Cytoskeleton	PREDICTED: nuclear distribution protein nudE homolog 1 isoform X3 [Macaca mulatta]	cellular component: supramolecular complex (GO:0099080);; cellular component: cell (GO:0005623);; cellular component: organelle part (GO:0044422);; cellular component: macromolecular complex (GO:0032991);; cellular component: synapse (GO:0045202);; cellular component: organelle (GO:0043226);; cellular component: membrane (GO:0016020);; cellular component: cell part (GO:0044464);; biological proce…
ENSG00000266028	SRGAP2	6.2297	737	5.76692	419	9.79362	1368	3.61256	475	12.9959	1276	3.99246	385	0.000199401	-1.0821	down	--	--	Biological Process: lamellipodium assembly involved in ameboidal cell migration (GO:0003363);; Molecular Function: GTPase activator activity (GO:0005096);; Cellular Component: nucleoplasm (GO:0005654);; Cellular Component: mitochondrial inner membrane (GO:0005743);; Cellular Component: cytosol (GO:0005829);; Biological Process: cell proliferation (GO:0008283);; Cellular Component: postsynaptic de…	K07526|0|mcf:102125143|K07526 SLIT-ROBO Rho GTPase activating protein | (RefSeq) SRGAP2; SLIT-ROBO Rho GTPase activating protein 2	Axon guidance (ko04360)	[Z]	Cytoskeleton	RhoGAP domain;; Fes/CIP4, and EFC/F-BAR homology domain;; SH3 domain;; Variant SH3 domain;; Variant SH3 domain	SLIT-ROBO Rho GTPase-activating protein 2 OS=Homo sapiens OX=9606 GN=SRGAP2 PE=1 SV=3	Z	Cytoskeleton	SLIT-ROBO Rho GTPase-activating protein 2 isoform X1 [Papio anubis]	cellular component: cell (GO:0005623);; cellular component: organelle part (GO:0044422);; cellular component: synapse part (GO:0044456);; cellular component: organelle (GO:0043226);; cellular component: cell part (GO:0044464);; cellular component: membrane (GO:0016020);; cellular component: synapse (GO:0045202);; cellular component: membrane part (GO:0044425);; cellular component: cell junction (…
ENSG00000186185	KIF18B	8.25566	1077	6.28621	768	18.0646	2774	7.37879	1065	18.4189	2555	6.80541	1078	0.00505917	-0.809981	down	--	--	Biological Process: mitotic sister chromatid segregation (GO:0000070);; Cellular Component: astral microtubule (GO:0000235);; Molecular Function: ATP binding (GO:0005524);; Cellular Component: nucleus (GO:0005634);; Cellular Component: kinesin complex (GO:0005871);; Biological Process: microtubule-based movement (GO:0007018);; Biological Process: microtubule depolymerization (GO:0007019);; Molecu…	--	--	--	--	Kinesin motor domain;; Microtubule binding	Kinesin-like protein KIF18B OS=Homo sapiens OX=9606 GN=KIF18B PE=1 SV=3	Z	Cytoskeleton	KIF18B [Homo sapiens]	biological process: biological regulation (GO:0065007);; biological process: cellular process (GO:0009987);; biological process: single-organism process (GO:0044699);; biological process: cellular component organization or biogenesis (GO:0071840);; molecular function: catalytic activity (GO:0003824);; molecular function: binding (GO:0005488);; cellular component: organelle (GO:0043226);; cellular…
ENSG00000138771	SHROOM3	0.410367	162	0.284634	107	1.2328	550	0.372454	162	1.58855	664	0.307254	146	0.00104762	-1.37846	down	--	--	Biological Process: neural tube closure (GO:0001843);; Biological Process: epithelial cell development (GO:0002064);; Cellular Component: cytoplasm (GO:0005737);; Cellular Component: microtubule (GO:0005874);; Cellular Component: adherens junction (GO:0005912);; Biological Process: pattern specification process (GO:0007389);; Biological Process: regulation of cell shape (GO:0008360);; Cellular Co…	K18625|0|hsa:57619|K18625 protein Shroom | (RefSeq) SHROOM3, APXL3, MSTP013, SHRM, ShrmL; shroom family member 3	Tight junction (ko04530)	--	--	Apx/Shroom domain ASD2;; Apx/Shroom domain ASD1;; PDZ domain (Also known as DHR or GLGF)	Protein Shroom3 OS=Homo sapiens OX=9606 GN=SHROOM3 PE=1 SV=2	Z	Cytoskeleton	protein Shroom3 [Homo sapiens]	biological process: biological regulation (GO:0065007);; biological process: cellular process (GO:0009987);; biological process: single-organism process (GO:0044699);; biological process: multicellular organismal process (GO:0032501);; biological process: developmental process (GO:0032502);; biological process: response to stimulus (GO:0050896);; biological process: localization (GO:0051179);; mo…
ENSG00000138182	KIF20B	3.13815	608	2.74787	587	9.73409	2375	2.93693	728	9.79101	2374	3.04363	827	0.00620683	-0.960276	down	--	--	Biological Process: neural tube closure (GO:0001843);; Molecular Function: ATP binding (GO:0005524);; Cellular Component: nucleoplasm (GO:0005654);; Cellular Component: nucleolus (GO:0005730);; Cellular Component: centrosome (GO:0005813);; Cellular Component: kinesin complex (GO:0005871);; Cellular Component: microtubule (GO:0005874);; Biological Process: microtubule-based movement (GO:0007018);;…	K10402|0|hsa:9585|K10402 kinesin family member 20 | (RefSeq) KIF20B, CT90, KRMP1, MPHOSPH1, MPP-1, MPP1; kinesin family member 20B	--	[Z]	Cytoskeleton	Kinesin motor domain;; Microtubule binding	Kinesin-like protein KIF20B OS=Homo sapiens OX=9606 GN=KIF20B PE=1 SV=3	Z	Cytoskeleton	kinesin-like protein KIF20B isoform 1 [Homo sapiens]	cellular component: cell (GO:0005623);; cellular component: supramolecular complex (GO:0099080);; cellular component: organelle part (GO:0044422);; cellular component: macromolecular complex (GO:0032991);; cellular component: cell part (GO:0044464);; cellular component: organelle (GO:0043226);; molecular function: binding (GO:0005488);; molecular function: catalytic activity (GO:0003824);; biolog…
ENSG00000166833	NAV2	0.461293	165	0.353385	135	1.34585	572	0.631892	270	2.40861	640	0.31942	154	0.02521	-0.956356	down	--	--	Biological Process: regulation of systemic arterial blood pressure by baroreceptor feedback (GO:0003025);; Molecular Function: helicase activity (GO:0004386);; Molecular Function: protein binding (GO:0005515);; Molecular Function: ATP binding (GO:0005524);; Cellular Component: interstitial matrix (GO:0005614);; Cellular Component: nucleoplasm (GO:0005654);; Biological Process: sensory perception …	K19483|0|hsa:89797|K19483 neuron navigator 2 [EC:3.6.4.12] | (RefSeq) NAV2, HELAD1, POMFIL2, RAINB1, STEERIN2, UNC53H2; neuron navigator 2	--	--	--	Calponin homology (CH) domain	Neuron navigator 2 OS=Homo sapiens OX=9606 GN=NAV2 PE=1 SV=3	Z	Cytoskeleton	neuron navigator 2 isoform 5 [Homo sapiens]	biological process: single-organism process (GO:0044699);; biological process: developmental process (GO:0032502);; biological process: multicellular organismal process (GO:0032501);; biological process: behavior (GO:0007610);; biological process: biological regulation (GO:0065007);; molecular function: catalytic activity (GO:0003824);; molecular function: binding (GO:0005488);; cellular componen…
Human_newGene_21219	--	0.162718	55	0.036653	12	0.443386	120	0.046184	17	0.334751	119	0.102949	21	1.22509e-05	-2.23821	down	--	--	Cellular Component: cell cortex (GO:0005938);;	K17299|0|pon:100436479|K17299 POTE ankyrin domain family protein | (RefSeq) POTE ankyrin domain family member I	--	[Z]	Cytoskeleton	Actin;; CCDC144C protein coiled-coil region;; Protein of unknown function (DUF1725);; CCDC144C protein coiled-coil region	POTE ankyrin domain family member E OS=Homo sapiens OX=9606 GN=POTEE PE=2 SV=3	Z	Cytoskeleton	POTE ankyrin domain family member B2 isoform X4 [Pongo abelii]	cellular component: cell (GO:0005623);; cellular component: cell part (GO:0044464);;
ENSG00000129422	MTUS1	0.781485	173	0.727843	154	3.76053	583	0.8771	216	3.14094	554	0.525599	142	0.0138222	-0.996021	down	--	--	Cellular Component: extracellular space (GO:0005615);; Cellular Component: nucleus (GO:0005634);; Cellular Component: mitochondrion (GO:0005739);; Cellular Component: Golgi apparatus (GO:0005794);; Cellular Component: microtubule organizing center (GO:0005815);; Cellular Component: spindle (GO:0005819);; Cellular Component: microtubule (GO:0005874);; Cellular Component: plasma membrane (GO:000588…	--	--	--	--	--	Microtubule-associated tumor suppressor 1 OS=Homo sapiens OX=9606 GN=MTUS1 PE=1 SV=2	Z	Cytoskeleton	microtubule-associated tumor suppressor 1 isoform 2 [Homo sapiens]	cellular component: extracellular region (GO:0005576);; cellular component: cell part (GO:0044464);; cellular component: membrane (GO:0016020);; cellular component: organelle (GO:0043226);; cellular component: extracellular region part (GO:0044421);; cellular component: supramolecular complex (GO:0099080);; cellular component: organelle part (GO:0044422);; cellular component: cell (GO:0005623);; …
ENSG00000145555	MYO10	8.35525	2670	6.92277	2135	18.8097	5806	11.5864	2762	14.9768	5289	7.43026	2287	0.0247844	-0.613604	down	--	--	Cellular Component: ruffle (GO:0001726);; Molecular Function: calmodulin binding (GO:0005516);; Molecular Function: ATP binding (GO:0005524);; Molecular Function: phosphatidylinositol-3,4,5-trisphosphate binding (GO:0005547);; Cellular Component: nucleolus (GO:0005730);; Cellular Component: cytosol (GO:0005829);; Cellular Component: cell cortex (GO:0005938);; Biological Process: regulation of cel…	K12559|0|hsa:4651|K12559 myosin X | (RefSeq) MYO10; myosin X	Fc gamma R-mediated phagocytosis (ko04666)	[N]	Cell motility	Myosin head (motor domain);; PH domain;; MyTH4 domain;; FERM central domain;; Unconventional myosin-X coiled coil domain;; Pleckstrin homology domain;; PH domain;; IQ calmodulin-binding motif;; Pleckstrin homology domain;; Ras association (RalGDS/AF-6) domain	Unconventional myosin-X OS=Homo sapiens OX=9606 GN=MYO10 PE=1 SV=3	Z	Cytoskeleton	MYO10 isoform 1 [Pan troglodytes]	cellular component: cell (GO:0005623);; cellular component: organelle part (GO:0044422);; cellular component: membrane part (GO:0044425);; cellular component: macromolecular complex (GO:0032991);; cellular component: cell part (GO:0044464);; cellular component: membrane (GO:0016020);; cellular component: organelle (GO:0043226);; molecular function: binding (GO:0005488);; molecular function: catal…
ENSG00000138160	KIF11	12.9744	2245	11.9422	1963	26.5752	5223	10.3441	1974	25.6307	4722	11.6604	2442	0.0337434	-0.599856	down	--	--	Cellular Component: spindle pole (GO:0000922);; Molecular Function: ATP binding (GO:0005524);; Cellular Component: cytosol (GO:0005829);; Cellular Component: kinesin complex (GO:0005871);; Cellular Component: spindle microtubule (GO:0005876);; Biological Process: retrograde vesicle-mediated transport, Golgi to ER (GO:0006890);; Biological Process: microtubule-based movement (GO:0007018);; Biologi…	K10398|0|hsa:3832|K10398 kinesin family member 11 | (RefSeq) KIF11, EG5, HKSP, KNSL1, MCLMR, TRIP5; kinesin family member 11	--	[Z]	Cytoskeleton	Kinesin motor domain;; Kinesin-associated microtubule-binding;; Microtubule binding	Kinesin-like protein KIF11 OS=Homo sapiens OX=9606 GN=KIF11 PE=1 SV=2	Z	Cytoskeleton	kinesin-like protein KIF11 [Homo sapiens]	cellular component: membrane (GO:0016020);; cellular component: cell part (GO:0044464);; cellular component: organelle (GO:0043226);; cellular component: macromolecular complex (GO:0032991);; cellular component: supramolecular complex (GO:0099080);; cellular component: cell (GO:0005623);; cellular component: organelle part (GO:0044422);; biological process: cellular process (GO:0009987);; biologi…
ENSG00000068796	KIF2A	8.01576	634	5.35486	428	17.9378	1621	7.75421	723	17.3052	1564	6.69097	629	0.0109154	-0.78116	down	--	--	Cellular Component: spindle pole (GO:0000922);; Molecular Function: microtubule motor activity (GO:0003777);; Molecular Function: ATP binding (GO:0005524);; Cellular Component: nucleolus (GO:0005730);; Cellular Component: centrosome (GO:0005813);; Cellular Component: cytosol (GO:0005829);; Cellular Component: kinesin complex (GO:0005871);; Cellular Component: spindle microtubule (GO:0005876);; Bi…	K10393|0|hsa:3796|K10393 kinesin family member 2/24 | (RefSeq) KIF2A, CDCBM3, HK2, KIF2; kinesin family member 2A	--	[Z]	Cytoskeleton	Kinesin motor domain;; Microtubule binding	Kinesin-like protein KIF2A OS=Homo sapiens OX=9606 GN=KIF2A PE=1 SV=3	Z	Cytoskeleton	kinesin-like protein KIF2A isoform 1 [Homo sapiens]	cellular component: organelle part (GO:0044422);; cellular component: supramolecular complex (GO:0099080);; cellular component: cell (GO:0005623);; cellular component: cell part (GO:0044464);; cellular component: membrane (GO:0016020);; cellular component: organelle (GO:0043226);; cellular component: macromolecular complex (GO:0032991);; molecular function: catalytic activity (GO:0003824);; molec…
ENSG00000104218	CSPP1	1.53064	193	1.69037	179	2.96188	470	1.04083	176	3.15791	508	1.20307	199	0.046928	-0.733454	down	--	--	Cellular Component: spindle pole (GO:0000922);; Molecular Function: protein binding (GO:0005515);; Cellular Component: cytoplasm (GO:0005737);; Cellular Component: centrosome (GO:0005813);; Cellular Component: microtubule (GO:0005874);; Biological Process: positive regulation of cytokinesis (GO:0032467);;	K16771|0|hsa:79848|K16771 centrosome and spindle pole-associated protein 1 | (RefSeq) CSPP1, CSPP, JBTS21; centrosome and spindle pole associated protein 1	--	--	--	--	Centrosome and spindle pole-associated protein 1 OS=Homo sapiens OX=9606 GN=CSPP1 PE=1 SV=4	Z	Cytoskeleton	PREDICTED: centrosome and spindle pole-associated protein 1 isoform X7 [Homo sapiens]	molecular function: binding (GO:0005488);; biological process: biological regulation (GO:0065007);; cellular component: organelle (GO:0043226);; cellular component: cell part (GO:0044464);; cellular component: organelle part (GO:0044422);; cellular component: supramolecular complex (GO:0099080);; cellular component: cell (GO:0005623);;
ENSG00000243156	MICAL3	8.76894	1898	9.64928	1604	16.1885	3573	6.28767	1403	17.408	3551	7.74247	1573	0.0203214	-0.645702	down	--	--	Molecular Function: actin binding (GO:0003779);; Cellular Component: nucleoplasm (GO:0005654);; Cellular Component: cytoplasm (GO:0005737);; Cellular Component: cytoskeleton (GO:0005856);; Cellular Component: plasma membrane (GO:0005886);; Biological Process: exocytosis (GO:0006887);; Molecular Function: zinc ion binding (GO:0008270);; Molecular Function: oxidoreductase activity, acting on paired…	K19947|0|hsa:57553|K19947 protein-methionine sulfoxide oxidase MICAL [EC:1.14.13.-] | (RefSeq) MICAL3, MICAL-3; microtubule associated monooxygenase, calponin and LIM domain containing 3	--	[TZ]	Signal transduction mechanisms;; Cytoskeleton	Protein of unknown function (DUF3585);; Calponin homology (CH) domain;; CAMSAP CH domain;; LIM domain;; FAD binding domain	[F-actin]-monooxygenase MICAL3 OS=Homo sapiens OX=9606 GN=MICAL3 PE=1 SV=2	Z	Cytoskeleton	[F-actin]-monooxygenase MICAL3 isoform 1 [Homo sapiens]	molecular function: catalytic activity (GO:0003824);; molecular function: binding (GO:0005488);; biological process: localization (GO:0051179);; biological process: single-organism process (GO:0044699);; biological process: cellular component organization or biogenesis (GO:0071840);; biological process: cellular process (GO:0009987);; biological process: metabolic process (GO:0008152);; cellular …
ENSG00000067798	NAV3	0.29469	104	0.349823	40	0.17991	72	0.092514	36	0.219352	82	0.079546	34	0.0483246	-0.995705	down	--	--	Molecular Function: ATP binding (GO:0005524);; Cellular Component: nuclear outer membrane (GO:0005640);;	--	--	--	--	Calponin homology (CH) domain;; ATPase family associated with various cellular activities (AAA)	Neuron navigator 3 OS=Homo sapiens OX=9606 GN=NAV3 PE=1 SV=3	Z	Cytoskeleton	neuron navigator 3 isoform 1 [Homo sapiens]	molecular function: binding (GO:0005488);; cellular component: membrane (GO:0016020);; cellular component: cell part (GO:0044464);; cellular component: organelle (GO:0043226);; cellular component: membrane part (GO:0044425);; cellular component: cell (GO:0005623);; cellular component: organelle part (GO:0044422);;
ENSG00000061337	LZTS1	0.127918	26	0.152786	30	1.17824	264	0.273033	62	1.30864	272	0.172347	43	0.00799268	-1.67292	down	--	--	Molecular Function: DNA binding (GO:0003677);; Molecular Function: transcription factor activity, sequence-specific DNA binding (GO:0003700);; Cellular Component: cytoplasm (GO:0005737);; Biological Process: regulation of transcription, DNA-templated (GO:0006355);; Molecular Function: microtubule binding (GO:0008017);; Cellular Component: postsynaptic density of dendrite (GO:0014069);; Biological…	--	--	--	--	Fez1	Leucine zipper putative tumor suppressor 1 OS=Homo sapiens OX=9606 GN=LZTS1 PE=1 SV=3	Z	Cytoskeleton	leucine zipper putative tumor suppressor 1 [Homo sapiens]	molecular function: nucleic acid binding transcription factor activity (GO:0001071);; molecular function: binding (GO:0005488);; biological process: multicellular organismal process (GO:0032501);; biological process: developmental process (GO:0032502);; biological process: single-organism process (GO:0044699);; biological process: biological regulation (GO:0065007);; biological process: cellular …
ENSG00000116852	KIF21B	0.770916	149	0.456371	92	2.32519	826	0.959185	205	2.79773	864	1.14279	332	0.0174086	-1.21019	down	[R]	General function prediction only	Molecular Function: microtubule motor activity (GO:0003777);; Molecular Function: ATP binding (GO:0005524);; Cellular Component: cytoplasm (GO:0005737);; Cellular Component: kinesin complex (GO:0005871);; Cellular Component: microtubule (GO:0005874);; Biological Process: microtubule-based movement (GO:0007018);; Molecular Function: microtubule binding (GO:0008017);; Molecular Function: ATPase act…	K10395|0|hsa:23046|K10395 kinesin family member 4/21/27 | (RefSeq) KIF21B; kinesin family member 21B	--	[Z]	Cytoskeleton	Kinesin motor domain;; WD domain, G-beta repeat;; Microtubule binding;; Nucleoporin Nup120/160	Kinesin-like protein KIF21B OS=Homo sapiens OX=9606 GN=KIF21B PE=1 SV=2	Z	Cytoskeleton	kinesin-like protein KIF21B isoform 2 [Homo sapiens]	biological process: cellular process (GO:0009987);; biological process: single-organism process (GO:0044699);; molecular function: catalytic activity (GO:0003824);; molecular function: binding (GO:0005488);; cellular component: supramolecular complex (GO:0099080);; cellular component: cell (GO:0005623);; cellular component: organelle part (GO:0044422);; cellular component: macromolecular complex …
ENSG00000139116	KIF21A	2.70744	474	2.35829	335	5.59393	1085	2.77573	446	5.24011	994	2.62186	498	0.0253317	-0.679983	down	[R]	General function prediction only	Molecular Function: microtubule motor activity (GO:0003777);; Molecular Function: ATP binding (GO:0005524);; Cellular Component: cytoplasm (GO:0005737);; Cellular Component: kinesin complex (GO:0005871);; Cellular Component: microtubule (GO:0005874);; Biological Process: microtubule-based movement (GO:0007018);; Molecular Function: microtubule binding (GO:0008017);; Molecular Function: ATPase act…	K10395|0|pps:100989411|K10395 kinesin family member 4/21/27 | (RefSeq) KIF21A; kinesin family member 21A	--	[Z]	Cytoskeleton	Kinesin motor domain;; WD domain, G-beta repeat;; Microtubule binding	Kinesin-like protein KIF21A OS=Homo sapiens OX=9606 GN=KIF21A PE=1 SV=2	Z	Cytoskeleton	kinesin-like protein KIF21A isoform 2 [Homo sapiens]	molecular function: catalytic activity (GO:0003824);; molecular function: binding (GO:0005488);; biological process: single-organism process (GO:0044699);; biological process: cellular process (GO:0009987);; cellular component: organelle part (GO:0044422);; cellular component: supramolecular complex (GO:0099080);; cellular component: cell (GO:0005623);; cellular component: cell part (GO:0044464);…
ENSG00000054523	KIF1B	3.88941	1187	3.17265	916	8.66539	3010	3.50673	1209	9.29813	2948	3.34275	1231	0.00895575	-0.758836	down	--	--	Molecular Function: microtubule motor activity (GO:0003777);; Molecular Function: ATP binding (GO:0005524);; Cellular Component: mitochondrion (GO:0005739);; Cellular Component: kinesin complex (GO:0005871);; Cellular Component: microtubule (GO:0005874);; Biological Process: apoptotic process (GO:0006915);; Biological Process: neuron-neuron synaptic transmission (GO:0007270);; Biological Process:…	K10392|0|mcc:722674|K10392 kinesin family member 1 | (RefSeq) KIF1B; kinesin family member 1B	--	[Z]	Cytoskeleton	Kinesin motor domain;; Kinesin-associated;; Kinesin protein;; Microtubule binding;; Kinesin protein 1B;; PH domain;; FHA domain	Kinesin-like protein KIF1B OS=Homo sapiens OX=9606 GN=KIF1B PE=1 SV=5	Z	Cytoskeleton	KIAA0591 protein, partial [Homo sapiens]	cellular component: supramolecular complex (GO:0099080);; cellular component: organelle part (GO:0044422);; cellular component: cell (GO:0005623);; cellular component: macromolecular complex (GO:0032991);; cellular component: organelle (GO:0043226);; cellular component: membrane (GO:0016020);; cellular component: cell part (GO:0044464);; biological process: signaling (GO:0023052);; biological pro…
ENSG00000276043	UHRF1	6.71256	869	6.12653	700	18.1237	2241	4.43317	640	16.6275	2314	4.5708	683	0.000509412	-1.06424	down	[V]	Defense mechanisms	Biological Process: negative regulation of transcription from RNA polymerase II promoter (GO:0000122);; Cellular Component: euchromatin (GO:0000791);; Molecular Function: core promoter proximal region sequence-specific DNA binding (GO:0000987);; Molecular Function: transcription factor activity, sequence-specific DNA binding (GO:0003700);; Cellular Component: replication fork (GO:0005657);; Cellu…	K10638|0|hsa:29128|K10638 E3 ubiquitin-protein ligase UHRF1 [EC:2.3.2.27] | (RefSeq) UHRF1, ICBP90, Np95, RNF106, TDRD22, hNP95, hUHRF1, huNp95; ubiquitin like with PHD and ring finger domains 1	--	--	--	Tandem tudor domain within UHRF1;; SAD/SRA domain;; Ubiquitin family;; PHD-finger	E3 ubiquitin-protein ligase UHRF1 OS=Homo sapiens OX=9606 GN=UHRF1 PE=1 SV=1	V	Defense mechanisms	E3 ubiquitin-protein ligase UHRF1 isoform 2 [Homo sapiens]	cellular component: membrane-enclosed lumen (GO:0031974);; cellular component: organelle part (GO:0044422);; cellular component: cell (GO:0005623);; cellular component: cell part (GO:0044464);; cellular component: membrane (GO:0016020);; cellular component: organelle (GO:0043226);; biological process: response to stimulus (GO:0050896);; biological process: cellular component organization or bioge…
ENSG00000160179	ABCG1	0.249107	31	0.122414	13	2.31586	283	0.798718	96	2.32092	266	0.534684	70	0.0467305	-1.36527	down	[V]	Defense mechanisms	Cellular Component: Golgi membrane (GO:0000139);; Molecular Function: ATP binding (GO:0005524);; Molecular Function: phospholipid binding (GO:0005543);; Molecular Function: phospholipid transporter activity (GO:0005548);; Cellular Component: nucleoplasm (GO:0005654);; Cellular Component: mitochondrion (GO:0005739);; Cellular Component: endoplasmic reticulum membrane (GO:0005789);; Cellular Compon…	K05679|0|ptr:458577|K05679 ATP-binding cassette, subfamily G (WHITE), member 1 | (RefSeq) ABCG1; ATP binding cassette subfamily G member 1	ABC transporters (ko02010)	[Q]	Secondary metabolites biosynthesis, transport and catabolism	ABC-2 type transporter;; ABC transporter	ATP-binding cassette sub-family G member 1 OS=Homo sapiens OX=9606 GN=ABCG1 PE=1 SV=3	V	Defense mechanisms	ABCG1 isoform 8 [Pan troglodytes]	cellular component: organelle part (GO:0044422);; cellular component: cell (GO:0005623);; cellular component: membrane part (GO:0044425);; cellular component: organelle (GO:0043226);; cellular component: cell part (GO:0044464);; cellular component: membrane (GO:0016020);; molecular function: catalytic activity (GO:0003824);; molecular function: transporter activity (GO:0005215);; molecular functi…
ENSG00000172350	ABCG4	0.144764	20	0.060087	8	0.696	96	0.17119	26	0.815304	117	0.253591	43	0.0475253	-1.27355	down	[V]	Defense mechanisms	Molecular Function: ATP binding (GO:0005524);; Cellular Component: plasma membrane (GO:0005886);; Cellular Component: integral component of membrane (GO:0016021);; Molecular Function: cholesterol transporter activity (GO:0017127);; Biological Process: cholesterol efflux (GO:0033344);; Molecular Function: sterol-transporting ATPase activity (GO:0034041);; Molecular Function: protein homodimerizati…	K05680|0|rro:104657210|K05680 ATP-binding cassette, subfamily G (WHITE), member 4 | (RefSeq) ABCG4; ATP binding cassette subfamily G member 4	ABC transporters (ko02010)	[Q]	Secondary metabolites biosynthesis, transport and catabolism	ABC-2 type transporter;; ABC transporter;; AAA domain, putative AbiEii toxin, Type IV TA system	ATP-binding cassette sub-family G member 4 OS=Homo sapiens OX=9606 GN=ABCG4 PE=1 SV=2	V	Defense mechanisms	PREDICTED: ATP-binding cassette sub-family G member 4 isoform X1 [Pan paniscus]	biological process: localization (GO:0051179);; biological process: single-organism process (GO:0044699);; molecular function: binding (GO:0005488);; molecular function: transporter activity (GO:0005215);; molecular function: catalytic activity (GO:0003824);; cellular component: membrane part (GO:0044425);; cellular component: cell part (GO:0044464);; cellular component: membrane (GO:0016020);; c…
ENSG00000072210	ALDH3A2	4.03188	499	2.91071	321	8.12598	1215	5.41504	408	5.24925	705	5.64234	426	0.0175493	-0.749743	down	[C]	Energy production and conversion	Biological Process: response to reactive oxygen species (GO:0000302);; Biological Process: fatty acid alpha-oxidation (GO:0001561);; Molecular Function: 3-chloroallyl aldehyde dehydrogenase activity (GO:0004028);; Molecular Function: aldehyde dehydrogenase [NAD(P)+] activity (GO:0004030);; Cellular Component: nucleus (GO:0005634);; Cellular Component: mitochondrial inner membrane (GO:0005743);; C…	K00128|0|hsa:224|K00128 aldehyde dehydrogenase (NAD+) [EC:1.2.1.3] | (RefSeq) ALDH3A2, ALDH10, FALDH, SLS; aldehyde dehydrogenase 3 family member A2	Glycolysis / Gluconeogenesis (ko00010);; Pentose and glucuronate interconversions (ko00040);; Ascorbate and aldarate metabolism (ko00053);; Fatty acid degradation (ko00071);; Valine, leucine and isoleucine degradation (ko00280);; Lysine degradation (ko00310);; Arginine and proline metabolism (ko00330);; Histidine metabolism (ko00340);; Tryptophan metabolism (ko00380);; beta-Alanine metabolism (ko…	[C]	Energy production and conversion	Aldehyde dehydrogenase family;; Acyl-CoA reductase (LuxC)	Fatty aldehyde dehydrogenase OS=Homo sapiens OX=9606 GN=ALDH3A2 PE=1 SV=1	C	Energy production and conversion	fatty aldehyde dehydrogenase isoform 2 [Homo sapiens]	biological process: metabolic process (GO:0008152);; biological process: cellular process (GO:0009987);; biological process: response to stimulus (GO:0050896);; biological process: developmental process (GO:0032502);; biological process: multicellular organismal process (GO:0032501);; biological process: single-organism process (GO:0044699);; molecular function: catalytic activity (GO:0003824);; …
Human_newGene_30343	--	3.90993	712	2.98688	467	7.46334	1586	4.58317	687	7.59178	1508	3.44005	638	0.00732328	-0.771411	down	--	--	Molecular Function: protein binding (GO:0005515);; Cellular Component: mitochondrial respiratory chain complex II, succinate dehydrogenase complex (ubiquinone) (GO:0005749);; Biological Process: tricarboxylic acid cycle (GO:0006099);; Biological Process: succinate metabolic process (GO:0006105);; Biological Process: nervous system development (GO:0007399);; Molecular Function: succinate dehydroge…	K00234|0|myd:102766070|K00234 succinate dehydrogenase (ubiquinone) flavoprotein subunit [EC:1.3.5.1] | (RefSeq) SDHA; succinate dehydrogenase complex flavoprotein subunit A	Citrate cycle (TCA cycle) (ko00020);; Oxidative phosphorylation (ko00190);; Carbon metabolism (ko01200);; Non-alcoholic fatty liver disease (NAFLD) (ko04932);; Alzheimer's disease (ko05010);; Parkinson's disease (ko05012);; Huntington's disease (ko05016)	[C]	Energy production and conversion	FAD binding domain;; FAD binding domain;; Fumarate reductase flavoprotein C-term;; Protein of unknown function (DUF1725)	Succinate dehydrogenase [ubiquinone] flavoprotein subunit, mitochondrial OS=Homo sapiens OX=9606 GN=SDHA PE=1 SV=2	C	Energy production and conversion	PREDICTED: succinate dehydrogenase [ubiquinone] flavoprotein subunit, mitochondrial isoform X2 [Cebus capucinus imitator]	biological process: cellular process (GO:0009987);; biological process: metabolic process (GO:0008152);; biological process: multicellular organismal process (GO:0032501);; biological process: developmental process (GO:0032502);; biological process: single-organism process (GO:0044699);; molecular function: catalytic activity (GO:0003824);; molecular function: binding (GO:0005488);; cellular comp…
ENSG00000115616	SLC9A2	0.154645	30	0.065595	12	0.264055	58	0.052335	12	0.231019	48	0.118321	28	0.042553	-1.09094	down	[T]	Signal transduction mechanisms	--	K14722|0|hsa:6549|K14722 solute carrier family 9 (sodium/hydrogen exchanger), member 2 | (RefSeq) SLC9A2, NHE2; solute carrier family 9 member A2	--	[P]	Inorganic ion transport and metabolism	Sodium/hydrogen exchanger family;; Regulatory region of Na+/H+ exchanger NHE binds to calmodulin;; Aft1 HRA domain	Sodium/hydrogen exchanger 2 OS=Homo sapiens OX=9606 GN=SLC9A2 PE=2 SV=1	P	Inorganic ion transport and metabolism	PREDICTED: sodium/hydrogen exchanger 2 [Gorilla gorilla gorilla]	--
ENSG00000198689	SLC9A6	1.46383	248	1.15806	187	3.56671	606	1.35684	258	3.09456	555	1.11642	229	0.0343636	-0.736593	down	[P]	Inorganic ion transport and metabolism	--	K12041|0|ptr:473799|K12041 solute carrier family 9 (sodium/hydrogen exchanger), member 6/7 | (RefSeq) SLC9A6; solute carrier family 9 member A6	--	[P]	Inorganic ion transport and metabolism	Sodium/hydrogen exchanger family	Sodium/hydrogen exchanger 6 OS=Homo sapiens OX=9606 GN=SLC9A6 PE=1 SV=2	P	Inorganic ion transport and metabolism	Solute carrier family 9 (sodium/hydrogen exchanger), member 6 [Homo sapiens]	--
ENSG00000155850	SLC26A2	3.37742	972	2.71538	742	7.715	2521	3.39065	1070	7.61504	2333	2.92022	1017	0.0140055	-0.714287	down	[P]	Inorganic ion transport and metabolism	--	K14701|0|hsa:1836|K14701 solute carrier family 26 (sulfate anion transporter), member 2 | (RefSeq) SLC26A2, D5S1708, DTD, DTDST, EDM4, MST153, MSTP157; solute carrier family 26 member 2	--	[P]	Inorganic ion transport and metabolism	Sulfate permease family;; STAS domain	Sulfate transporter OS=Homo sapiens OX=9606 GN=SLC26A2 PE=1 SV=2	P	Inorganic ion transport and metabolism	PREDICTED: sulfate transporter isoform X1 [Pan troglodytes]	--
ENSG00000110911	SLC11A2	5.48454	557	4.4542	366	8.267	1007	4.21857	476	8.49514	988	3.59327	463	0.0209176	-0.663575	down	[P]	Inorganic ion transport and metabolism	--	K12347|0|rro:104679680|K12347 natural resistance-associated macrophage protein | (RefSeq) SLC11A2; solute carrier family 11 member 2	Lysosome (ko04142);; Mineral absorption (ko04978)	[P]	Inorganic ion transport and metabolism	Natural resistance-associated macrophage protein	Natural resistance-associated macrophage protein 2 OS=Homo sapiens OX=9606 GN=SLC11A2 PE=1 SV=2	P	Inorganic ion transport and metabolism	natural resistance-associated macrophage protein 2 isoform 1 [Homo sapiens]	--
ENSG00000111262	KCNA1	0.265385	76	0.221371	60	0.556784	180	0.149598	47	0.563121	171	0.134292	47	0.0162569	-1.11197	down	[T]	Signal transduction mechanisms	--	K04874|0|hsa:3736|K04874 potassium voltage-gated channel Shaker-related subfamily A member 1 | (RefSeq) KCNA1, AEMK, EA1, HBK1, HUK1, KV1.1, MBK1, MK1, RBK1; potassium voltage-gated channel subfamily A member 1	--	[P]	Inorganic ion transport and metabolism	Ion transport protein;; BTB/POZ domain;; Ion channel	Potassium voltage-gated channel subfamily A member 1 OS=Homo sapiens OX=9606 GN=KCNA1 PE=1 SV=2	P	Inorganic ion transport and metabolism	potassium voltage-gated channel subfamily A member 1 [Homo sapiens]	--
ENSG00000148842	CNNM2	1.59681	256	0.970909	200	2.74476	783	1.68974	329	2.47774	747	1.12311	280	0.0258436	-0.807116	down	[R]	General function prediction only	Biological Process: magnesium ion homeostasis (GO:0010960);; Biological Process: magnesium ion transport (GO:0015693);; Cellular Component: integral component of membrane (GO:0016021);; Cellular Component: basolateral plasma membrane (GO:0016323);;	K16302|0|ptr:450705|K16302 metal transporter CNNM | (RefSeq) CNNM2; cyclin and CBS domain divalent metal cation transport mediator 2	--	[S]	Function unknown	Domain of unknown function DUF21;; CBS domain	Metal transporter CNNM2 OS=Homo sapiens OX=9606 GN=CNNM2 PE=1 SV=2	P	Inorganic ion transport and metabolism	PREDICTED: metal transporter CNNM2 isoform X1 [Gorilla gorilla gorilla]	cellular component: cell (GO:0005623);; cellular component: membrane part (GO:0044425);; cellular component: membrane (GO:0016020);; cellular component: cell part (GO:0044464);; biological process: localization (GO:0051179);; biological process: biological regulation (GO:0065007);;
ENSG00000058668	ATP2B4	4.34396	1387	2.09163	466	7.86393	2808	3.29261	1056	6.31207	1882	2.47035	776	0.000160138	-1.12651	down	[P]	Inorganic ion transport and metabolism	Biological Process: neural retina development (GO:0003407);; Molecular Function: calcium-transporting ATPase activity (GO:0005388);; Molecular Function: calmodulin binding (GO:0005516);; Molecular Function: ATP binding (GO:0005524);; Cellular Component: integral component of plasma membrane (GO:0005887);; Cellular Component: caveola (GO:0005901);; Biological Process: regulation of transcription f…	K05850|0|pps:100988724|K05850 Ca2+ transporting ATPase, plasma membrane [EC:3.6.3.8] | (RefSeq) ATP2B4; ATPase plasma membrane Ca2+ transporting 4	Calcium signaling pathway (ko04020);; cGMP-PKG signaling pathway (ko04022);; cAMP signaling pathway (ko04024);; Adrenergic signaling in cardiomyocytes (ko04261);; Salivary secretion (ko04970);; Pancreatic secretion (ko04972)	[P]	Inorganic ion transport and metabolism	Cation transporting ATPase, C-terminus;; E1-E2 ATPase;; Plasma membrane calcium transporter ATPase C terminal;; Cation transport ATPase (P-type);; Cation transporter/ATPase, N-terminus;; haloacid dehalogenase-like hydrolase;; haloacid dehalogenase-like hydrolase	Plasma membrane calcium-transporting ATPase 4 OS=Homo sapiens OX=9606 GN=ATP2B4 PE=1 SV=2	P	Inorganic ion transport and metabolism	plasma membrane calcium-transporting ATPase 4 isoform 4b [Homo sapiens]	cellular component: cell part (GO:0044464);; cellular component: membrane (GO:0016020);; cellular component: organelle (GO:0043226);; cellular component: membrane part (GO:0044425);; cellular component: organelle part (GO:0044422);; cellular component: supramolecular complex (GO:0099080);; cellular component: cell (GO:0005623);; cellular component: macromolecular complex (GO:0032991);; biological…
[truncated: 653 more rows]
