# Supplementary material for: Chk1 Inhibition Hinders the Restoration of H3.1K56 and H3.3K56 Acetylation and Reprograms Gene Transcription After DNA Damage Repair
Source: Front Oncol. 2022 Apr 14;12:862592. doi: 10.3389/fonc.2022.862592 (PMC9046994; doi:10.3389/fonc.2022.862592)
Supplement: Supplementary Table 4 — Relative expression of genes at 2 h, 8 h, and 24 h after radiation. [file Table_4.xlsx]

## Sheet: Fold Change-Log10
gene_name	DMSO 1 hour	DMSO 8 hours	DMSO 24 hours	LY 1 hour	LY 8 hours	LY 24 hours
CD82	-0.266109	-0.0372972	0.27279	-0.2059	-0.102802	0.115998
CYB5R3	0.0696755	0.251924	0.67142	0.103323	0.301139	0.468522
TIMP1	-0.015865	0.274452	0.417303	-0.0368164	0.250745	0.4935
IL23A	-0.0115192	0.301975	0.495892	-0.406705	0.570356	0.844202
GADD45A	-0.0761716	-0.111081	0.211489	-0.0701029	0.116159	0.410954
ATP6V0B	0.0744414	0.276094	0.485796	0.00285881	0.354476	0.51338
FOSB	-0.287721	-0.12807	0.45281	-0.0416918	0.309599	0.840487
SAT1	0.0944547	0.663086	0.91541	0.348332	0.811077	1.11754
ULBP2	0.160898	0.347415	0.561014	0.1742	0.416919	0.566103
PHLDA1	0.0318725	0.0264364	0.400158	0.10703	0.120293	0.370259
BCL2A1	-0.335113	0.268473	0.584498	-0.173746	0.0802188	0.619956
TOB1	0.0500826	0.549768	0.796019	0.0586	0.849055	1.08941
CBX4	-0.023133	0.272581	0.534978	-0.00508109	0.504974	0.781373
PLK2	-0.324798	0.0463822	0.29022	-0.267545	0.200125	0.549188
GPR61	0.116244	0.621234	0.903214	0.251125	0.900905	1.21404
FAM71A	0.646903	1.75862	2.49986	0.376741	2.10408	2.58083
ESM1	0.175036	0.412443	1.71916	-0.217337	0.12722	1.48322
SOX17	-0.156139	0.4	0.903713	0.183939	0.680261	1.04193
RRAD	0.148566	0.343688	0.84355	0.14497	0.637996	0.965388
B2M	0.122261	0.413141	0.522767	0.173076	0.433483	0.631424
CXCL8	0.350528	0.619276	0.861259	0.452665	0.897285	1.18237
FOS	0.00321006	0.464093	0.96211	0.385283	0.979342	1.40807
KRT75	0.0143413	0.171273	0.736656	-0.0140003	0.0966131	0.455871
KISS1	-0.0684504	0.177874	0.408633	-0.120845	0.2982	0.450136
RND1	0.197619	0.801805	1.47332	0.458588	1.1832	1.74383
TSPEAR	-0.359621	0.279086	0.507997	-0.326347	0.119633	0.464513
FAM43A	-0.0123175	0.368958	0.725327	0.111757	0.730851	0.998807
BCAP31	-0.224519	-0.0760871	0.159601	-0.28616	-0.0324033	0.096332
SP6	0.151938	0.283128	0.540065	0.0957303	0.479239	0.678095
RPS6KL1	-0.336388	1.25789	1.51408	0.307874	1.19113	1.54009
DLL1	0.473299	0.693629	1.32863	0.534263	0.871739	1.41541
FRG2	0.5067	1.26217	1.55167	0.459423	1.5368	1.89223
FRG2B	-0.215616	1.66522	2.03171	0.59535	2.00084	2.30388
MAGEA2	-0.137781	-0.0661984	0.203811	-0.0921649	-0.149359	0.270072
GAGE13	0.492598	0.578817	0.892463	0.576319	0.827395	0.988596
SH3YL1	-0.266448	-0.256133	-0.184655	-0.112772	-0.290453	-0.558638
CROCC	0.0169242	-0.0721053	0.0213219	0.0783723	-0.184196	-0.293976
EVC	-0.0576023	0.0222902	-0.0230592	0.0462582	-0.25255	-0.343273
ITGA6	-0.10136	-0.289558	-0.174606	-0.287115	-0.372419	-0.597762
TSPAN12	-0.0660933	-0.253265	0.126223	-0.166093	-0.46321	-0.660169
PLEKHA8	-0.0367338	-0.143588	-0.101028	-0.228058	-0.389524	-0.397382
HOXB6	-0.260563	-0.107686	0.160959	-0.0474872	-0.536777	-0.51171
SLC25A36	0.223894	0.213911	0.26285	0.0340004	-0.274616	-0.421941
RAB29	-0.0857391	-0.219257	-0.105573	-0.141421	-0.346085	-0.415369
BTN2A2	0.110603	-0.141661	0.188069	0.193596	-0.211137	-0.591224
ADORA2A	0.364097	0.518656	1.10245	0.559676	0.491109	0.525936
CCDC150	0.00681198	-0.000643991	-0.0793591	0.0550784	-0.128369	-0.297225
FBXL2	-0.0331883	-0.165031	-0.132275	0.133941	-0.338463	-0.50167
RAB6B	0.0231011	-0.207271	0.00101252	0.0734141	-0.106873	-0.260393
DTX3L	0.138969	0.0707313	0.066733	0.0409302	-0.209438	-0.274964
YPEL4	-0.0512212	0.0628258	0.0113103	0.361502	-0.32999	-0.57148
FAM111A	0.0249702	-0.0781733	-0.279407	0.161616	-0.537898	-0.733747
CDC42EP5	0.273967	0.122882	0.21121	0.370107	0.127192	-0.288281
TRANK1	0.415593	0.410413	0.44009	0.378688	-0.241324	-0.232403
RHNO1	-0.0459883	-0.166362	0.145001	0.303952	0.0323526	-0.324393
C11orf45	-0.214549	-0.297758	-0.270872	-0.114152	-0.529777	-0.4671
ZNF518A	0.261727	0.221984	0.338728	0.178652	-0.14302	-0.206339
SSTR2	0.118433	0.0926275	0.181533	0.133387	-0.0563467	-0.144436
HOXC10	0.154854	-0.1811	-0.118916	-0.0342156	-0.339141	-0.385922
ZNF555	0.56646	0.144809	0.538308	0.297553	-0.130139	-0.21217
DMBT1	0.662063	0.679578	0.686424	0.854323	0.726388	0.48275
ZNF461	-0.151898	0.0426475	-0.106243	0.0899707	0.0049134	-0.267085
SMOC1	0.482111	0.397559	0.408584	0.494392	0.256241	0.0805168
COL15A1	0.693193	0.620487	0.763827	0.704182	0.442472	0.327626
PCDHA5	0.3124	0.295999	0.40288	0.514375	0.0922498	0.0828785
ZNF888	-0.0263759	-0.14123	-0.0777866	0.0681631	-0.205576	-0.280316
AKAP2	-0.108564	-0.355375	-0.137469	-0.0669621	-0.421759	-1.24189
PCDHGA4	0.371938	0.2716	0.243796	0.342644	0.0629912	-0.18475
HSD17B6	0.153245	-0.0161172	-0.431634	0.163904	0.047599	-0.241375
PITHD1	-0.0575344	-0.163288	-0.187666	-0.0275284	-0.185839	-0.191212
CACNB1	-0.0542339	-0.241651	-0.149087	-0.108049	-0.269462	-0.322113
ANKRD54	-0.102639	-0.278326	-0.208997	-0.0949661	-0.339684	-0.30997
TRADD	0.193673	0.0969468	0.144516	0.192822	-0.00314589	-0.0724504
SGTA	-0.119498	-0.352371	-0.292475	-0.13304	-0.312358	-0.32083
CACTIN	-0.0292462	-0.227222	-0.123656	-0.0757396	-0.234155	-0.243408
SC5D	0.0861615	-0.0983797	-0.167147	0.0317005	-0.178414	-0.166572
GOLT1B	0.0771708	-0.0240152	-0.383016	-0.0699781	-0.143778	-0.190844
PYROXD1	0.130988	-0.164532	-0.231569	-0.130105	0.074191	-0.0963148
CPNE5	0.938064	0.630863	0.418977	0.867183	0.637801	0.497955
SSR1	0.288616	-0.116139	0.213675	0.0678392	0.213878	0.138431
KLF16	0.128271	-0.150776	-0.0478157	0.0762287	-0.0510975	-0.079447
MED10	-0.0575631	-0.246697	-0.154951	-0.111372	-0.222334	-0.226675
KHDC1	-0.0437704	-0.215383	-0.115685	-0.178832	-0.21532	-0.321484
MYC	0.601056	-0.305913	-0.281152	-0.126172	0.320504	0.493507
ASNSD1	-0.0660888	-0.291648	-0.370393	-0.0813038	-0.440725	-0.299929
TAMM41	0.0514575	-0.0220346	-0.175153	0.0321902	-0.0810801	-0.211525
TBCK	-0.107183	-0.206299	-0.156562	-0.00276544	-0.283848	-0.273043
CYB561A3	-0.219722	-0.370468	-0.423919	-0.218589	-0.100654	-0.135289
ZCCHC4	0.140987	-0.134187	-0.148543	-0.000884539	-0.139881	-0.1462
TNIP2	0.175189	-0.0368918	0.075138	0.19175	-0.0235464	-0.0825058
MUC15	0.202218	0.229028	-0.0346958	0.225189	0.0219727	0.063059
DNAJC24	-0.0731303	-0.277306	-0.185408	-0.110881	-0.233988	-0.278031
JUNB	-0.0863455	-0.246162	-0.109648	0.0575913	0.103874	0.174418
ENDOV	0.102533	-0.069385	-0.308939	0.0904086	0.00724428	-0.143551
TNK1	-0.113362	-0.190511	-0.194024	-0.152621	-0.260115	-0.264785
ZNF784	0.0138222	-0.151364	-0.250762	0.0715885	-0.061214	-0.161746
C14orf119	-0.0446976	-0.0673942	-0.0478996	-0.0354863	-0.133891	-0.250266
CHRM4	0.368972	0.0368791	0.155	0.308927	0.0155453	0.0279072
IBA57	0.0435478	-0.130685	-0.179823	0.0883714	-0.133353	-0.131347
ZNF615	0.322713	0.156543	0.254628	0.331546	0.0616056	0.403492
MBLAC1	0.187569	-0.00907702	-0.196215	0.109503	-0.185408	-0.0459669
TMEM250	-0.0538751	-0.199722	-0.256409	0.0989883	-0.338563	-0.156092
CPA4	-0.0879498	-0.350085	-0.531006	-0.0783511	-0.407395	-0.603584
ADAMTS12	0.107378	-0.174724	-0.391125	0.142783	-0.29008	-0.521218
C9orf84	0.0994511	-0.287059	-0.536928	0.12166	-0.243849	-0.550235
									--
									--
									--
									--

## Sheet: Fold Change-Raw
gene_name	DMSO_2_hour	DMSO_8_hours	DMSO_24_hours	LY_2_hour	LY_8_hours	LY_24_hours
CD82	0.541864	0.917704	1.87409	0.622444	0.789219	1.30616
CYB5R3	1.17402	1.78617	4.69267	1.26859	2.0005	2.94119
TIMP1	0.964129	1.88127	2.61399	0.918721	1.78133	3.1153
IL23A	0.973825	2.00435	3.13251	0.392008	3.7184	6.98558
GADD45A	0.839128	0.774317	1.62738	0.850936	1.30665	2.57605
ATP6V0B	1.18697	1.8884	3.06053	1.0066	2.26192	3.26122
FOSB	0.51556	0.744612	2.83668	0.908465	2.03985	6.92608
SAT1	1.24295	4.60348	8.23019	2.23014	6.47257	13.108
ULBP2	1.44843	2.22544	3.63927	1.49348	2.61168	3.68216
PHLDA1	1.07615	1.06276	2.5128	1.27947	1.31915	2.34563
BCL2A1	0.462261	1.85555	3.84148	0.670277	1.20287	4.16827
TOB1	1.12223	3.54624	6.25199	1.14446	7.06407	12.286
CBX4	0.948128	1.87319	3.42751	0.988369	3.1987	6.04468
PLK2	0.473371	1.11271	1.95083	0.540076	1.58535	3.54151
GPR61	1.30691	4.18055	8.00228	1.78289	7.95985	16.3698
FAM71A	4.4351	57.3611	316.126	2.3809	127.082	380.92
ESM1	1.49636	2.5849	52.3788	0.606265	1.34036	30.424
SOX17	0.698009	2.51189	8.01148	1.52735	4.78918	11.0136
RRAD	1.40788	2.20642	6.97509	1.39627	4.34506	9.23397
B2M	1.32514	2.58905	3.33248	1.48962	2.71321	4.27981
CXCL8	2.24145	4.16175	7.26539	2.83573	7.89379	15.2186
FOS	1.00742	2.91134	9.16453	2.42819	9.53547	25.5901
KRT75	1.03357	1.48345	5.45325	0.968277	1.24915	2.85674
KISS1	0.85418	1.50617	2.56232	0.757103	1.98701	2.81927
RND1	1.57623	6.33585	29.7385	2.87467	15.2475	55.4412
TSPEAR	0.436897	1.90146	3.22104	0.471686	1.31714	2.91416
FAM43A	0.972036	2.33861	5.31284	1.29347	5.38085	9.97256
BCAP31	0.596322	0.839292	1.44411	0.517416	0.928104	1.24834
SP6	1.41885	1.91923	3.46789	1.24661	3.01467	4.76536
RPS6KL1	0.460906	18.1088	32.6646	2.03177	15.5284	34.6811
DLL1	2.97371	4.93889	21.3123	3.42187	7.44285	26.0259
FRG2	3.21144	18.2883	35.6177	2.8802	34.4189	78.0243
FRG2B	0.608673	46.261	107.575	3.93867	100.193	201.317
MAGEA2	0.728147	0.858621	1.59886	0.808789	0.708991	1.8624
GAGE13	3.10883	3.79155	7.80662	3.76981	6.7204	9.74083
SH3YL1	0.541443	0.554455	0.65365	0.771309	0.512327	0.276288
CROCC	1.03974	0.847022	1.05032	1.19777	0.654341	0.508187
EVC	0.875785	1.05267	0.948289	1.11239	0.559049	0.453656
ITGA6	0.791845	0.513383	0.66895	0.51628	0.42421	0.252486
TSPAN12	0.858829	0.55813	1.33728	0.682192	0.344184	0.218691
PLEKHA8	0.918896	0.718475	0.79245	0.591483	0.407827	0.400514
HOXB6	0.548828	0.780394	1.44863	0.896423	0.290551	0.307815
SLC25A36	1.67453	1.63648	1.83168	1.08143	0.531354	0.378494
RAB29	0.820845	0.603592	0.7842	0.72207	0.450729	0.384265
BTN2A2	1.29004	0.721671	1.54195	1.56169	0.614982	0.256316
ADORA2A	2.31258	3.30108	12.6604	3.62807	3.09819	3.35688
CCDC150	1.01581	0.998518	0.832992	1.13522	0.7441	0.504399
FBXL2	0.926428	0.683863	0.737438	1.36126	0.458709	0.315014
RAB6B	1.05463	0.620481	1.00233	1.18417	0.781856	0.549044
DTX3L	1.37711	1.17688	1.16609	1.09883	0.617393	0.530929
YPEL4	0.888748	1.15565	1.02638	2.29881	0.467746	0.268238
FAM111A	1.05918	0.83527	0.525524	1.45083	0.289803	0.184609
CDC42EP5	1.87917	1.32703	1.62633	2.34481	1.34027	0.514895
TRANK1	2.60371	2.57284	2.7548	2.3916	0.573689	0.585595
RHNO1	0.899522	0.68177	1.39637	2.0135	1.07734	0.473813
C11orf45	0.61017	0.503781	0.535955	0.76886	0.295273	0.341115
ZNF518A	1.82695	1.66719	2.18136	1.50887	0.719415	0.621814
SSTR2	1.31351	1.23773	1.51891	1.35953	0.878321	0.717074
HOXC10	1.42841	0.659023	0.760473	0.924239	0.457993	0.411224
ZNF555	3.68519	1.39575	3.45389	1.98405	0.741072	0.613522
DMBT1	4.59264	4.78165	4.85762	7.15029	5.32584	3.03914
ZNF461	0.704859	1.10318	0.782992	1.23019	1.01138	0.540648
SMOC1	3.03467	2.49781	2.56203	3.1217	1.80402	1.2037
COL15A1	4.93392	4.17337	5.80533	5.06037	2.76995	2.12631
PCDHA5	2.05305	1.97696	2.5286	3.2687	1.23666	1.21026
ZNF888	0.941075	0.722386	0.836014	1.16994	0.622908	0.524426
AKAP2	0.778818	0.441189	0.72867	0.857113	0.378652	0.0572935
PCDHGA4	2.35471	1.86896	1.75306	2.20112	1.15609	0.653507
HSD17B6	1.42313	0.963569	0.37014	1.45849	1.11583	0.573621
PITHD1	0.875922	0.686612	0.649134	0.938581	0.65187	0.643855
CACNB1	0.882604	0.573257	0.709436	0.779743	0.537698	0.476307
ANKRD54	0.789516	0.526834	0.618021	0.803589	0.457421	0.489812
TRADD	1.56197	1.25011	1.39481	1.55891	0.992782	0.846349
SGTA	0.759456	0.444252	0.509947	0.736139	0.487127	0.477716
CACTIN	0.934876	0.592622	0.752219	0.839963	0.583237	0.570942
SC5D	1.21944	0.797297	0.680538	1.07572	0.663111	0.681441
GOLT1B	1.19446	0.946204	0.413985	0.851181	0.718161	0.644401
PYROXD1	1.35204	0.68465	0.58672	0.741131	1.18629	0.801097
CPNE5	8.67091	4.27428	2.62408	7.36517	4.34311	3.14742
SSR1	1.94364	0.765352	1.63559	1.16907	1.63636	1.37541
KLF16	1.3436	0.706682	0.895745	1.19187	0.889001	0.832824
MED10	0.875864	0.566634	0.699921	0.773798	0.59933	0.593369
KHDC1	0.904127	0.609	0.766152	0.662472	0.609087	0.476998
MYC	3.99077	0.49441	0.523417	0.747873	2.09172	3.11535
ASNSD1	0.858838	0.510919	0.426194	0.82927	0.362472	0.501269
TAMM41	1.12579	0.950529	0.668108	1.07694	0.829698	0.614433
TBCK	0.781298	0.621871	0.69733	0.993653	0.520178	0.533282
CYB561A3	0.602946	0.42612	0.376774	0.60452	0.793134	0.732336
ZCCHC4	1.38353	0.734197	0.710324	0.997965	0.724635	0.714167
TNIP2	1.49689	0.918562	1.18888	1.55507	0.947226	0.826978
MUC15	1.59301	1.69445	0.923218	1.67954	1.0519	1.15627
DNAJC24	0.845025	0.528073	0.652517	0.774674	0.583462	0.527193
JUNB	0.819699	0.567333	0.776877	1.1418	1.27021	1.49423
ENDOV	1.26629	0.852344	0.490977	1.23143	1.01682	0.718537
TNK1	0.770261	0.644896	0.639699	0.703686	0.549396	0.543519
ZNF784	1.03234	0.705725	0.561355	1.1792	0.868532	0.689055
C14orf119	0.902199	0.85626	0.895572	0.921539	0.734698	0.561997
CHRM4	2.33869	1.08863	1.42889	2.0367	1.03644	1.06637
IBA57	1.10547	0.740141	0.660963	1.22566	0.735609	0.739015
ZNF615	2.10239	1.43398	1.79733	2.14559	1.15241	2.53216
MBLAC1	1.54017	0.979316	0.63648	1.28678	0.652518	0.899566
TMEM250	0.883334	0.631362	0.554104	1.256	0.458603	0.698085
CPA4	0.816677	0.446596	0.294438	0.834928	0.391385	0.249124
ADAMTS12	1.2805	0.668769	0.406327	1.38926	0.512767	0.301149
C9orf84	1.25734	0.516347	0.290451	1.3233	0.570362	0.281686
